# Supplementary material
Source: PubMed Central journal article supplement (PMC7123484)

# **A 16-Step Synthesis of the Isoryanodane Diterpene (+)-Perseanol**

Arthur Han, Yujia Tao, Sarah E. Reisman\*

*The Warren and Katharine Schlinger Laboratory for Chemistry and Chemical Engineering  
Division of Chemistry and Chemical Engineering, California Institute of Technology  
Pasadena, California 91125  
reisman@caltech.edu*

**Supporting Information:**

## Table of Contents

|                                                                              |     |
|------------------------------------------------------------------------------|-----|
| 1. General Procedures.....                                                   | S3  |
| 2. Positional Numbering.....                                                 | S4  |
| 3. Synthetic Scheme of Inoue's Isoryanodane Approach.....                    | S4  |
| 4. Synthetic Procedures.....                                                 | S5  |
| 5. $^1\text{H}$ and $^{13}\text{C}$ NMR Comparison Tables for Perseanol..... | S33 |
| 6. Single Crystal X-Ray Diffraction Data.....                                | S35 |
| 7. References.....                                                           | S40 |
| 8. $^1\text{H}$ and $^{13}\text{C}$ NMR Spectral Data.....                   | S41 |

## 1. General Procedures

Unless otherwise stated, reactions were performed under an inert atmosphere (dry Ar) with freshly dried solvents utilizing standard Schlenk techniques. Glassware was oven-dried at 120 °C for a minimum of four hours, or flame-dried utilizing a Bunsen burner under high vacuum. Tetrahydrofuran (THF), methylene chloride (CH<sub>2</sub>Cl<sub>2</sub>), acetonitrile (MeCN), 1,4-dioxane, and toluene (PhMe) were dried by passing through activated alumina columns. Methanol (HPLC grade) was purchased from Fisher Scientific. 1,2-dichloroethane (DCE), 2,2,6,6-tetramethylpiperidine (TMP), and diisopropylamine (*i*-Pr<sub>2</sub>NH) were distilled from calcium hydride prior to use and stored under argon. All reactions were monitored by thin-layer chromatography using EMD/Merck silica gel 60 F254 pre-coated plates (0.25 mm) and were visualized by UV (254 nm) and/or *p*-anisaldehyde or KMnO<sub>4</sub> staining. Flash column chromatography was performed using silica gel (SiliaFlash® P60, particle size 40-63 microns [230 to 400 mesh]) purchased from Silicycle. <sup>1</sup>H and <sup>13</sup>C NMR spectra were recorded on a Bruker Avance III HD with Prodigy Cryoprobe (at 400 MHz and 101 MHz, respectively), Varian Inova 400 (at 400 MHz and 101 MHz, respectively), and Varian Inova 500 (at 500 MHz and 126 MHz, respectively) and are reported relative to internal CHCl<sub>3</sub> (<sup>1</sup>H, δ = 7.26), C<sub>6</sub>H<sub>6</sub> (<sup>1</sup>H, δ = 7.16), or CD<sub>2</sub>HOD (<sup>1</sup>H, δ = 3.31), and CDCl<sub>3</sub> (<sup>13</sup>C, δ = 77.0), C<sub>6</sub>D<sub>6</sub> (<sup>13</sup>C, δ = 128.0), or CD<sub>3</sub>OD (<sup>13</sup>C, δ = 49.0). Data for <sup>1</sup>H NMR spectra are reported as follows: chemical shift (δ ppm) (multiplicity, coupling constant (Hz), integration). Multiplicity and qualifier abbreviations are as follows: s = singlet, d = doublet, t = triplet, q = quartet, p = pentet, hept = heptet, m = multiplet, br = broad, app = apparent. IR spectra were recorded on a Perkin Elmer Paragon 1000 spectrometer and are reported in frequency of absorption (cm<sup>-1</sup>). HRMS were acquired using an Agilent 6200 Series TOF with an Agilent G1978A Multimode source in electrospray ionization (ESI), atmospheric pressure chemical ionization (APCI), or mixed (MM) ionization mode. Optical rotations were measured on a Jasco P-2000 polarimeter using a 100 mm path-length cell at 589 nm.

Reagents were purchased from commercial vendors as follows: (*R*)-(+)-pulegone (92%) and 2-phenylnaphthalene were purchased from Acros Organics. Solid potassium bis(trimethylsilyl)amide (KHMDs, 95%), tetrakis(triphenylphosphine)palladium(0) (Pd(PPh<sub>3</sub>)<sub>4</sub>), and potassium fluoride (KF) were purchased from Sigma-Aldrich and stored in a nitrogen-filled glovebox. Diisobutylaluminum hydride (1.0 M in hexanes), tetrakisacetonitrile copper(I) triflate, 4,4'-dimethoxy-2,2'-bipyridine (<sup>MeO</sup>bpy), 1-methylimidazole (NMI, ≥99%), 9-azabicyclo[3.3.1]nonane *N*-oxyl (ABNO), (*R*)-(+)-2-Me-CBS-oxazaborolidine, 2,3-dichloro-5,6-dicyano-*p*-benzoquinone (DDQ), methylmagnesium chloride (3.0 M in THF), vanadium(V) tripropoxide (VO(*On*-Pr<sub>3</sub>)), and TBHP (5.5 M in decane over 4 Å MS) were purchased from Sigma-Aldrich. *N*-formylsaccharin was purchased from TCI and stored in a nitrogen-filled glovebox. Selenium dioxide (99.999%) was purchased from Strem Chemicals and stored in a nitrogen-filled glovebox.

## 2. Positional Numbering

The carbon numbering system and ring assignment as outlined by Inoue and coworkers<sup>1</sup> are utilized throughout this Supplementary Materials file for <sup>1</sup>H and <sup>13</sup>C NMR assignments of all intermediates. Assignments were made with the aid of 2D <sup>1</sup>H-<sup>1</sup>H (NOESY and COSY) and <sup>1</sup>H-<sup>13</sup>C coupling experiments (HSQC and HMBC).

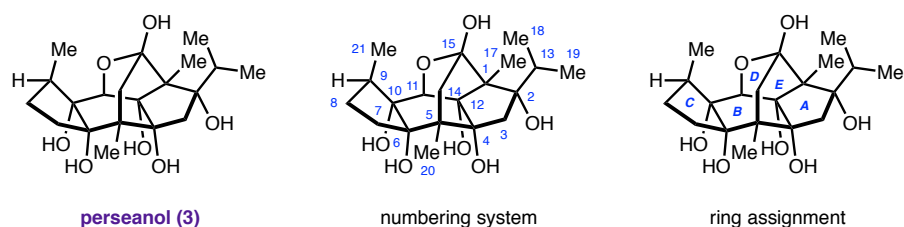

## 3. Synthetic Scheme of Inoue's Isoryanodane Approach

**Figure S1.** Inoue's conversion of a ryanodol intermediate to the isoryanodane framework.

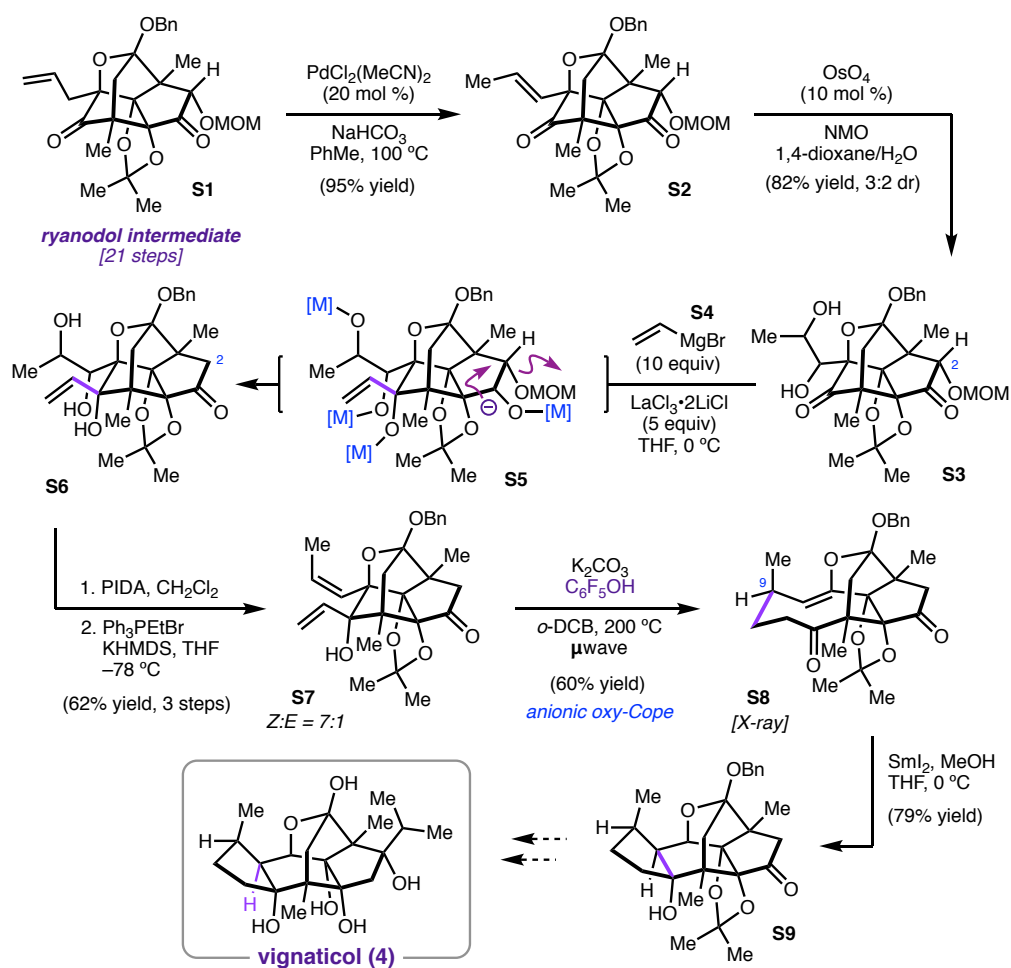



### 3. Synthetic Procedures

#### Preparation of methyl pulegenate (12)

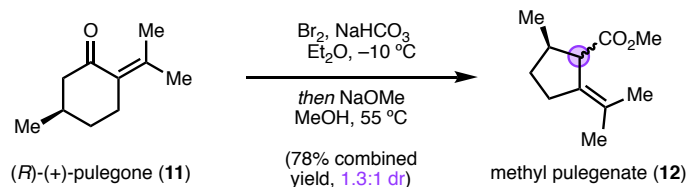

According to the one-step procedure<sup>2</sup> of Zhang and coworkers, an oven-dried, 250 mL round-bottomed flask was charged with distilled (*R*)-(+)-pulegone (30.0 g, 197 mmol, 1.0 equiv), anhydrous  $\text{Et}_2\text{O}$  (150 mL), and  $\text{NaHCO}_3$  (4.97 g, 59.1 mmol, 0.3 equiv). The suspension was cooled to  $-10^\circ\text{C}$  via an ice/acetone bath, then treated with  $\text{Br}_2$  (11.1 mL, 217 mmol, 1.1 equiv) dropwise over 30 min via syringe pump. Upon complete addition, the reaction mixture was vigorously stirred for 2.5 h at  $-10^\circ\text{C}$  and then transferred via cannula over 30 min to a freshly generated solution of  $\text{NaOMe}$  in  $\text{MeOH}$ —prepared from 9.96 g  $\text{Na}^0$  (433 mmol, 2.2 equiv) and 200 mL anhydrous  $\text{MeOH}$  in an oven-dried, 1 L two-necked round-bottomed flask—at  $0^\circ\text{C}$  under Ar. The resulting white slurry was warmed to ambient temperature, then the flask was equipped with a reflux condenser and placed in a preheated oil bath at  $55^\circ\text{C}$ . The reaction mixture was stirred at  $55^\circ\text{C}$  for 4 h before cooling to ambient temperature, then further cooled to  $0^\circ\text{C}$  via an ice/water bath before diluting with  $\text{Et}_2\text{O}$  (100 mL) and quenching with the *careful* addition of sat. aq.  $\text{NH}_4\text{Cl}$  (450 mL). The mixture was warmed to ambient temperature, the layers were separated, and the aqueous layer was extracted with  $\text{Et}_2\text{O}$  ( $3 \times 250$  mL). The combined layers were washed with brine (500 mL), dried over  $\text{MgSO}_4$ , filtered, and concentrated *in vacuo*. The crude residue was purified via  $\text{SiO}_2$  flash chromatography (2.5 to 5 to 10%  $\text{Et}_2\text{O}$ /hexanes) to afford methyl pulegenate (30.1 g, 153 mmol, 78% combined yield) as an inseparable 1.3:1 diastereomeric mixture.

Spectral data of the diastereomeric mixture of methyl pulegenates matched that previously reported.<sup>3</sup> Where discernable, the major *syn* diastereomer is designated by \* and the minor *anti* diastereomer is designated by #.

**TLC (10%  $\text{Et}_2\text{O}$ /hexanes):**  $R_f$  0.57 (*p*-anisaldehyde).

**$^1\text{H}$  NMR (400 MHz,  $\text{CDCl}_3$ ):**  $\delta$  3.67 (s, 3H)<sup>#</sup>, 3.65 (s, 3H)<sup>\*</sup>, 3.41 (d,  $J = 8.0$  Hz, 1H)<sup>\*</sup>, 2.95 (d,  $J = 5.5$  Hz, 1H)<sup>#</sup>, 2.45 (m), 2.37 (m), 2.24 (m), 1.97 (m, 1H)<sup>#</sup>, 1.79 (m), 1.70 (m), 1.66 (s, 3H)<sup>#</sup>, 1.63 (s, 3H)<sup>\*</sup>, 1.61 (s, 3H)<sup>\*</sup>, 1.57 (s, 3H)<sup>#</sup>, 1.26 (m, 1H)<sup>#</sup>, 1.06 (d,  $J = 6.8$  Hz, 3H)<sup>#</sup>, 1.01 (d,  $J = 6.9$  Hz, 3H)<sup>\*</sup>.

**$^{13}\text{C}$  NMR (101 MHz,  $\text{CDCl}_3$ ):**  $\delta$  176.1<sup>#</sup>, 174.5<sup>\*</sup>, 134.9<sup>\*</sup>, 134.2<sup>#</sup>, 125.9<sup>#</sup>, 125.7<sup>\*</sup>, 55.6<sup>#</sup>, 52.7<sup>\*</sup>, 51.6<sup>#</sup>, 51.0<sup>\*</sup>, 40.8<sup>#</sup>, 38.9<sup>\*</sup>, 33.7<sup>#</sup>, 32.7<sup>\*</sup>, 30.4<sup>#</sup>, 30.2<sup>\*</sup>, 21.5<sup>#</sup>, 21.1<sup>\*</sup>, 21.0<sup>\*</sup>, 20.9<sup>#</sup>, 19.6<sup>#</sup>, 15.7<sup>\*</sup>.

**FTIR (NaCl, thin film):** 2952, 2355, 1731, 1433, 1349  $\text{cm}^{-1}$ .

**HRMS (ESI):** calc'd for  $[\text{M}+\text{H}]^+$  183.1380, found 183.1375.

## Preparation of $\alpha$ -hydroxyester **13**

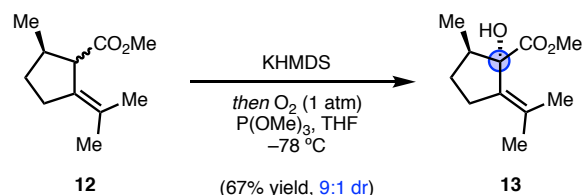

In a nitrogen-filled glovebox, an oven-dried, 1 L round-bottomed flask was charged with solid KHMDS (95%, 21.4 g, 102 mmol, 2.0 equiv). The flask was capped with a rubber septum, removed from the glovebox, and anhydrous THF (250 mL) was added. The resulting mixture was stirred at ambient temperature for 10-15 min to ensure complete dissolution of the solids, then cooled to -10 °C via an ice/acetone bath and stirring continued for 15 min before adding methyl puleginate (10.0 g, 50.9 mmol, 1.0 equiv) in anhydrous THF (150 mL) dropwise via cannula over 30 min, before another portion of THF (50 mL) was used to render the transfer quantitative. The bright-yellow reaction mixture was aged at -10 °C an additional 20 min before it was further cooled to -78 °C via a dry ice/acetone bath. The flask was then evacuated/refilled three times with O<sub>2</sub> supplied via a double-walled balloon, after which, in quick succession, P(OMe)<sub>3</sub> (12 mL, 102 mmol, 2.0 equiv) was added via syringe. The reaction was vigorously stirred (>650 rpm) under O<sub>2</sub> at -78 °C until TLC analysis indicated the complete consumption of starting material (*ca.* 1 h). The reaction mixture was diluted with Et<sub>2</sub>O (50 mL), quenched with sat. aq. NH<sub>4</sub>Cl (200 mL) and sat. aq. Na<sub>2</sub>S<sub>2</sub>O<sub>3</sub> (50 mL), then warmed to ambient temperature. The layers were separated and the aqueous layer was then extracted with Et<sub>2</sub>O (3 × 150 mL). The combined organic layers were washed with brine (150 mL), dried over MgSO<sub>4</sub>, filtered over a short, pre-equilibrated SiO<sub>2</sub> pad, washing with 50% EtOAc/hexanes, and concentrated *in vacuo*. <sup>1</sup>H NMR analysis of the crude product indicated that the reaction occurs with full consumption of the starting material in a 9:1 diastereomeric ratio. Purification by SiO<sub>2</sub> flash chromatography (5 to 10 to 20% EtOAc/hexanes) afforded  $\alpha$ -hydroxyester **13** as a clear oil (6.77 g, 34.1 mmol, 67% yield).

**TLC (20% EtOAc/hexanes):** R<sub>f</sub> 0.44 (*p*-anisaldehyde).

**<sup>1</sup>H NMR (400 MHz, CDCl<sub>3</sub>):**  $\delta$  3.77 (s, 3H), 2.48 – 2.37 (m, 2H), 2.20 (dt, *J* = 13.3, 6.8 Hz, 1H), 1.81 (dtd, *J* = 13.0, 6.6, 2.6 Hz, 1H), 1.65 (s, 3H), 1.63 (t, *J* = 2.1 Hz, 3H), 1.57 – 1.46 (m, 1H), 0.89 (d, *J* = 6.9 Hz, 3H).

**<sup>13</sup>C NMR (101 MHz, CDCl<sub>3</sub>):**  $\delta$  176.7, 135.9, 129.5, 83.9, 52.5, 48.4, 30.0, 29.8, 22.4, 19.5, 13.4.

**FTIR (NaCl, thin film):** 3516, 2953, 2874, 1719, 1459, 1437, 1371, 1313, 1236, 1178, 1146, 1117, 1063 cm<sup>-1</sup>.

**HRMS (MM:ESI-APCI):** calc'd for [M-OH]<sup>+</sup> 181.1223, found 181.1221.

**$[\alpha]_D^{25}$**  = +9° (*c* = 0.905, CHCl<sub>3</sub>).

## Preparation of epoxide **14**

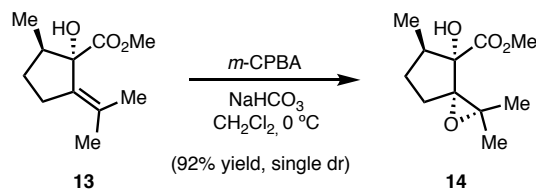

An oven dried, 500 mL round-bottomed flask was charged with alkene **13** (7.28 g, 36.7 mmol, 1.0 equiv) and anhydrous CH<sub>2</sub>Cl<sub>2</sub> (180 mL). The solution was cooled to 0 °C via an ice/water bath and then treated with NaHCO<sub>3</sub> (12.3 g, 147 mmol, 4.0 equiv) and *m*-CPBA (77% w/w, 12.3 g, 55.1 mmol, 1.5 equiv) [Note: *m*-CPBA was dried *in vacuo* for >12 h prior to use to remove H<sub>2</sub>O]. The suspension was vigorously stirred at 0 °C for 1 h before an additional portion of *m*-CPBA (77% w/w, 4.11 g, 18.4 mmol, 0.5 equiv) was added. Stirring was continued for an additional 1 h after which TLC analysis indicated the complete consumption of starting material. The reaction mixture was diluted with CH<sub>2</sub>Cl<sub>2</sub> (50 mL) and quenched with the addition of sat. aq. NaHCO<sub>3</sub> (100 mL) and sat. aq. Na<sub>2</sub>S<sub>2</sub>O<sub>3</sub> (100 mL). The resulting mixture was warmed to room temperature and the layers were separated. The aqueous layer was extracted with CH<sub>2</sub>Cl<sub>2</sub> (3 × 150 mL) and the combined organic layers were washed with sat. aq. NaHCO<sub>3</sub> (200 mL), dried over Na<sub>2</sub>SO<sub>4</sub>, filtered, and concentrated *in vacuo*. The crude residue was purified by SiO<sub>2</sub> flash chromatography (15 to 25 to 35% EtOAc/hexanes) to afford epoxide **14** (7.24 g, 13.9 mmol, 92% yield) as a colorless oil.

**TLC (20% EtOAc/hexanes):** R<sub>f</sub> 0.23 (*p*-anisaldehyde).

**<sup>1</sup>H NMR (400 MHz, CDCl<sub>3</sub>):** δ 3.76 (s, 3H), 2.94 (br s, 1H), 2.31 – 2.22 (m, 1H), 2.23 – 2.16 (m, 1H), 1.91 – 1.78 (m, 2H), 1.56 – 1.44 (m, 1H), 1.32 (s, 3H), 1.21 (s, 3H), 1.00 (d, *J* = 6.8 Hz, 3H).

**<sup>13</sup>C NMR (101 MHz, CDCl<sub>3</sub>):** δ 173.1, 81.6, 74.1, 63.1, 51.8, 47.7, 28.9, 27.2, 22.5, 19.2, 14.1.

**FTIR (NaCl, thin film):** 3480, 2957, 2876, 1756, 1723, 1463, 1436, 1377, 1238, 1187, 1142, 1068, 1005 cm<sup>-1</sup>.

**HRMS (MM:ESI-APCI):** calc'd for [M+H]<sup>+</sup> 215.1278, found 215.1281.

**[α]<sub>D</sub><sup>25</sup>** = -2° (*c* = 0.770, CHCl<sub>3</sub>).

## Preparation of diol 15

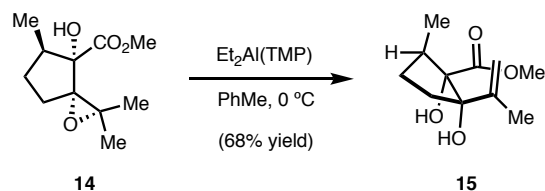

An oven-dried, 500 mL round-bottomed flask was charged with 2,2,6,6-tetramethylpiperidine (16 mL, 93.3 mmol, 2.5 equiv) and anhydrous PhMe (45 mL). The solution was cooled to 0 °C via an ice/water bath and then *n*-BuLi (2.5 M in hexanes, 36 mL, 89.6 mmol, 2.4 equiv) was added dropwise via syringe. After 30 mins of continued stirring at 0 °C, the solution of LiTMP was treated with Et<sub>2</sub>AlCl (1.0 M in hexanes, 90 mL, 89.6 mmol, 2.4 equiv) dropwise via syringe and stirring was continued for another 30 mins at 0 °C affording a cloudy pale-yellow solution. Epoxide **14** (8.00 g, 37.3 mmol, 1.0 equiv) in anhydrous PhMe (45 mL) was next added dropwise via cannula over 15 min to the freshly generated slurry of Et<sub>2</sub>Al(TMP), before another portion of PhMe (15 mL) was used to render the transfer quantitative. Upon complete addition, the reaction mixture was allowed 1.5 h at 0 °C at which time TLC analysis indicated the consumption of starting material. The reaction was quenched with the *careful* addition of sat. aq. Rochelle's salt (180 mL), diluted with EtOAc (50 mL) and warmed to ambient temperature. The mixture was next vigorously stirred until two clear layers were observed, then the layers were separated, and the aqueous layer was extracted with Et<sub>2</sub>O (3 × 180 mL). The combined organic layers were washed with brine (200 mL), dried over Na<sub>2</sub>SO<sub>4</sub>, filtered, and concentrated *in vacuo*. The crude residue was purified by SiO<sub>2</sub> flash chromatography (20 to 30% EtOAc/hexanes) to afford diol **15** (5.44 g, 25.4 mmol, 68% yield) as a yellow oil.

**TLC (20% EtOAc/hexanes):** R<sub>f</sub> 0.25 (*p*-anisaldehyde).

**<sup>1</sup>H NMR (400 MHz, CDCl<sub>3</sub>):** δ 4.89 (d, *J* = 1.0 Hz, 1H), 4.84 (s, 1H), 3.77 (d, *J* = 2.4 Hz, 3H), 3.09 (dd, *J* = 2.2, 0.6 Hz, 1H), 2.64 – 2.57 (m, 1H), 2.45 – 2.36 (m, 1H), 2.11 – 2.01 (m, 1H), 1.90 (ddd, *J* = 14.3, 10.1, 4.2 Hz, 1H), 1.76 (dd, *J* = 1.5, 0.7 Hz, 3H), 1.54 – 1.43 (m, 1H), 0.91 (d, *J* = 7.0 Hz, 3H).

**<sup>13</sup>C NMR (101 MHz, CDCl<sub>3</sub>):** δ 174.8, 146.5, 111.9, 89.5, 84.3, 52.7, 41.9, 32.9, 27.2, 19.9, 14.2.

**FTIR (NaCl, thin film):** 3500, 2955, 2876, 1732, 1722, 1717, 1456, 1436, 1242, 1204, 1124, 1051 cm<sup>-1</sup>.

**HRMS (MM:ESI-APCI):** calc'd for [M+H]<sup>+</sup> 215.1278, found 215.1279.

[α]<sub>D</sub><sup>25</sup> = -11° (*c* = 0.560, CHCl<sub>3</sub>).

## Preparation of alcohol 17

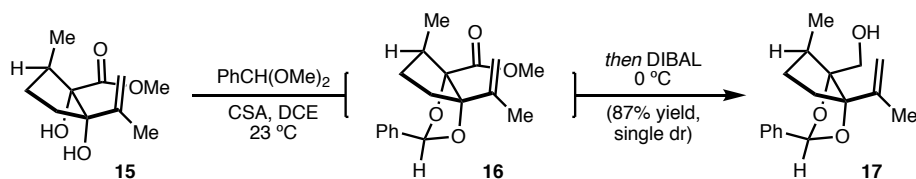

An oven-dried, 500 mL round-bottomed flask was charged with diol **15** (1.00 g, 4.7 mmol, 1.0 equiv) and anhydrous DCE (47 ml). The solution was treated with ( $\pm$ )-10-camphorsulfonic acid (1.09 g, 4.7 mmol, 1.0 equiv) and benzaldehyde dimethyl acetal (3.5 mL, 23.4 mmol, 5.0 equiv). The resulting solution was stirred for 1.5 h at room temperature, at which point TLC analysis indicated complete conversion of starting material.  $^1\text{H}$  NMR analysis of a reaction aliquot confirms that the reaction proceeds with the generation of a single dr of the benzylidene acetal. The reaction mixture was thereafter cooled to 0 °C via an ice/water bath, and then DIBAL (1.0 M in hexanes, 42 mL, 42.1 mmol, 9.0 equiv) was added dropwise via syringe. After 1 h of continued stirring at 0 °C, TLC analysis showed complete consumption of intermediate protected diol **16**. The reaction mixture was next *carefully* treated with EtOAc (30 mL) followed by sat. aq. Rochelle's salt (85 mL). The cooling bath was removed and the mixture was vigorously stirred overnight at ambient temperature. The resulting two layers were separated and the aqueous layer extracted with EtOAc (3  $\times$  80 mL). The combined organic layers were washed with brine (100 mL), dried over  $\text{Na}_2\text{SO}_4$ , filtered, and concentrated *in vacuo*. The crude residue was purified by  $\text{SiO}_2$  flash chromatography (10 to 15 to 20 % EtOAc/hexanes) to afford alcohol **17** (1.12 g, 4.1 mmol, 87% yield) as a thick, colorless oil.

### benzylidene acetal 16:

**TLC (20% EtOAc/hexanes):**  $R_f$  0.70 (UV, *p*-anisaldehyde).

**$^1\text{H}$  NMR (400 MHz,  $\text{CDCl}_3$ ):**  $\delta$  7.60 – 7.52 (m, 2H), 7.39 (dt,  $J = 5.2, 1.7$  Hz, 3H), 6.12 (d,  $J = 1.3$  Hz, 1H), 5.14 (s, 1H), 5.04 (d,  $J = 1.4$  Hz, 1H), 3.75 (s, 3H), 2.59 (q,  $J = 6.9$  Hz, 1H), 2.39 – 2.21 (m, 2H), 2.13 – 2.04 (m, 1H), 1.88 (s, 3H), 1.65 (td,  $J = 6.2, 5.4, 3.9$  Hz, 1H), 1.08 (dd,  $J = 7.3, 1.3$  Hz, 3H).

**$^{13}\text{C}$  NMR (101 MHz,  $\text{CDCl}_3$ ):**  $\delta$  170.5, 143.4, 136.9, 129.5, 128.4, 126.8, 113.1, 104.9, 97.6, 96.7, 51.8, 44.9, 35.0, 31.7, 20.5, 15.1.

**FTIR (NaCl, thin film):** 2949, 2876, 1735, 1457, 1435, 1395, 1259, 1221, 1116, 1089, 1063, 1027  $\text{cm}^{-1}$ .

**HRMS (MM:ESI-APCI):** calc'd for  $[\text{M}+\text{H}]^+$  303.1591, found 303.1598.

$[\alpha]_{\text{D}}^{25} = -39^\circ$  ( $c = 0.590$ ,  $\text{CHCl}_3$ ).

### alcohol 17:

**TLC (20% EtOAc/hexanes):**  $R_f$  0.22 (UV, *p*-anisaldehyde).

**$^1\text{H}$  NMR (400 MHz,  $\text{CDCl}_3$ ):**  $\delta$  7.62 – 7.53 (m, 2H), 7.45 – 7.36 (m, 3H), 5.82 (d,  $J = 1.1$  Hz, 1H), 5.28 – 5.19 (m, 1H), 5.08 (t,  $J = 1.5$  Hz, 1H), 3.82 (dd,  $J = 12.2, 2.2$  Hz, 1H), 3.76 – 3.62 (m, 1H), 2.51 (p,  $J = 7.3$  Hz, 1H),

2.40 (tt,  $J = 12.8, 6.5$  Hz, 1H), 2.18 (td,  $J = 13.5, 6.4$  Hz, 1H), 2.01 – 1.90 (m, 2H), 1.88 (dd,  $J = 1.5, 0.8$  Hz, 3H), 1.46 (dd,  $J = 12.3, 6.4$  Hz, 1H), 1.07 (dd,  $J = 7.5, 1.1$  Hz, 3H).

$^{13}\text{C}$  NMR (101 MHz,  $\text{CDCl}_3$ ):  $\delta$  143.1, 136.4, 129.8, 128.5, 126.9, 113.2, 101.4, 97.2, 94.9, 60.7, 40.8, 36.4, 29.6, 20.7, 14.5.

FTIR (thin film/ $\text{NaCl}$ ): 3465, 2962, 2876, 1460, 1453, 1397, 1310, 1220, 1125, 1088, 1061, 1027  $\text{cm}^{-1}$ .

HRMS (MM:ESI-APCI): calc'd for  $[\text{M}]^+$  274.1563, found 274.1564.

$[\alpha]_{\text{D}}^{25} = -17^\circ$  ( $c = 0.895$ ,  $\text{CHCl}_3$ ).

### Preparation of aldehyde **18**

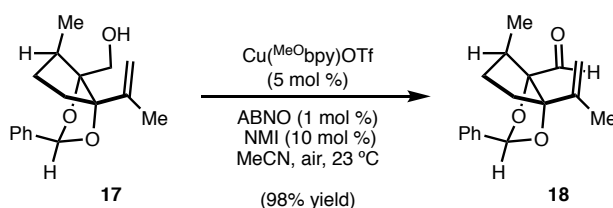

An oven-dried, 200 mL round-bottomed flask was charged with alcohol **17** (2.27 g, 8.27 mmol, 1.0 equiv) and anhydrous MeCN (83 mL). The solution was vigorously stirred (>700 rpm) open to air while being treated with  $\text{MeObpy}$  (89 mg, 0.41 mmol, 0.05 equiv),  $\text{Cu}(\text{MeCN})_4\text{OTf}$  (156 mg, 0.41 mmol, 0.05 equiv), ABNO (11.6 mg, 82.7  $\mu\text{mol}$ , 0.01 equiv), and then NMI (66  $\mu\text{L}$ , 0.83 mmol, 0.10 equiv) via microsyringe. The resulting brick-red reaction mixture was vigorously stirred exposed to air at ambient temperature until the reaction mixture turned a blue-green (*ca.* 1.75 h), at which point TLC analysis indicated the complete consumption of starting material. The reaction mixture was diluted with  $\text{Et}_2\text{O}$  (40 mL), and filtered through a pre-equilibrated  $\text{SiO}_2$  pad layered with Celite, washing with 50% EtOAc/hexanes. The filtrate was concentrated *in vacuo* and the crude residue was directly purified by  $\text{SiO}_2$  flash chromatography (5 to 7.5 to 10% EtOAc/hexanes) to afford aldehyde **18** (2.21 g, 8.10 mmol, 98% yield) as a pale yellow oil.

TLC (20% EtOAc/hexanes):  $R_f$  0.52 (UV, *p*-anisaldehyde).

$^1\text{H}$  NMR (400 MHz,  $\text{CDCl}_3$ ):  $\delta$  9.84 (s, 1H), 7.57 (m, 2H), 7.41 (m, 3H), 5.98 (s, 1H), 5.30 (t,  $J = 0.9$  Hz, 1H), 5.11 (p,  $J = 1.4$  Hz, 1H), 2.56 (tddd,  $J = 8.8, 7.5, 6.4, 1.7$  Hz, 1H), 2.49 – 2.34 (m, 2H), 2.05 (m, 1H), 1.87 (dd,  $J = 1.5, 0.7$  Hz, 3H), 1.59 (m, 1H), 1.20 (d,  $J = 7.6$  Hz, 3H).

$^{13}\text{C}$  NMR (101 MHz,  $\text{CDCl}_3$ ):  $\delta$  200.7, 142.6, 136.2, 129.8, 128.4, 126.7, 114.5, 104.6, 97.4, 97.3, 43.5, 35.9, 31.9, 20.5, 14.5.

FTIR ( $\text{NaCl}$ , thin film): 2965, 2875, 1733, 1456, 1398, 1312, 1221, 1133, 1087, 1060, 1026  $\text{cm}^{-1}$ .

HRMS (MM:ESI-APCI): calc'd for  $[\text{M}]^+$  272.1407, found 272.1405.

$[\alpha]_{\text{D}}^{25} = -31^\circ$  ( $c = 0.285$ ,  $\text{CHCl}_3$ ).

**Figure S2.** Progression of Stahl's Cu-catalyzed aerobic oxidation of alcohol **17**.

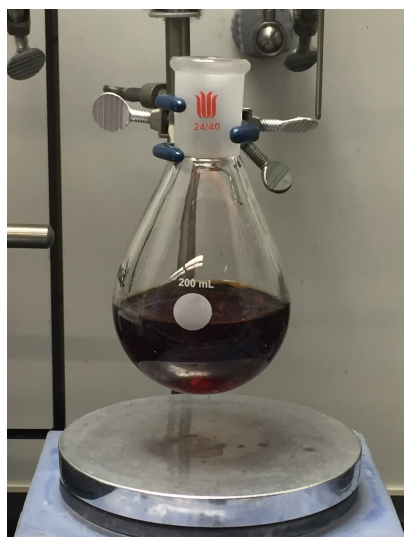

**A.**  $t = 0$  h (rxn start)

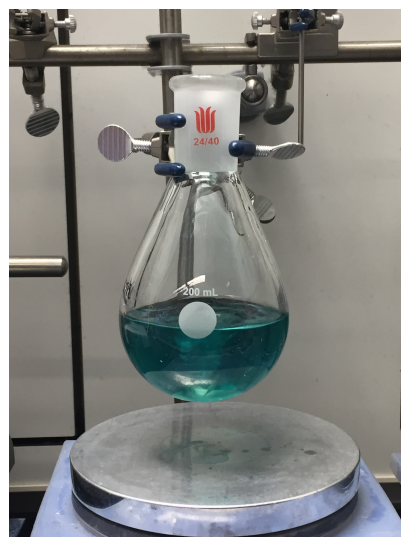

**B.**  $t = 1.75$  h (rxn end)

### Preparation of isopropyl ester **21**

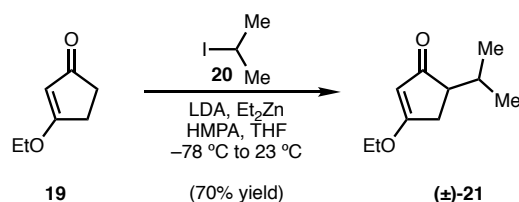

An oven-dried, 500 mL round-bottomed flask was treated with freshly distilled *i*-Pr<sub>2</sub>NH (6.4 mL, 45.6 mmol, 1.15 equiv) and anhydrous THF (45 mL). The solution was cooled to 0 °C via an ice/water bath and stirring was continued for 15 min prior to the dropwise addition of *n*-BuLi (2.5 M in hexanes, 17 mL, 43.6 mmol, 1.1 equiv) via syringe. Upon complete addition, the reaction was continued for 30 min to produce LDA, which was then further cooled to -78 °C via a dry ice/acetone bath. To the cooled solution was added vinyllogous ester **19** (5.00 g, 39.6 mmol, 1.0 equiv) in anhydrous THF (45 mL) dropwise via cannula over 10 min at -78 °C. The reaction was continued at -78 °C for 45 min prior to the dropwise addition of Et<sub>2</sub>Zn (1.0 M in hexanes, 42 mL, 41.6 mmol, 1.05 equiv) via syringe [Note: rapid generation of ethane (g) is observed, care should be taken to avoid overpressurization]. The reaction was continued for 5 min at -78 °C before adding in quick succession 2-iodopropane (20 mL, 198 mmol, 5.0 equiv) and anhydrous HMPA (31 mL, 178 mmol, 4.5 equiv) via syringe. The reaction flask was immediately removed from the cooling bath and stirring continued at ambient temperature overnight (*ca.* 18-20 h) at which point TLC analysis indicated the complete consumption of starting material. The reaction was recooled to 0 °C via an ice/water bath and *carefully* quenched with sat. aq. NH<sub>4</sub>Cl (80 mL). The mixture was warmed to ambient temperature, diluted with Et<sub>2</sub>O (40 mL), and the layers were separated. The

aqueous layer was extracted with Et<sub>2</sub>O (2 × 80 mL) and the combined organic layers were washed with sat. aq. NH<sub>4</sub>Cl (80 mL), brine (80 mL), dried over Na<sub>2</sub>SO<sub>4</sub>, filtered, and concentrated *in vacuo*. The crude residue was purified via SiO<sub>2</sub> flash chromatography (20 to 30 to 40 to 50% EtOAc/hexanes) to afford isopropyl ester **21** (4.67 g, 27.7 mmol, 70% yield) as a yellow-orange oil.

**TLC (30% EtOAc/hexanes):** R<sub>f</sub> 0.42 (UV, *p*-anisaldehyde).

**<sup>1</sup>H NMR (400 MHz, CDCl<sub>3</sub>):** δ 5.24 (s, 1H), 4.03 (qd, *J* = 7.1, 1.1 Hz, 2H), 2.55 (ddd, *J* = 17.2, 7.3, 1.2 Hz, 1H), 2.47 (ddd, *J* = 7.2, 4.1, 2.6 Hz, 1H), 2.35 (ddd, *J* = 17.3, 2.6, 1.1 Hz, 1H), 2.27 (pd, *J* = 6.9, 4.1 Hz, 1H), 1.40 (t, *J* = 7.1 Hz, 3H), 0.96 (d, *J* = 6.9 Hz, 3H), 0.78 (d, *J* = 6.8 Hz, 3H).

**<sup>13</sup>C NMR (101 MHz, CDCl<sub>3</sub>):** δ 207.9, 189.3, 104.9, 67.5, 50.8, 30.3, 28.1, 20.7, 16.5, 14.1.

**FTIR (NaCl, thin film):** 2958, 2873, 1693, 1594, 1466, 1338, 1029 cm<sup>-1</sup>.

**HRMS (ESI):** calc'd for [M+Na]<sup>+</sup> 191.1043, found 191.1061.

### Preparation of iodoester **22**

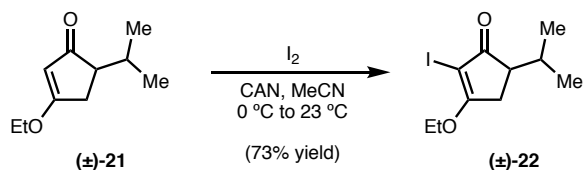

An oven-dried, 500 mL round-bottomed flask was charged with vinylogous ester **21** (4.60 g, 27.3 mmol, 1.0 equiv) and anhydrous MeCN (180 mL). The solution was cooled to 0 °C via an ice/water bath and stirring was continued for 15 min prior to the addition of I<sub>2</sub> (7.29 g, 28.7 mmol, 1.05 equiv) then CAN (15.7 g, 28.7 mmol, 1.05 equiv) in quick succession. The reaction mixture was immediately removed from the ice/water bath and the reaction was continued for 0.5 h at ambient temperature, during which time CAN slowly solubilizes resulting in a deep red-black solution. After 0.5 h, TLC analysis indicated the complete consumption of starting material. The reaction mixture was recooled to 0 °C via an ice/water bath and *carefully* quenched with the addition of sat. aq. Na<sub>2</sub>S<sub>2</sub>O<sub>3</sub> (60 mL) [Note: vigorous evolution of HI is observed at the initial stages of the quench]. The resulting biphasic mixture was diluted with EtOAc (60 mL) and the layers were separated. The aqueous layer was extracted with EtOAc (2 × 80 mL) and the combined organic layers were washed with brine (80 mL), dried over Na<sub>2</sub>SO<sub>4</sub>, filtered, and concentrated *in vacuo*. The crude residue was purified via SiO<sub>2</sub> flash chromatography (20 to 35% EtOAc/hexanes) to afford iodoester **22** (5.87 g, 20.0 mmol, 73% yield) as a yellow-orange solid.



**TLC (30% EtOAc/hexanes):**  $R_f$  0.32 (UV, *p*-anisaldehyde).

**$^1\text{H}$  NMR (400 MHz,  $\text{CDCl}_3$ ):**  $\delta$  4.36 (q,  $J = 7.1$  Hz, 2H), 2.80 (dd,  $J = 17.5, 7.1$  Hz, 1H), 2.65 (dd,  $J = 7.0, 4.2, 2.5$  Hz, 1H), 2.54 (dd,  $J = 17.4, 2.5$  Hz, 1H), 2.30 (pd,  $J = 6.9, 4.1$  Hz, 1H), 1.45 (t,  $J = 7.1$  Hz, 3H), 0.95 (d,  $J = 7.0$  Hz, 3H), 0.75 (d,  $J = 6.8$  Hz, 3H).

**$^{13}\text{C}$  NMR (101 MHz,  $\text{CDCl}_3$ ):**  $\delta$  201.5, 188.1, 73.9, 66.5, 49.8, 29.4, 28.6, 20.2, 16.6, 15.1.

**FTIR (NaCl, thin film):** 2956, 1678, 1574, 1345, 1336, 1285, 1264 1046  $\text{cm}^{-1}$ .

**HRMS (ESI):** calc'd for  $[\text{M}+\text{Na}]^+$  317.0009, found 317.0008.

### Preparation of iodobromoeneone **24**

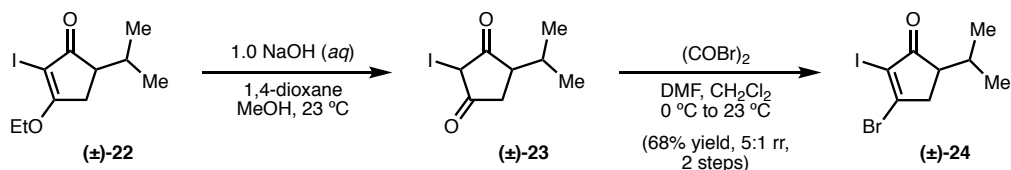

A 500 mL round-bottomed flask was treated with iodoester **22** (6.06 g, 20.6 mmol, 1.0 equiv), 1,4-dioxane (82 mL), MeOH (82 mL), and *then* 1.0 M NaOH (*aq*) (82 mL, 82.4 mmol, 10 equiv). The resulting deep brown reaction mixture was stirred at ambient temperature for 3 h, at which point TLC and LCMS indicated the complete consumption of starting material. The reaction was quenched with the addition 1.0 M HCl (*aq*) (100 mL) and diluted with 10% *i*-PrOH/ $\text{CHCl}_3$  (100 mL). The layers were separated and the aqueous layer was repeatedly extracted with 10% *i*-PrOH/ $\text{CHCl}_3$  (100 mL) until TLC analysis of the aqueous layer indicated that absence of the intermediate diketone. The combined organic layers were washed with brine (150 mL), filtered over Celite, and concentrated *in vacuo*. The crude residue was purified via  $\text{SiO}_2$  flash chromatography (5/1 to 10/1 to 12/1% MeOH/ $\text{Et}_3\text{N}/\text{CHCl}_3$ ) to afford intermediate iododiketone **23** as a dark brown semi-solid [Note: iododiketone **23** is *not* stable to storage and was used immediately upon isolation].

In an oven-dried, 500 mL round-bottomed flask, the intermediate iododiketone **23** was immediately taken up in anhydrous  $\text{CH}_2\text{Cl}_2$  (200 mL) and cooled to 0 °C via an ice/water bath. Anhydrous DMF (4.8 mL, 61.8 mmol, 3.0 equiv) was next added and stirring continued for 15 min at 0 °C before the dropwise addition of oxalyl bromide (2.9 mL, 30.9 mmol, 1.5 equiv) via syringe [Caution! Rapid generation of CO and  $\text{CO}_2$ . A vent needle was routinely used during this addition to prevent over-pressurization.]. Upon complete addition, the ice/water bath was removed and stirring was continued for 1 h before pouring the reaction mixture over  $\text{CH}_2\text{Cl}_2$  (50 mL) and ice-cold  $\text{H}_2\text{O}$  (100 mL). The layers were separated and the aqueous layer was extracted with  $\text{CH}_2\text{Cl}_2$  (3 × 80 mL). The combined organic layers were washed with sat. aq.  $\text{Na}_2\text{S}_2\text{O}_3$  (150 mL), dried over  $\text{MgSO}_4$ , filtered, and concentrated *in vacuo*. The crude residue was purified via  $\text{SiO}_2$  flash chromatography (7.5 to 10 to 15%  $\text{Et}_2\text{O}/\text{hexanes}$ ) to afford iodobromocyclopentenone (±)-**24** (4.60 g, 14.0 mmol, 68% yield) as a yellow oil that solidifies upon storage at -20 °C. The regioselectivity was confirmed by HMBC analysis.

**TLC (10% Et<sub>2</sub>O/hexanes):** R<sub>f</sub> 0.36 (UV, KMnO<sub>4</sub>).

**<sup>1</sup>H NMR (400 MHz, CDCl<sub>3</sub>):** δ 3.06 (dd, *J* = 18.6, 7.1 Hz, 1H), 2.83 (dd, *J* = 18.6, 2.6 Hz, 1H), 2.72 (ddd, *J* = 7.0, 4.4, 2.5 Hz, 1H), 2.29 (pd, *J* = 6.9, 4.4 Hz, 1H), 0.98 (d, *J* = 6.9 Hz, 3H), 0.81 (d, *J* = 6.9 Hz, 3H).

**<sup>13</sup>C NMR (101 MHz, CDCl<sub>3</sub>):** δ 202.0, 165.7, 108.3, 52.2, 40.5, 29.2, 20.1, 17.2.

**FTIR (NaCl, thin film):** 2956, 2359, 1704, 1568, 1456, 1187 cm<sup>-1</sup>.

**HRMS (ESI):** calc'd for [M+H]<sup>+</sup> 328.9032, found 328.9024.

### Preparation of enriched alcohol (–)-27

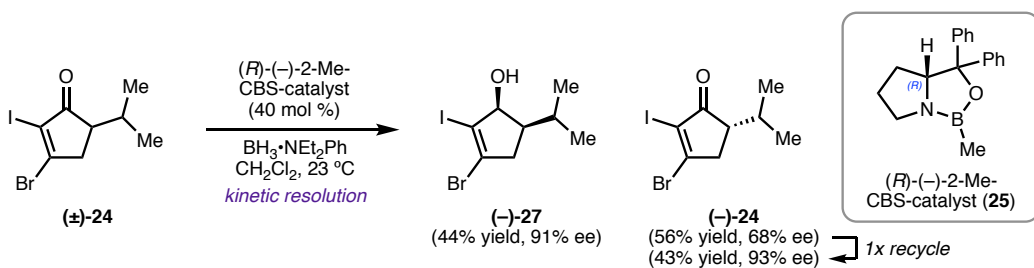

An oven-dried, 100 mL round-bottomed flask was charged with (*R*)-(+)-2-Me-CBS-oxazaborolidine (337 mg, 1.22 mmol, 0.4 equiv) and anhydrous CH<sub>2</sub>Cl<sub>2</sub> (25 mL). After 15 min of continued stirring, BH<sub>3</sub>•NEt<sub>2</sub>Ph (373 μL, 2.13 mmol, 0.7 equiv) was added dropwise via microsyringe. The reaction mixture was stirred an additional 10 min at ambient temperature before adding cyclopentenone (±)-24 (1 g, 3.04 mmol, 1.0 equiv) in anhydrous CH<sub>2</sub>Cl<sub>2</sub> (22 mL) dropwise over 1 h via syringe pump before another portion of CH<sub>2</sub>Cl<sub>2</sub> (3.0 mL) was used to render the transfer quantitative. Upon complete addition, the reaction progress was closely monitored by analytical SFC analysis. The reaction mixture was allowed to continue for an additional 3 h 20 min before it was diluted with Et<sub>2</sub>O (20 mL) and quenched with the *careful* addition of MeOH (5 mL) followed by H<sub>2</sub>O (20 mL). The layers were separated and the aqueous layer was extracted with Et<sub>2</sub>O (2 × 30 mL). The combined organic layers were washed with brine (40 mL), dried over MgSO<sub>4</sub>, filtered, and concentrated *in vacuo*. The crude residue was purified via SiO<sub>2</sub> flash chromatography (7.5 to 10 to 12.5% Et<sub>2</sub>O/hexanes) to afford cyclopentenol (–)-27 (442 mg, 1.34 mmol, 44% yield, 91% ee) as a white solid. The ee was determined by SFC analysis (**27**: AD-H, 2.5 mL/min, 15% IPA in CO<sub>2</sub>, λ = 254 nm; **24**: AD-H, 2.5 mL/min, 10% IPA in CO<sub>2</sub>, λ = 254 nm).

Unreacted cyclopentenone (–)-24 was recovered as a yellow oil (555 mg, 1.69 mmol, 56% yield, 68% ee) and can be further enriched to 93% ee through the following procedure (79% recovery, 43% yield over 2 steps): An oven-dried, 50 mL round-bottomed flask was charged with (*R*)-(+)-2-Me-CBS-oxazaborolidine (94 mg, 0.34 mmol, 0.2 equiv) and anhydrous CH<sub>2</sub>Cl<sub>2</sub> (18 mL). After 15 min of continued stirring, BH<sub>3</sub>•NEt<sub>2</sub>Ph (270 μL, 1.52 mmol, 0.9 equiv) was added dropwise via microsyringe. The reaction mixture was stirred an additional 10 min at ambient temperature before adding cyclopentenone (–)-24 (555 mg, 1.69 mmol, 68% ee, 1.0 equiv) in anhydrous

CH<sub>2</sub>Cl<sub>2</sub> (7 mL) dropwise over 1 h via syringe pump before another portion of CH<sub>2</sub>Cl<sub>2</sub> (3.0 mL) was used to render the transfer quantitative. Upon complete addition, the reaction progress was closely monitored by analytical SFC analysis. The reaction mixture was allowed to continue for an additional 3 h before it was diluted with Et<sub>2</sub>O (10 mL) and quenched with the *careful* addition of MeOH (5 mL) followed by H<sub>2</sub>O (10 mL). The layers were separated and the aqueous layer was extracted with Et<sub>2</sub>O (2 × 15 mL). The combined organic layers were washed with brine (20 mL), dried over MgSO<sub>4</sub>, filtered, and concentrated *in vacuo*. The crude residue was purified via SiO<sub>2</sub> flash chromatography (7.5 to 10% Et<sub>2</sub>O/hexanes) to afford cyclopentenone (–)-**24** (435 mg, 1.34 mmol, 79% recovery, 93% ee) as a yellow oil ( $[\alpha]_D^{25} = -53^\circ$  ( $c = 1.00$ , CHCl<sub>3</sub>)).

The selectivity factor (or *S* factor) was determined in a 15 mg scale experiment run under otherwise identical conditions as above using benzyl ether as an internal standard: at 19.6% conversion, (–)-**27** was of 94.5% ee and unreacted (–)-**24** was of 23.1% ee; the *S* factor was accordingly calculated to be 44.

**TLC (15% Et<sub>2</sub>O/hexanes):** R<sub>f</sub> 0.37 (UV, *p*-anisaldehyde).

**<sup>1</sup>H NMR (400 MHz, CDCl<sub>3</sub>):** δ 4.50 (td, *J* = 6.2, 1.7 Hz, 1H), 2.60 (dd, *J* = 16.1, 7.7 Hz, 1H), 2.52 (ddd, *J* = 16.2, 8.4, 1.7 Hz, 1H), 2.00 (dddd, *J* = 10.8, 8.4, 7.8, 6.0 Hz, 1H), 1.89 (dp, *J* = 10.8, 6.4 Hz, 1H), 1.68 (d, *J* = 6.3 Hz, 1H, OH), 1.02 (d, *J* = 6.3, 3H), 0.93 (d, *J* = 6.6 Hz, 3H).

**<sup>13</sup>C NMR (101 MHz, CDCl<sub>3</sub>):** δ 136.6, 102.6, 82.1, 51.0, 42.9, 27.8, 21.4, 21.0.

**FTIR (NaCl, thin film):** 3330, 2956, 2869, 1598, 1241, 1096, 1065, 1011 cm<sup>-1</sup>.

**HRMS (ESI):** calc'd for [M]<sup>+</sup> 329.9111, found 329.9116.

$[\alpha]_D^{25} = -11^\circ$  ( $c = 1.19$ , CHCl<sub>3</sub>).

**Figure S3.** SFC traces of racemic and enantioenriched alcohol **27**.

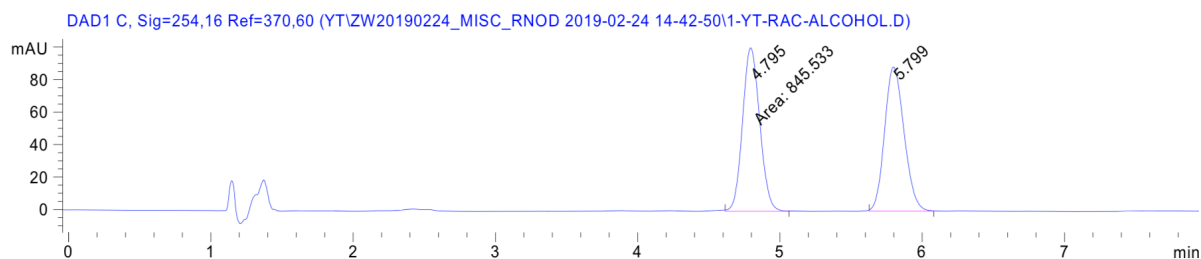

| Peak # | RetTime [min] | Type | Width [min] | Area [mAU*s] | Height [mAU] | Area %  |
|--------|---------------|------|-------------|--------------|--------------|---------|
| 1      | 4.795         | MM   | 0.1396      | 845.53265    | 100.94398    | 49.9669 |
| 2      | 5.799         | BB   | 0.1475      | 846.65253    | 88.58824     | 50.0331 |

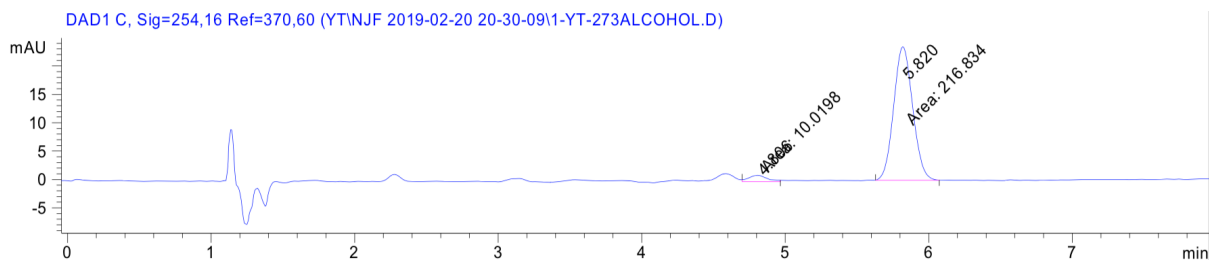

| Peak # | RetTime [min] | Type | Width [min] | Area [mAU*s] | Height [mAU] | Area %  |
|--------|---------------|------|-------------|--------------|--------------|---------|
| 1      | 4.806         | MM   | 0.1496      | 10.01976     | 1.11640      | 4.4168  |
| 2      | 5.820         | MM   | 0.1533      | 216.83441    | 23.57370     | 95.5832 |

**Figure S4.** SFC traces of racemic and enantioenriched enone **24**.

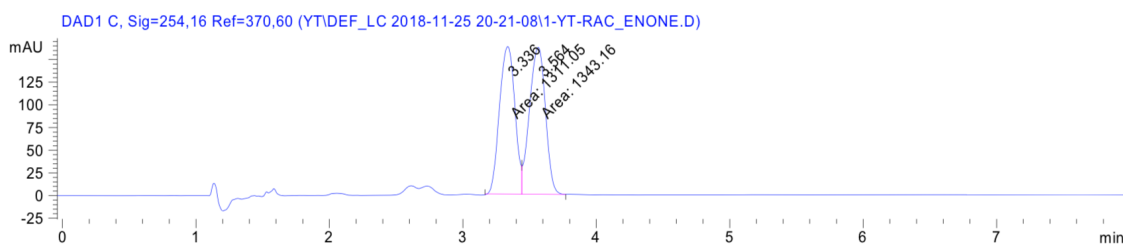

| Peak # | RetTime [min] | Type | Width [min] | Area [mAU*s] | Height [mAU] | Area %  |
|--------|---------------|------|-------------|--------------|--------------|---------|
| 1      | 3.336         | MF   | 0.1338      | 1311.04724   | 163.25740    | 49.3950 |
| 2      | 3.564         | FM   | 0.1377      | 1343.16089   | 162.60211    | 50.6050 |

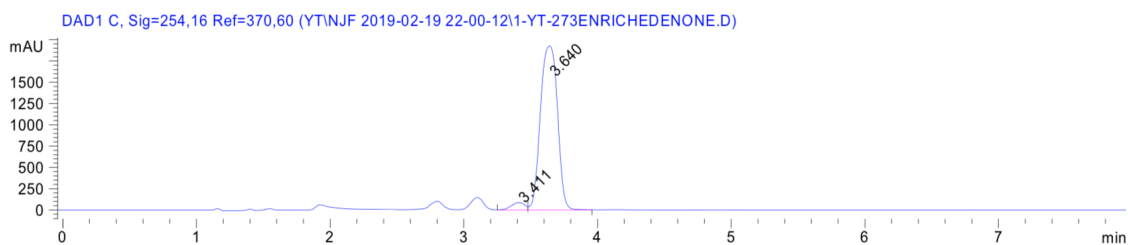

| Peak # | RetTime [min] | Type | Width [min] | Area [mAU*s] | Height [mAU] | Area %  |
|--------|---------------|------|-------------|--------------|--------------|---------|
| 1      | 3.411         | VV   | 0.1151      | 642.59912    | 90.20612     | 3.6092  |
| 2      | 3.640         | VB   | 0.1479      | 1.71620e4    | 1927.05969   | 96.3908 |

## Preparation of PMB ether 29

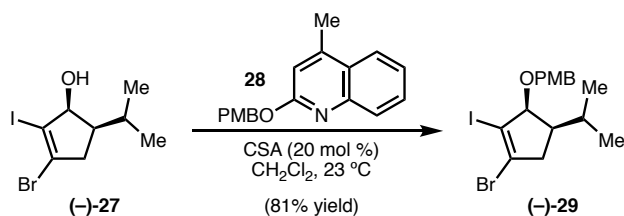

An oven-dried, 500 mL round-bottomed flask was charged with alcohol (–)-**27** (2.66 g, 8.03 mmol, 1.0 equiv), 2-(4-methoxybenzyloxy)-4-methylquinoline<sup>4-5</sup> (4.49 g, 16.1 mmol, 2.0 equiv), and anhydrous CH<sub>2</sub>Cl<sub>2</sub> (80 mL). The solution was treated with (±)-10-camphorsulfonic acid (373 mg, 1.61 mmol, 0.20 equiv) and the suspension was vigorously stirred at ambient temperature under Ar for 36 h. The reaction mixture was *carefully* treated with sat. aq. NaHCO<sub>3</sub> (20 mL), diluted with Et<sub>2</sub>O (80 mL), and the layers were separated. The aqueous layer was extracted with Et<sub>2</sub>O (2 × 40 mL) and the combined organic layers were washed with 1 N HCl (aq) (3 × 60 mL), brine (60 mL), dried over MgSO<sub>4</sub>, filtered, and concentrated *in vacuo* [Note: the 1 N HCl (aq) washes were deemed imperative for the efficient removal of the 2-lepidone byproduct]. The crude residue was purified via SiO<sub>2</sub> flash chromatography (2/2 to 3/3 to 4/4% Et<sub>2</sub>O/CH<sub>2</sub>Cl<sub>2</sub>/hexanes) to afford PMB ether (–)-**29** (2.94 g, 6.51 mmol, 81% yield) as a thick colorless oil that solidifies to a white solid upon storage at –20 °C. The stereochemistry was confirmed by nOe analysis.

**TLC (15% Et<sub>2</sub>O/hexanes):** R<sub>f</sub> 0.67 (UV, *p*-anisaldehyde).

**<sup>1</sup>H NMR (400 MHz, CDCl<sub>3</sub>):** δ 7.29 (m, 2H), 6.88 (m, 2H), 4.89 (d, *J* = 10.5 Hz, 1H), 4.56 (d, *J* = 10.5 Hz, 1H), 4.38 (dd, *J* = 6.0, 1.4 Hz, 1H), 3.80 (s, 3H), 2.60 (ddd, *J* = 16.2, 8.5, 1.5 Hz, 1H), 2.54 (dd, *J* = 16.0, 7.5 Hz, 1H), 2.13 – 1.91 (m, 2H), 0.97 (d, *J* = 6.2 Hz, 3H), 0.91 (d, *J* = 6.5 Hz, 3H).

**<sup>13</sup>C NMR (101 MHz, CDCl<sub>3</sub>):** δ 159.2, 137.3, 130.4, 129.3, 113.8, 98.3, 88.0, 72.5, 55.3, 52.2, 43.2, 27.3, 21.5, 20.8.

**FTIR (NaCl, thin film):** 2956, 2869, 1614, 1514, 1248 cm<sup>-1</sup>.

**HRMS (ESI):** calc'd for [M+H<sub>2</sub>O]<sup>+</sup> 467.9792, found 467.9807.

**[α]<sub>D</sub><sup>25</sup>** = –29° (*c* = 0.650, CHCl<sub>3</sub>).

## Convergent union of aldehyde **18** and iodobromocyclopentenol **29**

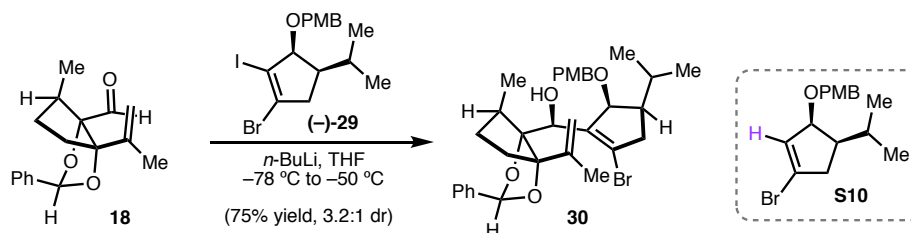

An oven-dried, 100 mL round-bottomed flask was charged with vinyl iodide **(-)-29** (2.24 g, 4.96 mmol, 1.25 equiv) and anhydrous THF (18 mL) [Note: vinyl iodide **(-)-29** was azeotroped with PhH three times immediately prior to use]. The solution was cooled to  $-78\text{ }^{\circ}\text{C}$  via a dry ice/acetone bath and stirring continued for 15 min prior to the dropwise addition of  $n\text{-BuLi}$  (2.5 M in hexanes, 2.0 mL, 4.96 mmol, 1.25 equiv) via syringe. Upon complete addition, the reaction mixture was stirred an additional 15 min. Aldehyde **18** (1.08 g, 3.97 mmol, 1.0 equiv) in anhydrous THF (18 mL) was added dropwise via cannula over 15 min [Note: aldehyde **18** was azeotroped with PhH three times immediately prior to use], before another portion of THF (3 mL) was used to render the transfer quantitative. Immediately upon complete addition of aldehyde **18**, the reaction mixture was slowly warmed to  $-50\text{ }^{\circ}\text{C}$  over 15 min and the reaction was continued at  $-50\text{ }^{\circ}\text{C}$  until TLC analysis indicated the complete consumption of starting material (*ca.* 30 min). The reaction mixture was quenched with the addition of sat. aq.  $\text{NH}_4\text{Cl}$  (10 mL) and then warmed to ambient temperature and diluted with  $\text{Et}_2\text{O}$  (10 mL). The layers were separated and the aqueous layer was extracted with  $\text{Et}_2\text{O}$  ( $3 \times 15\text{ mL}$ ). The combined organic layers were washed with brine (15 mL), dried over  $\text{MgSO}_4$ , filtered, and concentrated *in vacuo*.  $^1\text{H}$  NMR analysis of the crude product indicated that the reaction occurs with full consumption of the starting material in a 3.2:1 diastereomeric ratio. Repeated purification via  $\text{SiO}_2$  flash chromatography (5/5 to 10/5 to 15/5%  $\text{Et}_2\text{O}/\text{CH}_2\text{Cl}_2/\text{hexanes}$ ) afforded a single diastereomer of alcohol **30** (1.78 g, 2.97 mmol, 75% yield) as a white foam.

**TLC (10/5%  $\text{Et}_2\text{O}/\text{CH}_2\text{Cl}_2/\text{hexanes}$ ):**  $R_f$  0.32 (UV, *p*-anisaldehyde).

**$^1\text{H}$  NMR (400 MHz,  $\text{CDCl}_3$ ):**  $\delta$  7.67 – 7.63 (m, 2H), 7.42 – 7.36 (m, 3H), 7.05 – 6.99 (m, 2H), 6.79 – 6.74 (m, 2H), 6.37 (s, 1H), 5.32 (d,  $J = 0.8\text{ Hz}$ , 1H), 5.20 (t,  $J = 1.5\text{ Hz}$ , 1H), 4.95 (d,  $J = 4.0\text{ Hz}$ , 1H), 4.65 (d,  $J = 4.6\text{ Hz}$ , 1H), 4.46 (d,  $J = 9.6\text{ Hz}$ , 1H), 4.40 (d,  $J = 9.6\text{ Hz}$ , 1H), 3.78 (s, 3H), 2.78 (ddd,  $J = 15.8, 9.5, 0.8\text{ Hz}$ , 1H), 2.44 (p,  $J = 7.0\text{ Hz}$ , 1H), 2.39 (dd,  $J = 15.8, 7.0\text{ Hz}$ , 1H), 2.27 (dq,  $J = 12.3, 6.3\text{ Hz}$ , 1H), 2.18 – 2.12 (m, 2H), 2.11 (d,  $J = 1.1\text{ Hz}$ , 3H), 1.99 (dd,  $J = 13.4, 6.3\text{ Hz}$ , 1H), 1.87 (tdd,  $J = 9.7, 7.0, 4.6\text{ Hz}$ , 1H), 1.23 (dd,  $J = 11.9, 6.0\text{ Hz}$ , 1H), 1.09 (d,  $J = 6.4\text{ Hz}$ , 3H), 0.96 (d,  $J = 6.7\text{ Hz}$ , 3H), 0.88 (d,  $J = 7.5\text{ Hz}$ , 3H).

**$^{13}\text{C}$  NMR (101 MHz,  $\text{CDCl}_3$ ):**  $\delta$  158.7, 148.1, 142.6, 138.0, 131.2, 129.7, 129.6, 129.4, 128.4, 126.9, 113.3, 112.6, 105.0, 99.1, 96.7, 80.5, 72.4, 71.3, 55.2, 55.0, 41.8, 41.4, 38.8, 30.6, 26.0, 23.0, 21.3, 14.1.

**FTIR (NaCl, thin film):** 3498, 2956, 2871, 1613, 1514, 1248, 1064, 1029  $\text{cm}^{-1}$ .

**HRMS (ESI):** calc'd for  $[M+NH_4]^+$  614.2476, found 614.2470.

$[\alpha]_D^{25} = +70^\circ$  ( $c = 1.575$ ,  $CHCl_3$ ).

#### deiodination byproduct **S10**:

**$^1H$  NMR (400 MHz,  $CDCl_3$ ):**  $\delta$  7.26 – 7.22 (m, 2H), 6.91 – 6.76 (m, 2H), 6.19 (td,  $J = 2.5, 1.2$  Hz, 1H), 4.47 (d,  $J = 11.1$  Hz, 1H), 4.34 (d,  $J = 11.2$  Hz, 1H), 4.23 (d,  $J = 5.9, 2.4, 1.6$  Hz, 1H), 3.80 (s, 3H), 2.60 (dddd,  $J = 16.1, 8.4, 2.5, 1.6$  Hz, 1H), 2.48 (ddd,  $J = 16.2, 7.4, 1.2$  Hz, 1H), 2.09 – 1.79 (m, 2H), 0.97 (d,  $J = 6.0$  Hz, 3H), 0.91 (d,  $J = 6.3$  Hz, 3H).

**$^{13}C$  NMR (101 MHz,  $CDCl_3$ ):**  $\delta$  159.1, 131.5, 130.7, 129.6, 129.1, 113.7, 81.2, 70.4, 55.3, 51.9, 43.2, 27.2, 21.5, 21.3.

**HRMS (ESI):** calc'd for  $[M+H_2O]^+$  342.0825, found 342.0848.

#### Preparation of lactone **31**

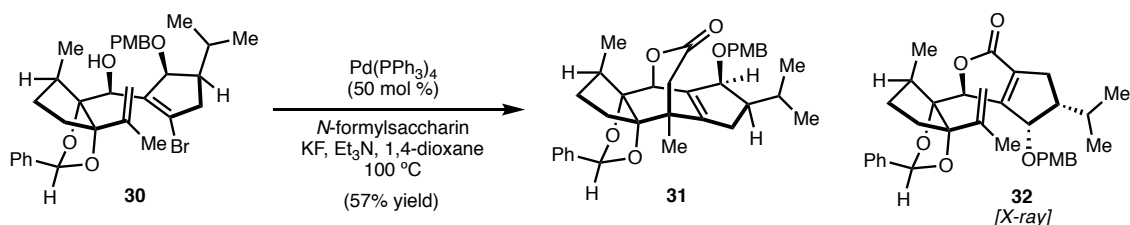

In a nitrogen-filled glovebox, an oven-dried, 500 mL heavy-walled pressure vessel equipped with a magnetic stirbar was charged with  $Pd(PPh_3)_4$  (387 mg, 0.33 mmol, 50 mol %), *N*-formylsaccharin (170 mg, 0.80 mmol, 1.2 equiv). Vinyl bromide **30** (400 mg, 0.67 mmol, 1.0 equiv) in anhydrous 1,4-dioxane (67 mL) was carefully transferred into the reaction vessel using a glass pipette. The suspension was treated with triethylamine (0.37 mL, 2.68 mmol, 4.0 equiv) and KF (97 mg, 1.67 mmol, 2.5 equiv) before the vessel was sealed with a CAPFE O-ring lined cap, removed from the glove box, and submerged in a preheated oil bath at 100 °C. [Note: running the reaction at 0.01 M concentration, having a reaction solvent volume to vessel volume ratio less than 1:7, and maintaining the oil bath at 100 °C throughout the reaction are critical]. Within 15 min, the reaction mixture turned dark green. After 26 h of continued stirring at 100 °C, the reaction mixture was cooled to ambient temperature, diluted with  $Et_2O$  (30 mL), and filtered through a pre-equilibrated  $SiO_2$  pad layered with Celite. The orange filtrate was concentrated *in vacuo* and the crude residue was directly purified via  $SiO_2$  flash chromatography (10 to 15 to 20%  $EtOAc$ /hexanes). The concentrated column fractions were treated with  $Et_2O$  (10 mL) and filtered through a pad of Celite. The filtrate was finally concentrated *in vacuo* to afford tetracycle **31** (207 mg, 0.38 mmol, 57% yield) as a yellow foam.

**TLC (30% EtOAc/hexanes):**  $R_f$  0.71 (UV, *p*-anisaldehyde).

**$^1\text{H}$  NMR (400 MHz,  $\text{CDCl}_3$ ):**  $\delta$  7.48 – 7.34 (m, 5H), 7.32 – 7.24 (m, 2H), 6.91 – 6.82 (m, 2H), 5.65 (s, 1H), 5.06 (s, 1H), 4.64 (d,  $J = 10.5$  Hz, 1H), 4.43 (d,  $J = 10.5$  Hz, 1H), 4.43 (d,  $J = 6.3$  Hz, 1H), 3.79 (s, 3H), 2.78 (d,  $J = 19.3$  Hz, 1H), 2.68 (d,  $J = 19.3$  Hz, 1H), 2.55 (dt,  $J = 13.0, 7.1$  Hz, 1H), 2.49 (d,  $J = 7.9$  Hz, 2H), 2.23 (m, 1H), 2.16 (dd,  $J = 13.6, 7.1$  Hz, 1H), 2.10 – 1.94 (m, 2H), 1.85 (m, 1H), 1.49 (m, 1H), 1.31 (s, 3H), 1.30 (d,  $J = 7.3$  Hz, 3H), 1.04 (d,  $J = 6.4$  Hz, 3H), 0.97 (d,  $J = 6.7$  Hz, 3H).

**$^{13}\text{C}$  NMR (101 MHz,  $\text{CDCl}_3$ ):**  $\delta$  170.3, 159.1, 157.1, 139.9, 137.9, 130.5, 129.7, 129.5, 128.5, 126.6, 113.7, 109.5, 97.8, 95.7, 83.5, 72.3, 71.1, 55.2, 53.1, 45.1, 45.0, 40.2, 35.2, 34.8, 32.9, 27.3, 21.9, 21.4, 19.1, 13.0.

**FTIR (NaCl, thin film):** 2958, 1727, 1514, 1249, 1034  $\text{cm}^{-1}$ .

**HRMS (ESI):** calc'd for  $[\text{M}+\text{Na}]^+$  567.2717, found 567.2716.

$[\alpha]_{\text{D}}^{25} = -5^\circ$  ( $c = 0.475$ ,  $\text{CHCl}_3$ ).

**premature carbonylation side product 32:**

**TLC (20% EtOAc/hexanes):**  $R_f$  0.42 (UV, *p*-anisaldehyde).

**$^1\text{H}$  NMR (400 MHz,  $\text{CDCl}_3$ ):**  $\delta$  7.49 – 7.47 (m, 2H), 7.37 – 7.35 (m, 3H), 7.18 – 7.14 (m, 2H), 6.88 – 6.85 (m, 2H), 5.87 (s, 1H), 5.12 (s, 1H), 5.01 (s, 1H), 4.92 (s, 1H), 4.83 – 4.81 (m, 1H), 4.47 (d,  $J = 11.1$  Hz, 1H), 4.32 (d,  $J = 11.1$  Hz, 1H), 3.81 (s, 3H), 2.61 – 2.55 (m, 1H), 2.48 – 2.27 (m, 4H), 2.25 – 2.12 (m, 2H), 1.47 – 1.43 (m, 1H), 1.14 (d,  $J = 4.1$  Hz, 3H), 1.09 (d,  $J = 6.4$  Hz, 3H), 0.97 (d,  $J = 6.6$  Hz, 3H).

**$^{13}\text{C}$  NMR (101 MHz,  $\text{CDCl}_3$ ):**  $\delta$  170.169.0, 159.4, 147.5, 143.5, 136.9, 130.3, 129.9, 129.1, 128.6, 127.1, 114.0, 112.7, 105.3, 96.9, 95.6, 82.4, 79.6, 70.0, 57.0, 55.4, 42.8, 40.2, 30.6, 29.4, 28.0, 22.2, 21.2, 14.2.

**FTIR (NaCl, thin film):** 2956, 1766, 1613, 1514, 1454  $\text{cm}^{-1}$ .

**HRMS (ESI):** calc'd for  $[\text{M}+\text{NH}_4]^+$  562.3163, found 562.3160.

$[\alpha]_{\text{D}}^{25} = -76^\circ$  ( $c = 0.500$ ,  $\text{CHCl}_3$ ).





## Preparation of alcohol 37

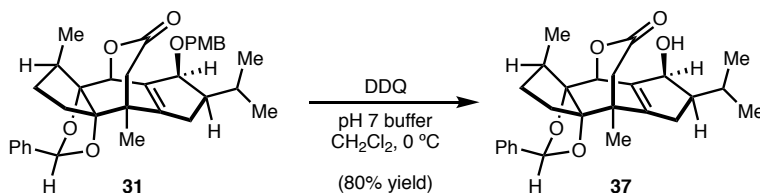

An oven-dried, 100 mL round-bottomed flask was charged with PMB ether **31** (1.11 g, 2.04 mmol, 1.0 equiv), CH<sub>2</sub>Cl<sub>2</sub> (55 mL), and pH 7 buffer (11 mL). The mixture was cooled to 0 °C via an ice/water bath and stirring was continued for 15 min prior to the addition of DDQ (555 mg, 2.45 mmol, 1.2 equiv) as a single portion. The reaction mixture quickly becomes a deep green suspension and vigorous stirring ( $\geq 800$  rpm) is continued for 40 min prior to the addition of another portion of DDQ (278 mg, 1.22 mmol, 0.6 equiv). The reaction was continued at 0 °C until TLC analysis indicated the complete consumption of the starting material (*ca.* 1.5 h). Sat. aq. NaHCO<sub>3</sub> (20 mL) was added and the mixture was diluted with CHCl<sub>3</sub> (10 mL) before the layers were separated [Note: the use of CHCl<sub>3</sub> over CH<sub>2</sub>Cl<sub>2</sub> proved advantageous in obtaining clear partitioning of the two layers]. The aqueous layer was extracted with CHCl<sub>3</sub> (3  $\times$  20 mL) and the combined organic layers were washed with brine (50 mL), dried over Na<sub>2</sub>SO<sub>4</sub>, filtered, and concentrated *in vacuo*. The crude residue was purified via SiO<sub>2</sub> flash chromatography (20 to 35 to 45% EtOAc/hexanes) to afford alcohol **37** (692 mg, 1.63 mmol, 80% yield) as a white foam.

**TLC (30% EtOAc/hexanes):**  $R_f$  0.24 (UV, *p*-anisaldehyde).

**<sup>1</sup>H NMR (400 MHz, CDCl<sub>3</sub>):**  $\delta$  7.42 – 7.33 (m, 5H), 5.65 (s, 1H), 5.13 (s, 1H), 4.72 (t,  $J = 6.1$  Hz, 1H), 2.78 (d,  $J = 19.3$  Hz, 1H), 2.67 (d,  $J = 19.3$  Hz, 1H), 2.55 (dd,  $J = 16.8, 7.1$  Hz, 1H), 2.53 (m, 1H), 2.41 (ddd,  $J = 17.1, 8.0, 1.9$  Hz, 1H), 2.28 – 2.10 (m, 2H), 2.01 (m, 1H), 1.93 – 1.76 (m, 2H), 1.43 (qd,  $J = 13.2, 7.4$  Hz, 1H), 1.32 (s, 3H), 1.28 (s, 3H), 1.09 (d,  $J = 6.2$  Hz, 3H), 1.01 (d,  $J = 6.4$  Hz, 3H).

**<sup>13</sup>C NMR (101 MHz, CDCl<sub>3</sub>):**  $\delta$  170.6, 155.7, 140.8, 137.9, 129.5, 128.5, 126.6, 109.5, 97.9, 95.7, 77.5, 71.9, 52.2, 44.9, 44.8, 40.2, 35.3, 34.4, 33.0, 27.6, 22.0, 21.5, 19.1, 13.0.

**FTIR (NaCl, thin film):** 3434, 2958, 1702, 1381, 1217, 1101, 1063, 1023 cm<sup>-1</sup>.

**HRMS (ESI):** calc'd for [M+Na]<sup>+</sup> 447.2142, found 447.2144.

$[\alpha]_D^{25} = +51^\circ$  ( $c = 0.165$ , CHCl<sub>3</sub>).

## Preparation of enone **38**

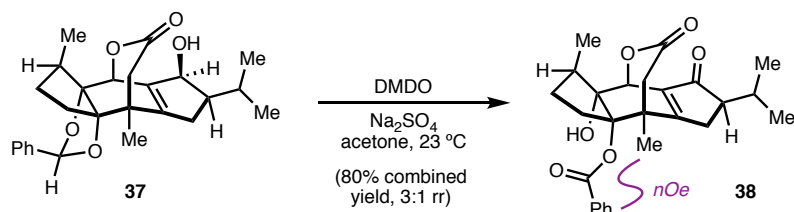

An oven-dried, 200 mL round-bottomed flask was charged with alcohol **37** (738 mg, 1.74 mmol, 1.0 equiv) and Na<sub>2</sub>SO<sub>4</sub> (1.48 g, 0.39 mmol, 200% w/w) before adding freshly generated DMDO<sup>6</sup> (0.08 M in acetone, 43 mL, 3.48 mmol, 2.0 equiv) at ambient temperature. The reaction was continued for 1 h with vigorous stirring (800 rpm) before an additional portion of DMDO (0.08 M in acetone, 22 mL, 1.74 mmol, 1.0 equiv) was added. After LCMS analysis indicated the complete consumption of starting material (*ca.* 2 h), the reaction mixture was diluted with CH<sub>2</sub>Cl<sub>2</sub> (20 mL) and filtered through a short pad of Celite. The filtrate was concentrated *in vacuo* and directly purified via SiO<sub>2</sub> flash chromatography (35 to 45 to 55% EtOAc/hexanes) to afford an inseparable regioisomeric mixture of hydroxybenzoate **38** (610 mg, 1.39 mmol, 80% combined yield, 3:1 rr) as a white foam [Note: attempts to purify the regioisomeric mixture by preparative HPLC and SFC were both unsuccessful] that was used in the next step without further purification. The regioselectivity of the major regioisomer (drawn) was confirmed by nOe analysis.

**TLC (40% EtOAc/hexanes):** R<sub>f</sub> 0.37 (UV, *p*-anisaldehyde).

**<sup>1</sup>H NMR (400 MHz, CDCl<sub>3</sub>):** δ 7.87 (d, *J* = 8.2 Hz, 2H), 7.59 (t, *J* = 7.4 Hz, 1H), 7.45 (t, *J* = 7.4 Hz, 2H), 5.09 (s, 1H), 3.02 (d, *J* = 19.4 Hz, 1H), 2.85 – 2.72 (m, 3H), 2.65 – 2.58 (m, 3H), 2.61 (d, *J* = 19.7 Hz, 1H), 2.32 (td, *J* = 7.0, 4.6 Hz, 1H), 2.22 (dd, *J* = 14.3, 7.7 Hz, 1H), 2.08 (m, 1H), 1.52 (s, 3H), 1.34 (d, *J* = 7.0 Hz, 3H), 1.20 (m, 1H), 1.03 (d, *J* = 6.9 Hz, 3H), 0.78 (d, *J* = 6.7 Hz, 3H).

**FTIR (NaCl, thin film):** 3453, 2960, 1728, 1704, 1694, 1276, 1114 cm<sup>-1</sup>.

**HRMS (ESI):** calc'd for [M+NH<sub>4</sub>]<sup>+</sup> 456.2381, found 456.2377.

## Preparation of alcohol **39**

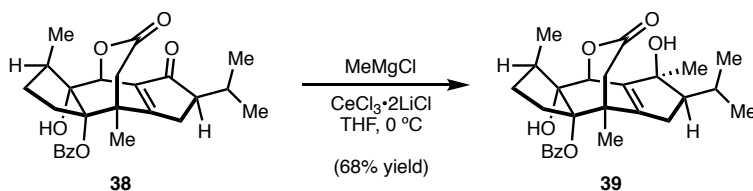

An oven-dried, 10 mL round-bottomed flask was charged with  $\text{CeCl}_3 \cdot 2\text{LiCl}^7$  (0.3 M in THF, 4.0 mL) [Note: the use of  $\text{LaCl}_3 \cdot 2\text{LiCl}$  provided lower yields of 1,2-addition product **39**] via syringe and the solution was immediately cooled to 0 °C via an ice/water bath. After 15 min of continued stirring at 0 °C,  $\text{MeMgCl}$  (3.0 M in THF, 0.4 mL) was added dropwise via syringe. Upon complete addition, the resulting dark-yellow reaction mixture was stirred for an additional 20 min at 0 °C affording a 0.27 M stock solution of nucleophile that was used immediately.

A separate oven-dried, 100 mL round-bottomed flask was charged with a 3:1 regioisomeric mixture of enone **38** (399 mg, 0.91 mmol, 1.0 equiv) and anhydrous THF (18 mL). The resulting solution was cooled to 0 °C via an ice/water bath and after 15 min of continued stirring, the freshly prepared stock solution of nucleophile (0.27 M in THF, 6.7 mL, 1.82 mmol, 2.0 equiv) was added dropwise via syringe. Upon complete addition, the reaction was continued at 0 °C for 20 min at which point TLC and LCMS analysis indicated the complete consumption of starting material. The reaction was quenched with the addition of pH 7 buffer (3.6 mL) at 0 °C and then warmed to ambient temperature. The mixture was diluted with  $\text{Et}_2\text{O}$  (10 mL) and filtered through a pre-equilibrated  $\text{SiO}_2$  pad layered with Celite, washing with 80/1%  $\text{EtOAc}/\text{Et}_3\text{N}/\text{hexanes}$ . The filtrate was then concentrated *in vacuo* and directly purified via  $\text{SiO}_2$  flash chromatography (25/1 to 35/1 to 45/1%  $\text{EtOAc}/\text{Et}_3\text{N}/\text{hexanes}$ ) to afford alcohol **39** (281 mg, 0.62 mmol, 68% yield, single dr) as a white foam. The diastereoselectivity was confirmed by *n*Oe analysis.

**TLC (40% EtOAc/hexanes):**  $R_f$  0.34 (UV, *p*-anisaldehyde).

**$^1\text{H}$  NMR (500 MHz,  $\text{C}_6\text{D}_6$ ):**  $\delta$  7.96 (d,  $J = 6.9$  Hz, 2H), 7.10 – 6.99 (m, 3H), 4.85 (s, 1H), 2.75 (td,  $J = 14.6, 14.2, 7.7$  Hz, 1H), 2.62 (s, 1H, OH), 2.49 (d,  $J = 19.3$  Hz, 1H), 2.35 (m, 1H), 2.22 (d,  $J = 19.3$  Hz, 1H), 1.73 (s, 1H, OH), 1.69 – 1.51 (m, 3H), 1.26 (d,  $J = 7.0$  Hz, 3H), 1.17 (s, 3H), 1.09 (m, 1H), 1.04 (d,  $J = 6.3$  Hz, 3H), 0.94 (s, 3H), 0.82 (d,  $J = 6.4$  Hz, 3H).

**$^{13}\text{C}$  NMR (101 MHz,  $\text{C}_6\text{D}_6$ ):**  $\delta$  168.4, 167.4, 148.6, 145.0, 133.1, 131.9, 129.6, 128.6, 96.8, 85.5, 82.7, 71.9, 60.4, 45.0, 44.4, 41.7, 33.5, 30.0, 28.5, 22.4, 21.9, 20.3, 19.8, 12.4.

**FTIR (NaCl, thin film):** 3460, 2960, 2884, 1724, 1274, 1115, 1023  $\text{cm}^{-1}$ .

**HRMS (ESI):** calc'd for  $[\text{M}+\text{Na}]^+$  477.2248, found 477.2229.

$[\alpha]_{\text{D}}^{25} = +10^\circ$  ( $c = 0.125, \text{CH}_2\text{Cl}_2$ ).

## Preparation of orthobenzoate **41**

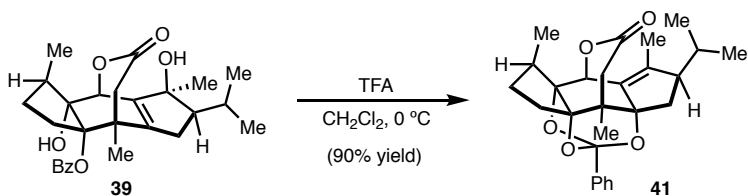

An oven-dried, 50 mL round-bottomed flask was treated with hydroxybenzoate **39** (281 mg, 0.62 mmol, 1.0 equiv) and anhydrous CH<sub>2</sub>Cl<sub>2</sub> (20 mL). The resulting solution was cooled to 0 °C via an ice/water bath and stirring was continued at this temperature for 15 min prior to the addition of TFA (0.24 mL, 3.09 mmol, 5.0 equiv) *as a single portion* via syringe. The reaction was allowed 5 min at 0 °C, during which time the colorless reaction mixture becomes bright pink, diluted with CH<sub>2</sub>Cl<sub>2</sub> (10 mL) and treated with sat. aq. NaHCO<sub>3</sub> (10 mL). The layers were separated and the aqueous layer was extracted with CH<sub>2</sub>Cl<sub>2</sub> (3 × 10 mL). The combined organic layers were washed with sat. aq. NaHCO<sub>3</sub> (20 mL), dried over Na<sub>2</sub>SO<sub>4</sub>, filtered, and concentrated *in vacuo*. The crude residue could be used directly in the next step after azeotroping with anhydrous PhMe three times immediately prior to use. The crude residue was purified via SiO<sub>2</sub> flash chromatography (10 to 20% EtOAc/hexanes) for characterization purposes to afford orthobenzoate **41** (243 mg, 0.56 mmol, 90% yield) as a white foam.

**TLC (10% EtOAc/hexanes):** R<sub>f</sub> 0.24 (UV, *p*-anisaldehyde).

**<sup>1</sup>H NMR (400 MHz, CDCl<sub>3</sub>):** δ 7.68 – 7.53 (m, 2H), 7.43 – 7.31 (m, 3H), 5.37 (s, 1H), 3.06 (t, *J* = 9.2 Hz, 1H), 2.71 (d, *J* = 19.0 Hz, 1H), 2.62 (d, *J* = 19.0 Hz, 1H), 2.54 (dt, *J* = 12.5, 7.2 Hz, 1H), 2.23 – 2.09 (m, 2H), 2.07 – 1.93 (m, 2H), 1.89 (dd, *J* = 14.2, 6.9 Hz, 1H), 1.83 (d, *J* = 1.3 Hz, 3H), 1.69 (dd, *J* = 14.2, 8.2 Hz, 1H), 1.65 (m, 1H), 1.27 (d, *J* = 7.1 Hz, 3H), 1.25 (s, 3H), 0.96 (d, *J* = 6.9 Hz, 3H), 0.71 (d, *J* = 6.8 Hz, 3H).

**<sup>13</sup>C NMR (101 MHz, CDCl<sub>3</sub>):** δ 171.0, 150.2, 135.0, 134.2, 129.6, 128.1, 126.0, 120.9, 94.5, 91.0, 91.0, 69.5, 51.9, 42.1, 41.7, 40.1, 34.1, 30.5, 28.5, 27.3, 21.1, 17.4, 15.7, 13.0, 12.6.

**FTIR (NaCl, thin film):** 2958, 2878, 1731, 1351, 1190 cm<sup>-1</sup>.

**HRMS (ESI):** calc'd for [M+Na]<sup>+</sup> 459.2142, found 459.2154.

**[α]<sub>D</sub><sup>25</sup>** = -201° (*c* = 0.175, CHCl<sub>3</sub>).

## Preparation of allylic alcohol **42**

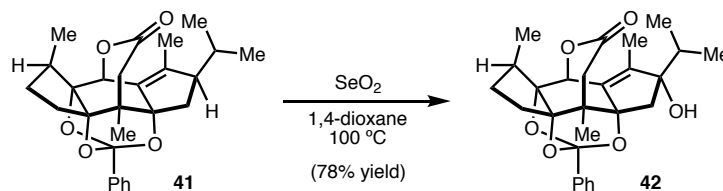

An oven-dried 48 mL pressure flask was charged with orthobenzoate **41** (242 mg, 0.55 mmol, 1.0 equiv), anhydrous 1,4-dioxane (18 mL), and SeO<sub>2</sub> (308 mg, 2.77 mmol, 5.0 equiv) [Note: SeO<sub>2</sub> was stored in a nitrogen-filled glove box to maintain the integrity of the reagent]. The flask was immediately capped with a CAPFE O-ring lined cap and submerged in a preheated oil bath at 100 °C. The reaction mixture was vigorously stirred for 1 h at this temperature, at which point TLC and LCMS analysis indicated the complete consumption of starting material. The pressure flask was removed from the oil bath and cooled to ambient temperature, and the reaction mixture was diluted with Et<sub>2</sub>O (10 mL) and filtered over a pre-equilibrated SiO<sub>2</sub> pad layered with Celite, washing with 80% EtOAc/hexanes. The filtrate was concentrated *in vacuo* and the crude residue was directly purified via SiO<sub>2</sub> flash chromatography (5 to 10 to 20 to 30% EtOAc/hexanes) to afford alcohol **42** (196 mg, 0.43 mmol, 78% yield) as a yellow foam.

**TLC (15% EtOAc/hexanes):** R<sub>f</sub> 0.14 (UV, *p*-anisaldehyde).

**<sup>1</sup>H NMR (400 MHz, C<sub>6</sub>D<sub>6</sub>):** δ 7.83 – 7.65 (m, 2H), 7.14 – 7.01 (m, 3H), 5.35 (s, 1H), 2.49 (d, *J* = 18.9 Hz, 1H), 2.40 (dq, *J* = 11.7, 7.1 Hz, 1H), 2.29 (d, *J* = 18.9 Hz, 1H), 2.01 (s, 1H), 1.91 (hept, *J* = 6.8 Hz, 1H), 1.81 (m, 1H), 1.80 (d, *J* = 14.6 Hz, 1H), 1.73 – 1.63 (m, 3H), 1.67 (d, *J* = 14.7 Hz, 1H), 1.52 (s, 3H), 1.18 (d, *J* = 7.1 Hz, 3H), 1.03 (d, *J* = 6.7 Hz, 3H), 0.97 (s, 3H), 0.46 (d, *J* = 6.7 Hz, 3H).

**<sup>13</sup>C NMR (101 MHz, C<sub>6</sub>D<sub>6</sub>):** δ 168.8, 150.7, 137.1, 135.7, 129.8, 126.4, 121.6, 94.6, 91.3, 90.0, 87.9, 69.0, 42.0, 41.9, 39.1, 37.8, 34.3, 32.3, 28.6, 18.1, 17.6, 16.7, 13.0, 9.4.

**FTIR (NaCl, thin film):** 3540, 2960, 2879, 1732, 1352, 1078, 1038 cm<sup>-1</sup>.

**HRMS (ESI):** calc'd for [M+H]<sup>+</sup> 453.2272, found 453.2271.

**[α]<sub>D</sub><sup>25</sup>** = -161° (*c* = 0.115, CH<sub>2</sub>Cl<sub>2</sub>).

## Preparation of epoxide 43

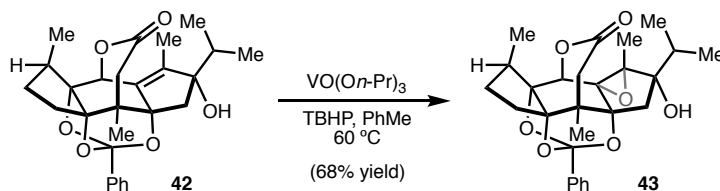

An oven-dried, 20 mL scintillation vial was treated with alkene **42** (104 mg, 230  $\mu\text{mol}$ , 1.0 equiv) and anhydrous PhMe (7.7 mL). The resulting solution was treated with  $\text{VO}(\text{O}i\text{-Pr})_3$  (26  $\mu\text{L}$ , 115  $\mu\text{mol}$ , 0.5 equiv) via microsyringe prior to the addition of TBHP (5.5 M in decanes, 125  $\mu\text{L}$ , 689  $\mu\text{mol}$ , 3.0 equiv) via microsyringe. The vial was capped with a Teflon-lined cap under Ar and immediately placed in a preheated heating block at 60 °C. The reaction was left to stir at this temperature for 14 h prior to adding an additional portion of  $\text{VO}(\text{O}i\text{-Pr})_3$  (26  $\mu\text{L}$ , 115  $\mu\text{mol}$ , 0.5 equiv) and TBHP (5.5 M in decanes, 125  $\mu\text{L}$ , 689  $\mu\text{mol}$ , 3.0 equiv) via syringe at ambient temperature. The reaction was continued at 60 °C for an additional 14 h at which point LCMS analysis indicated complete consumption of the starting material [Note: the starting material and product epoxide are indistinguishable by TLC and thus requires the use of LCMS for reaction monitoring]. The reaction was cooled to ambient temperature and quenched with the addition of pH 7 buffer (6 mL) and sat. aq.  $\text{Na}_2\text{S}_2\text{O}_3$  (3 mL). EtOAc (10 mL) was added and the layers were separated. The aqueous layer was extracted with EtOAc (3  $\times$  10 mL) and the combined organic layers were washed with brine (10 mL), dried over  $\text{Na}_2\text{SO}_4$ , filtered over Celite, and concentrated *in vacuo*. The crude residue was purified via  $\text{SiO}_2$  flash chromatography (1 to 2 to 3% acetone/ $\text{CH}_2\text{Cl}_2$ ) to afford epoxide **43** (73.2 mg, 156  $\mu\text{mol}$ , 68% yield) as a white foam. The stereochemistry was confirmed by nOe analysis.

**TLC (4% acetone/ $\text{CH}_2\text{Cl}_2$ ):**  $R_f$  0.43 (UV, *p*-anisaldehyde).

**$^1\text{H}$  NMR (400 MHz,  $\text{C}_6\text{D}_6$ ):**  $\delta$  7.89 (m, 2H), 7.14 (m, 3H), 4.66 (s, 1H), 3.07 (s, 1H, OH), 2.70 (d,  $J = 19.6$  Hz, 1H), 2.52 (d,  $J = 19.6$  Hz, 1H), 2.30 (m, 1H), 2.14 (d,  $J = 16.4$  Hz, 1H), 1.82 (p,  $J = 6.8$  Hz, 1H), 1.72 (m, 1H), 1.66 – 1.54 (m, 2H), 1.57 (d,  $J = 16.4$  Hz, 1H), 1.44 (m, 1H), 1.35 (s, 3H), 0.99 (d,  $J = 6.7$  Hz, 3H), 0.98 (d,  $J = 7.1$  Hz, 3H), 0.89 (s, 3H), 0.74 (d,  $J = 6.8$  Hz, 3H).

**$^{13}\text{C}$  NMR (101 MHz,  $\text{C}_6\text{D}_6$ ):**  $\delta$  167.8, 135.5, 129.8, 128.2, 126.5, 121.7, 93.9, 91.9, 85.0, 81.7, 76.5, 76.1, 74.8, 42.5, 41.6, 40.4, 39.6, 34.1, 33.8, 28.5, 19.6, 17.9, 17.4, 13.0, 12.9.

**FTIR (NaCl, thin film):** 3506, 2964, 2880, 1737, 1360, 1199  $\text{cm}^{-1}$ .

**HRMS (ESI):** calc'd for  $[\text{M}+\text{Na}]^+$  491.2040, found 491.2030.

$[\alpha]_D^{25} = -136^\circ$  ( $c = 0.185$ ,  $\text{CHCl}_3$ ).

## Preparation of 2-phenylnaphthalene (S12)

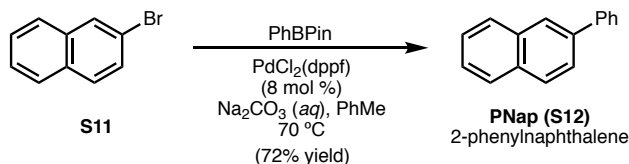

An oven-dried, 250 mL round-bottomed flask was charged with 2-bromonaphthalene (3.11 g, 15.0 mmol, 1.0 equiv), phenylboronic acid pinacol ester (6.12 g, 30.0 mmol, 2.0 equiv), and PdCl<sub>2</sub>(dppf)•CH<sub>2</sub>Cl<sub>2</sub> (980 mg, 1.20 mmol, 8 mol %). The flask was equipped with a rubber septum and evacuated/refilled three times with Ar. Anhydrous PhMe (100 mL) and freshly degassed 2.0 M Na<sub>2</sub>CO<sub>3</sub> (aq) (37.5 mL, 75.0 mmol, 5.0 equiv) were subsequently added via syringe [Note: 2.0 M Na<sub>2</sub>CO<sub>3</sub> (aq) was degassed by sparging with Ar for ≥15 min]. The biphasic mixture was immediately placed in a preheated oil bath at 70 °C equipped with a double-walled Ar balloon and the reaction was continued at 70 °C with vigorous stirring (≥700 rpm) until TLC analysis indicated the complete consumption of starting material (*ca.* 2 h). The reaction mixture was cooled to ambient temperature, diluted with EtOAc (40 mL), and treated with sat. aq. NH<sub>4</sub>Cl (60 mL). The layers were separated and the aqueous layer was extracted with EtOAc (1 × 100 mL). The combined layers were washed with brine (50 mL), dried over Na<sub>2</sub>SO<sub>4</sub>, filtered over Celite, and concentrated *in vacuo*. The crude residue was purified via SiO<sub>2</sub> flash chromatography (5% CH<sub>2</sub>Cl<sub>2</sub>/hexanes) to afford 2-phenylnaphthalene (2.25 g, 11.0 mmol, 72% yield) as a white solid [Note: the impure fractions can be pooled and repurified to improve the isolated yield if desired].

Spectral data of synthetic 2-phenylnaphthalene (S12) matched that obtained on an authentic sample purchased from Acros Organics.



## Preparation of pentacycle 46

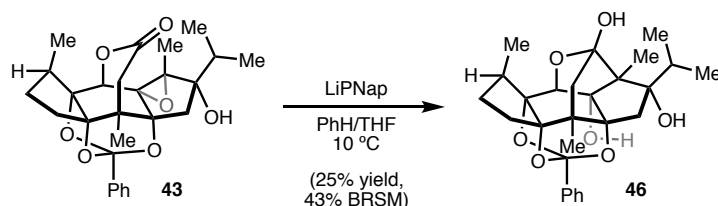

LiPNap was prepared according to the following procedure: An oven-dried, 25 mL Schlenk flask containing a borosilicate glass-coated magnetic stirbar was charged with 2-phenylnaphthalene (409 mg, 2.0 mmol) and freshly cut lithium wire (14.0 mg, 2.0 mmol) [Note: Immediately prior to use, lithium wire was washed with hexanes, hammered out into a foil, and cut into several small strips]. The Schlenk flask was evacuated and refilled with Ar three times before anhydrous THF (12.5 mL) was added and the resulting reaction mixture was vigorously stirred (900-1000 rpm) at ambient temperature for 10 min, at which point the solution becomes a deep-green. After the reaction mixture was stirred at ambient temperature for approximately 4 h, the LiPNap solution (~0.16 M) was cooled to 0 °C via an ice/water bath and immediately used.

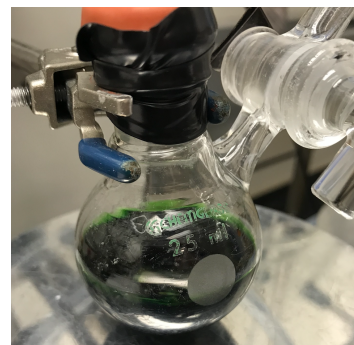

An oven-dried, 2 dram vial was charged with epoxide **43** (20.4 mg, 43.5  $\mu\text{mol}$ , 1.0 equiv) and anhydrous PhH (1.4 mL) [Note: epoxide **43** was azeotroped with PhH three times prior to use]. The solution was cooled to +10 °C via a dry ice/1,4-dioxane bath and stirring was continued for 15 min at this temperature prior to the dropwise addition of freshly generated LiPNap (0.16 M in THF, 1.2 mL, 196  $\mu\text{mol}$ , 4.5 equiv). Upon complete addition, the resulting dark-orange reaction mixture was stirred for 5 min before adding sat. aq.  $\text{NaHCO}_3$  (1 mL). The mixture was warmed to ambient temperature, diluted with  $\text{CHCl}_3$  (1 mL), and the layers were separated. The aqueous layer was extracted with  $\text{CHCl}_3$  ( $5 \times 1$  mL) and the combined organic layers were dried over  $\text{Na}_2\text{SO}_4$ , filtered, and concentrated *in vacuo*. The crude residue was purified via preparative TLC (3% MeOH/ $\text{CH}_2\text{Cl}_2$ ) to afford pentacycle **46** (5.1 mg, 10.8  $\mu\text{mol}$ , 25% yield) as an off-white foam. A second round of purification of the less polar fraction via  $\text{SiO}_2$  flash chromatography (0 to 2 to 4% acetone/ $\text{CH}_2\text{Cl}_2$ ) affords recovered **43** (8.8 mg, 43% BRSM).

**TLC (7% MeOH/ $\text{CH}_2\text{Cl}_2$ ):**  $R_f$  0.30 (UV, *p*-anisaldehyde).

**$^1\text{H}$  NMR (400 MHz,  $\text{CDCl}_3$ ):**  $\delta$  7.68 – 7.59 (m, 2H), 7.47 – 7.33 (m, 3H), 4.25 (s, 1H), 3.19 (s, 1H, OH), 3.09 (d,  $J = 1.9$  Hz, 1H, OH), 2.81 (s, 1H, OH), 2.56 (d,  $J = 15.5$  Hz, 1H), 2.31 (dt,  $J = 10.5, 7.1$  Hz, 1H), 2.14 – 2.04 (m, 2H), 2.11 (d,  $J = 15.6$  Hz, 1H), 2.08 (d,  $J = 14.7$  Hz, 1H), 1.97 (m, 1H), 1.96 (d,  $J = 14.7$  Hz, 1H), 1.88 (m, 1H),

1.72 (m, 1H), 1.40 (s, 3H), 1.29 (s, 3H), 1.14 (d,  $J = 7.1$  Hz, 3H), 1.06 (d,  $J = 6.7$  Hz, 3H), 1.04 (d,  $J = 6.9$  Hz, 3H).

$^{13}\text{C}$  NMR (101 MHz,  $\text{CDCl}_3$ ):  $\delta$  134.6, 129.9, 128.2, 126.0, 120.4, 104.8, 96.0, 92.6, 88.6, 85.7, 81.0, 74.2, 60.1, 47.8, 42.1, 41.4, 39.1, 34.1, 33.3, 28.6, 20.1, 18.8, 18.6, 14.0, 9.7.

FTIR (NaCl, thin film): 3451, 2957, 2924, 1853, 1725, 1462, 1350, 1033  $\text{cm}^{-1}$ .

HRMS (ESI): calc'd for  $[\text{M}+\text{H}]^+$  471.2377, found 471.2385.

$[\alpha]_{\text{D}}^{25} = -52^\circ$  ( $c = 0.090$ ,  $\text{CHCl}_3$ ).

**Table S2.** Optimization of reductive cyclization to convert epoxide **43** to pentacycle **46**.

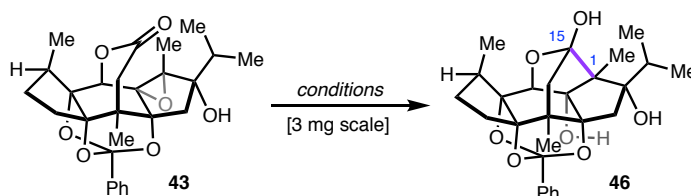

| entry | reagent        | temperature | solvent         | additive                                 | ratio              | yield           |
|-------|----------------|-------------|-----------------|------------------------------------------|--------------------|-----------------|
| 1     | LiDBB          | -78 °C      | THF             | —                                        | messy              | —               |
| 2     | LiDBB          | -20 °C      | THF             | —                                        | messy              | —               |
| 3     | LiBiphenyl     | -20 °C      | THF             | —                                        | 3:1 <b>43:46</b>   | —               |
| 4     | LiDBNap        | -20 °C      | THF             | —                                        | 3:1 <b>43:46</b>   | —               |
| 5     | LiNap          | -40 °C      | THF             | —                                        | 2:1 <b>43:46</b>   | 10% yield       |
| 6     | LiNap          | -20 °C      | THF             | —                                        | 2:1 <b>43:46</b>   | 17% yield       |
| 7     | LiNap          | -20 °C      | THF             | BMEA                                     | 6:1 <b>43:46</b>   | —               |
| 8     | NaNap          | -20 °C      | THF             | —                                        | >10:1 <b>43:46</b> | —               |
| 9     | LiAnth         | 23 °C       | THF             | —                                        | full conversion    | <b>S19</b> only |
| 10    | LiPNap         | -20 °C      | 2-MeTHF         | —                                        | 3:1 <b>43:46</b>   | 14% yield       |
| 11    | LiPNap         | 10 °C       | THF             | —                                        | 2:1 <b>43:46</b>   | 14% yield       |
| 12    | LiPNap         | 10 °C       | PhH             | —                                        | 2:1 <b>43:46</b>   | 23% yield       |
| 13    | LiPNap         | 23 °C       | PhH             | —                                        | 3:1 <b>43:46</b>   | 13% yield       |
| 14    | LiPNap         | 10 °C       | $\text{PhCF}_3$ | —                                        | no reaction        | —               |
| 15    | LiPNap         | -20 °C      | PhMe            | —                                        | 2.5:1 <b>43:46</b> | 20% yield       |
| 16    | $\text{Sml}_2$ | 0 °C        | THF             | $\text{H}_2\text{O}+\text{Et}_3\text{N}$ | 70% conversion     | <b>S18</b> only |
| 17    | $\text{Sml}_2$ | 23 °C       | THF             | $\text{H}_2\text{O}+\text{Et}_3\text{N}$ | 85% conversion     | <b>S18</b> only |

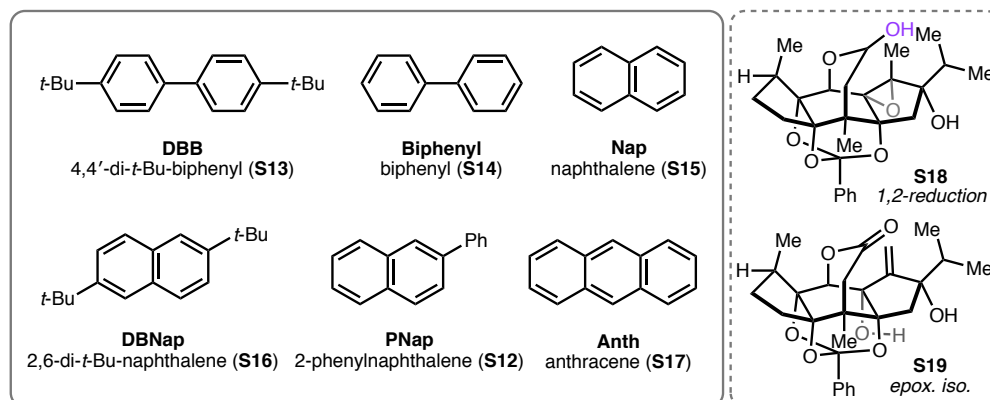

## Reductive cyclization of epoxy lactone **S20**

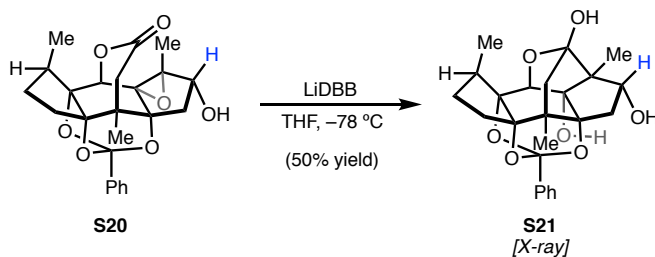

An oven-dried, 25 mL round-bottomed flask containing a borosilicate glass-coated magnetic stirbar was charged with epoxide **S20** (55.8 mg, 0.13 mmol, 1.0 equiv) and anhydrous THF (9.8 mL) [Note: epoxide **S20** was azeotroped with PhH three times prior to use]. The solution was cooled to  $-78\text{ }^{\circ}\text{C}$  via a dry ice/acetone bath and stirring was continued for 15 min at this temperature prior to the dropwise addition of freshly generated LiDBB<sup>8</sup> (0.16 M in THF, 3.3 mL, 0.52 mmol, 4.0 equiv). Upon complete addition, the resulting dark-orange reaction mixture was stirred for 5 min before adding sat. aq.  $\text{NH}_4\text{Cl}$  (10 mL). The mixture was warmed to ambient temperature, diluted with  $\text{CHCl}_3$  (10 mL), and the layers were separated. The aqueous layer was extracted with  $\text{CHCl}_3$  ( $5 \times 10\text{ mL}$ ) and the combined organic layers were dried over  $\text{Na}_2\text{SO}_4$ , filtered, and concentrated *in vacuo*. The crude residue was purified via  $\text{SiO}_2$  flash chromatography (4 to 6 to 8%  $\text{MeOH}/\text{CHCl}_3$ ) to afford pentacycle **S21** (28.0 mg, 65.4  $\mu\text{mol}$ , 50% yield) as an off-white foam.

**TLC (8%  $\text{MeOH}/\text{CH}_2\text{Cl}_2$ ):**  $R_f$  0.33 (UV, *p*-anisaldehyde).

**$^1\text{H}$  NMR (400 MHz,  $\text{CD}_3\text{OD}$ ):**  $\delta$  7.63 (m, 2H), 7.37 (m, 3H), 4.21 (s, 1H), 3.88 (dd,  $J = 7.5, 6.4$  Hz, 1H), 2.62 (dd,  $J = 13.6, 7.5$  Hz, 1H), 2.31 (dp,  $J = 10.0, 7.0$  Hz, 1H), 2.14 (m, 1H), 2.06 (m, 1H), 2.06 (dd,  $J = 13.7, 6.4$  Hz, 1H), 2.00 (d,  $J = 14.8$  Hz, 1H), 1.87 – 1.71 (m, 2H), 1.63 (d,  $J = 14.8$  Hz, 1H), 1.26 (s, 3H), 1.16 (s, 3H), 1.13 (d,  $J = 7.1$  Hz, 3H).

**$^{13}\text{C}$  NMR (101 MHz,  $\text{CD}_3\text{OD}$ ):**  $\delta$  136.8, 130.5, 128.8, 127.3, 121.8, 106.4, 96.9, 93.7, 87.3, 87.0, 76.4, 70.0, 58.4, 43.1, 42.8, 42.4, 39.7, 34.7, 29.8, 20.1, 14.1, 8.7.

**FTIR (NaCl, thin film):** 3418, 2938, 1462, 1453, 1350, 1026  $\text{cm}^{-1}$ .

**HRMS (ESI):** calc'd for  $[\text{M}+\text{Na}]^+$  451.1727, found 451.1726.

$[\alpha]_{\text{D}}^{25} = -80^{\circ}$  ( $c = 0.065, \text{CHCl}_3$ ).

### Preparation of (+)-perseanol (3)

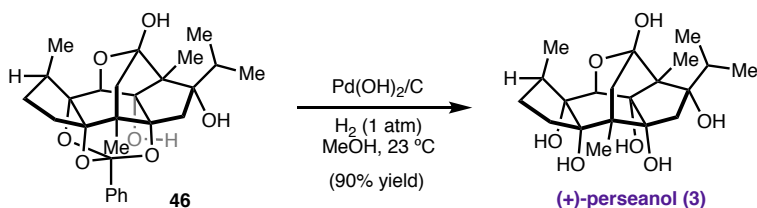

An oven-dried, 2 dram vial was charged with pentacycle **46** (6.7 mg, 14.2  $\mu\text{mol}$ , 1.0 equiv), Pd(OH)<sub>2</sub>/C (20 wt %, 14 mg), and MeOH (2.9 mL). The vial was capped with a rubber septum and the reaction mixture was vigorously stirred (1000 rpm) while flushing the headspace with H<sub>2</sub> for 5 minutes via a double-walled balloon. The suspension was vigorously stirred under H<sub>2</sub> until LCMS indicated complete consumption of the starting material (*ca.* 1.5 h) then immediately diluted with CH<sub>2</sub>Cl<sub>2</sub> (2 mL), filtered through a short pad of Celite, and concentrated *in vacuo*. Purification of the crude residue by SiO<sub>2</sub> flash chromatography (4 to 8 to 10% MeOH/CHCl<sub>3</sub>) afforded (+)-perseanol (4.9 mg, 12.8  $\mu\text{mol}$ , 90% yield) as a white solid.

**TLC (10% MeOH/CH<sub>2</sub>Cl<sub>2</sub>):** R<sub>f</sub> 0.21 (*p*-anisaldehyde).

**<sup>1</sup>H NMR (500 MHz, CD<sub>3</sub>OD):**  $\delta$  3.82 (s, 1H, C<sub>11</sub>), 2.59 (d,  $J = 15.8$  Hz, 1H, C<sub>3</sub>), 2.23 (m, 1H, C<sub>7</sub>), 1.98 (dt,  $J = 12.7, 6.8$  Hz, 1H, C<sub>9</sub>), 1.92 (d,  $J = 14.7$  Hz, 1H, C<sub>14</sub>), 1.90 (d,  $J = 15.8$  Hz, 1H, C<sub>3</sub>), 1.86 (p,  $J = 6.7$  Hz, 1H, C<sub>13</sub>), 1.64 – 1.53 (m, 2H, C<sub>8</sub>), 1.64 (d,  $J = 14.7$  Hz, 1H, C<sub>14</sub>), 1.57 (m, 1H, C<sub>7</sub>), 1.29 (s, 3H, C<sub>17</sub>), 1.13 (s, 3H, C<sub>20</sub>), 1.11 (d,  $J = 6.9$  Hz, 3H, C<sub>21</sub>), 1.02 (d,  $J = 6.6$  Hz, 3H, C<sub>19</sub>), 0.97 (d,  $J = 6.8$  Hz, 3H, C<sub>18</sub>).

**<sup>13</sup>C NMR (101 MHz, CD<sub>3</sub>OD):**  $\delta$  104.3 (C<sub>15</sub>), 89.2 (C<sub>12</sub>), 85.1 (C<sub>4</sub>), 83.1 (C<sub>6</sub>), 82.1 (C<sub>2</sub>), 81.6 (C<sub>10</sub>), 77.7 (C<sub>11</sub>), 63.0 (C<sub>1</sub>), 52.6 (C<sub>3</sub>), 46.9 (C<sub>9</sub>), 45.5 (C<sub>14</sub>), 44.7 (C<sub>5</sub>), 37.5 (C<sub>7</sub>), 35.3 (C<sub>13</sub>), 30.1 (C<sub>8</sub>), 18.9 (C<sub>18</sub>), 18.9 (C<sub>19</sub>), 18.5 (C<sub>21</sub>), 12.8 (C<sub>20</sub>), 10.7 (C<sub>17</sub>).

**FTIR (NaCl, thin film):** 3383, 2925, 2855, 1728, 1463, 1384, 1287, 1106, 1029 cm<sup>-1</sup>.

**HRMS (ESI:NES):** calc'd for [M-H]<sup>-</sup> 383.2075, found 383.2075.

**HRMS (ESI:PES):** calc'd for [M+Na]<sup>+</sup> 407.2040, found 407.2039.

$[\alpha]_{\text{D}}^{25} = +3^{\circ}$  ( $c = 0.085$ , MeOH).

#### 4. $^1\text{H}$ and $^{13}\text{C}$ NMR Comparison Tables for Perseanol

**Table S3.** Comparison of  $^1\text{H}$  NMR data for Perseanol.

| Proton No. | Zhang and coworkers<br>Natural Perseanol<br>$^1\text{H}$ NMR, 400 MHz, $\text{CD}_3\text{OD}$<br>$^1\text{H}$ [ $\delta$ , multi., $J$ (Hz)] | This Work,<br>Synthetic Perseanol<br>$^1\text{H}$ NMR, 500 MHz, $\text{CD}_3\text{OD}$<br>$^1\text{H}$ [ $\delta$ , multi., $J$ (Hz)] |
|------------|----------------------------------------------------------------------------------------------------------------------------------------------|---------------------------------------------------------------------------------------------------------------------------------------|
| 1          |                                                                                                                                              |                                                                                                                                       |
| 2          |                                                                                                                                              |                                                                                                                                       |
| 3a         | 1.90 (d, $J = 15.8$ Hz)                                                                                                                      | 1.90 (d, $J = 15.8$ Hz)                                                                                                               |
| 3b         | 2.59 (d, $J = 15.8$ Hz)                                                                                                                      | 2.59 (d, $J = 15.8$ Hz)                                                                                                               |
| 4          |                                                                                                                                              |                                                                                                                                       |
| 5          |                                                                                                                                              |                                                                                                                                       |
| 6          |                                                                                                                                              |                                                                                                                                       |
| 7a         | 2.22 (m)                                                                                                                                     | 2.23 (m)                                                                                                                              |
| 7b         | 1.57 (m)                                                                                                                                     | 1.57 (m)                                                                                                                              |
| 8          | 1.63 – 1.52 (m)                                                                                                                              | 1.64 – 1.53 (m)                                                                                                                       |
| 9          | 1.98 (dt, $J = 12.9, 7.0$ Hz)                                                                                                                | 1.98 (dt, $J = 12.7, 6.9$ Hz)                                                                                                         |
| 10         |                                                                                                                                              |                                                                                                                                       |
| 11         | 3.82 (s)                                                                                                                                     | 3.82 (s)                                                                                                                              |
| 12         |                                                                                                                                              |                                                                                                                                       |
| 13         | 1.87 (p, $J = 6.6$ Hz)                                                                                                                       | 1.86 (p, $J = 6.7$ Hz)                                                                                                                |
| 14a        | 1.64 (d, $J = 14.6$ Hz)                                                                                                                      | 1.64 (d, $J = 14.7$ Hz)                                                                                                               |
| 14b        | 1.92 (d, $J = 14.7$ Hz)                                                                                                                      | 1.92 (d, $J = 14.7$ Hz)                                                                                                               |
| 15         |                                                                                                                                              |                                                                                                                                       |
| 17         | 1.30 (s)                                                                                                                                     | 1.29 (s)                                                                                                                              |
| 18         | 0.97 (d, $J = 6.8$ Hz)                                                                                                                       | 0.97 (d, $J = 6.8$ Hz)                                                                                                                |
| 19         | 1.02 (d, $J = 6.6$ Hz)                                                                                                                       | 1.02 (d, $J = 6.6$ Hz)                                                                                                                |
| 20         | 1.13 (s)                                                                                                                                     | 1.13 (s)                                                                                                                              |
| 21         | 1.11 (d, $J = 7.0$ Hz)                                                                                                                       | 1.11 (d, $J = 6.9$ Hz)                                                                                                                |

**Table S4.** Comparison of  $^{13}\text{C}$  NMR data for Perseanol.

| Carbon No. | Zhang and coworkers<br>Natural Perseanol<br>$^{13}\text{C}$ NMR, 101 MHz, $\text{CD}_3\text{OD}$<br>$^{13}\text{C}$ ( $\delta$ ) ppm | This Work,<br>Synthetic Perseanol<br>$^{13}\text{C}$ NMR, 101 MHz, $\text{CD}_3\text{OD}$<br>$^{13}\text{C}$ ( $\delta$ ) ppm | Chemical Shift<br>Difference, $\Delta\delta$ |
|------------|--------------------------------------------------------------------------------------------------------------------------------------|-------------------------------------------------------------------------------------------------------------------------------|----------------------------------------------|
| 1          | 63.0                                                                                                                                 | 63.0                                                                                                                          | 0                                            |
| 2          | 82.1                                                                                                                                 | 82.1                                                                                                                          | 0                                            |
| 3          | 52.6                                                                                                                                 | 52.6                                                                                                                          | 0                                            |
| 4          | 85.1                                                                                                                                 | 85.1                                                                                                                          | 0                                            |
| 5          | 44.7                                                                                                                                 | 44.7                                                                                                                          | 0                                            |
| 6          | 83.1                                                                                                                                 | 83.1                                                                                                                          | 0                                            |
| 7          | 37.5                                                                                                                                 | 37.5                                                                                                                          | 0                                            |
| 8          | 30.1                                                                                                                                 | 30.1                                                                                                                          | 0                                            |
| 9          | 46.9                                                                                                                                 | 46.9                                                                                                                          | 0                                            |
| 10         | 81.7                                                                                                                                 | 81.6                                                                                                                          | 0.1                                          |
| 11         | 77.6                                                                                                                                 | 77.7                                                                                                                          | 0.1                                          |
| 12         | 89.2                                                                                                                                 | 89.2                                                                                                                          | 0                                            |
| 13         | 35.2                                                                                                                                 | 35.3                                                                                                                          | 0.1                                          |
| 14         | 45.5                                                                                                                                 | 45.5                                                                                                                          | 0                                            |
| 15         | 104.3                                                                                                                                | 104.3                                                                                                                         | 0                                            |
| 17         | 10.7                                                                                                                                 | 10.7                                                                                                                          | 0                                            |
| 18         | 18.9                                                                                                                                 | 18.9                                                                                                                          | 0                                            |
| 19         | 18.9                                                                                                                                 | 18.9                                                                                                                          | 0                                            |
| 20         | 12.8                                                                                                                                 | 12.8                                                                                                                          | 0                                            |
| 21         | 18.5                                                                                                                                 | 18.5                                                                                                                          | 0                                            |

## 5. Single Crystal X-ray Diffraction Data

Low-temperature diffraction data ( $\varphi$ - and  $\omega$ -scans) was collected on a Bruker AXS D8 VENTURE KAPPA diffractometer coupled to a PHOTON 100 CMOS detector with Cu-K $\alpha$  radiation ( $\lambda = 1.54178 \text{ \AA}$ ) from a I $\mu$ S HB micro-focus sealed X-ray tube. All diffractometer manipulations, including data collection, integration, and scaling were carried out using the Bruker APEXII software.<sup>9</sup> Absorption corrections were applied using SADABS.<sup>10</sup> The structure was solved by intrinsic phasing using SHELXT<sup>11</sup> and refined against  $F^2$  on all data by full-matrix least squares with SHELXL-2014<sup>11</sup> using established refinement techniques.<sup>12</sup> All non-hydrogen atoms were refined anisotropically. Unless otherwise noted, all hydrogen atoms were included into the model at geometrically calculated positions and refined using a riding model. The isotropic displacement parameters of all hydrogen atoms were fixed to 1.2 times the  $U$  value of the atoms they are linked to (1.5 times for methyl groups and hydroxyl groups). Absolute configuration was determined by anomalous dispersion.<sup>13</sup> Crystallographic data for **32** and **S21** can be obtained free of charge from The Cambridge Crystallographic Data Center (CCDC) via [www.ccdc.cam.ac.uk/data\\_request/cif](http://www.ccdc.cam.ac.uk/data_request/cif) under CCDC deposition number 1909375 and 1914686, respectively. Graphical representation of **32** and **S21** with 50% probability thermal ellipsoids was generated using Mercury visualization software.

**Table S5.** Crystal data and structure refinement for **32**.

|                                   |                                                |                  |
|-----------------------------------|------------------------------------------------|------------------|
| Identification code               | v18645_a                                       |                  |
| Empirical formula                 | C <sub>34</sub> H <sub>40</sub> O <sub>6</sub> |                  |
| Formula weight                    | 544.66                                         |                  |
| Temperature                       | 100.03 K                                       |                  |
| Wavelength                        | 1.54178 Å                                      |                  |
| Crystal system                    | Monoclinic                                     |                  |
| Space group                       | P12 <sub>1</sub> 1                             |                  |
| Unit cell dimensions              | a = 11.6776(5) Å                               | α = 90°.         |
|                                   | b = 8.9076(4) Å                                | β = 108.474(2)°. |
|                                   | c = 14.9231(7) Å                               | γ = 90°.         |
| Volume                            | 1472.30(12) Å <sup>3</sup>                     |                  |
| Z                                 | 2                                              |                  |
| Density (calculated)              | 1.229 Mg/m <sup>3</sup>                        |                  |
| Absorption coefficient            | 0.667 mm <sup>-1</sup>                         |                  |
| F(000)                            | 584                                            |                  |
| Crystal size                      | 0.34 x 0.1 x 0.02 mm <sup>3</sup>              |                  |
| Theta range for data collection   | 3.122 to 80.960°.                              |                  |
| Index ranges                      | -12 ≤ h ≤ 14, -11 ≤ k ≤ 11, -19 ≤ l ≤ 17       |                  |
| Reflections collected             | 27822                                          |                  |
| Independent reflections           | 5545 [R(int) = 0.0500]                         |                  |
| Completeness to theta = 67.679°   | 94.4%                                          |                  |
| Absorption correction             | Semi-empirical from equivalents                |                  |
| Max. and min. transmission        | 0.7543 and 0.5508                              |                  |
| Refinement method                 | Full-matrix least-squares on F <sup>2</sup>    |                  |
| Data / restraints / parameters    | 5545 / 1 / 367                                 |                  |
| Goodness-of-fit on F <sup>2</sup> | 1.061                                          |                  |
| Final R indices [I > 2σ(I)]       | R1 = 0.0353, wR2 = 0.0879                      |                  |
| R indices (all data)              | R1 = 0.0373, wR2 = 0.0895                      |                  |
| Absolute structure parameter      | 0.21(6)                                        |                  |
| Extinction coefficient            | 0.0078(7)                                      |                  |
| Largest diff. peak and hole       | 0.256 and -0.282 e.Å <sup>-3</sup>             |                  |



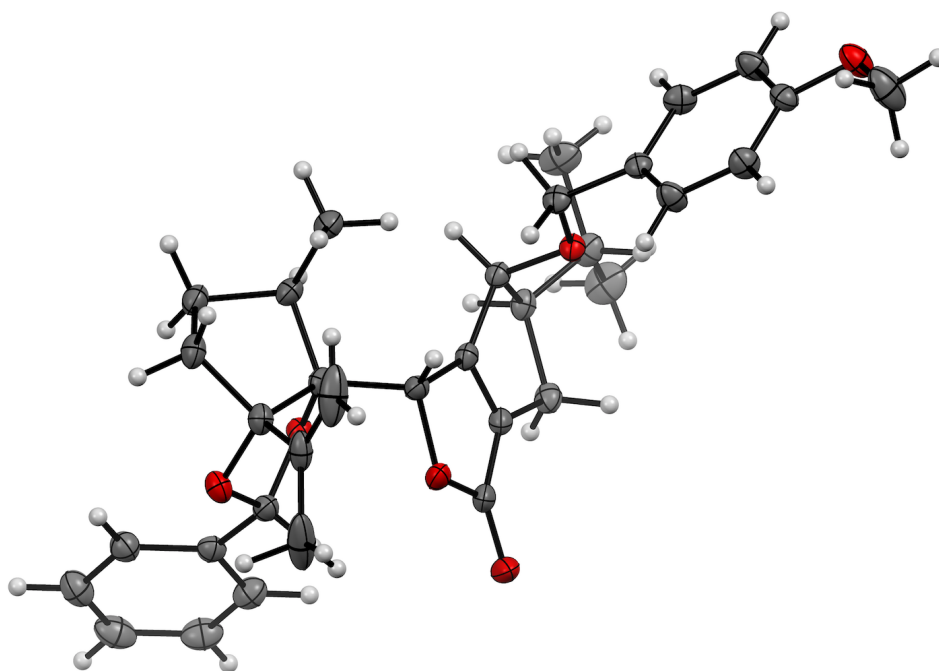

**Figure S5.** Structure of **32** with 50% probability anisotropic displacement ellipsoids.

#### Special Refinement Details for **32**

Compound **32** crystallizes in the monoclinic space group  $P2_1$  with one molecule in the asymmetric unit. The Flack parameter was determined to be 0.21(6);  $abs(x)$  is too high for valid absolute structure assignment by anomalous dispersion.<sup>13</sup> Absolute configuration was determined by synthesis with respect to an unchanging chiral center on the molecule.<sup>2</sup>

**Table S6.** Crystal data and structure refinement for **S21**.

|                                   |                                                                      |                 |
|-----------------------------------|----------------------------------------------------------------------|-----------------|
| Identification code               | v18190_h                                                             |                 |
| Empirical formula                 | 2(C <sub>24</sub> H <sub>28</sub> O <sub>7</sub> ), H <sub>2</sub> O |                 |
| Formula weight                    | 874.94                                                               |                 |
| Temperature                       | 100.0 K                                                              |                 |
| Wavelength                        | 1.54178 Å                                                            |                 |
| Crystal system                    | Monoclinic                                                           |                 |
| Space group                       | P1 <sub>2</sub> ,1                                                   |                 |
| Unit cell dimensions              | a = 12.4227(7) Å                                                     | α = 90°.        |
|                                   | b = 10.3715(6) Å                                                     | β = 93.088(3)°. |
|                                   | c = 15.5943(9) Å                                                     | γ = 90°.        |
| Volume                            | 2006.3(2) Å <sup>3</sup>                                             |                 |
| Z                                 | 2                                                                    |                 |
| Density (calculated)              | 1.448 Mg/m <sup>3</sup>                                              |                 |
| Absorption coefficient            | 0.889 mm <sup>-1</sup>                                               |                 |
| F(000)                            | 932                                                                  |                 |
| Crystal size                      | 0.09 x 0.07 x 0.06 mm <sup>3</sup>                                   |                 |
| Theta range for data collection   | 2.838 to 79.031°.                                                    |                 |
| Index ranges                      | -15 ≤ h ≤ 15, -12 ≤ k ≤ 13, -19 ≤ l ≤ 19                             |                 |
| Reflections collected             | 43703                                                                |                 |
| Independent reflections           | 8046 [R(int) = 0.0580]                                               |                 |
| Completeness to theta = 67.679°   | 98.5%                                                                |                 |
| Absorption correction             | Semi-empirical from equivalents                                      |                 |
| Max. and min. transmission        | 0.7437 and 0.6601                                                    |                 |
| Refinement method                 | Full-matrix least-squares on F <sup>2</sup>                          |                 |
| Data / restraints / parameters    | 8046 / 1 / 580                                                       |                 |
| Goodness-of-fit on F <sup>2</sup> | 1.064                                                                |                 |
| Final R indices [I > 2σ(I)]       | R1 = 0.0611, wR2 = 0.1539                                            |                 |
| R indices (all data)              | R1 = 0.0665, wR2 = 0.1597                                            |                 |
| Absolute structure parameter      | -0.02(6)                                                             |                 |
| Extinction coefficient            | n/a                                                                  |                 |
| Largest diff. peak and hole       | 0.828 and -0.464 e.Å <sup>-3</sup>                                   |                 |

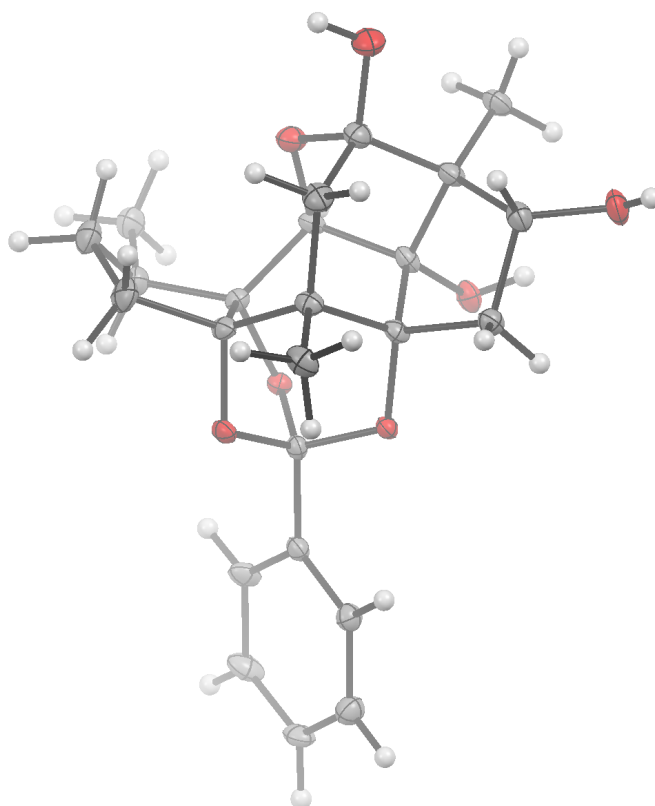

**Figure S6.** Structure of **S21** with 50% probability anisotropic displacement ellipsoids. Co-crystallized water and the second molecule of **S21** are omitted for clarity.

### Special Refinement Details for **S21**

Compound **S21** crystallizes in the monoclinic space group  $P12_11$  with two molecules in the asymmetric unit along with one molecule of water. The hydrogen atoms for all hydroxyl groups and the water molecule were not located in the difference Fourier synthesis and were included into the model at geometrically calculated positions and refined using a riding model. No hydrogen bond acceptor was found for H6A and H8A. Absolute configuration was determined by anomalous dispersion ( $Flack = -0.01(6)$ ).<sup>13</sup>

## 6. References

1. Koshimizu, M.; Nagatomo, M.; Inoue, M. Construction of a pentacyclic ring system of isoryanodane diterpenoids by SmI<sub>2</sub>-mediated transannular cyclization. *Tetrahedron* **2018**, *74*, 3384.
2. Shen, Y.; Li, L. B.; Pan, Z. S.; Wang, Y. L.; Li, J. D.; Wang, K. Y.; Wang, X. C.; Zhang, Y. Y.; Hu, T. H.; Zhang, Y. D. Protecting-group-free total synthesis of (-)-Jiadifenolide: development of a [4+1] annulation toward multisubstituted tetrahydrofurans. *Org. Lett.* **2015**, *17*, 5480.
3. Niwa, H.; Kunitani, K.; Nagoya, T.; Yamada, K. Enantioselective synthesis of the macrocyclic pyrrolizidine alkaloid yamataimine. *Bull. Chem. Soc. Jpn.* **1994**, *67*, 3094.
4. Nwoye, E. O.; Dudley, G. B. Synthesis of *para*-methoxybenzyl (PMB) ethers under neutral conditions. *Chem. Commun.* **2007**, 1436.
5. Stewart, C. A.; Peng, X. W.; Paquette, L. A. An efficient means for generating *p*-methoxybenzyl (PMB) ethers under mildly acidic conditions. *Synthesis* **2008**, 433.
6. Murray, R. W.; Singh, M. Synthesis of epoxides using dimethyldioxirane: *trans*-stilbene oxide. *Org. Synth.* **1997**, *74*, 91.
7. Krasovskiy, A.; Kopp, F.; Knochel, P. Soluble lanthanide salts LnCl<sub>3</sub>•2LiCl for the improved addition of organomagnesium reagents to carbonyl compounds. *Angew. Chem. Int. Ed.* **2006**, *45*, 497.
8. Xu, C.; Han, A.; Virgil, S. C.; Reisman, S. E. Chemical synthesis of (+)-Ryanodine and (+)-20-Deoxyispiganthine. *ACS. Cent. Sci.* **2017**, *3*, 278.
9. APEX2, Version 2 User Manual, M86-E01078. Bruker Analytical X-ray Systems: Madison, WI.
10. Sheldrick, G. M. SADABS (version 2008/1): Program for Absorption Correction for Data from Area Detector Frames. University of Göttingen, 2008.
11. Sheldrick, G. M. A short history of SHELX. *Acta Cryst.* **2008**, *64*, 112.
12. Müller, P. Practical suggestions for better crystal structures. *Crystallogr. Rev.* **2009**, *15*, 57.
13. Parsons, S.; Flack, H. D.; Wagner, T. Use of intensity quotients and differences in absolute structure refinement. *Acta Cryst.* **2013**, *69*, 249.

## 7. <sup>1</sup>H and <sup>13</sup>C NMR Spectral Data

S41

Data File Name / Volumes/nmrdata-1/ ytao/ nmr/ 2-YT-203P/ 1/ fid  
Title 2-YT-203P.1.fid  
Origin Bruker BioSpin GmbH  
Solvent CDCl<sub>3</sub>  
Temperature 298.0  
Pulse Sequence zg30  
Number of Scans 16  
Receiver Gain 101.0  
Relaxation Delay 1.0000  
Pulse Width 9.7500  
Acquisition Time 3.9977  
Acquisition Date 2019-05-07T18:00:20  
Spectrometer Frequency 400.15  
Spectral Width 8196.7  
Lowest Frequency -1637.1  
Nucleus <sup>1</sup>H  
Acquired Size 32768  
Spectral Size 65536

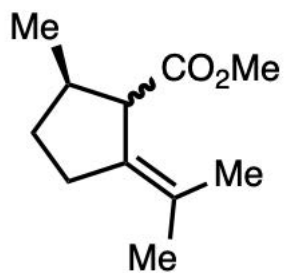

methyl pulegenate (12)

1.3:1 dr

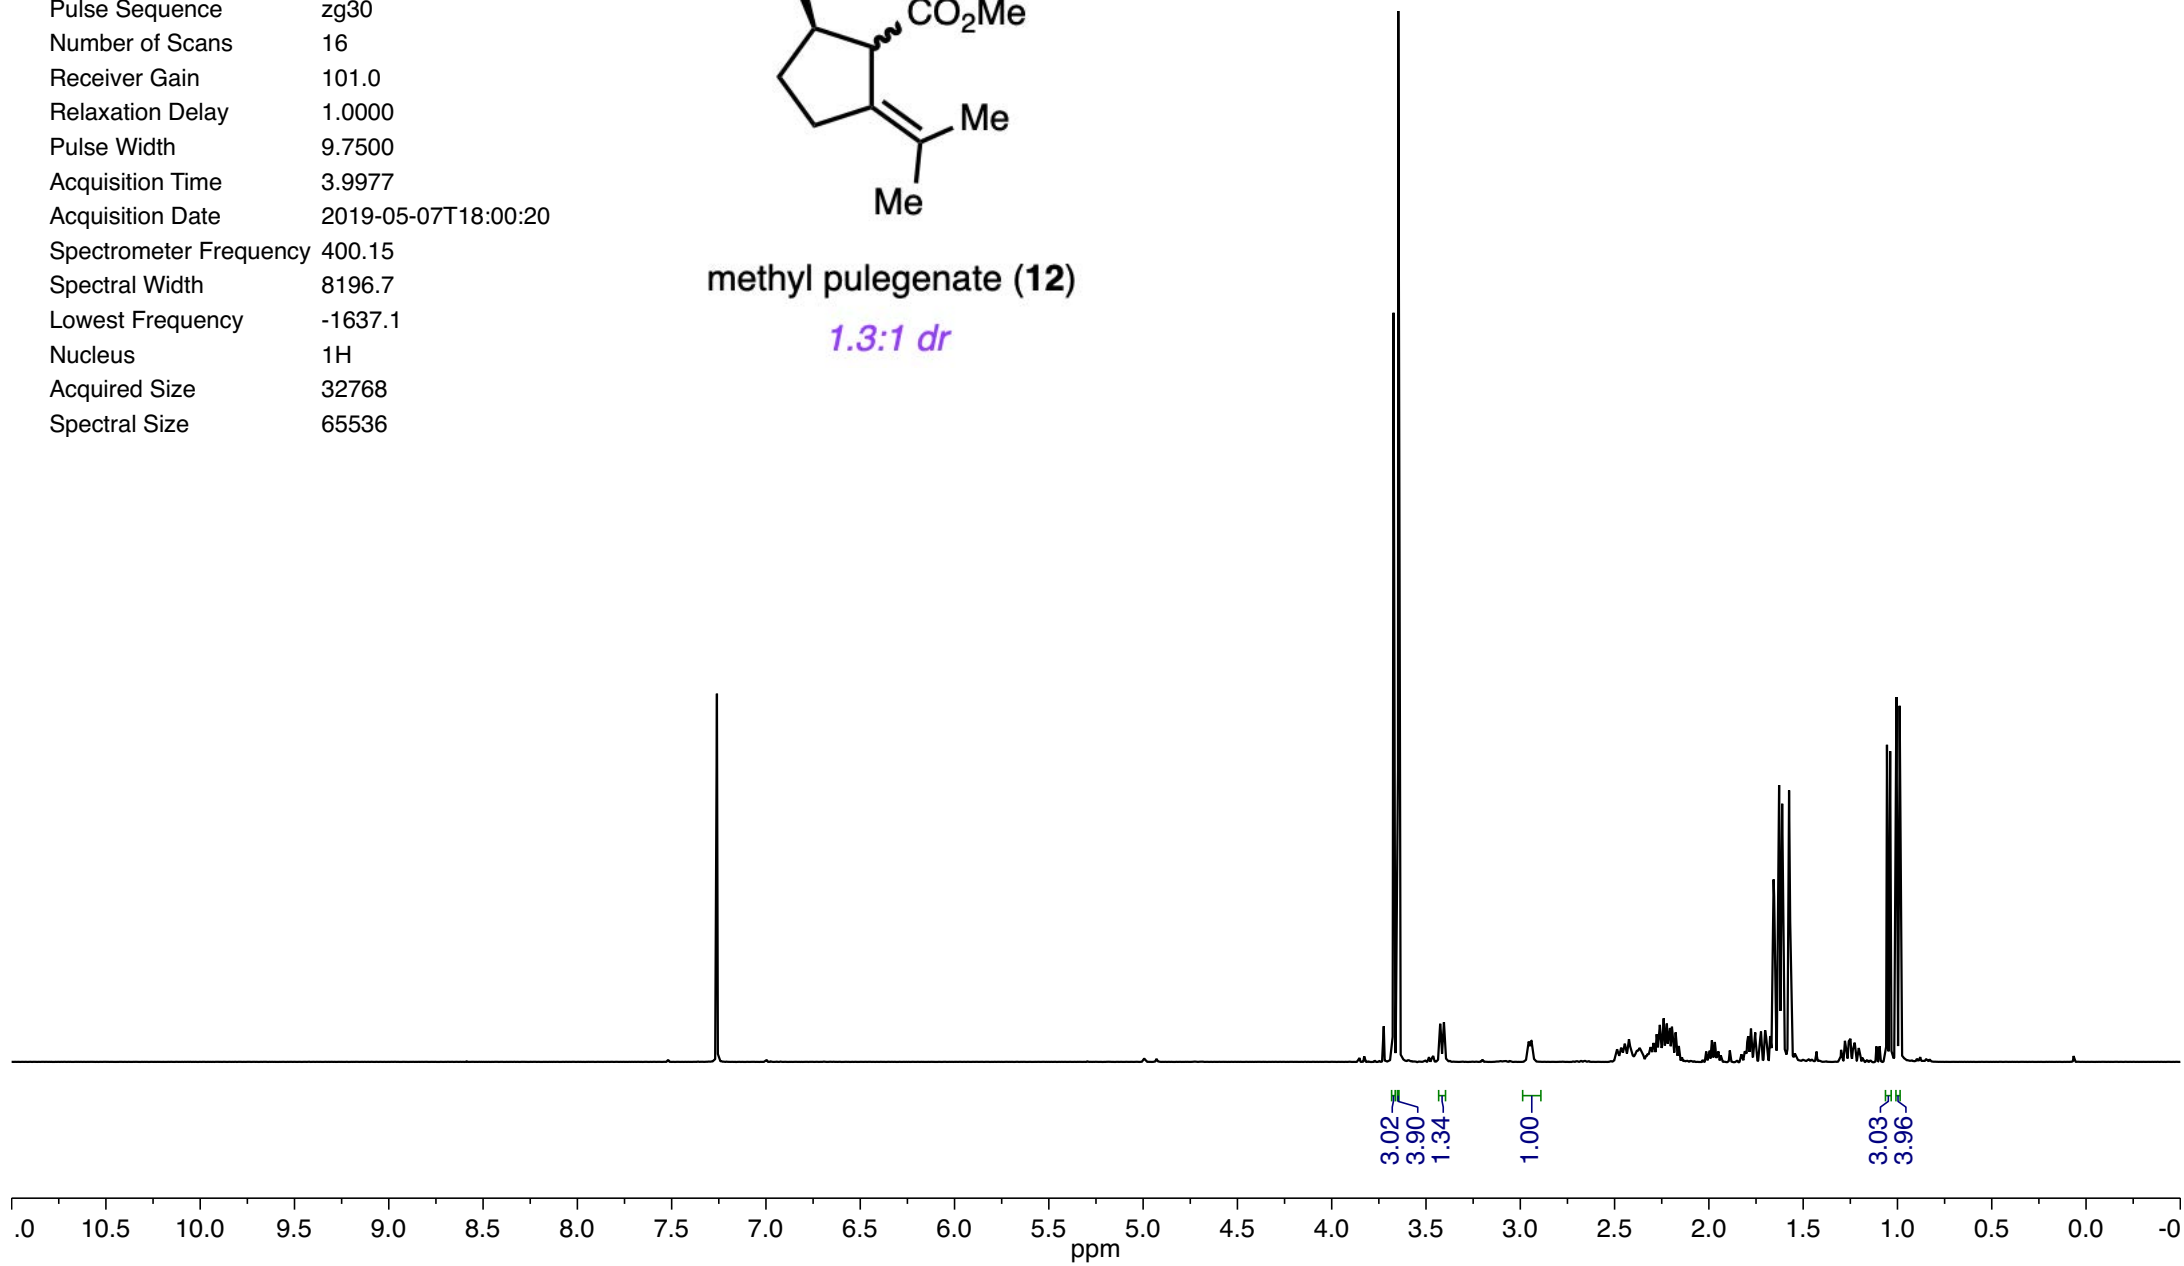

| Parameter              | Value                                             |
|------------------------|---------------------------------------------------|
| Data File Name         | / Volumes/ nmrdata-1/ ytao/ nmr/ 2-YT-203/ 2/ fid |
| Title                  | 2-YT-203.2.fid                                    |
| Origin                 | Bruker BioSpin GmbH                               |
| Solvent                | CDCl3                                             |
| Temperature            | 298.0                                             |
| Pulse Sequence         | zgpg30                                            |
| Number of Scans        | 128                                               |
| Receiver Gain          | 54.3                                              |
| Relaxation Delay       | 2.0000                                            |
| Pulse Width            | 10.0000                                           |
| Acquisition Time       | 1.3763                                            |
| Acquisition Date       | 2019-05-07T17:31:50                               |
| Spectrometer Frequency | 100.63                                            |
| Spectral Width         | 23809.5                                           |
| Lowest Frequency       | -1845.8                                           |
| Nucleus                | <sup>13</sup> C                                   |
| Acquired Size          | 32768                                             |
| Spectral Size          | 65536                                             |

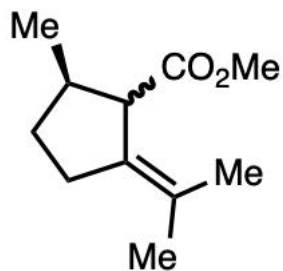methyl puleginate (**12**)*1.3:1 dr*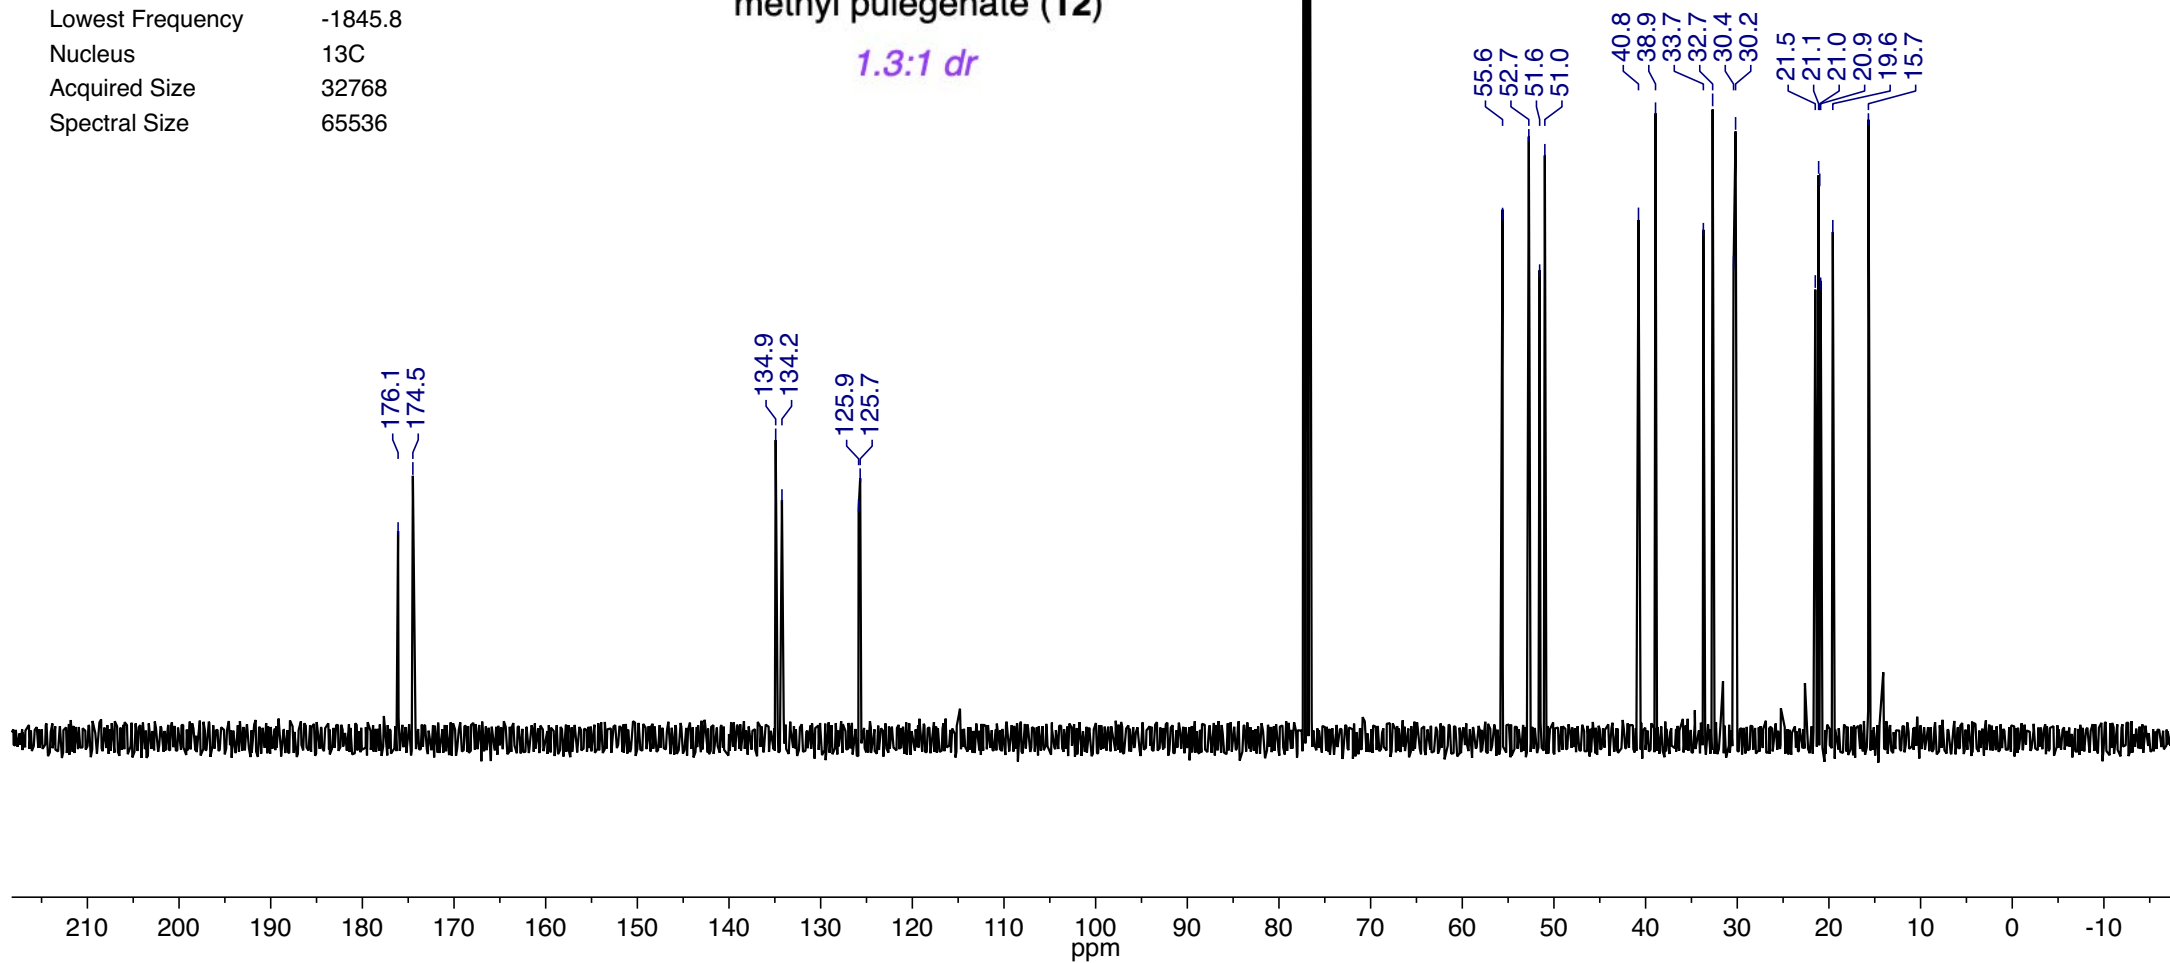

| Parameter              | Value                                                           |
|------------------------|-----------------------------------------------------------------|
| Data File Name         | /Volumes/nmrdata/ahan/vnmrsys/data/3-AH-044-CH/PROTON01.fid/fid |
| Title                  | PROTON01                                                        |
| Origin                 | Varian                                                          |
| Solvent                | CDCl3                                                           |
| Temperature            | 25.0                                                            |
| Pulse Sequence         | s2pul                                                           |
| Number of Scans        | 8                                                               |
| Receiver Gain          | 34                                                              |
| Relaxation Delay       | 1.0000                                                          |
| Pulse Width            | 4.2500                                                          |
| Acquisition Time       | 2.5559                                                          |
| Acquisition Date       | 2015-03-14T14:02:38                                             |
| Spectrometer Frequency | 399.80                                                          |
| Spectral Width         | 6410.3                                                          |
| Lowest Frequency       | -806.8                                                          |
| Nucleus                | 1H                                                              |
| Acquired Size          | 16384                                                           |
| Spectral Size          | 65536                                                           |

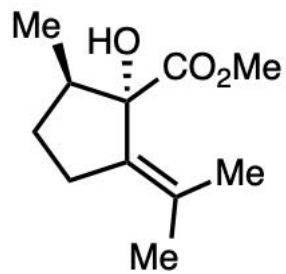**13**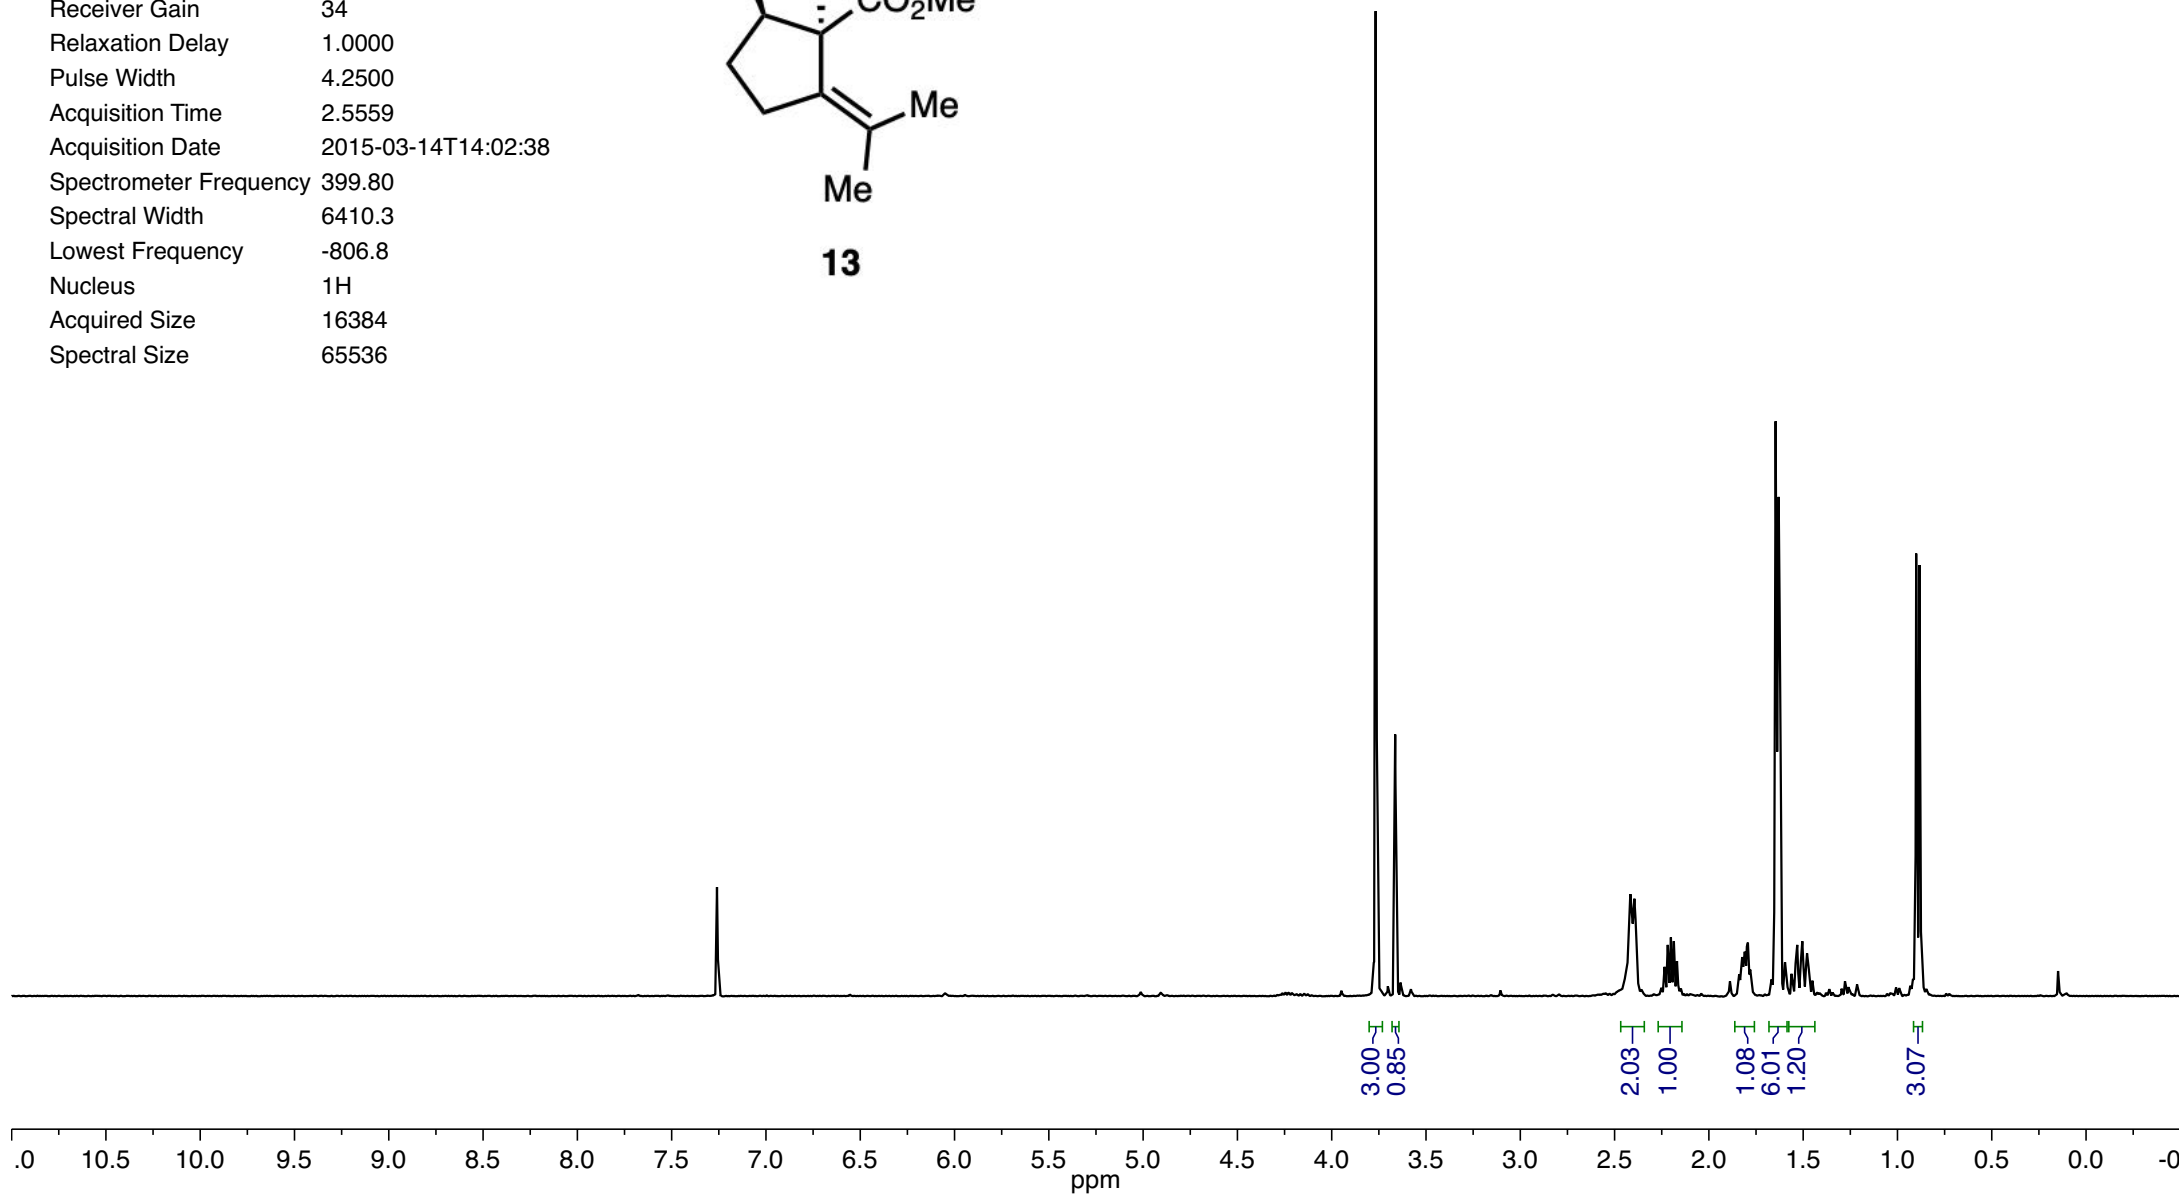

| Parameter              | Value                                                           |
|------------------------|-----------------------------------------------------------------|
| Data File Name         | /Volumes/nmrdata/ahan/vnmrsys/data/3-AH-044-CH/CARBON01.fid/fid |
| Title                  | CARBON01                                                        |
| Origin                 | Varian                                                          |
| Solvent                | CDCl3                                                           |
| Temperature            | 25.0                                                            |
| Pulse Sequence         | s2pul                                                           |
| Number of Scans        | 1000                                                            |
| Receiver Gain          | 30                                                              |
| Relaxation Delay       | 1.0000                                                          |
| Pulse Width            | 3.4500                                                          |
| Acquisition Time       | 1.3107                                                          |
| Acquisition Date       | 2015-03-14T14:03:19                                             |
| Spectrometer Frequency | 100.54                                                          |
| Spectral Width         | 25000.0                                                         |
| Lowest Frequency       | -1442.8                                                         |
| Nucleus                | <sup>13</sup> C                                                 |
| Acquired Size          | 32768                                                           |
| Spectral Size          | 65536                                                           |

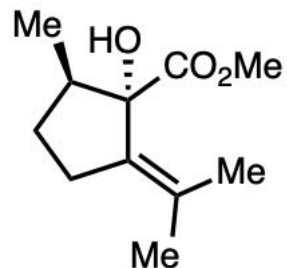**13**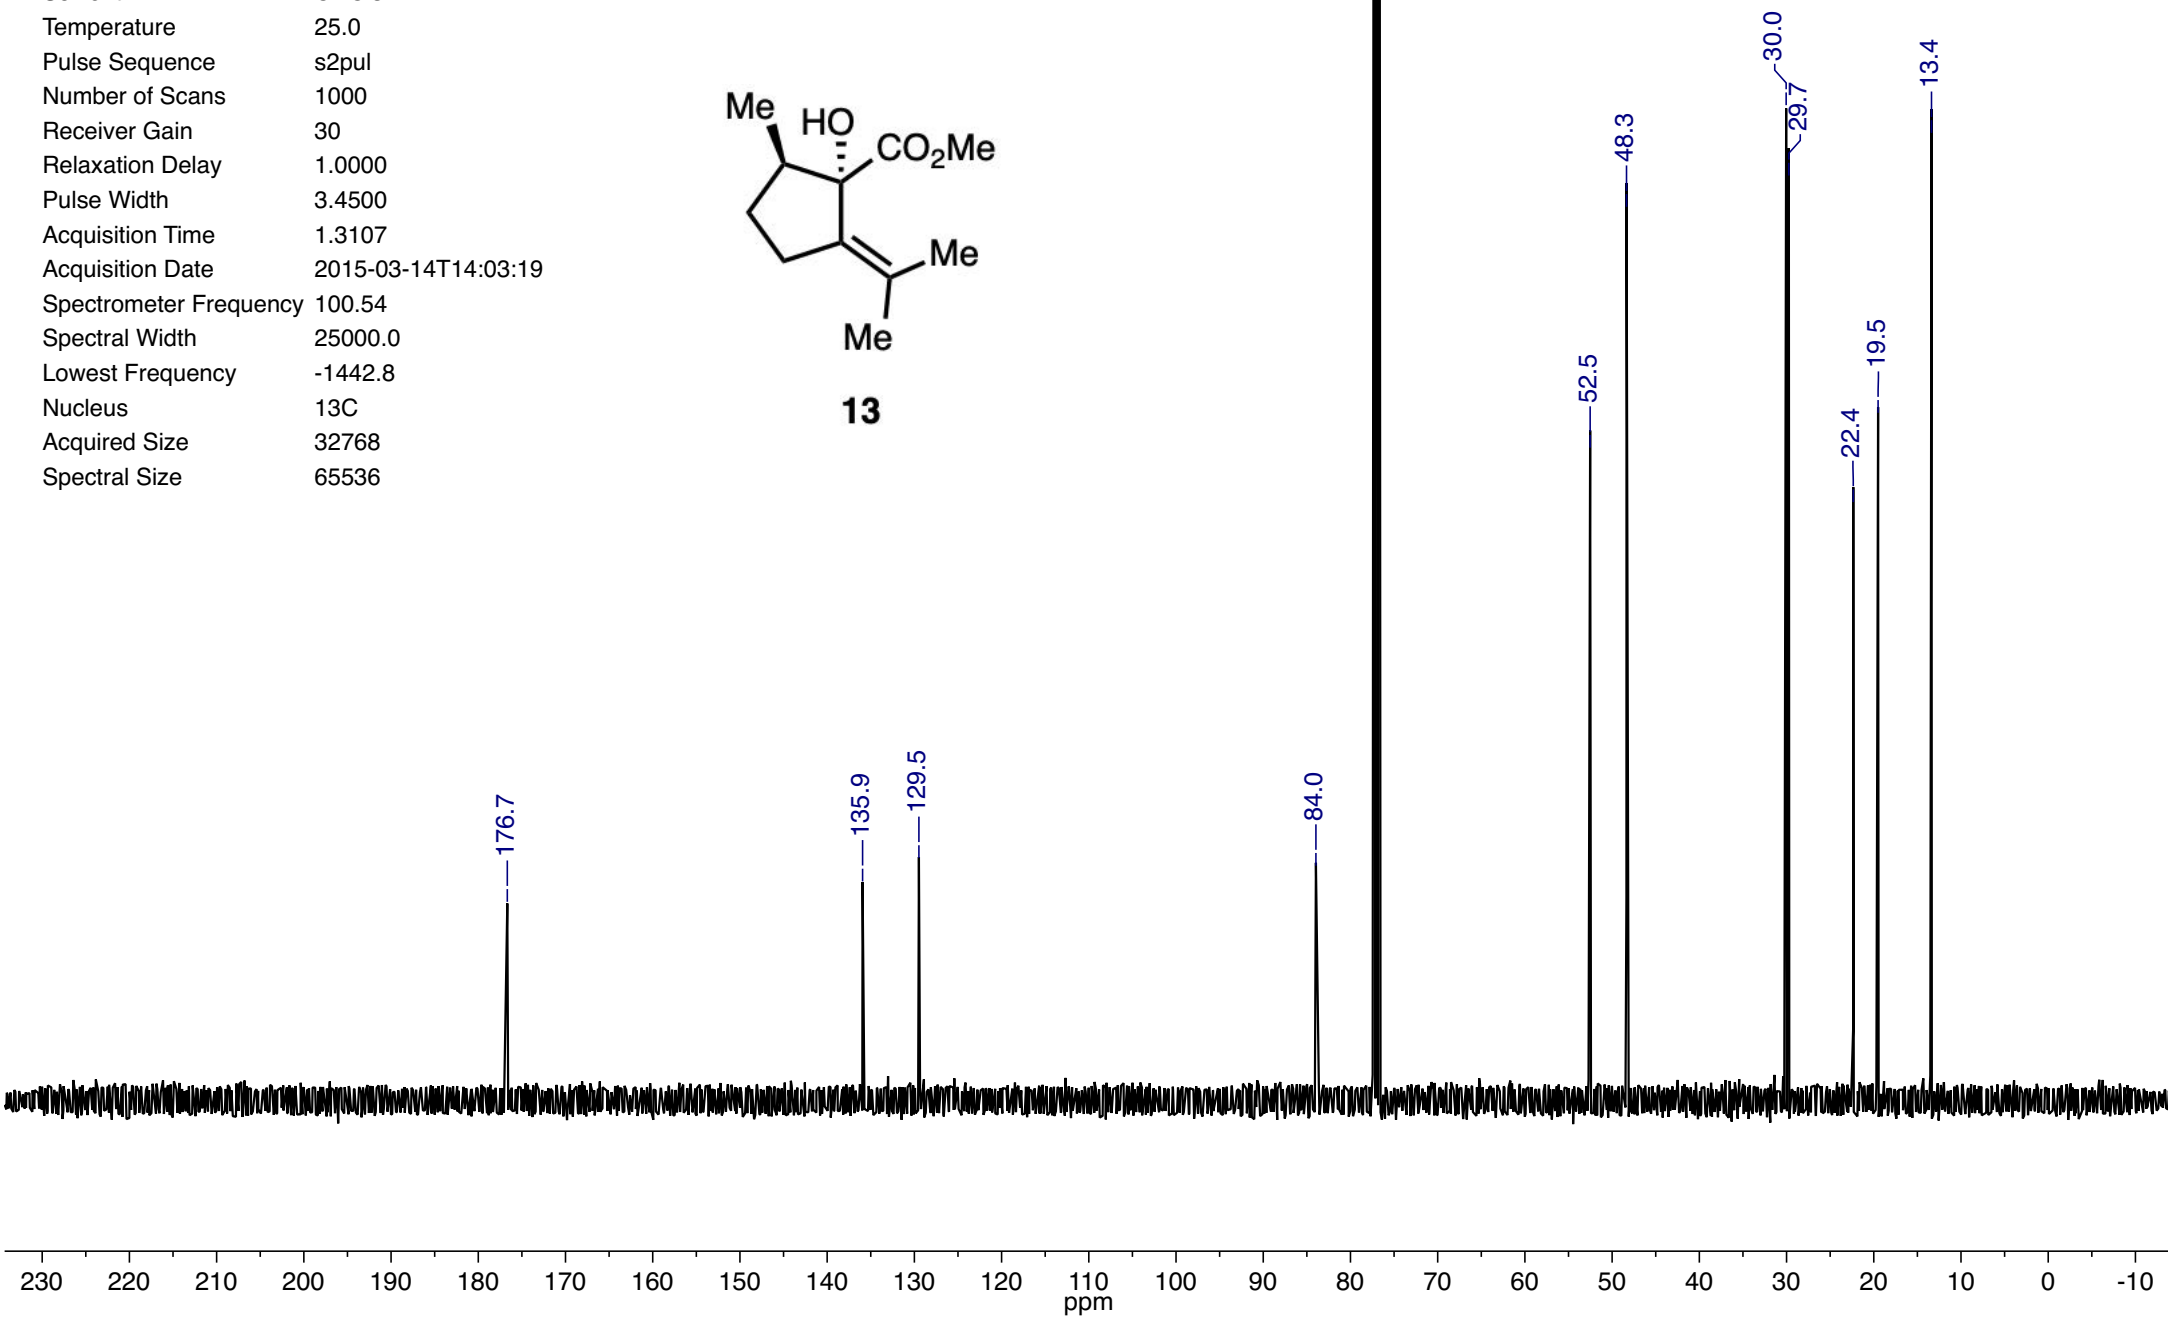



| Parameter              | Value                                                           |
|------------------------|-----------------------------------------------------------------|
| Data File Name         | /Volumes/nmrdata/ahan/vnmrsys/data/3-AH-045-CH/PROTON01.fid/fid |
| Title                  | PROTON01                                                        |
| Origin                 | Varian                                                          |
| Solvent                | CDCl3                                                           |
| Temperature            | 25.0                                                            |
| Pulse Sequence         | s2pul                                                           |
| Number of Scans        | 8                                                               |
| Receiver Gain          | 34                                                              |
| Relaxation Delay       | 1.0000                                                          |
| Pulse Width            | 4.2500                                                          |
| Acquisition Time       | 2.5559                                                          |
| Acquisition Date       | 2015-03-14T19:03:33                                             |
| Spectrometer Frequency | 399.80                                                          |
| Spectral Width         | 6410.3                                                          |
| Lowest Frequency       | -806.0                                                          |
| Nucleus                | 1H                                                              |
| Acquired Size          | 16384                                                           |
| Spectral Size          | 65536                                                           |

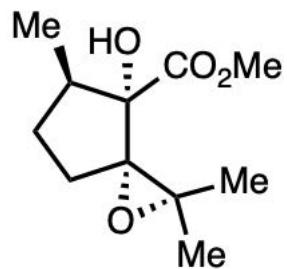**14**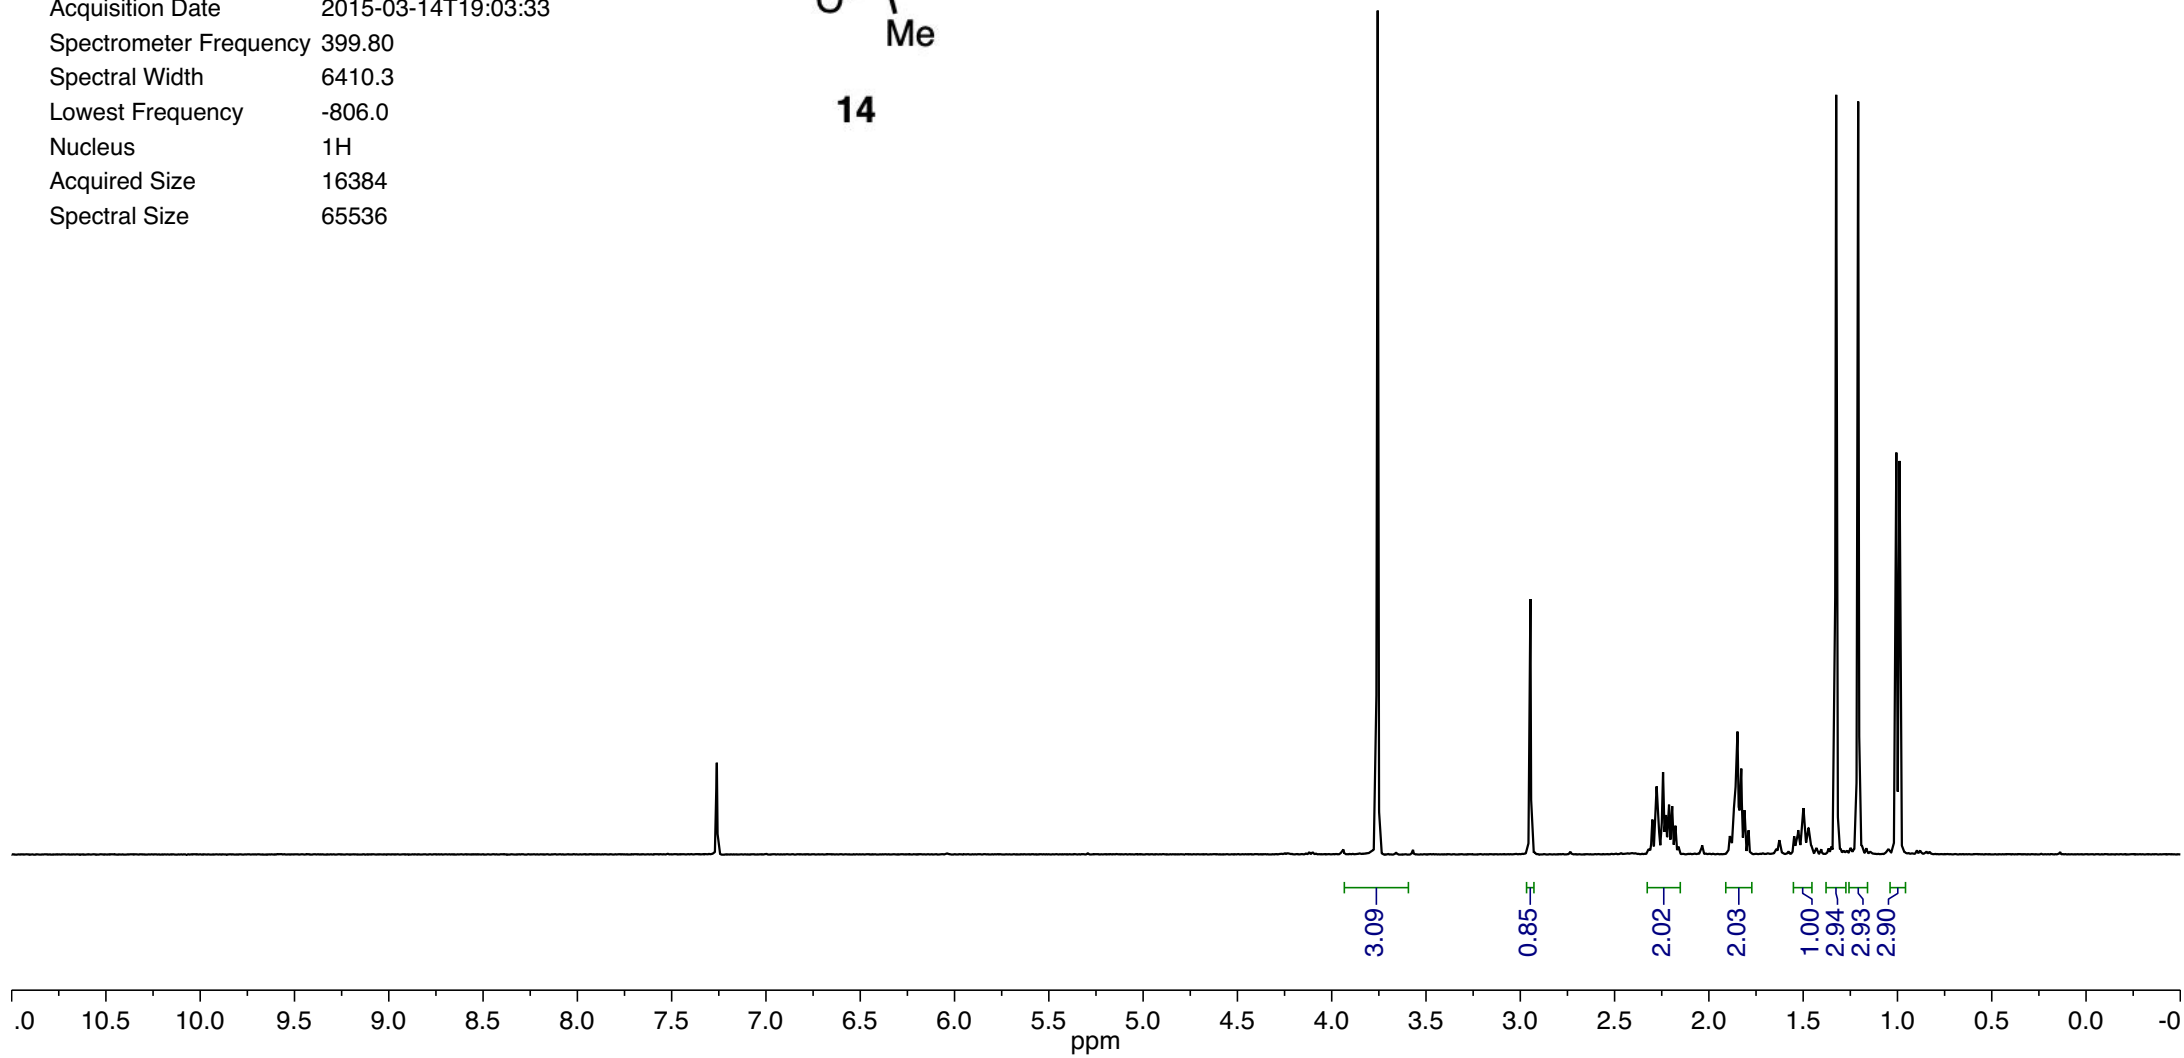

| Parameter              | Value                                                                   |
|------------------------|-------------------------------------------------------------------------|
| Data File Name         | / Volumes/ nmrdata/ ahan/ vnmrsys/ data/ 3-AH-045-CH/ CARBON01.fid/ fid |
| Title                  | CARBON01                                                                |
| Origin                 | Varian                                                                  |
| Solvent                | CDCl3                                                                   |
| Temperature            | 25.0                                                                    |
| Pulse Sequence         | s2pul                                                                   |
| Number of Scans        | 1000                                                                    |
| Receiver Gain          | 30                                                                      |
| Relaxation Delay       | 1.0000                                                                  |
| Pulse Width            | 3.4500                                                                  |
| Acquisition Time       | 1.3107                                                                  |
| Acquisition Date       | 2015-03-14T19:04:21                                                     |
| Spectrometer Frequency | 100.54                                                                  |
| Spectral Width         | 25000.0                                                                 |
| Lowest Frequency       | -1443.1                                                                 |
| Nucleus                | <sup>13</sup> C                                                         |
| Acquired Size          | 32768                                                                   |
| Spectral Size          | 65536                                                                   |

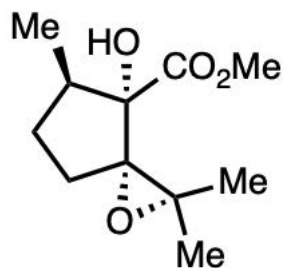**14**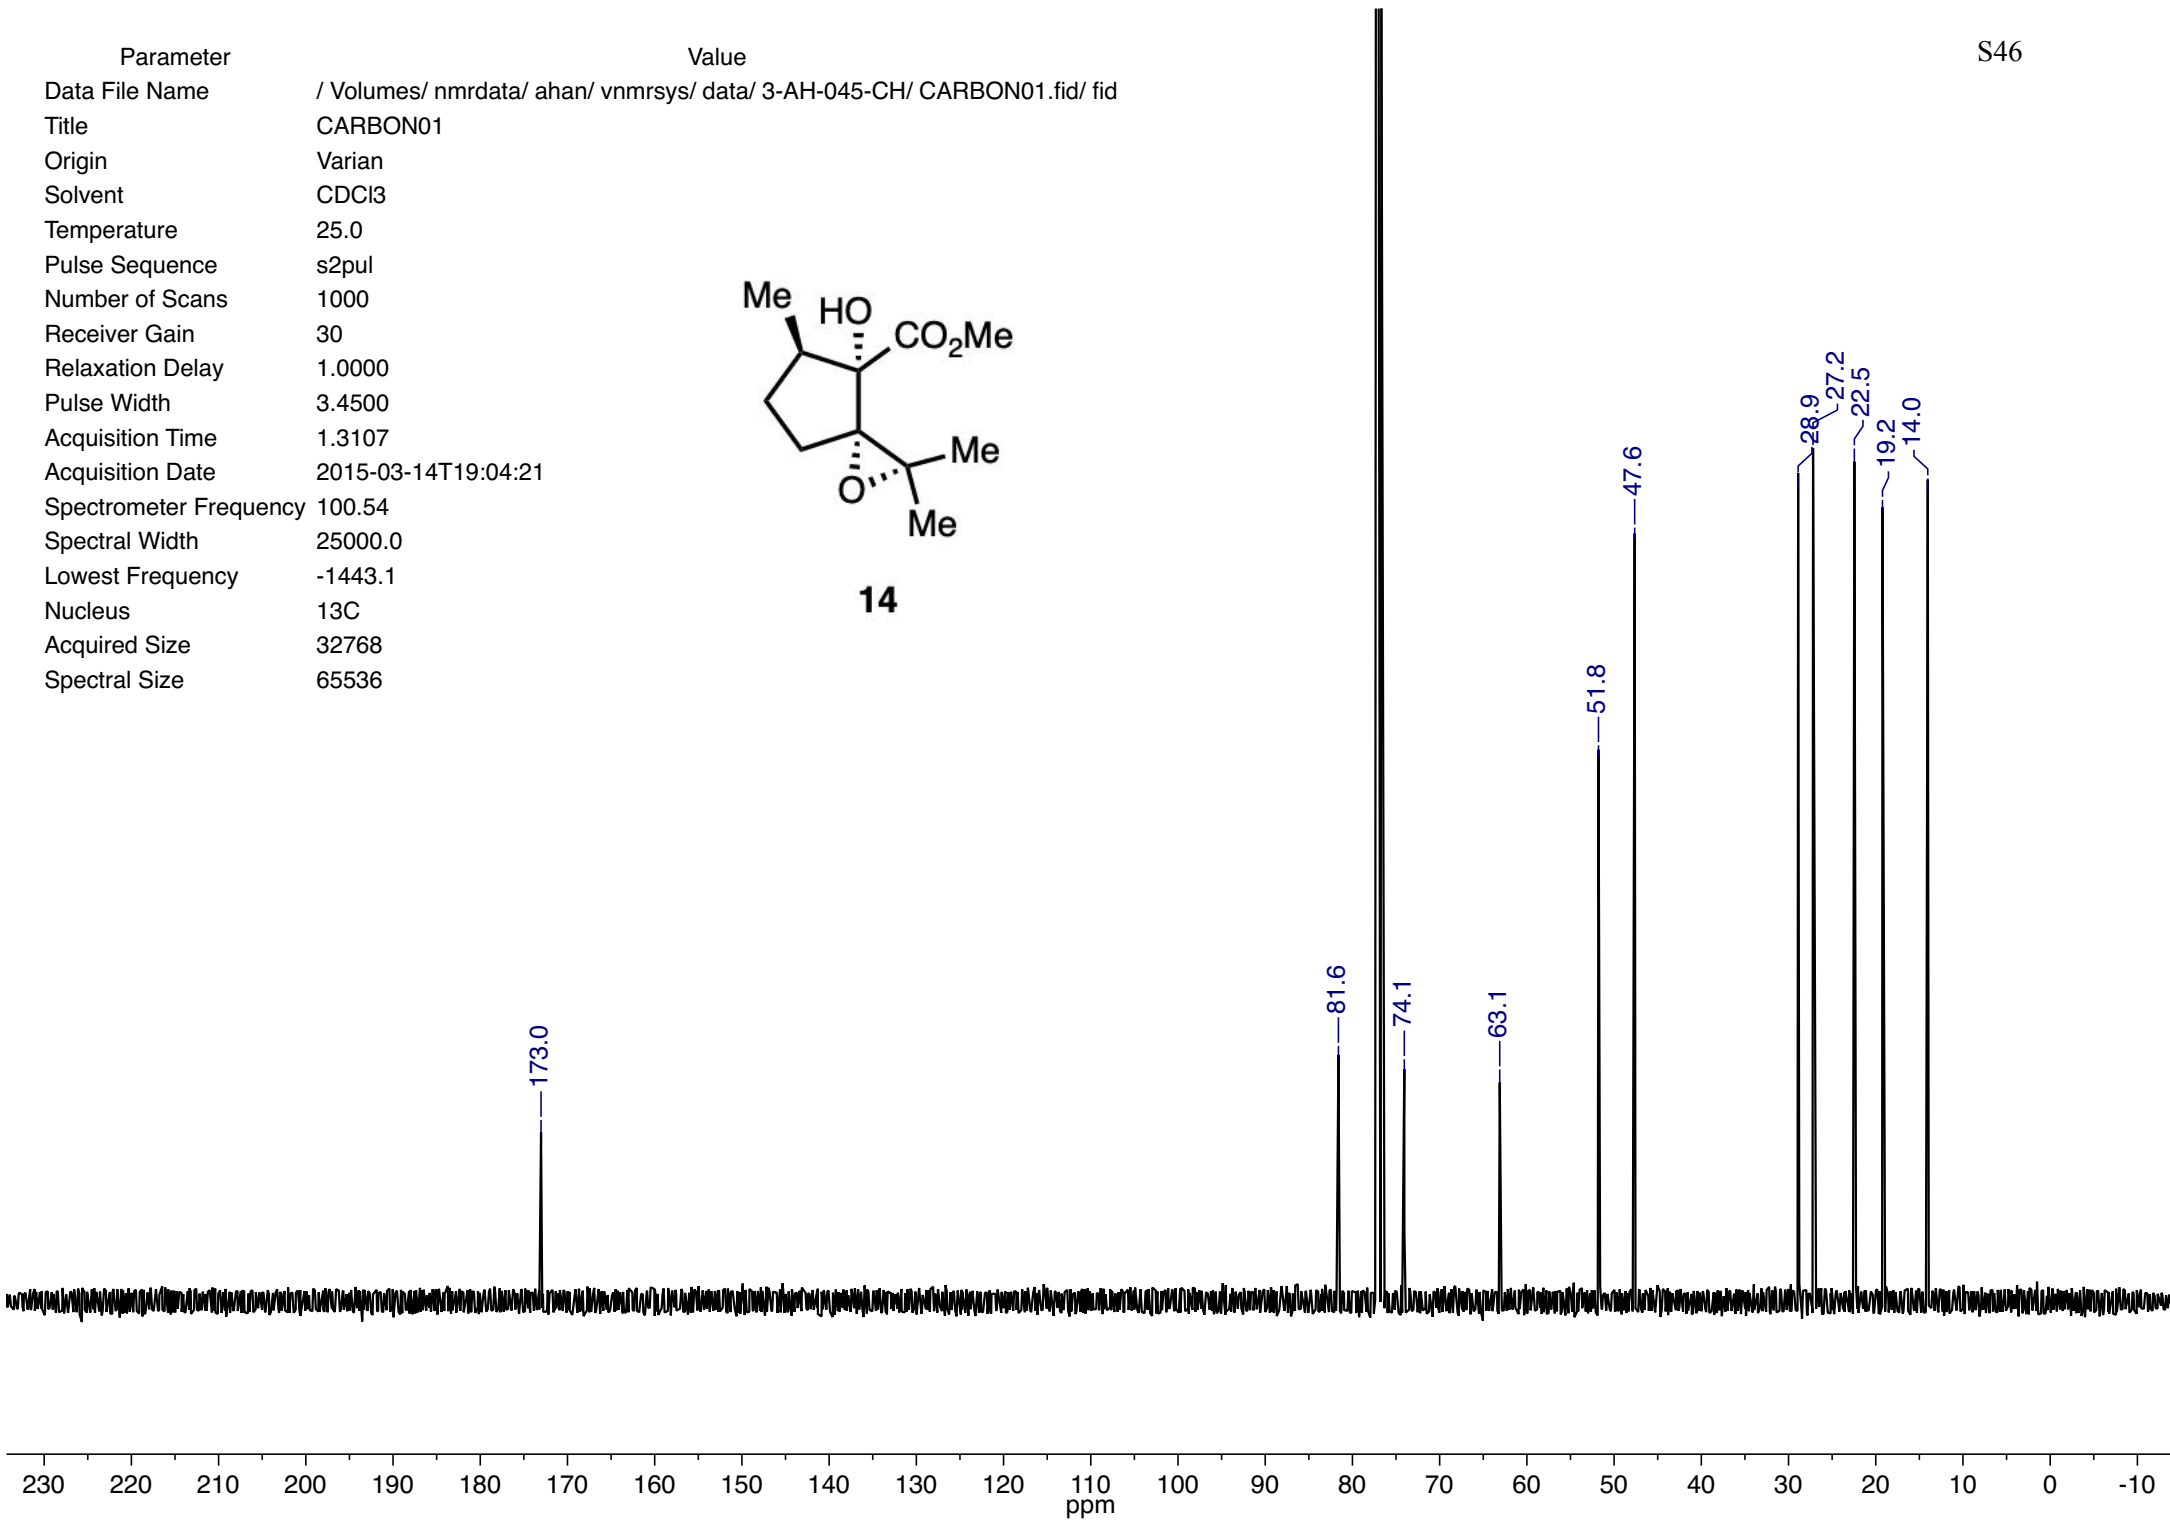

| Parameter              | Value                                                |
|------------------------|------------------------------------------------------|
| Data File Name         | / Volumes/ nmrdata-1/ ahan/ nmr/ 3-AH-046-CH/ 1/ fid |
| Title                  | 3-AH-046-CH.1.fid                                    |
| Origin                 | Bruker BioSpin GmbH                                  |
| Solvent                | CDCl3                                                |
| Temperature            | 298.2                                                |
| Pulse Sequence         | zg30                                                 |
| Number of Scans        | 8                                                    |
| Receiver Gain          | 156.2                                                |
| Relaxation Delay       | 1.0000                                               |
| Pulse Width            | 11.7000                                              |
| Acquisition Time       | 4.0894                                               |
| Acquisition Date       | 2015-03-15T16:16:00                                  |
| Spectrometer Frequency | 400.13                                               |
| Spectral Width         | 8012.8                                               |
| Lowest Frequency       | -1545.4                                              |
| Nucleus                | 1H                                                   |
| Acquired Size          | 32768                                                |
| Spectral Size          | 65536                                                |

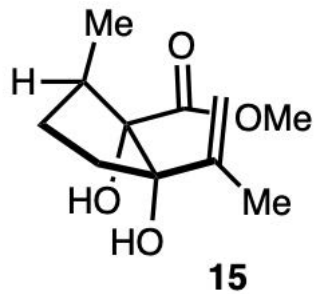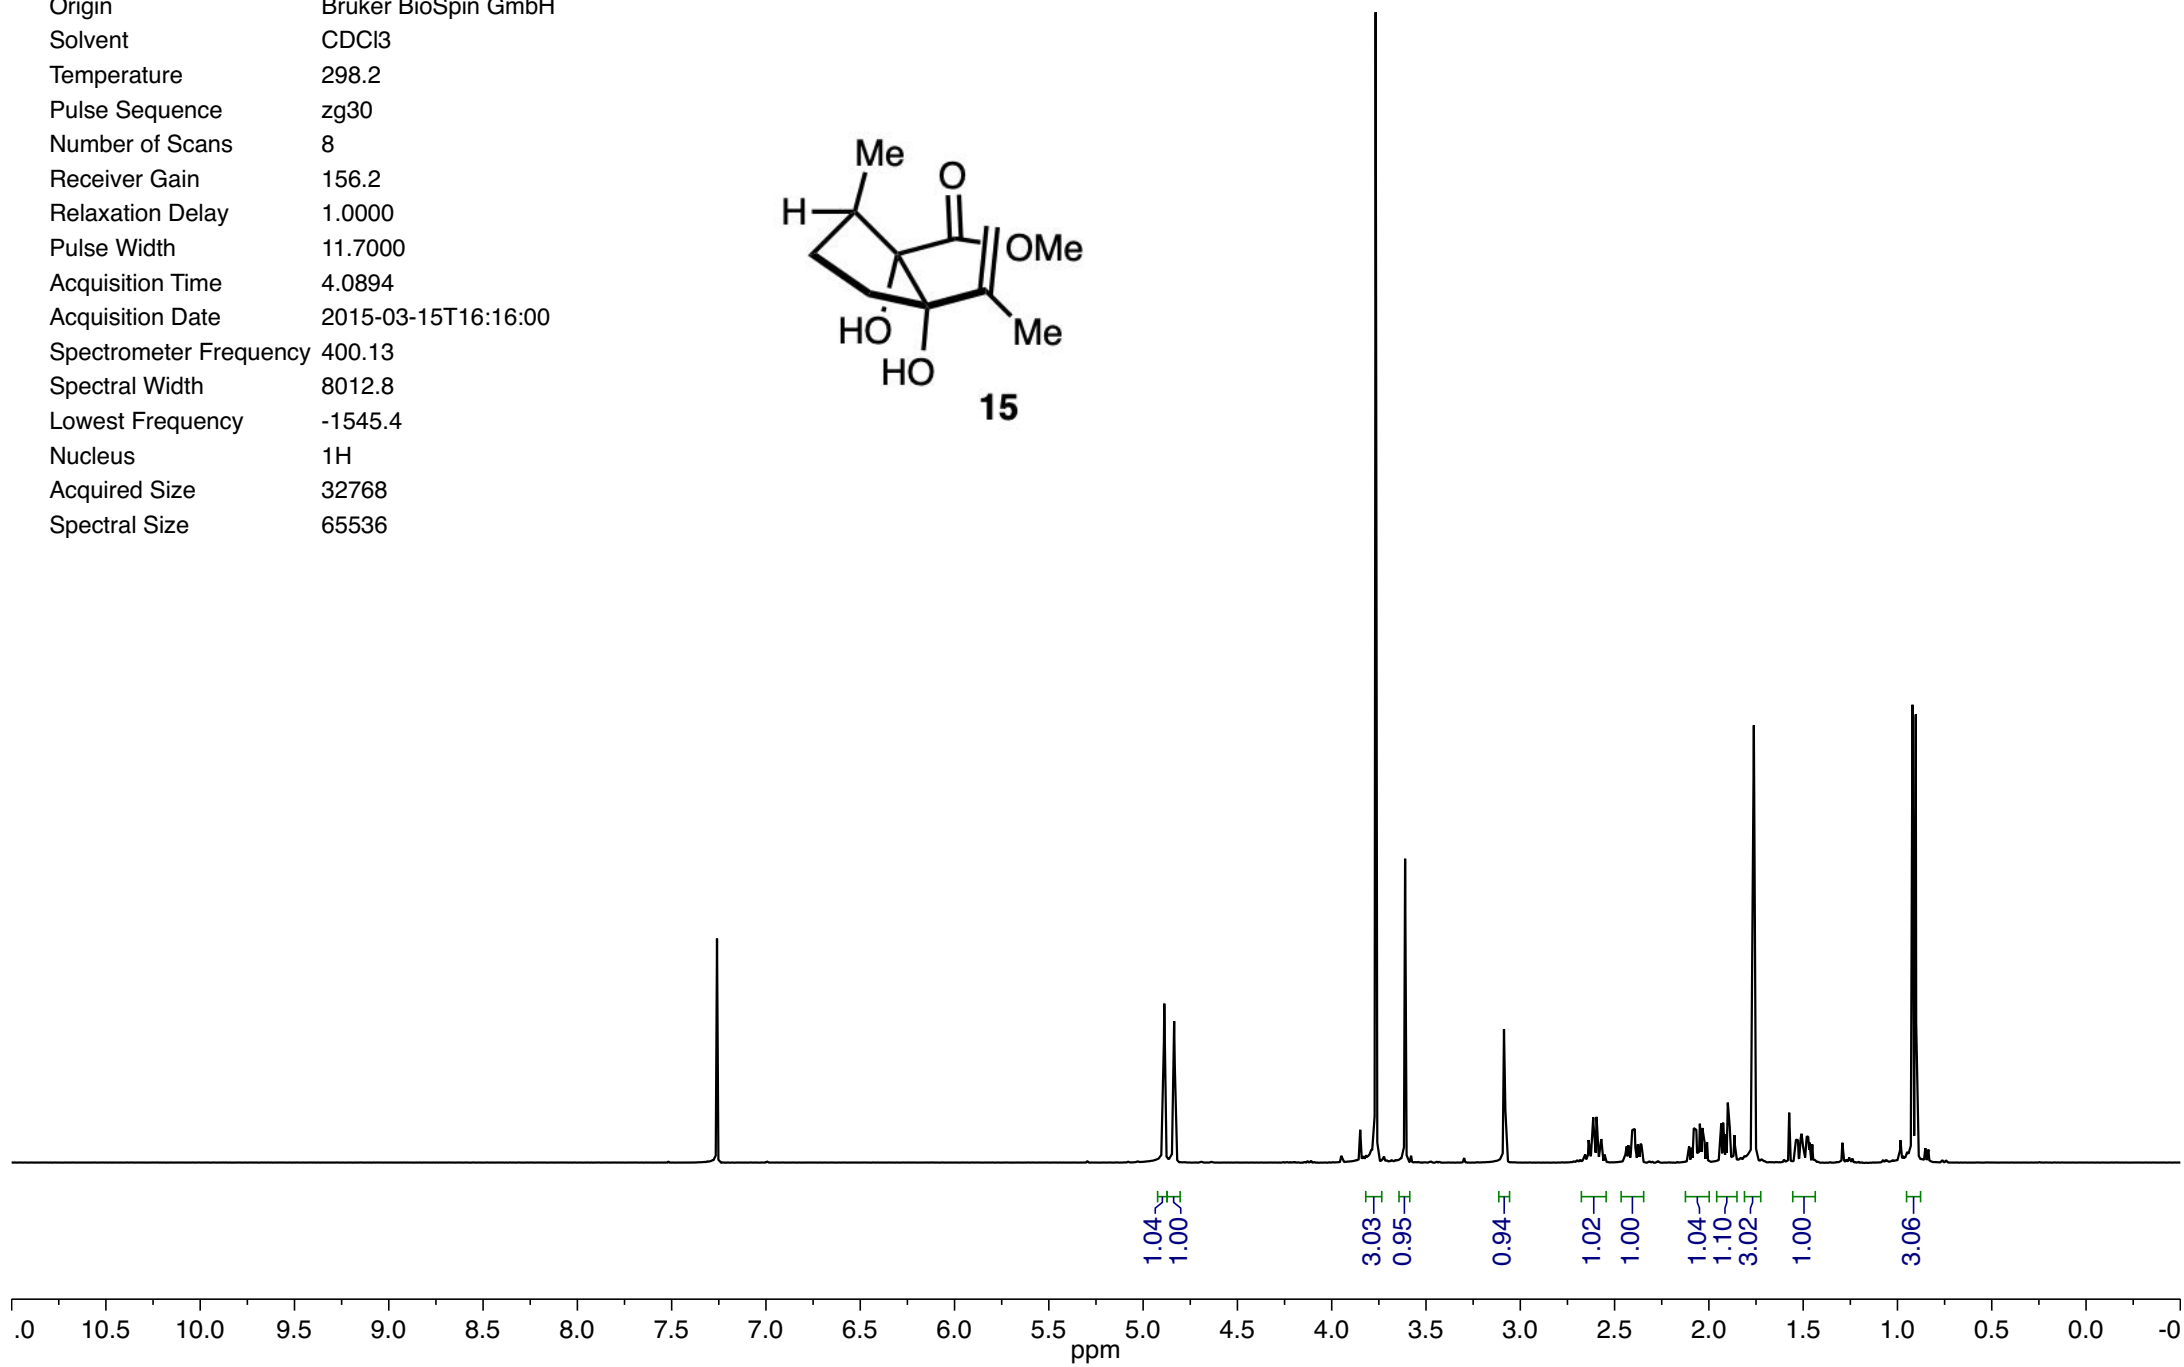

| Parameter              | Value                                              |
|------------------------|----------------------------------------------------|
| Data File Name         | /Volumes/nmrdata-1/ ahan/ nmr/ 3-AH-046-CH/ 2/ fid |
| Title                  | 3-AH-046-CH.2.fid                                  |
| Origin                 | Bruker BioSpin GmbH                                |
| Solvent                | CDCl <sub>3</sub>                                  |
| Temperature            | 298.2                                              |
| Pulse Sequence         | zgpg30                                             |
| Number of Scans        | 768                                                |
| Receiver Gain          | 72.0                                               |
| Relaxation Delay       | 2.0000                                             |
| Pulse Width            | 10.0000                                            |
| Acquisition Time       | 1.3631                                             |
| Acquisition Date       | 2015-03-15T15:38:00                                |
| Spectrometer Frequency | 100.62                                             |
| Spectral Width         | 24038.5                                            |
| Lowest Frequency       | -1959.8                                            |
| Nucleus                | <sup>13</sup> C                                    |
| Acquired Size          | 32768                                              |
| Spectral Size          | 65536                                              |

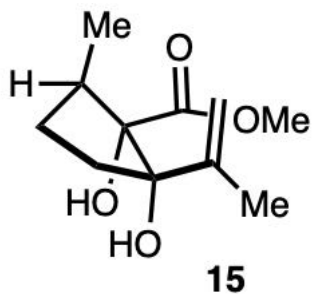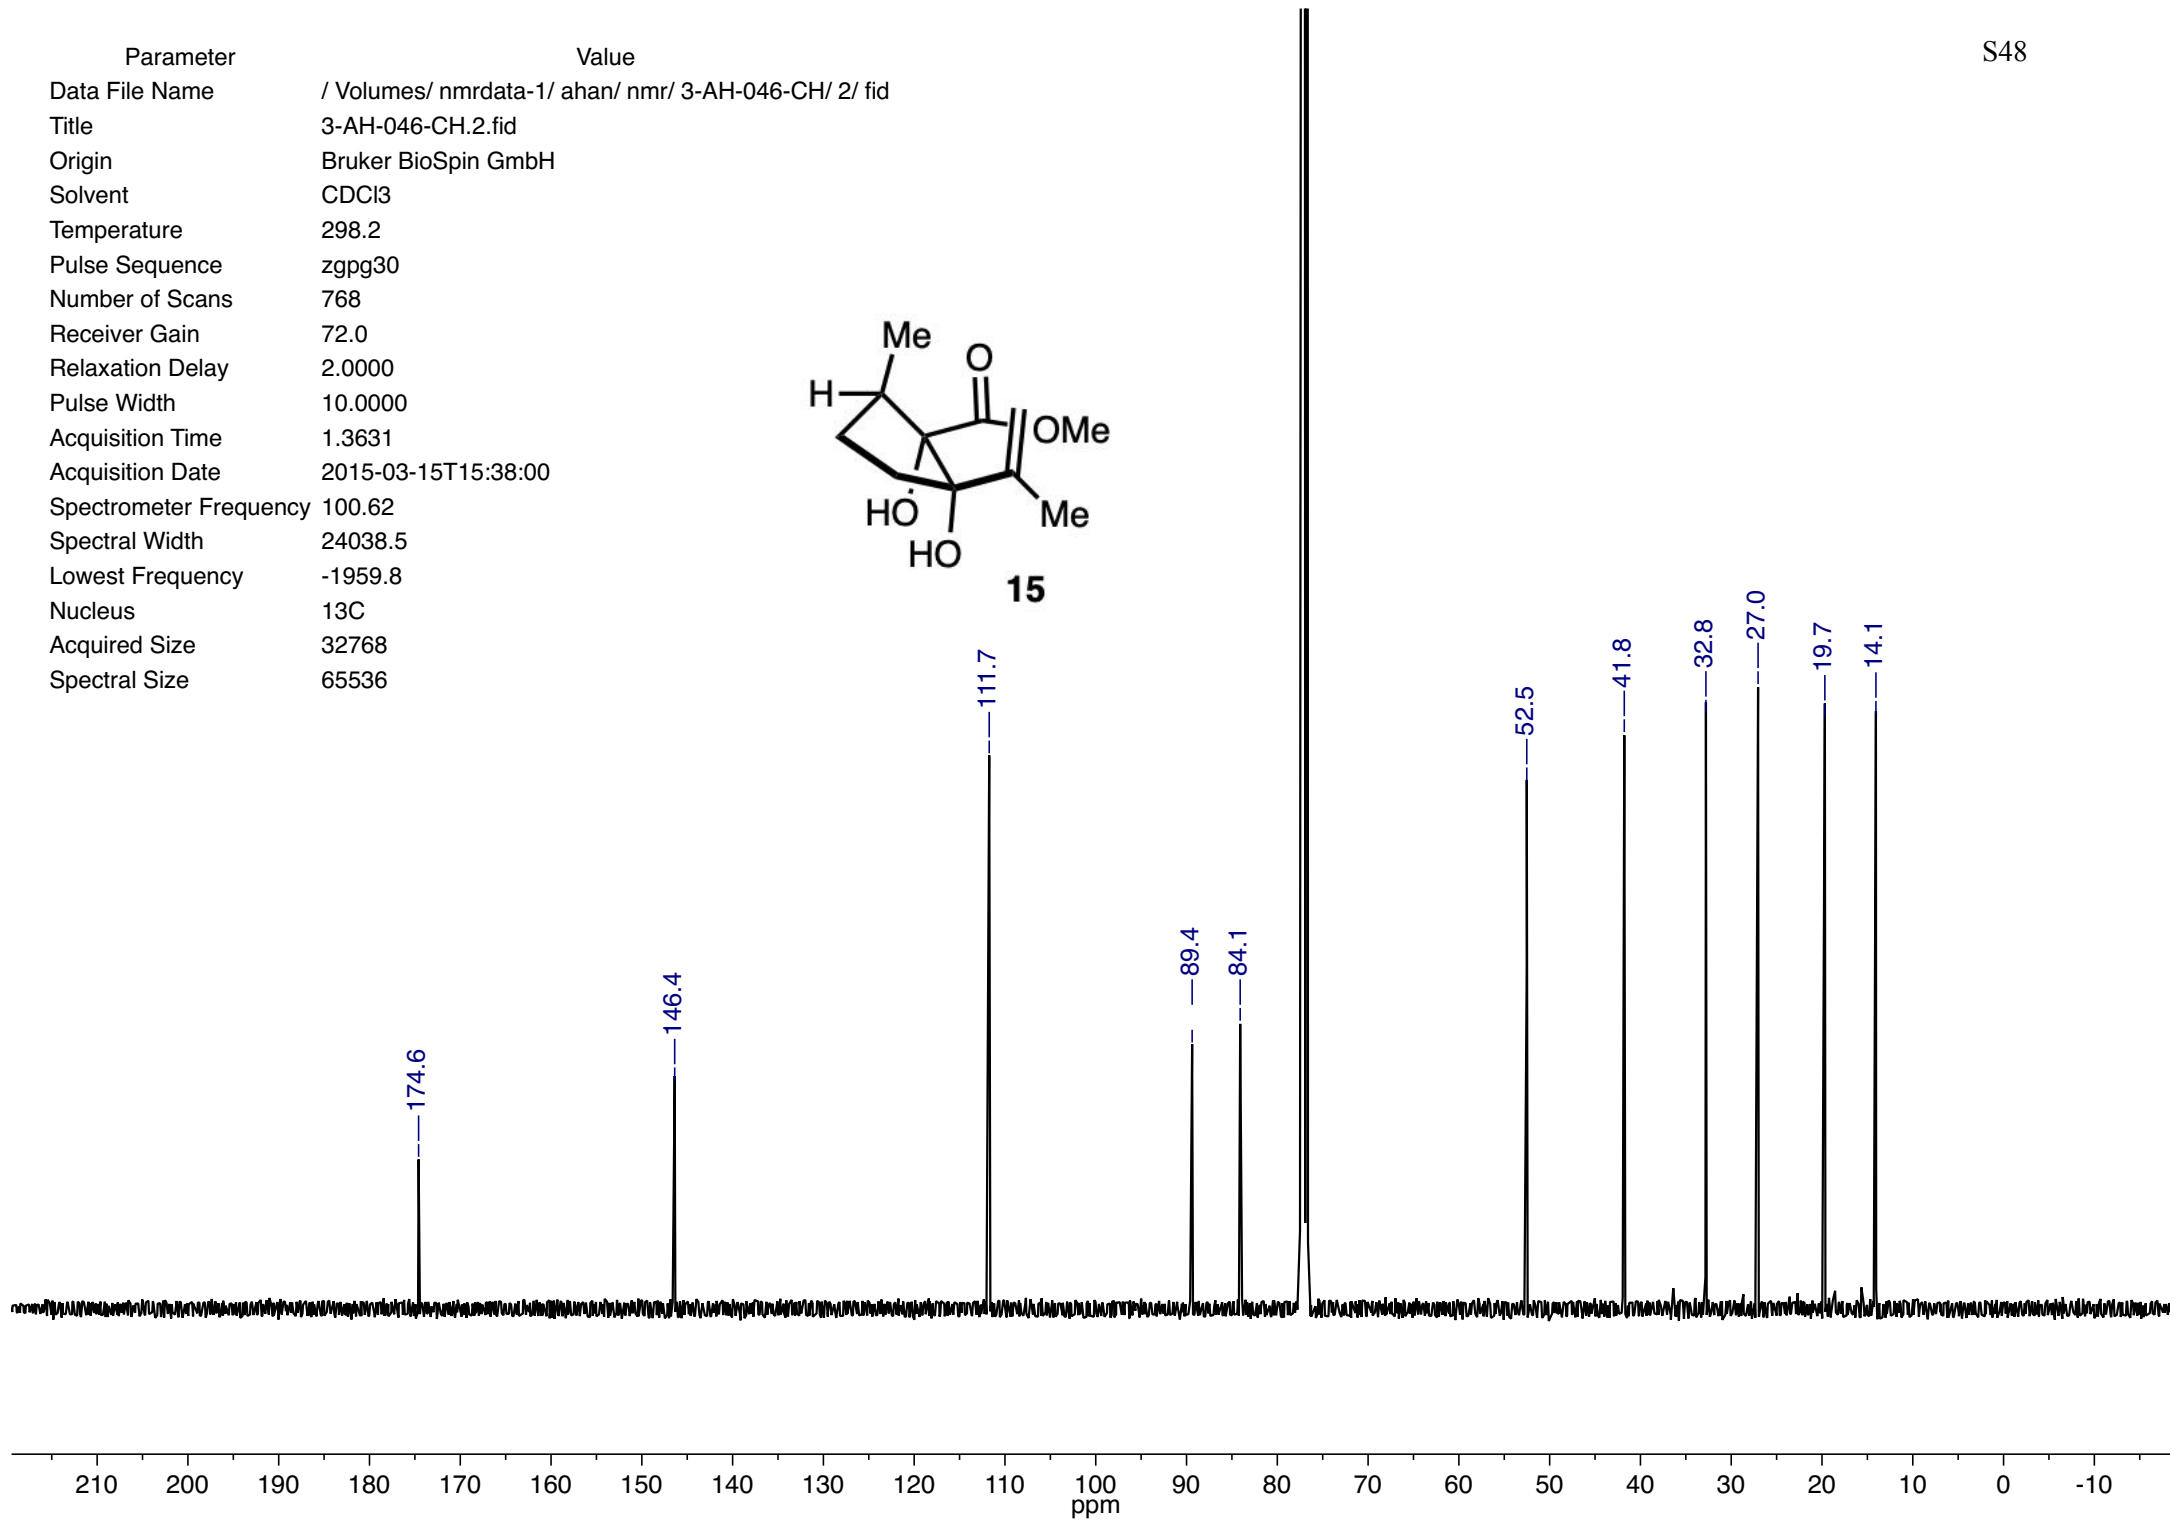

| Parameter              | Value                                                                   |
|------------------------|-------------------------------------------------------------------------|
| Data File Name         | / Volumes/ nmrdata/ ahan/ vnmrsys/ data/ 3-AH-012-CH/ PROTON01.fid/ fid |
| Title                  | PROTON01                                                                |
| Origin                 | Varian                                                                  |
| Solvent                | CDCl3                                                                   |
| Temperature            | 25.0                                                                    |
| Pulse Sequence         | s2pul                                                                   |
| Number of Scans        | 8                                                                       |
| Receiver Gain          | 38                                                                      |
| Relaxation Delay       | 1.0000                                                                  |
| Pulse Width            | 4.2500                                                                  |
| Acquisition Time       | 2.5559                                                                  |
| Acquisition Date       | 2015-03-18T12:25:58                                                     |
| Spectrometer Frequency | 399.80                                                                  |
| Spectral Width         | 6410.3                                                                  |
| Lowest Frequency       | -805.6                                                                  |
| Nucleus                | 1H                                                                      |
| Acquired Size          | 16384                                                                   |
| Spectral Size          | 65536                                                                   |

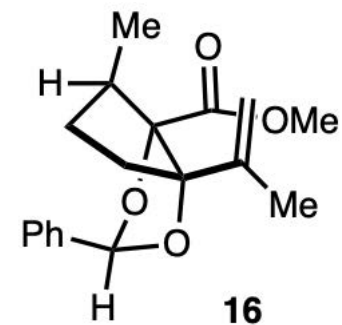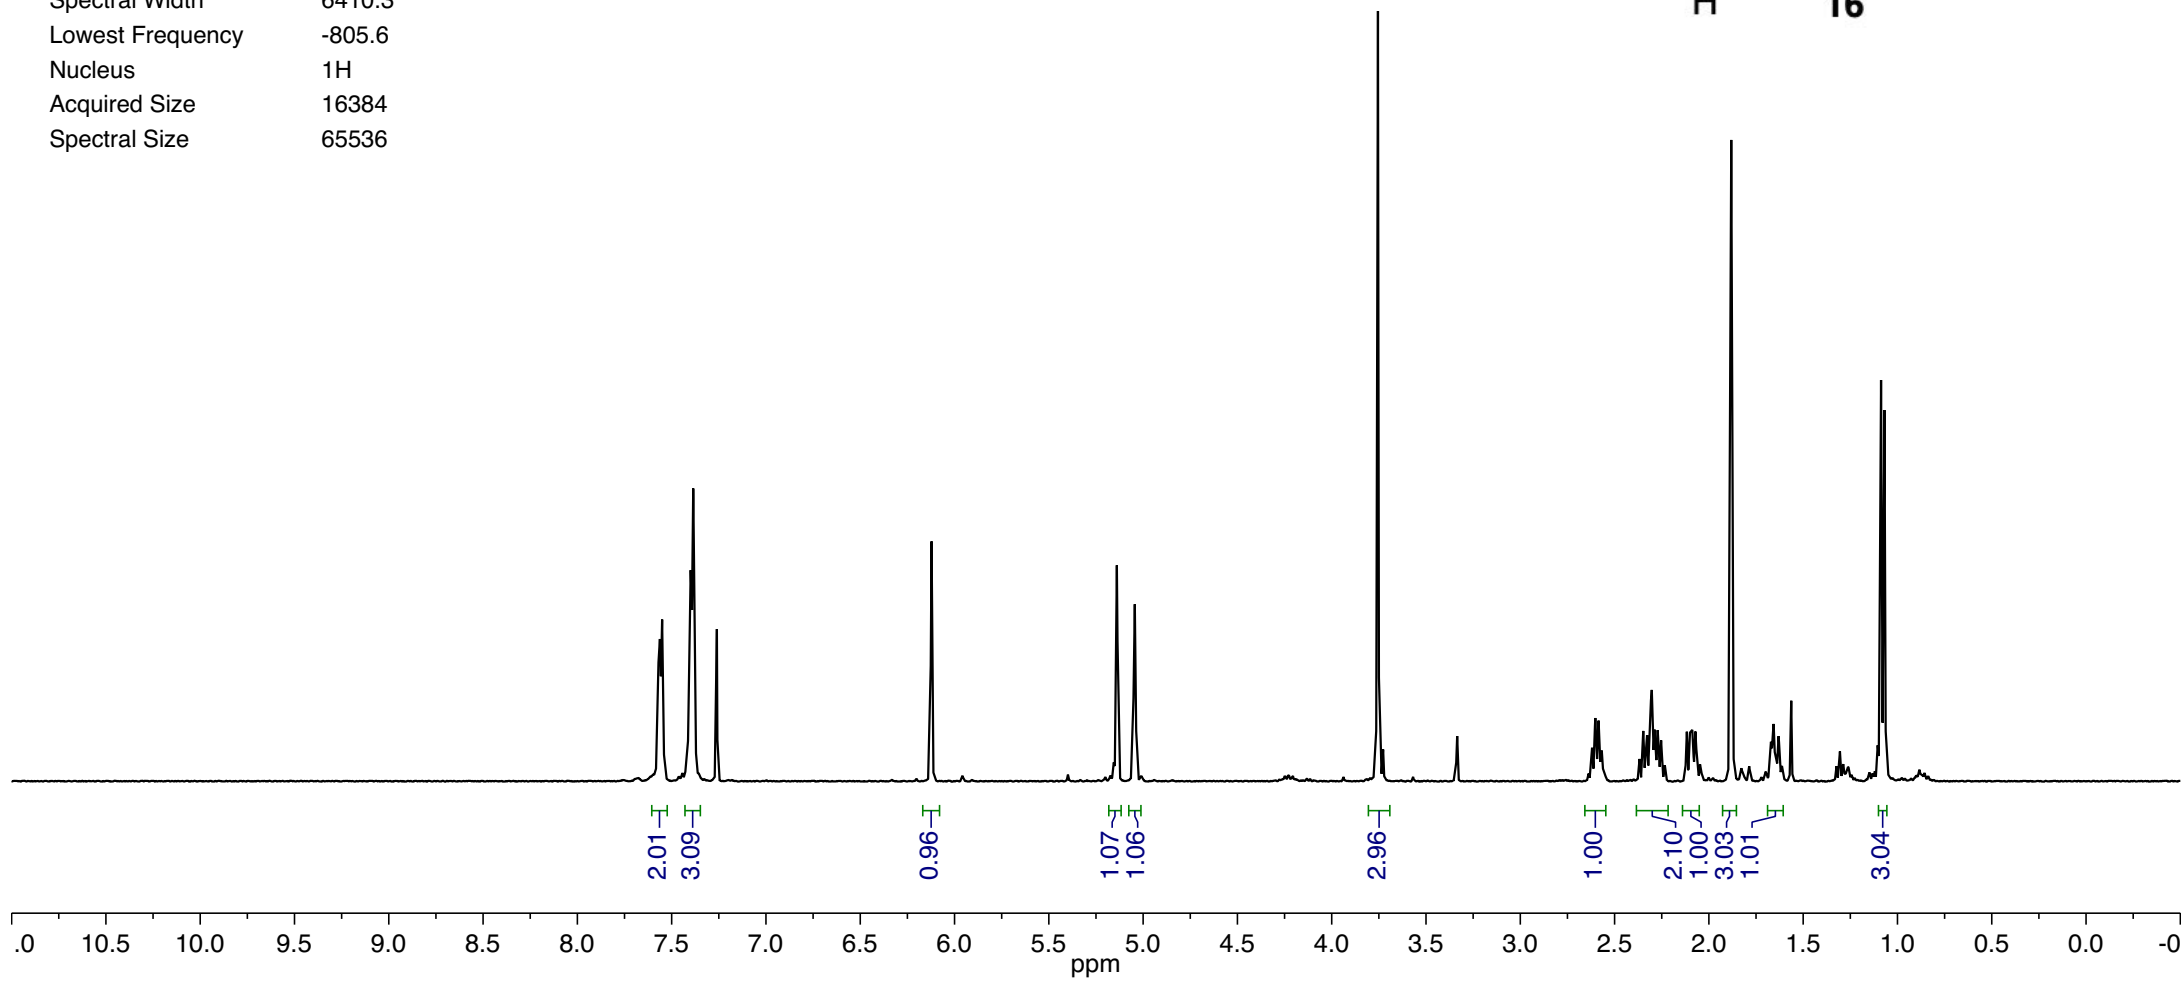

| Parameter              | Value                                                                  |
|------------------------|------------------------------------------------------------------------|
| Data File Name         | / Volumes/ nmrdata/ ahan/ vnmsys/ data/ 3-AH-012-CH/ CARBON01.fid/ fid |
| Title                  | CARBON01                                                               |
| Origin                 | Varian                                                                 |
| Solvent                | CDCl3                                                                  |
| Temperature            | 25.0                                                                   |
| Pulse Sequence         | s2pul                                                                  |
| Number of Scans        | 1000                                                                   |
| Receiver Gain          | 30                                                                     |
| Relaxation Delay       | 1.0000                                                                 |
| Pulse Width            | 3.4500                                                                 |
| Acquisition Time       | 1.3107                                                                 |
| Acquisition Date       | 2015-03-18T12:26:46                                                    |
| Spectrometer Frequency | 100.54                                                                 |
| Spectral Width         | 25000.0                                                                |
| Lowest Frequency       | -1442.7                                                                |
| Nucleus                | <sup>13</sup> C                                                        |
| Acquired Size          | 32768                                                                  |
| Spectral Size          | 65536                                                                  |

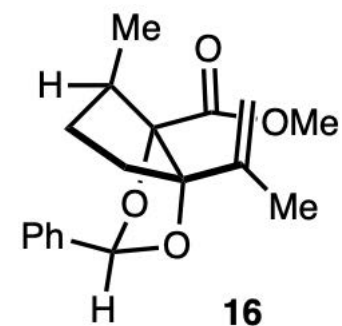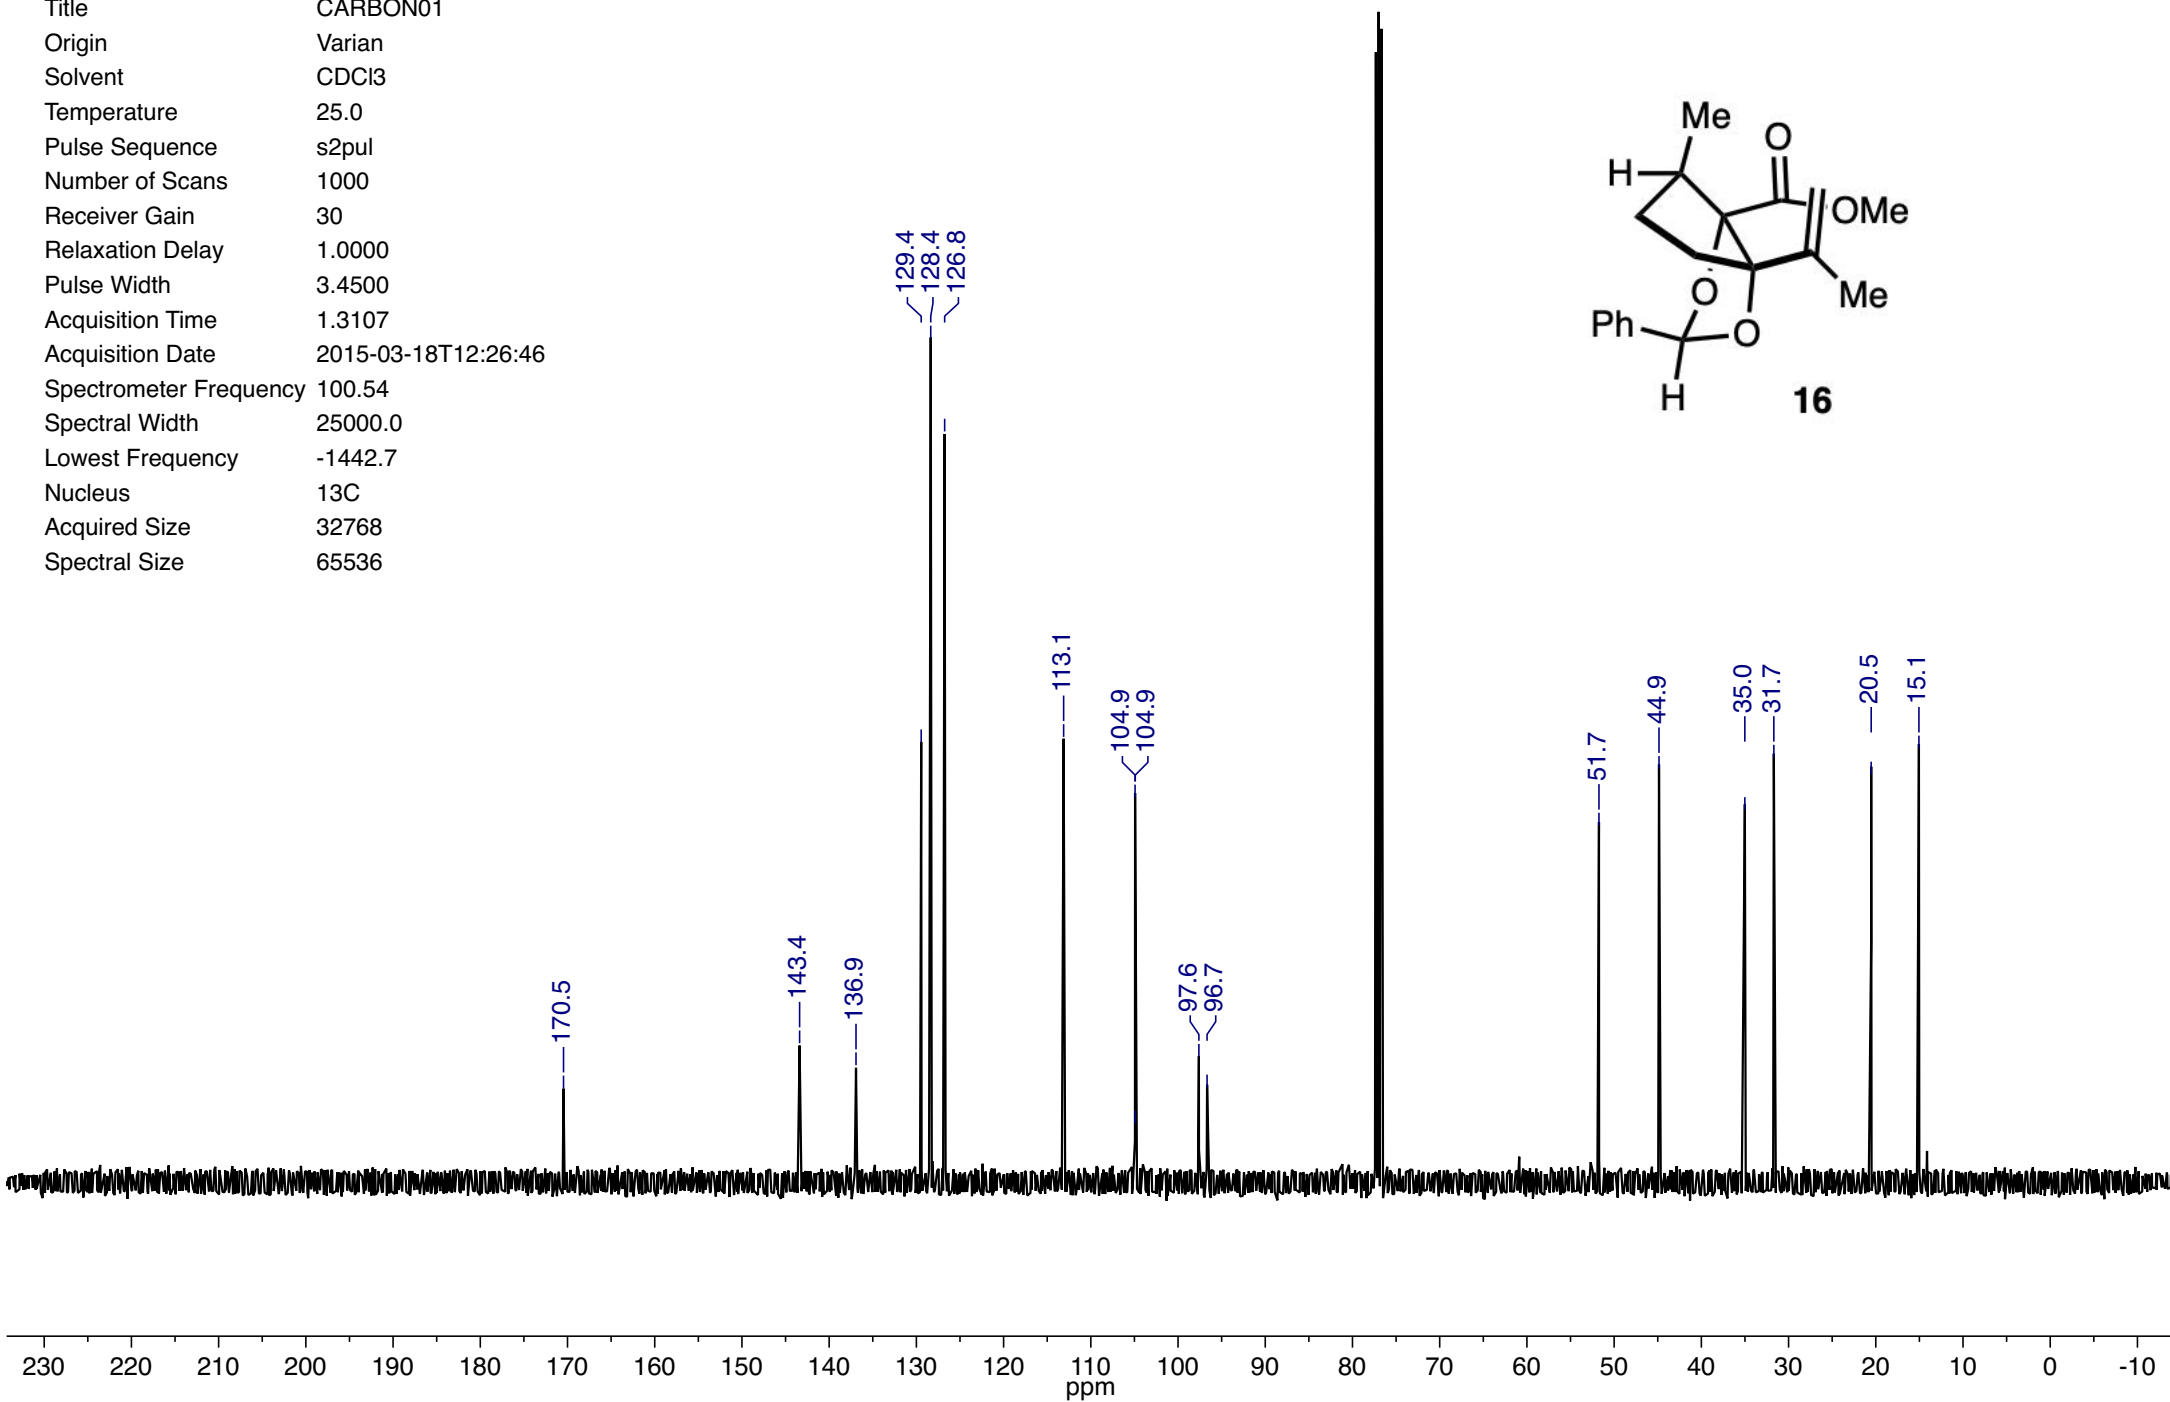

| Parameter              | Value                                                                   |
|------------------------|-------------------------------------------------------------------------|
| Data File Name         | / Volumes/ nmrdata/ ahan/ vnmrsys/ data/ 3-AH-026-CH/ PROTON01.fid/ fid |
| Title                  | PROTON01                                                                |
| Origin                 | Varian                                                                  |
| Solvent                | CDCl3                                                                   |
| Temperature            | 25.0                                                                    |
| Pulse Sequence         | s2pul                                                                   |
| Number of Scans        | 8                                                                       |
| Receiver Gain          | 30                                                                      |
| Relaxation Delay       | 1.0000                                                                  |
| Pulse Width            | 4.2500                                                                  |
| Acquisition Time       | 2.5559                                                                  |
| Acquisition Date       | 2015-03-19T09:25:33                                                     |
| Spectrometer Frequency | 399.80                                                                  |
| Spectral Width         | 6410.3                                                                  |
| Lowest Frequency       | -806.4                                                                  |
| Nucleus                | 1H                                                                      |
| Acquired Size          | 16384                                                                   |
| Spectral Size          | 65536                                                                   |

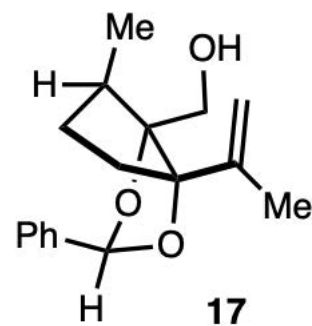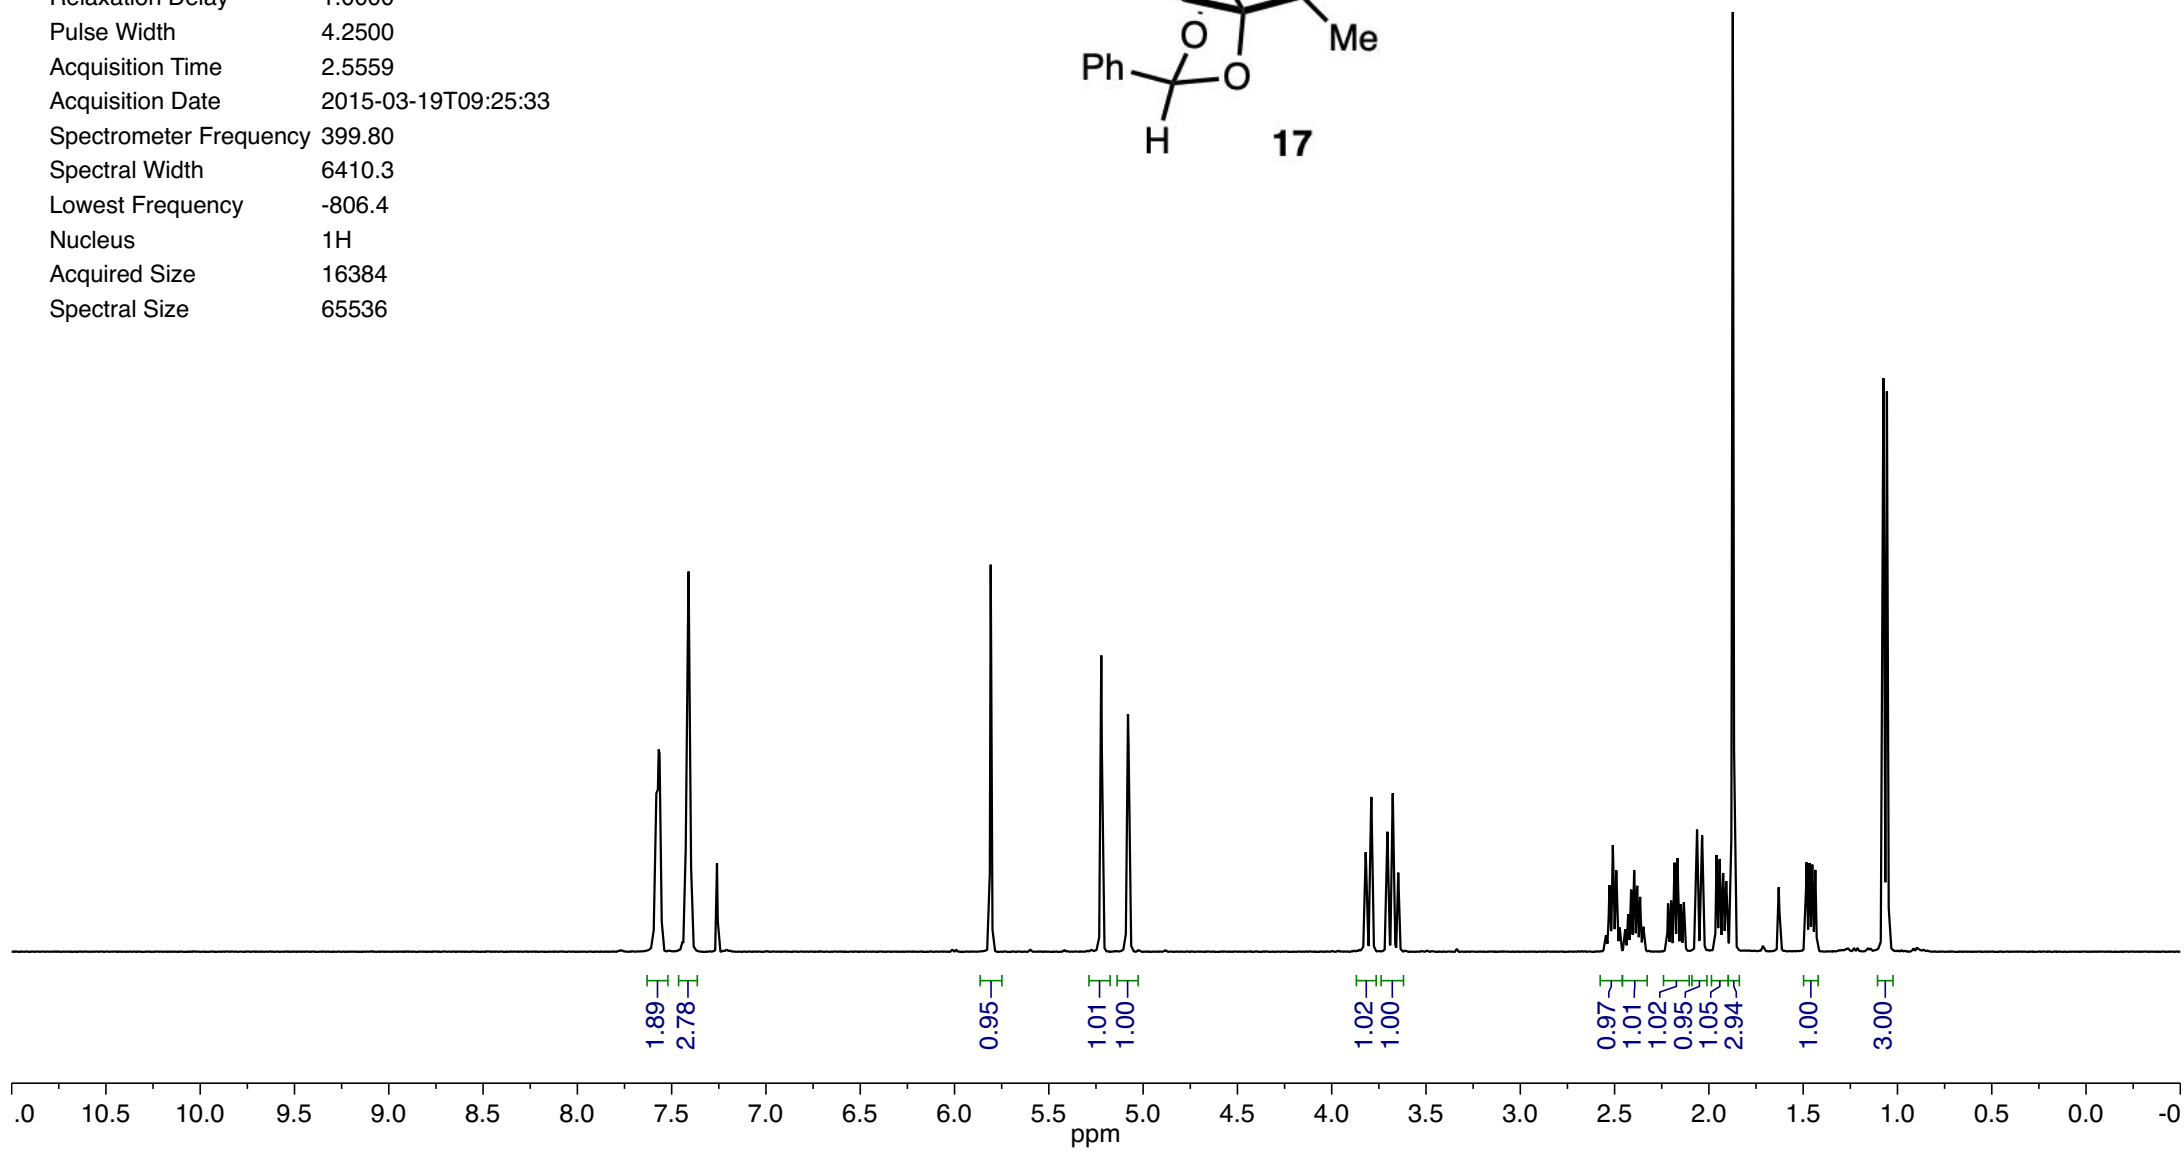

| Parameter              | Value                                                                   |
|------------------------|-------------------------------------------------------------------------|
| Data File Name         | / Volumes/ nmrdata/ ahan/ vnmrsys/ data/ 3-AH-026-CH/ CARBON01.fid/ fid |
| Title                  | CARBON01                                                                |
| Origin                 | Varian                                                                  |
| Solvent                | CDCl3                                                                   |
| Temperature            | 25.0                                                                    |
| Pulse Sequence         | s2pul                                                                   |
| Number of Scans        | 1000                                                                    |
| Receiver Gain          | 30                                                                      |
| Relaxation Delay       | 1.0000                                                                  |
| Pulse Width            | 3.4500                                                                  |
| Acquisition Time       | 1.3107                                                                  |
| Acquisition Date       | 2015-03-19T09:26:14                                                     |
| Spectrometer Frequency | 100.54                                                                  |
| Spectral Width         | 25000.0                                                                 |
| Lowest Frequency       | -1444.2                                                                 |
| Nucleus                | <sup>13</sup> C                                                         |
| Acquired Size          | 32768                                                                   |
| Spectral Size          | 65536                                                                   |

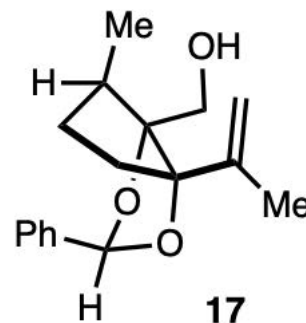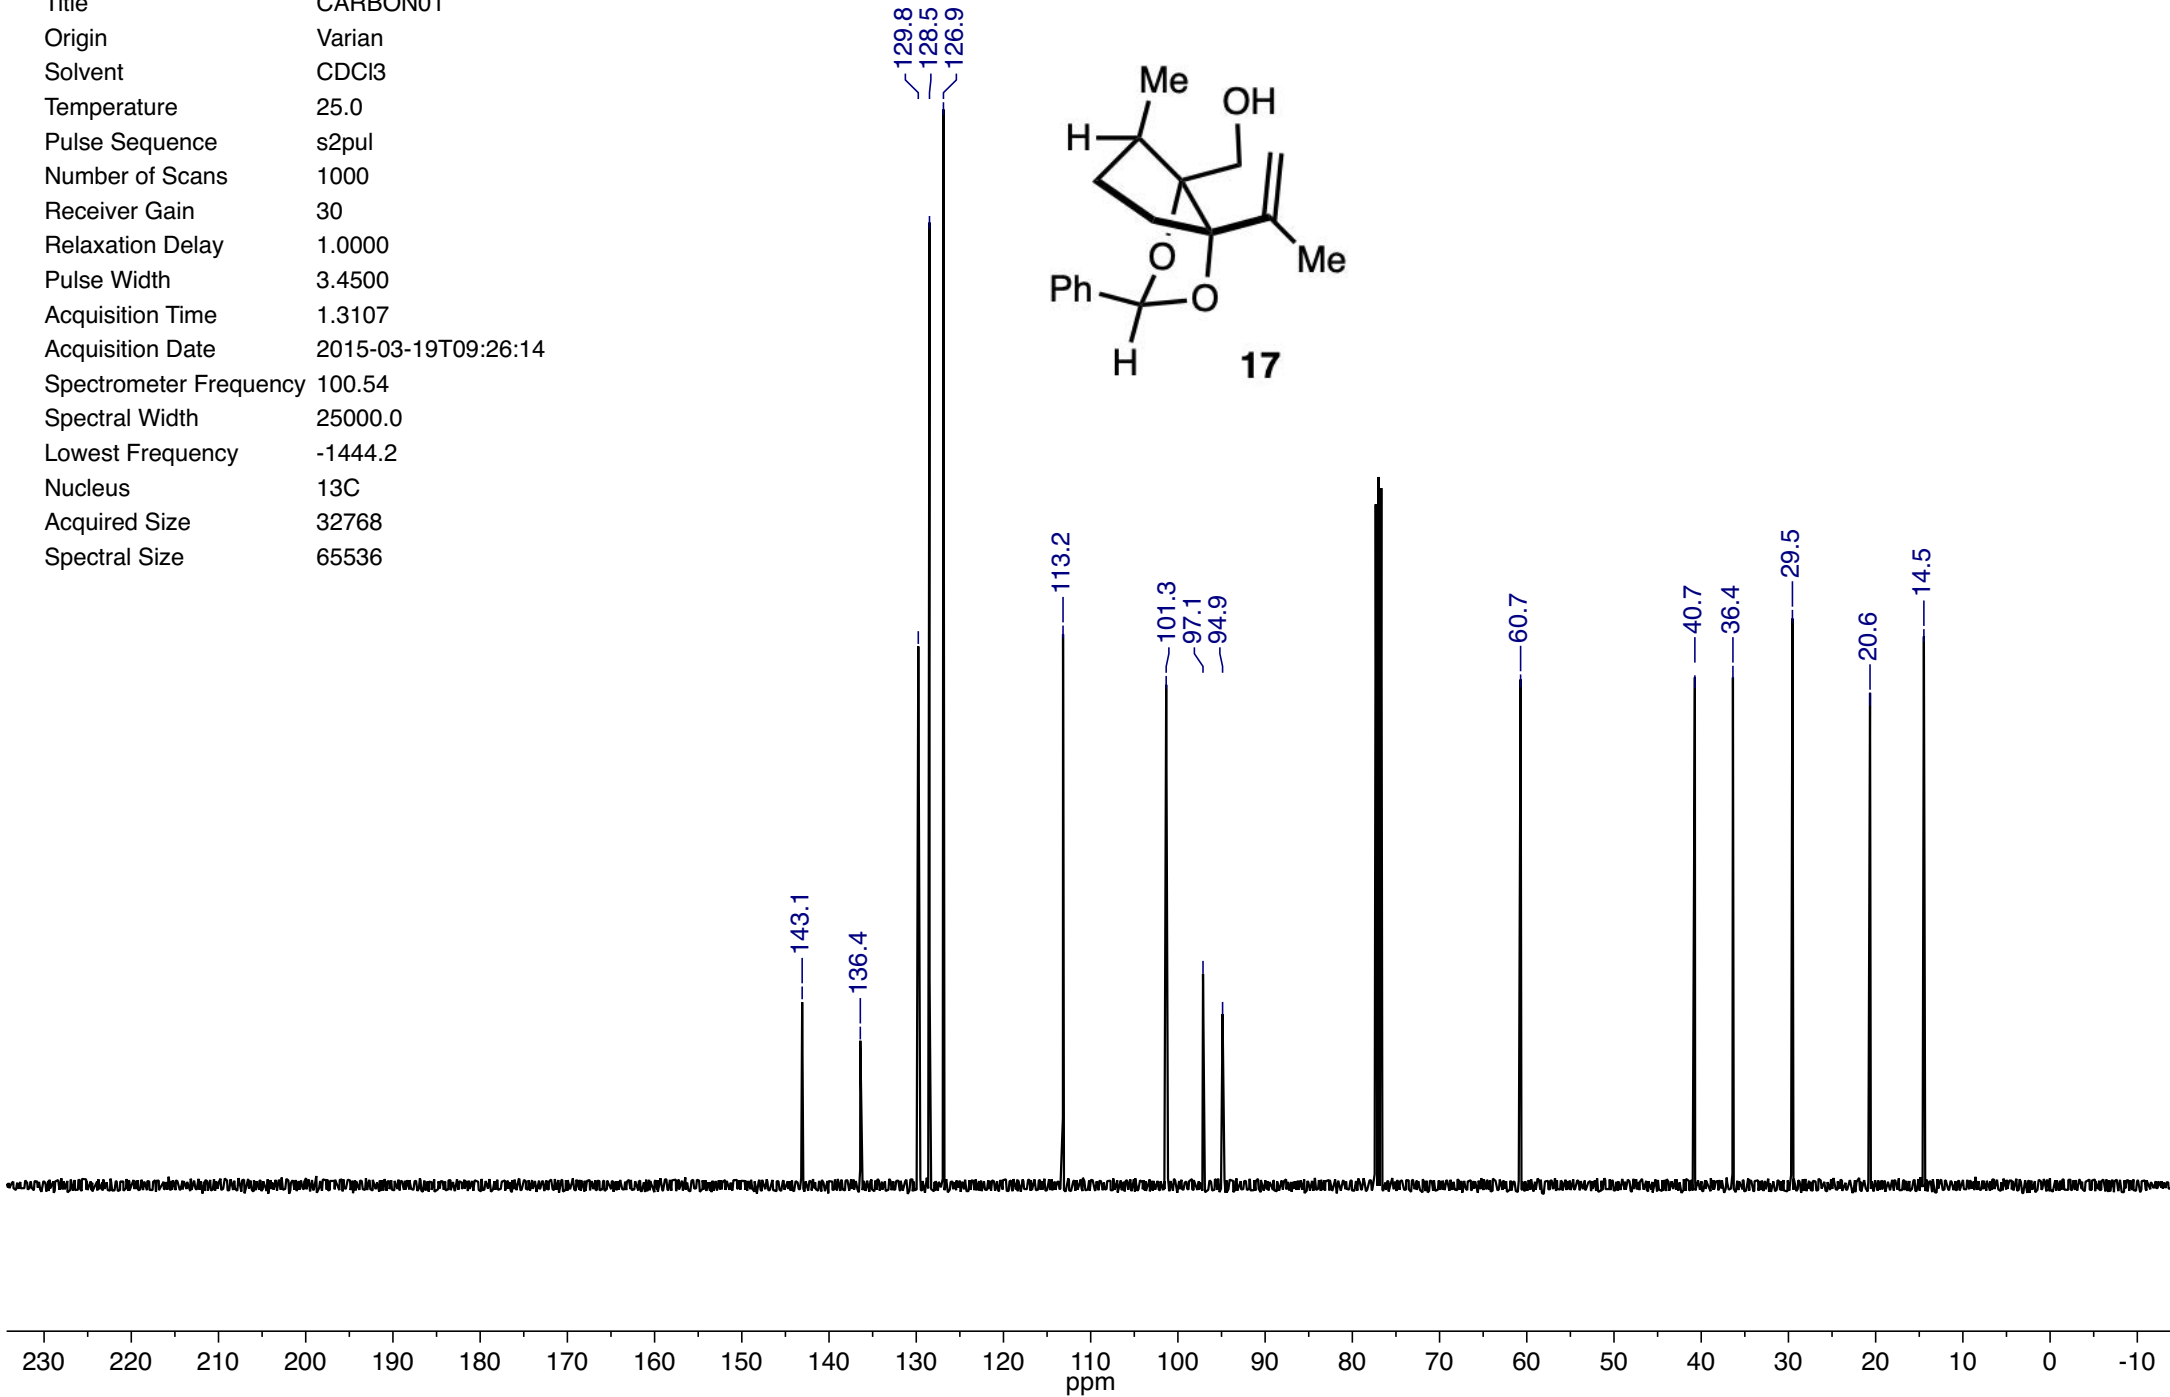



| Parameter              | Value                                       |
|------------------------|---------------------------------------------|
| Data File Name         | /Volumes/nmrdata/ahan/nmr/9-AH-041-CH/1/fid |
| Title                  | 9-AH-041-CH.1.fid                           |
| Origin                 | Bruker BioSpin GmbH                         |
| Solvent                | CDCl3                                       |
| Temperature            | 295.2                                       |
| Pulse Sequence         | zg30                                        |
| Number of Scans        | 4                                           |
| Receiver Gain          | 197.4                                       |
| Relaxation Delay       | 5.0000                                      |
| Pulse Width            | 11.7000                                     |
| Acquisition Time       | 4.0894                                      |
| Acquisition Date       | 2018-07-16T09:10:17                         |
| Spectrometer Frequency | 400.13                                      |
| Spectral Width         | 8012.8                                      |
| Lowest Frequency       | -1545.2                                     |
| Nucleus                | 1H                                          |
| Acquired Size          | 32768                                       |
| Spectral Size          | 65536                                       |

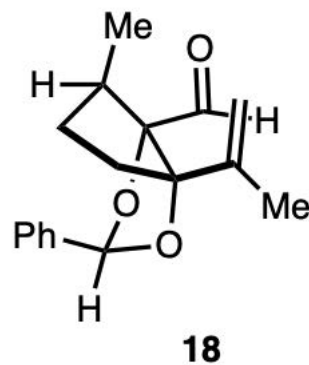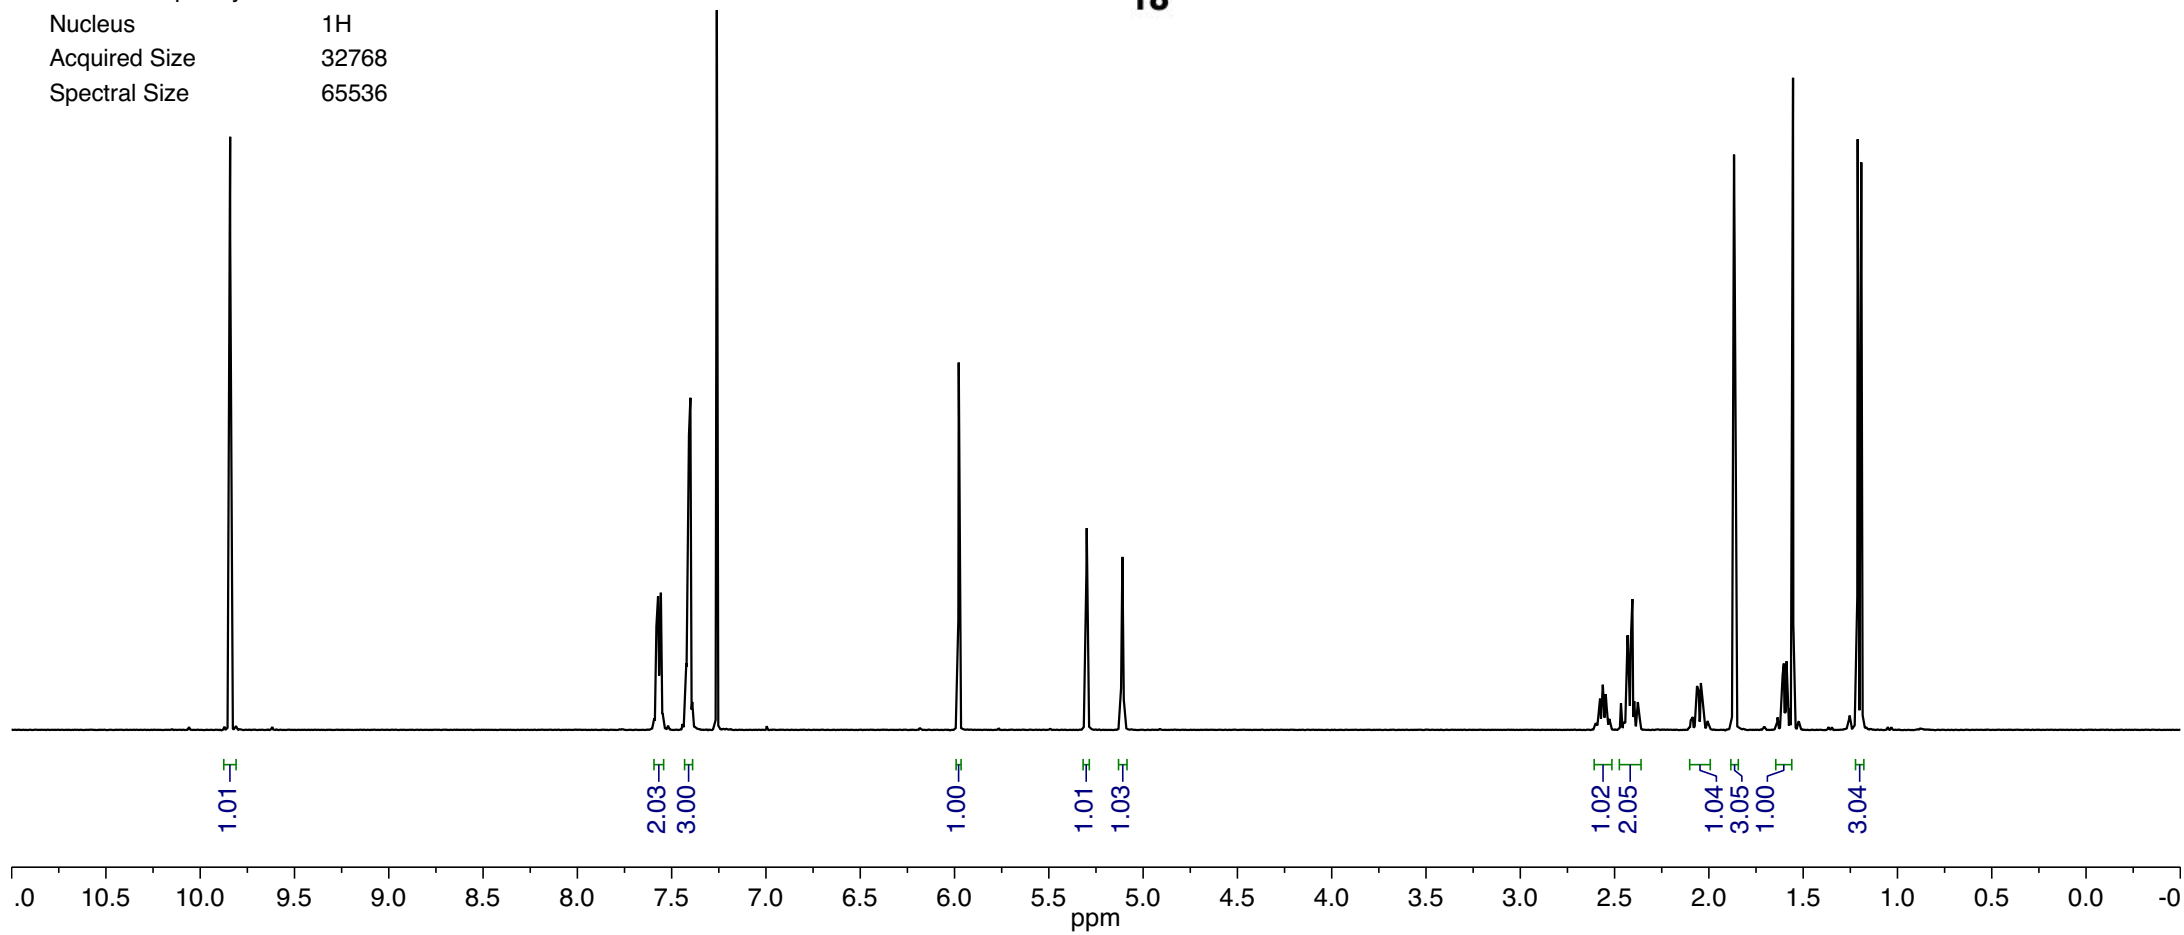

| Parameter              | Value                                         |
|------------------------|-----------------------------------------------|
| Data File Name         | /Volumes/nmrdata/ahan/nmr/9-AH-041-CH/ 2/ fid |
| Title                  | 9-AH-041-CH.2.fid                             |
| Origin                 | Bruker BioSpin GmbH                           |
| Solvent                | CDCl3                                         |
| Temperature            | 295.2                                         |
| Pulse Sequence         | zgpg30                                        |
| Number of Scans        | 750                                           |
| Receiver Gain          | 55.5                                          |
| Relaxation Delay       | 1.0000                                        |
| Pulse Width            | 10.0000                                       |
| Acquisition Time       | 1.3631                                        |
| Acquisition Date       | 2018-07-16T09:41:07                           |
| Spectrometer Frequency | 100.62                                        |
| Spectral Width         | 24038.5                                       |
| Lowest Frequency       | -1961.2                                       |
| Nucleus                | <sup>13</sup> C                               |
| Acquired Size          | 32768                                         |
| Spectral Size          | 65536                                         |

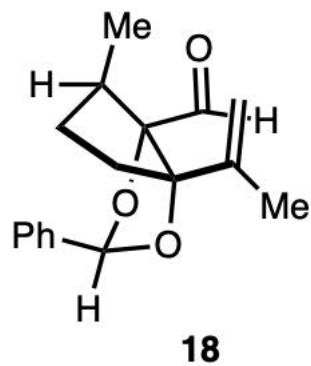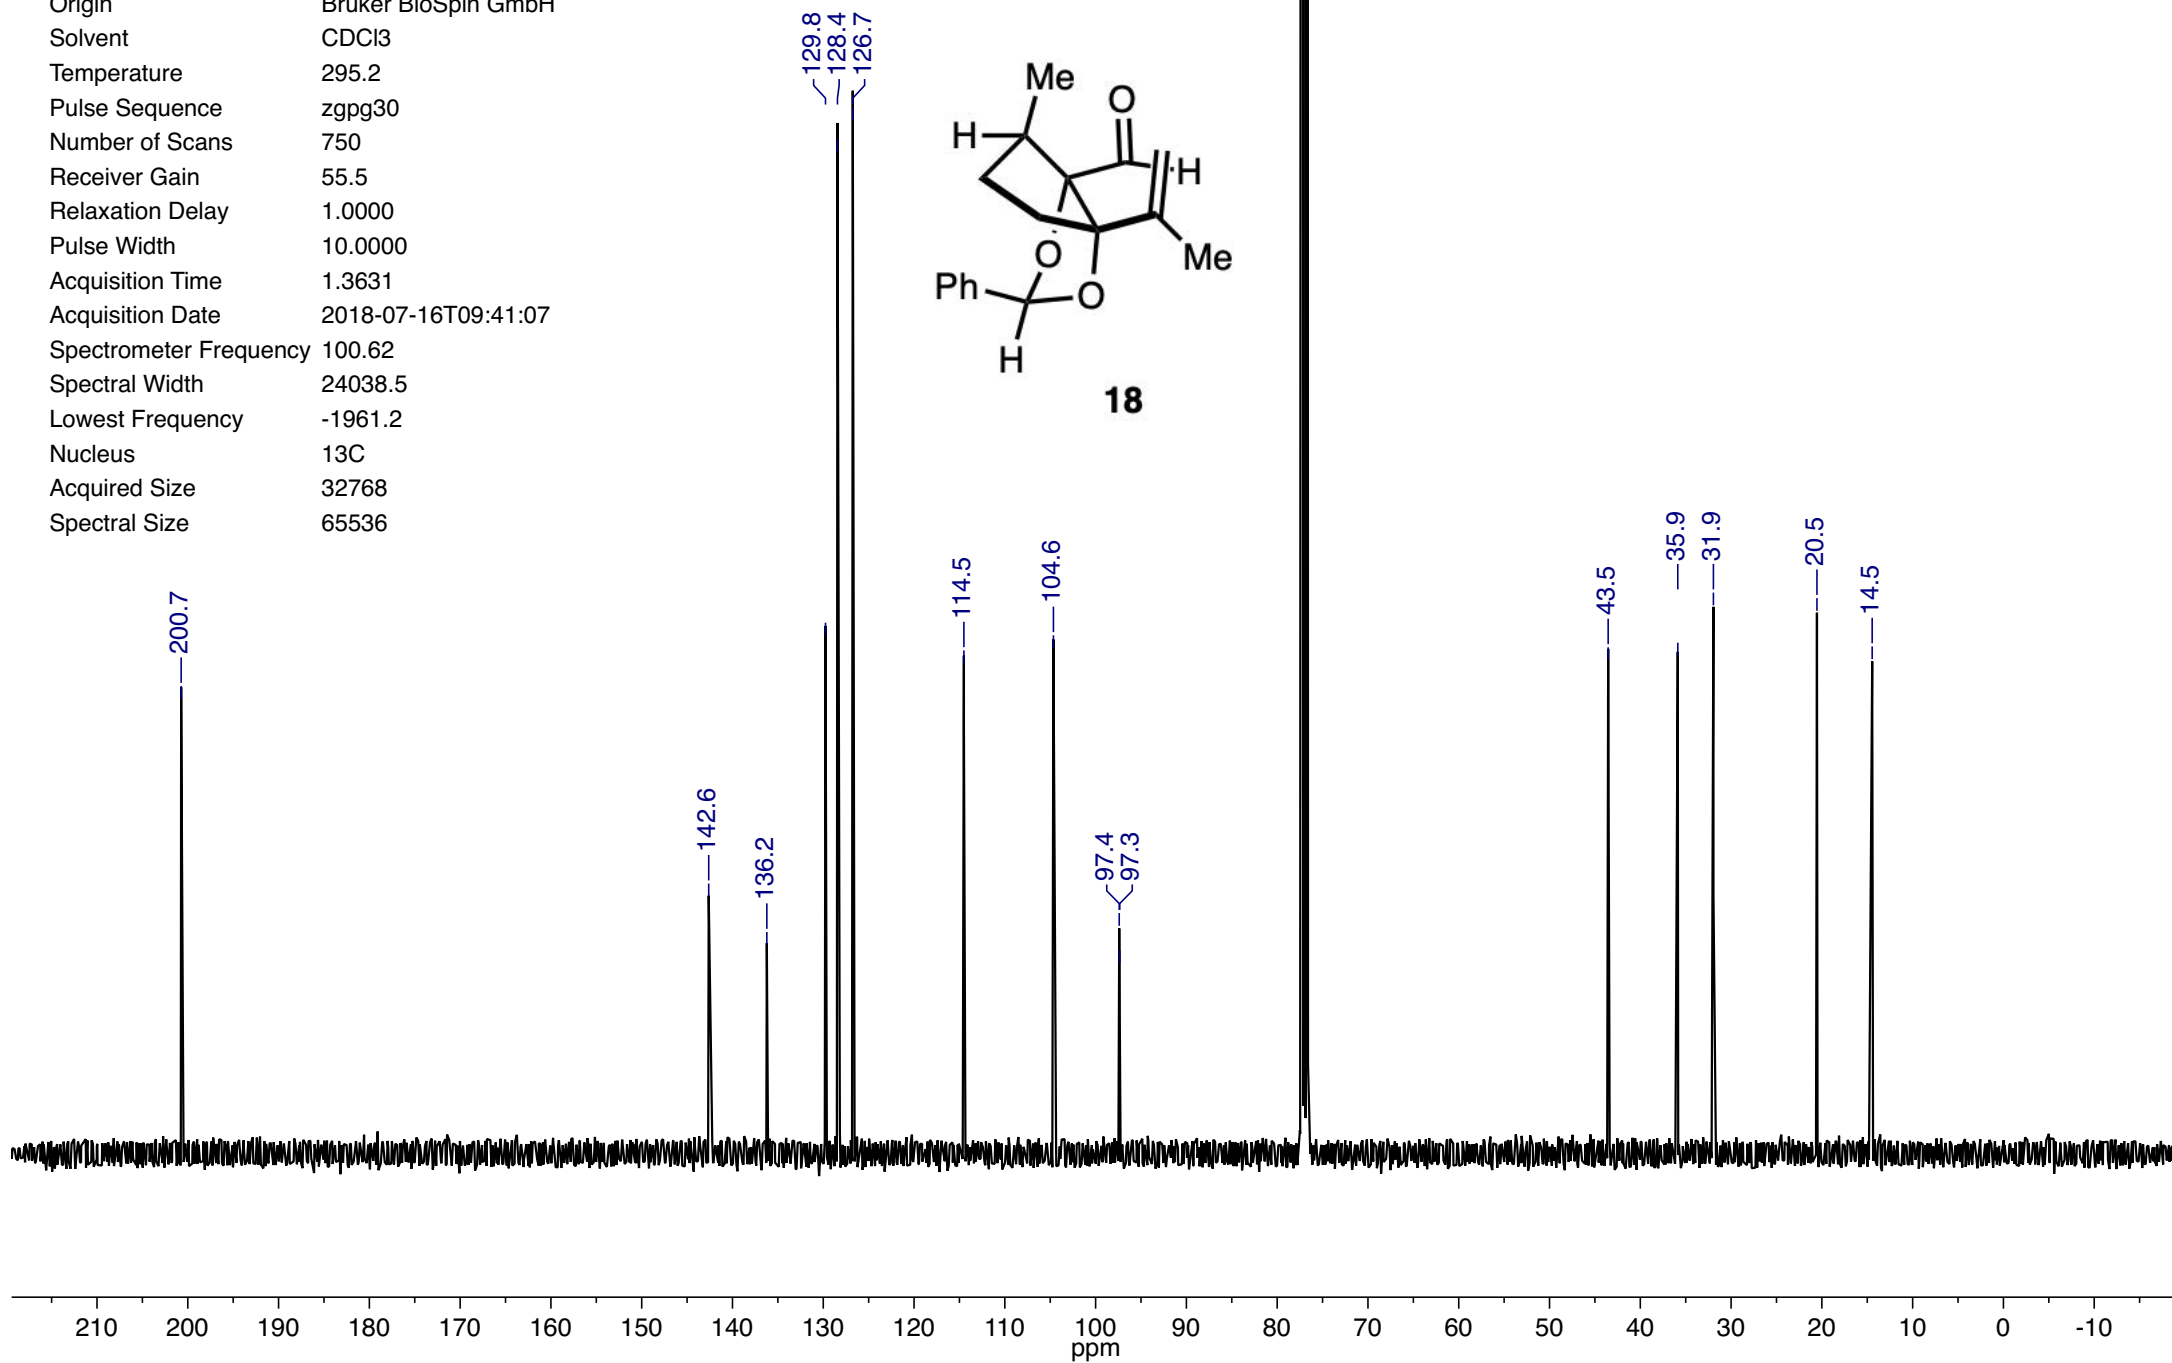

| Parameter              | Value                                       |
|------------------------|---------------------------------------------|
| Data File Name         | /Volumes/nmrdata/ahan/nmr/9-AH-054-CH/1/fid |
| Title                  | 9-AH-054-CH.1.fid                           |
| Origin                 | Bruker BioSpin GmbH                         |
| Solvent                | CDCl3                                       |
| Temperature            | 298.1                                       |
| Pulse Sequence         | zg30                                        |
| Number of Scans        | 2                                           |
| Receiver Gain          | 100.0                                       |
| Relaxation Delay       | 5.0000                                      |
| Pulse Width            | 10.0000                                     |
| Acquisition Time       | 3.9977                                      |
| Acquisition Date       | 2018-08-01T09:05:57                         |
| Spectrometer Frequency | 400.15                                      |
| Spectral Width         | 8196.7                                      |
| Lowest Frequency       | -1639.4                                     |
| Nucleus                | 1H                                          |
| Acquired Size          | 32768                                       |
| Spectral Size          | 65536                                       |

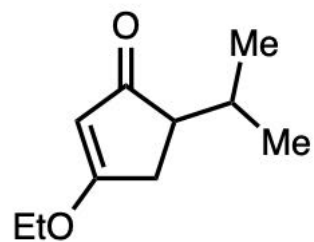**(±)-21**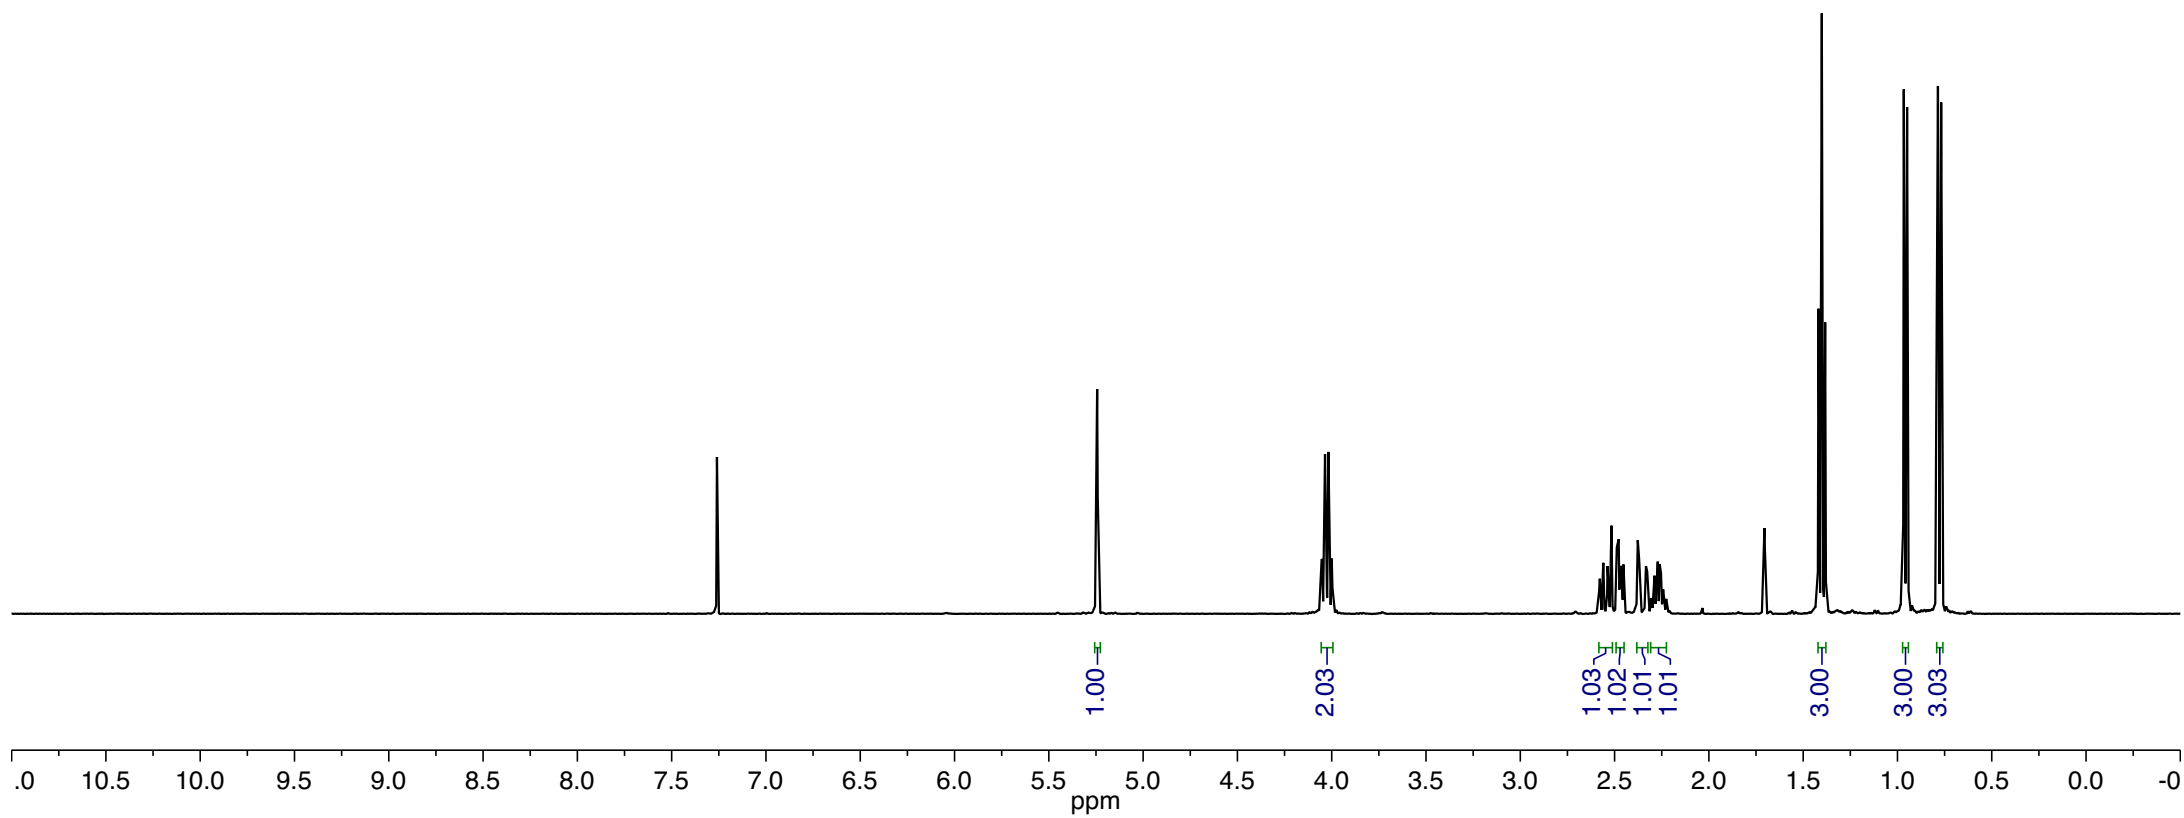

| Parameter              | Value                                       |
|------------------------|---------------------------------------------|
| Data File Name         | /Volumes/nmrdata/ahan/nmr/9-AH-054-CH/2/fid |
| Title                  | 9-AH-054-CH.2.fid                           |
| Origin                 | Bruker BioSpin GmbH                         |
| Solvent                | CDCl <sub>3</sub>                           |
| Temperature            | 298.1                                       |
| Pulse Sequence         | zgpg30                                      |
| Number of Scans        | 1000                                        |
| Receiver Gain          | 15.3                                        |
| Relaxation Delay       | 1.0000                                      |
| Pulse Width            | 10.0000                                     |
| Acquisition Time       | 1.3763                                      |
| Acquisition Date       | 2018-08-01T09:49:08                         |
| Spectrometer Frequency | 100.63                                      |
| Spectral Width         | 23809.5                                     |
| Lowest Frequency       | -1846.1                                     |
| Nucleus                | <sup>13</sup> C                             |
| Acquired Size          | 32768                                       |
| Spectral Size          | 65536                                       |

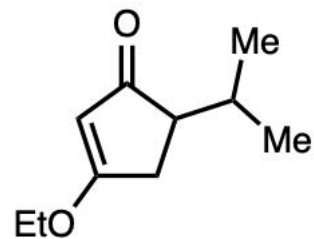

**(±)-21**

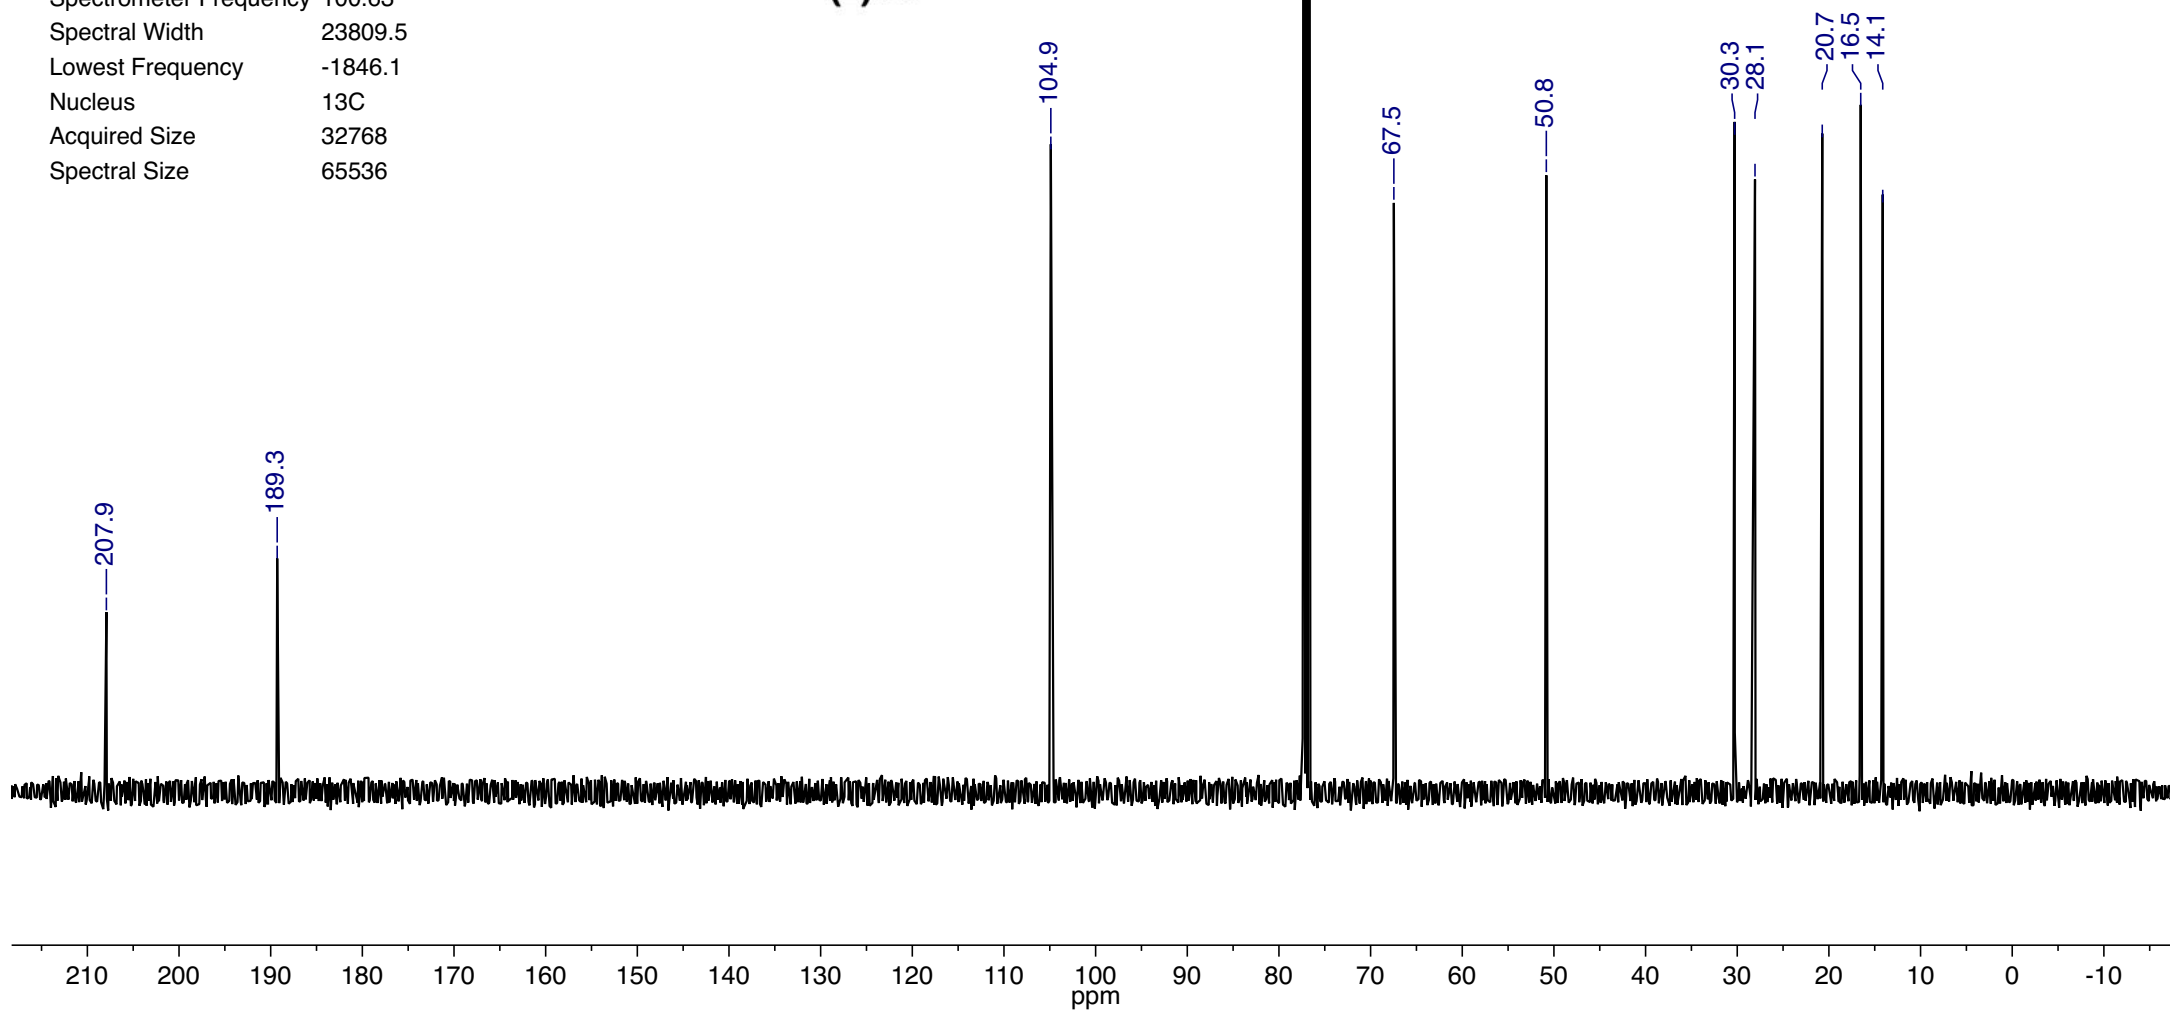

| Parameter              | Value                                              |
|------------------------|----------------------------------------------------|
| Data File Name         | / Volumes/ nmrdata/ ahan/ nmr/ 9-AH-054-CH/ 1/ fid |
| Title                  | 9-AH-054-CH.1.fid                                  |
| Origin                 | Bruker BioSpin GmbH                                |
| Solvent                | CDCl3                                              |
| Temperature            | 295.1                                              |
| Pulse Sequence         | zg30                                               |
| Number of Scans        | 1                                                  |
| Receiver Gain          | 30.3                                               |
| Relaxation Delay       | 5.0000                                             |
| Pulse Width            | 11.7000                                            |
| Acquisition Time       | 4.0894                                             |
| Acquisition Date       | 2018-08-04T13:35:43                                |
| Spectrometer Frequency | 400.13                                             |
| Spectral Width         | 8012.8                                             |
| Lowest Frequency       | -1545.4                                            |
| Nucleus                | 1H                                                 |
| Acquired Size          | 32768                                              |
| Spectral Size          | 65536                                              |

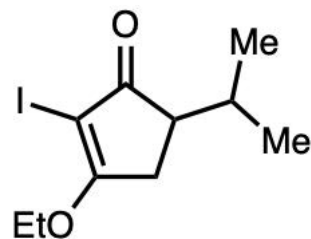**(±)-22**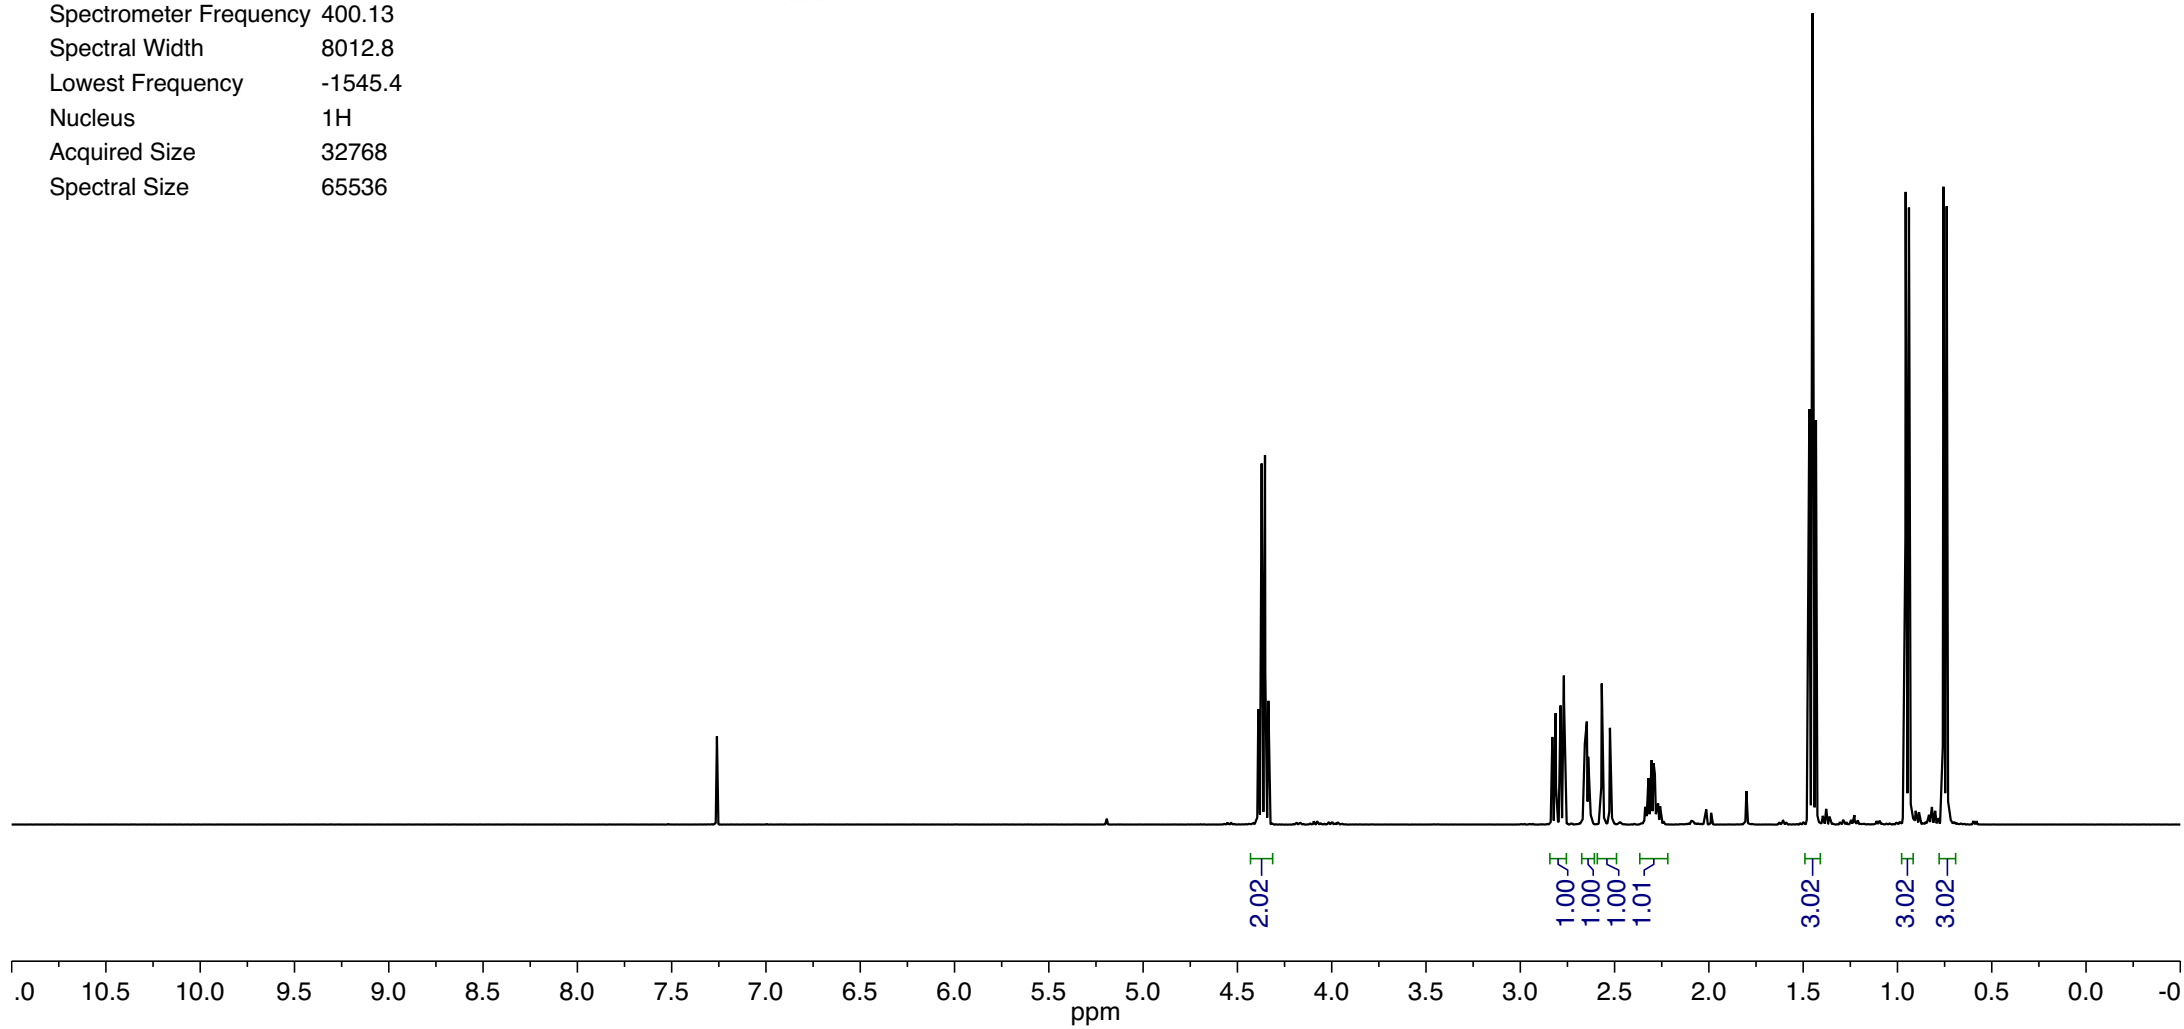

| Parameter              | Value                                         |
|------------------------|-----------------------------------------------|
| Data File Name         | /Volumes/nmrdata/ahan/nmr/9-AH-054-CH/ 2/ fid |
| Title                  | 9-AH-054-CH.2.fid                             |
| Origin                 | Bruker BioSpin GmbH                           |
| Solvent                | CDCl3                                         |
| Temperature            | 295.2                                         |
| Pulse Sequence         | zgpg30                                        |
| Number of Scans        | 26                                            |
| Receiver Gain          | 64.2                                          |
| Relaxation Delay       | 1.0000                                        |
| Pulse Width            | 10.0000                                       |
| Acquisition Time       | 1.3631                                        |
| Acquisition Date       | 2018-08-04T13:37:49                           |
| Spectrometer Frequency | 100.62                                        |
| Spectral Width         | 24038.5                                       |
| Lowest Frequency       | -1968.7                                       |
| Nucleus                | <sup>13</sup> C                               |
| Acquired Size          | 32768                                         |
| Spectral Size          | 65536                                         |

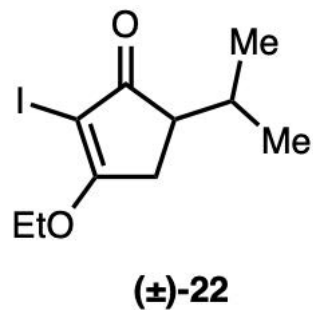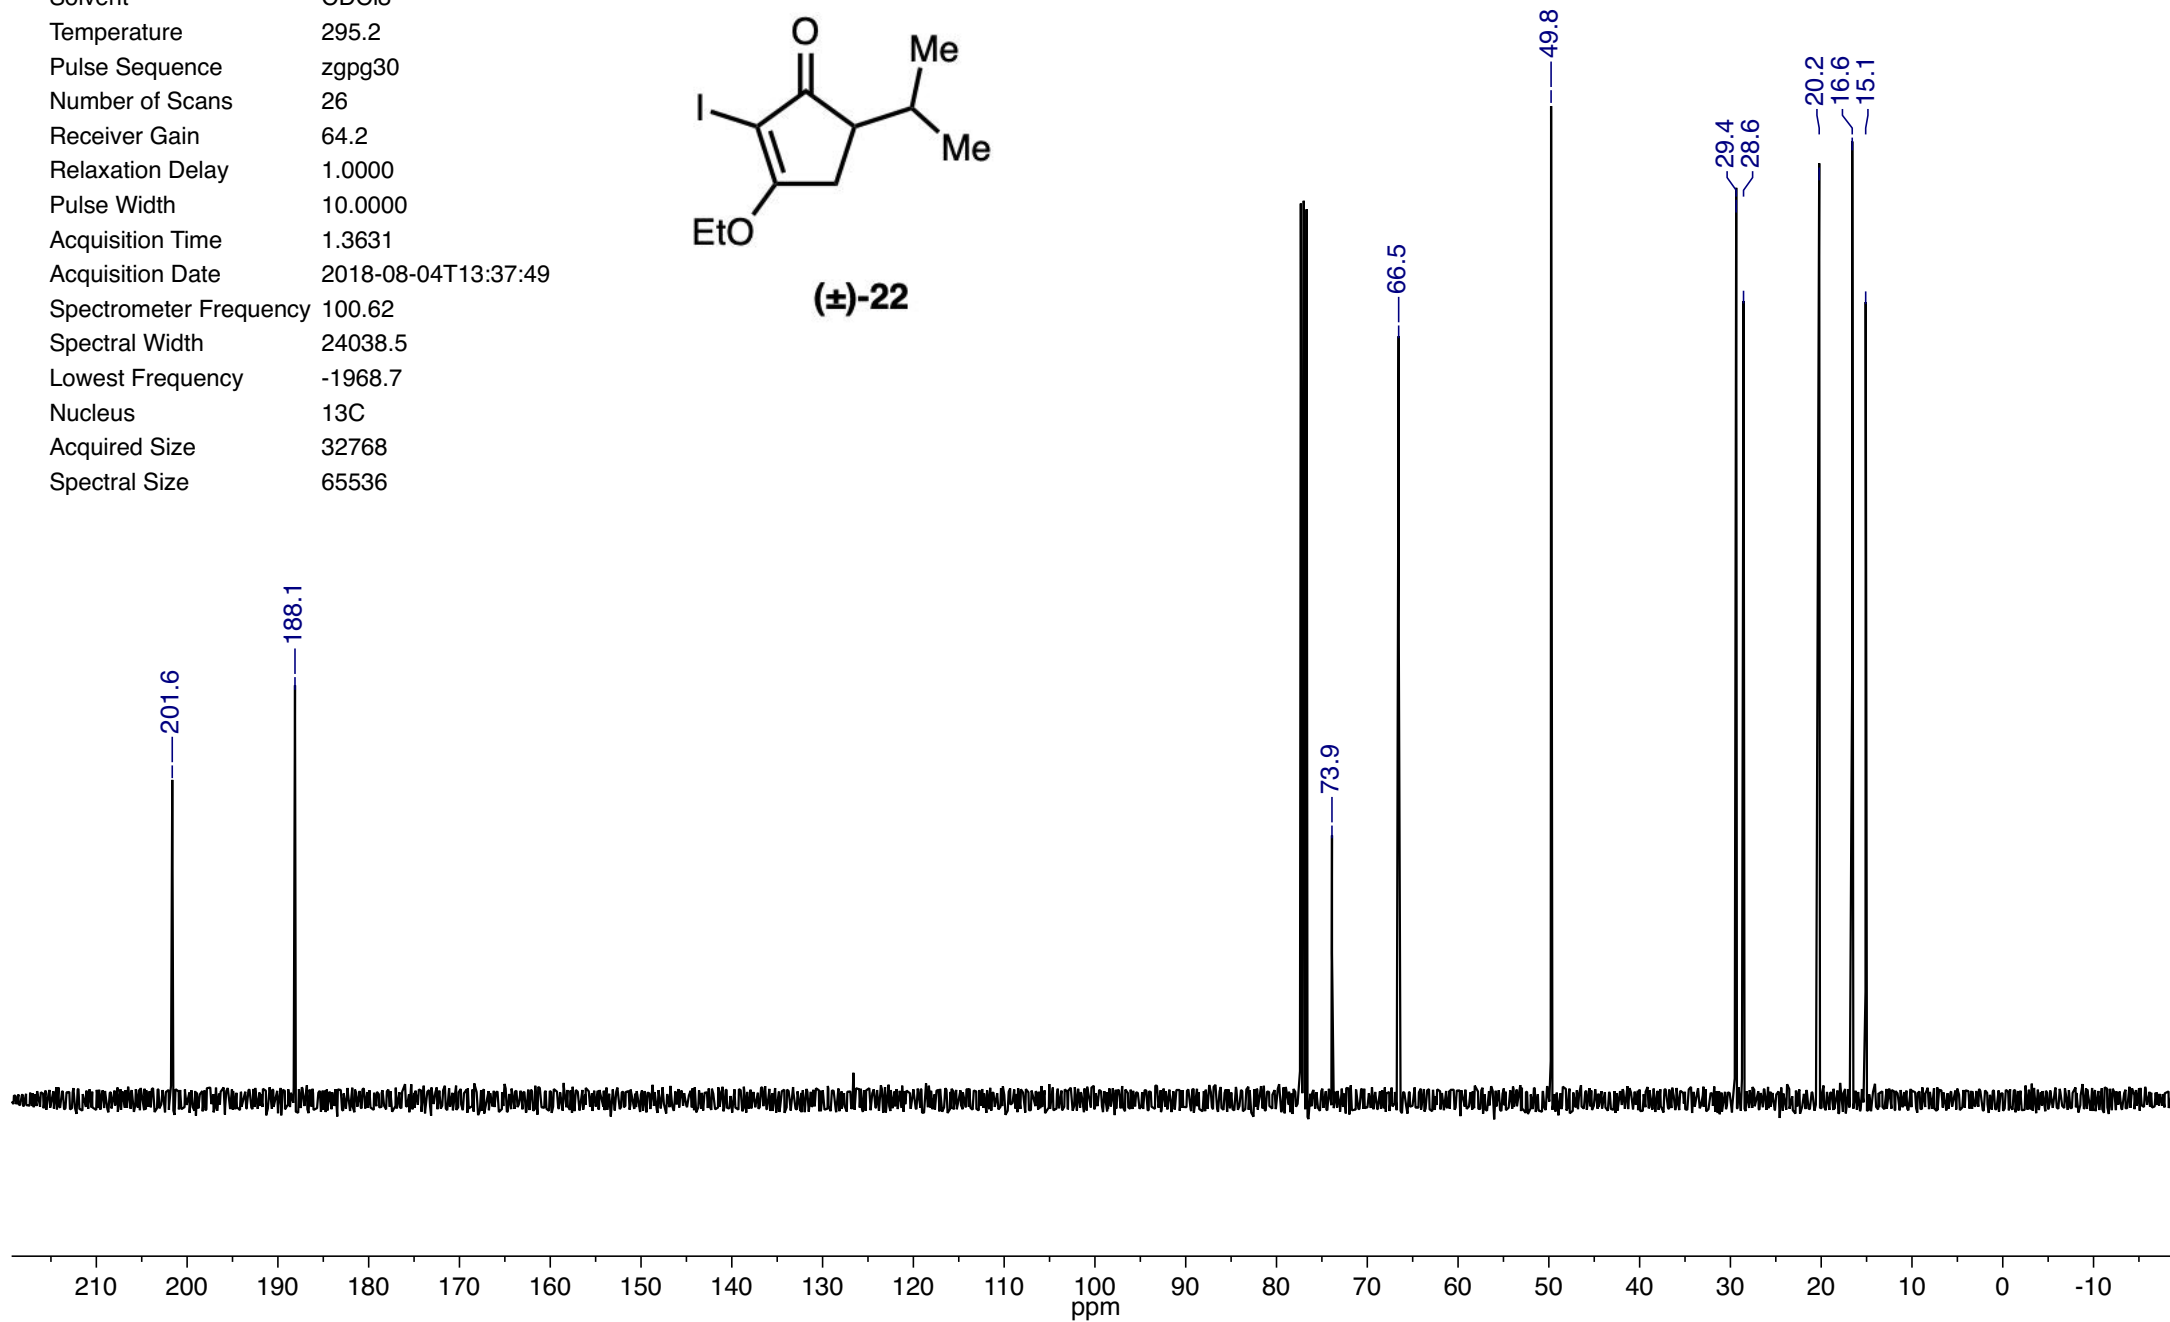

| Parameter              | Value                                       |
|------------------------|---------------------------------------------|
| Data File Name         | /Volumes/nmrdata/ahan/nmr/8-AH-169-CH/1/fid |
| Title                  | 8-AH-169-CH.1.fid                           |
| Origin                 | Bruker BioSpin GmbH                         |
| Solvent                | CDCl3                                       |
| Temperature            | 295.2                                       |
| Pulse Sequence         | zg30                                        |
| Number of Scans        | 1                                           |
| Receiver Gain          | 142.8                                       |
| Relaxation Delay       | 5.0000                                      |
| Pulse Width            | 11.7000                                     |
| Acquisition Time       | 4.0894                                      |
| Acquisition Date       | 2018-06-22T06:52:52                         |
| Spectrometer Frequency | 400.13                                      |
| Spectral Width         | 8012.8                                      |
| Lowest Frequency       | -1545.4                                     |
| Nucleus                | 1H                                          |
| Acquired Size          | 32768                                       |
| Spectral Size          | 65536                                       |

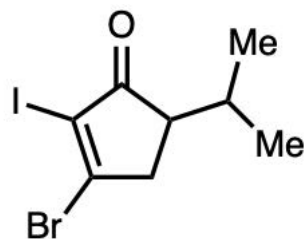**(±)-24**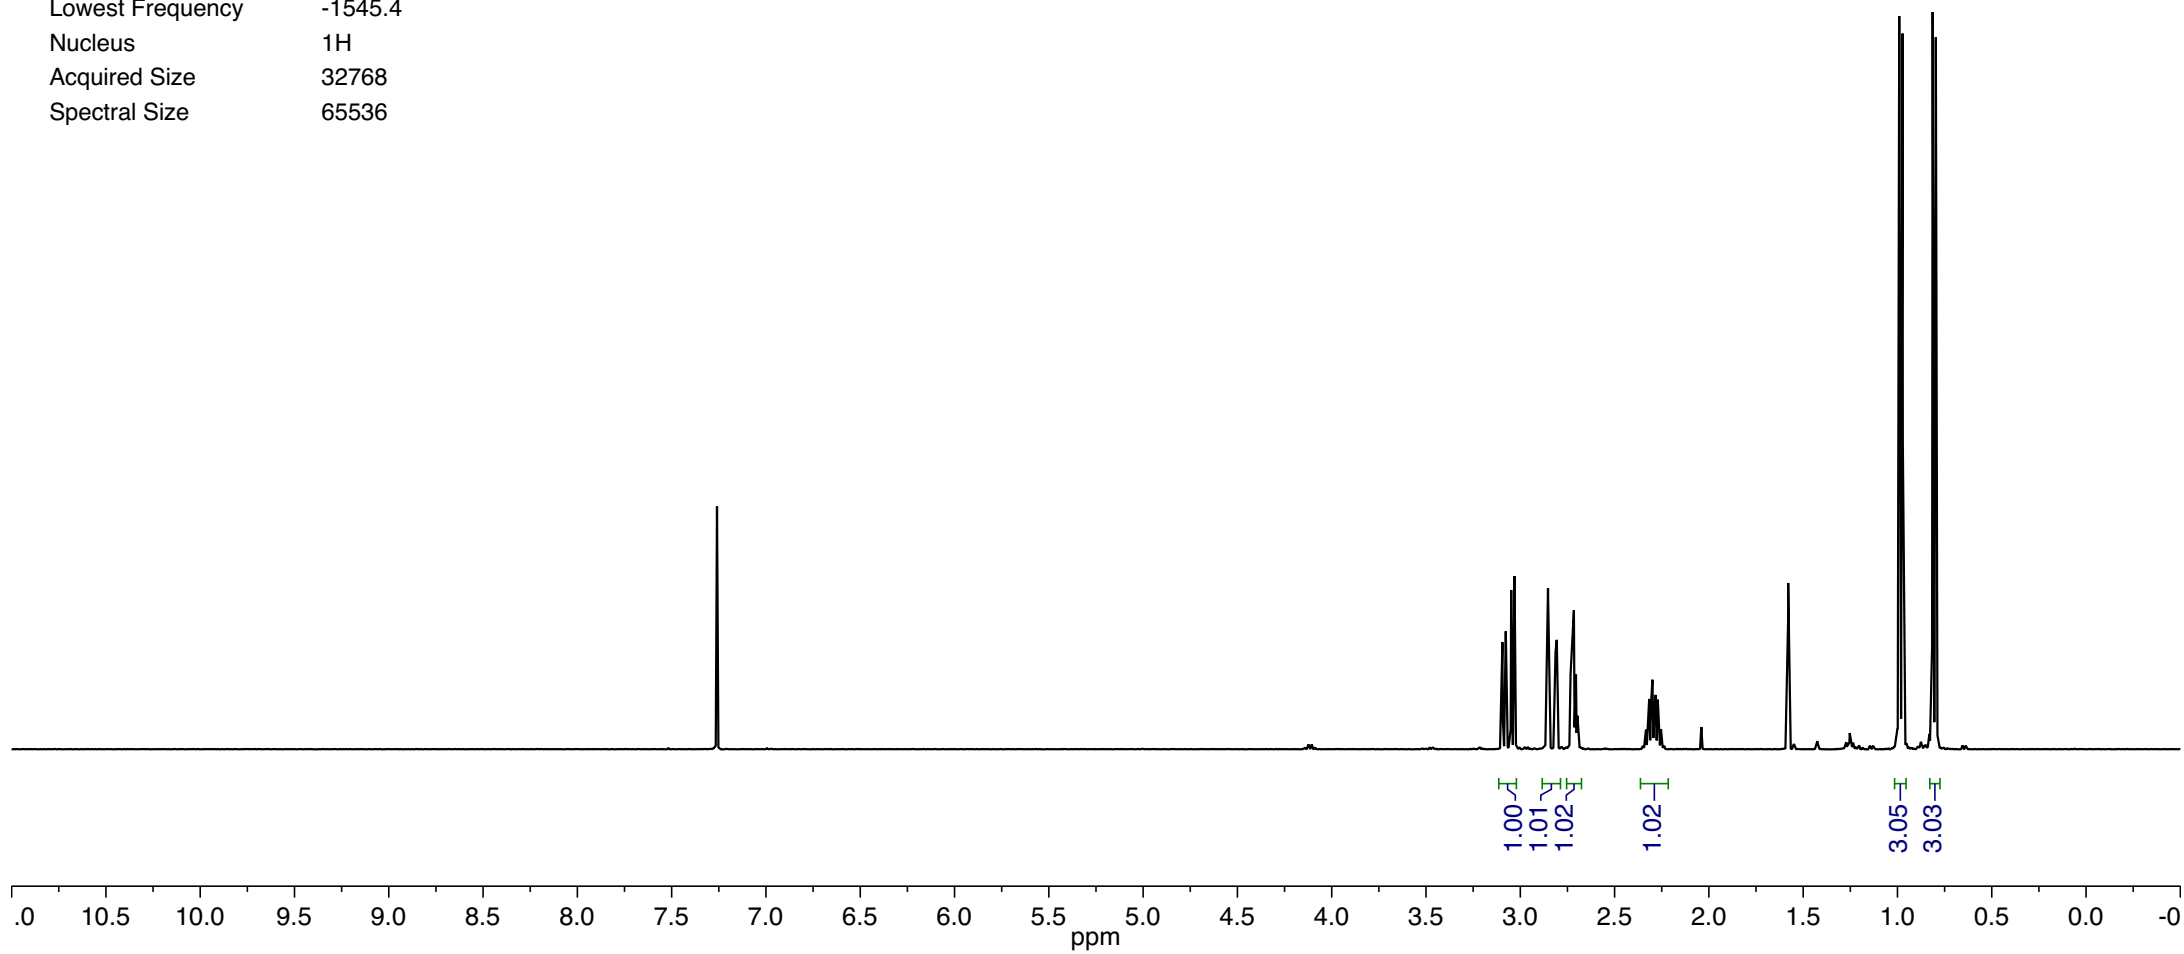

| Parameter              | Value                                              |
|------------------------|----------------------------------------------------|
| Data File Name         | / Volumes/ nmrdata/ ahan/ nmr/ 8-AH-169-CH/ 4/ fid |
| Title                  | 8-AH-169-CH.4.fid                                  |
| Origin                 | Bruker BioSpin GmbH                                |
| Solvent                | CDCl3                                              |
| Temperature            | 295.2                                              |
| Pulse Sequence         | zgpg30                                             |
| Number of Scans        | 700                                                |
| Receiver Gain          | 87.8                                               |
| Relaxation Delay       | 1.0000                                             |
| Pulse Width            | 10.0000                                            |
| Acquisition Time       | 1.3631                                             |
| Acquisition Date       | 2018-06-22T07:57:44                                |
| Spectrometer Frequency | 100.62                                             |
| Spectral Width         | 24038.5                                            |
| Lowest Frequency       | -1962.3                                            |
| Nucleus                | <sup>13</sup> C                                    |
| Acquired Size          | 32768                                              |
| Spectral Size          | 65536                                              |

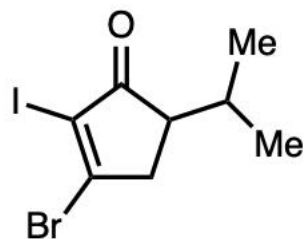**(±)-24**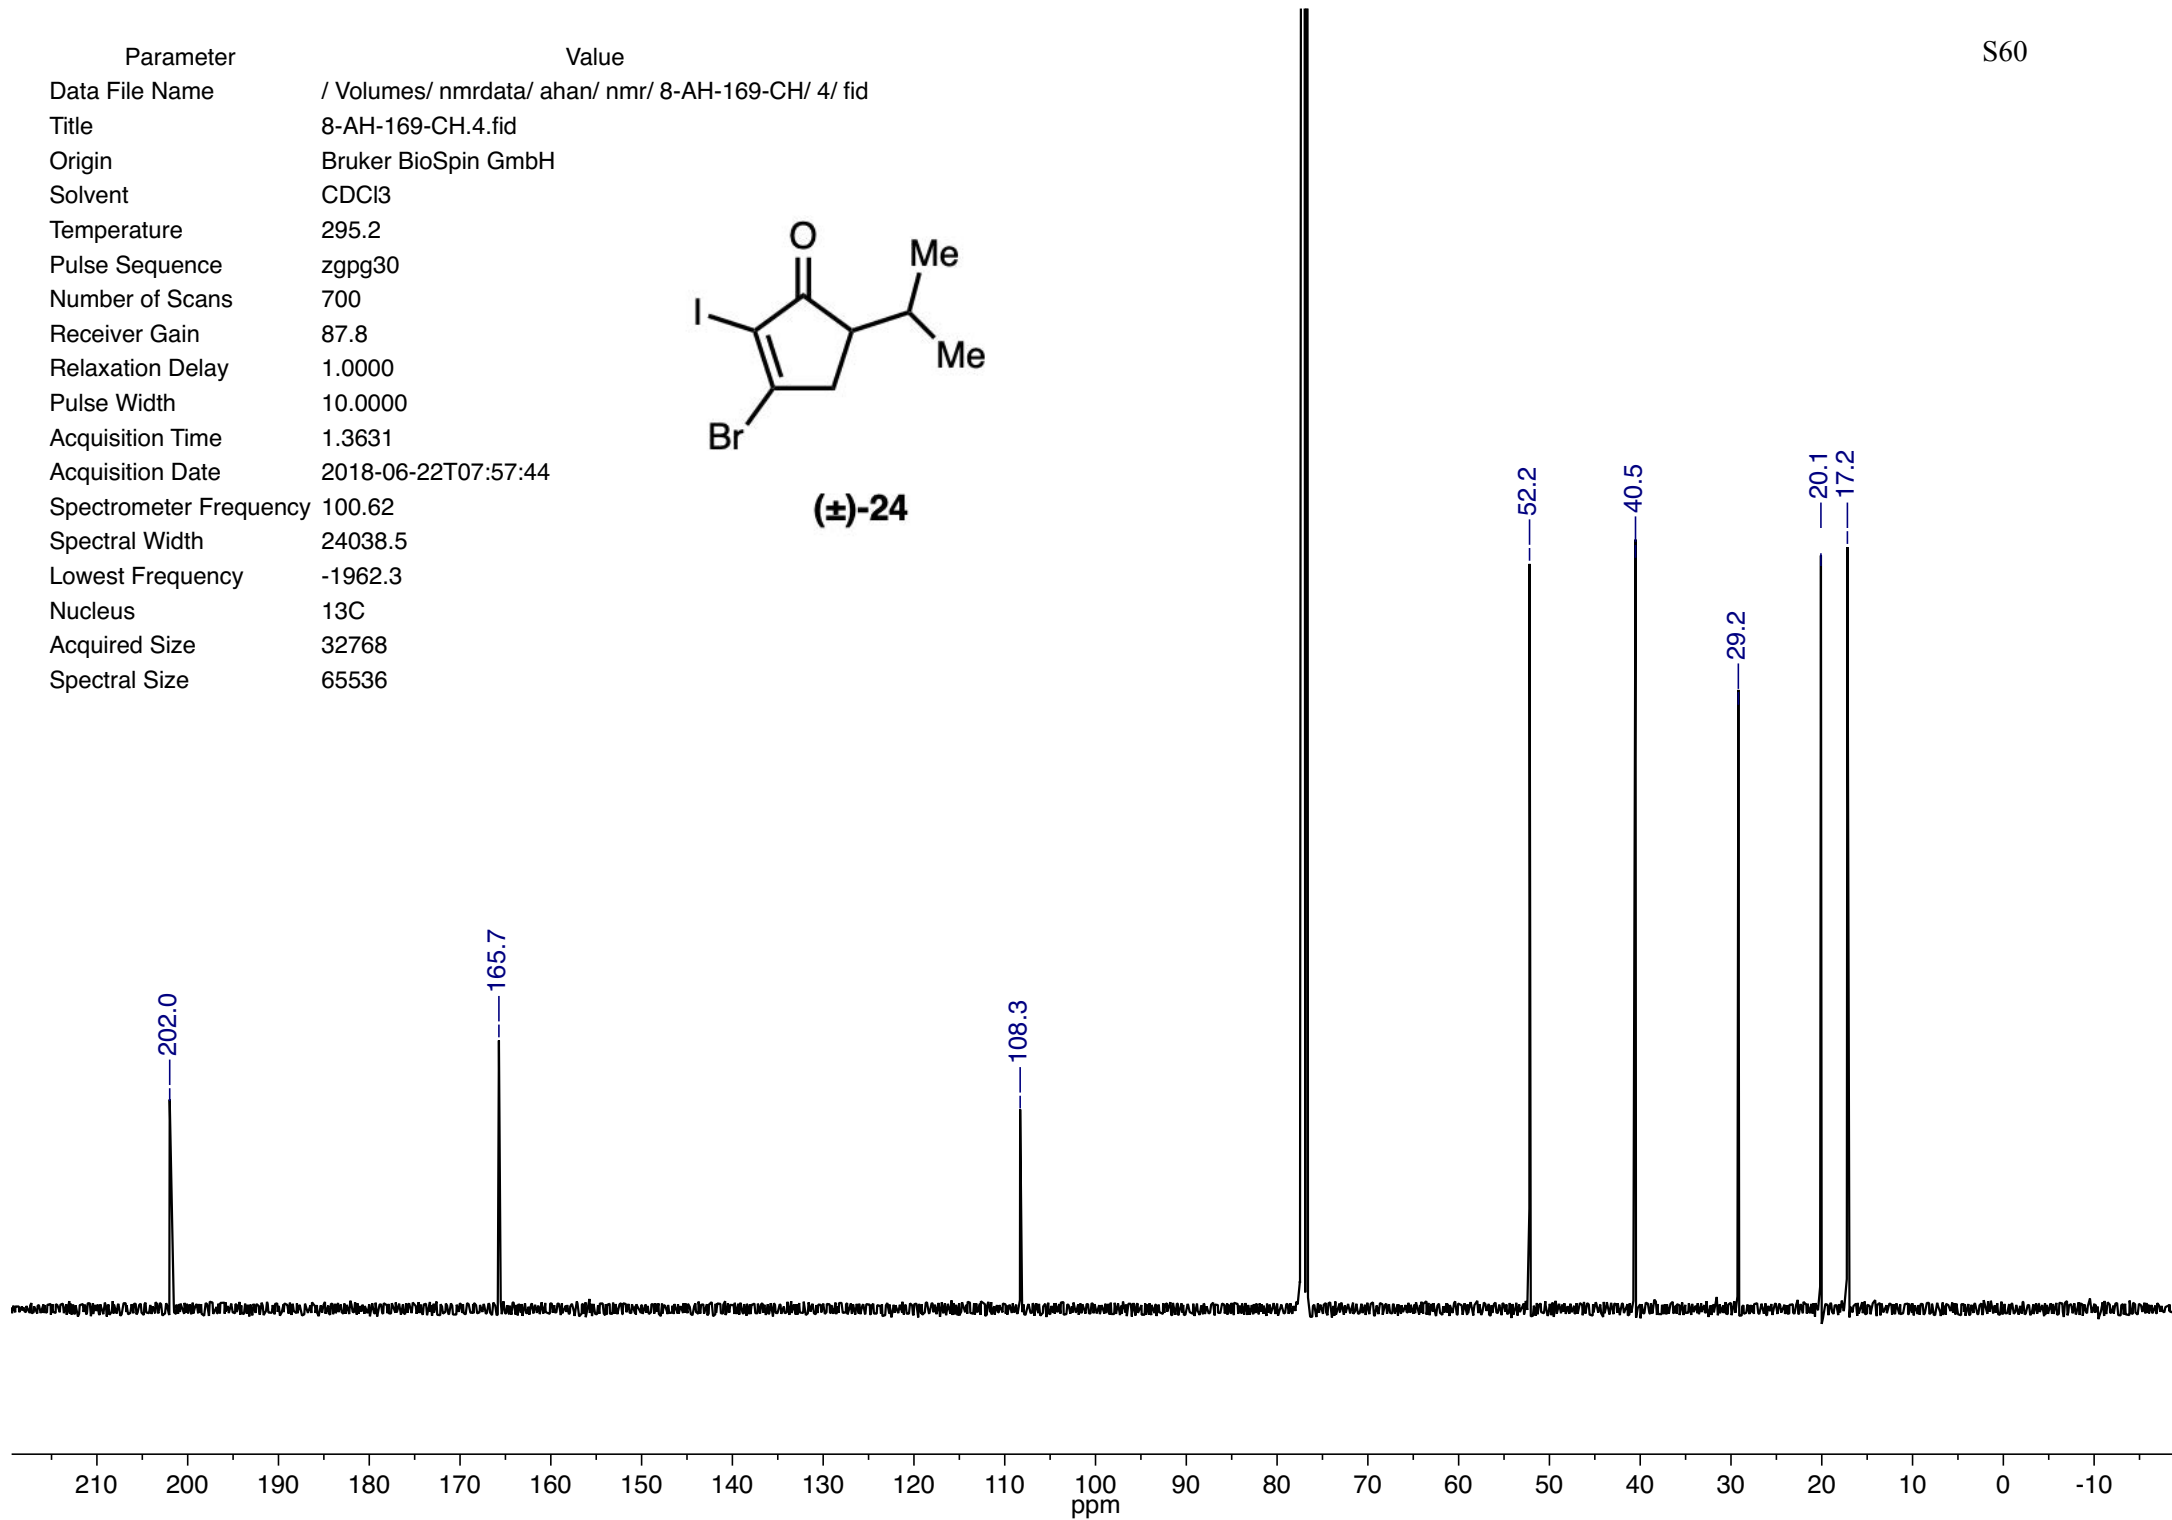



| Parameter              | Value                                       |
|------------------------|---------------------------------------------|
| Data File Name         | /Volumes/nmrdata/ahan/nmr/9-AH-075-CH/1/fid |
| Title                  | 9-AH-075-CH.1.fid                           |
| Origin                 | Bruker BioSpin GmbH                         |
| Solvent                | CDCl3                                       |
| Temperature            | 295.1                                       |
| Pulse Sequence         | zg30                                        |
| Number of Scans        | 2                                           |
| Receiver Gain          | 72.0                                        |
| Relaxation Delay       | 5.0000                                      |
| Pulse Width            | 11.7000                                     |
| Acquisition Time       | 4.0894                                      |
| Acquisition Date       | 2018-08-27T10:54:41                         |
| Spectrometer Frequency | 400.13                                      |
| Spectral Width         | 8012.8                                      |
| Lowest Frequency       | -1545.6                                     |
| Nucleus                | 1H                                          |
| Acquired Size          | 32768                                       |
| Spectral Size          | 65536                                       |

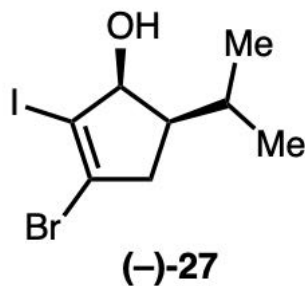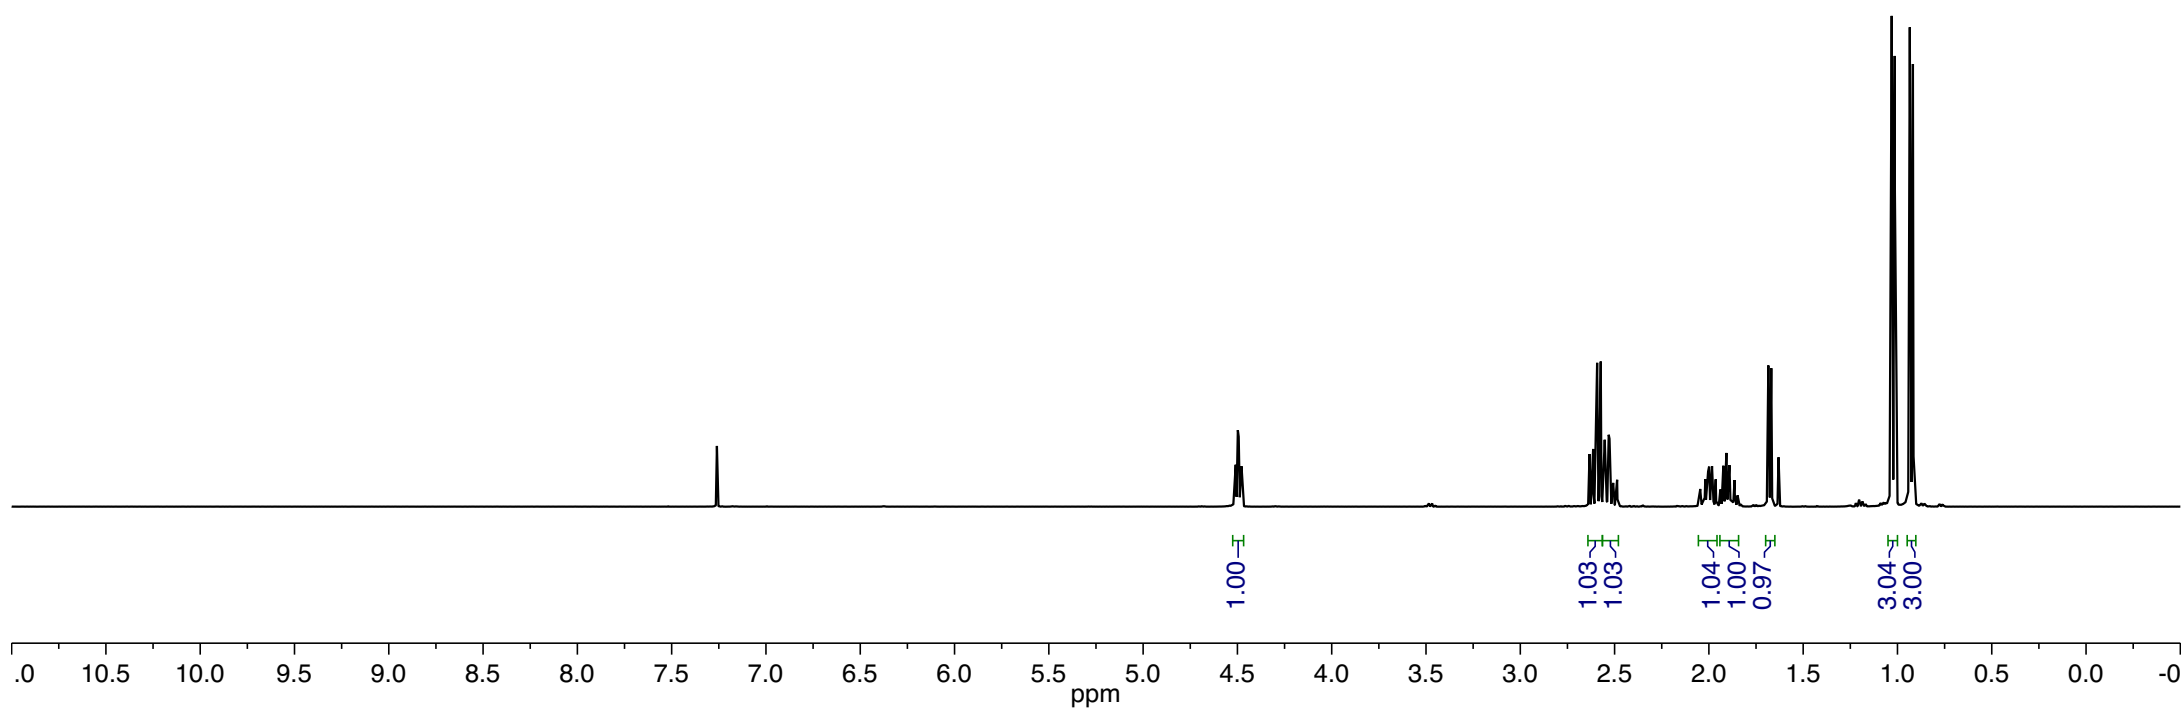

| Parameter              | Value                                              |
|------------------------|----------------------------------------------------|
| Data File Name         | / Volumes/ nmrdata/ ahan/ nmr/ 9-AH-075-CH/ 2/ fid |
| Title                  | 9-AH-075-CH.2.fid                                  |
| Origin                 | Bruker BioSpin GmbH                                |
| Solvent                | CDCl3                                              |
| Temperature            | 295.1                                              |
| Pulse Sequence         | zgpg30                                             |
| Number of Scans        | 512                                                |
| Receiver Gain          | 50.3                                               |
| Relaxation Delay       | 1.0000                                             |
| Pulse Width            | 10.0000                                            |
| Acquisition Time       | 1.3631                                             |
| Acquisition Date       | 2018-08-27T11:15:56                                |
| Spectrometer Frequency | 100.62                                             |
| Spectral Width         | 24038.5                                            |
| Lowest Frequency       | -1963.8                                            |
| Nucleus                | <sup>13</sup> C                                    |
| Acquired Size          | 32768                                              |
| Spectral Size          | 65536                                              |

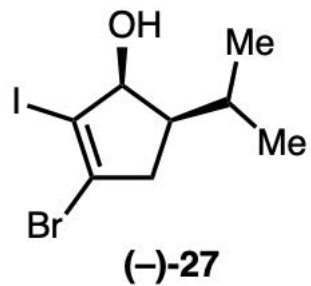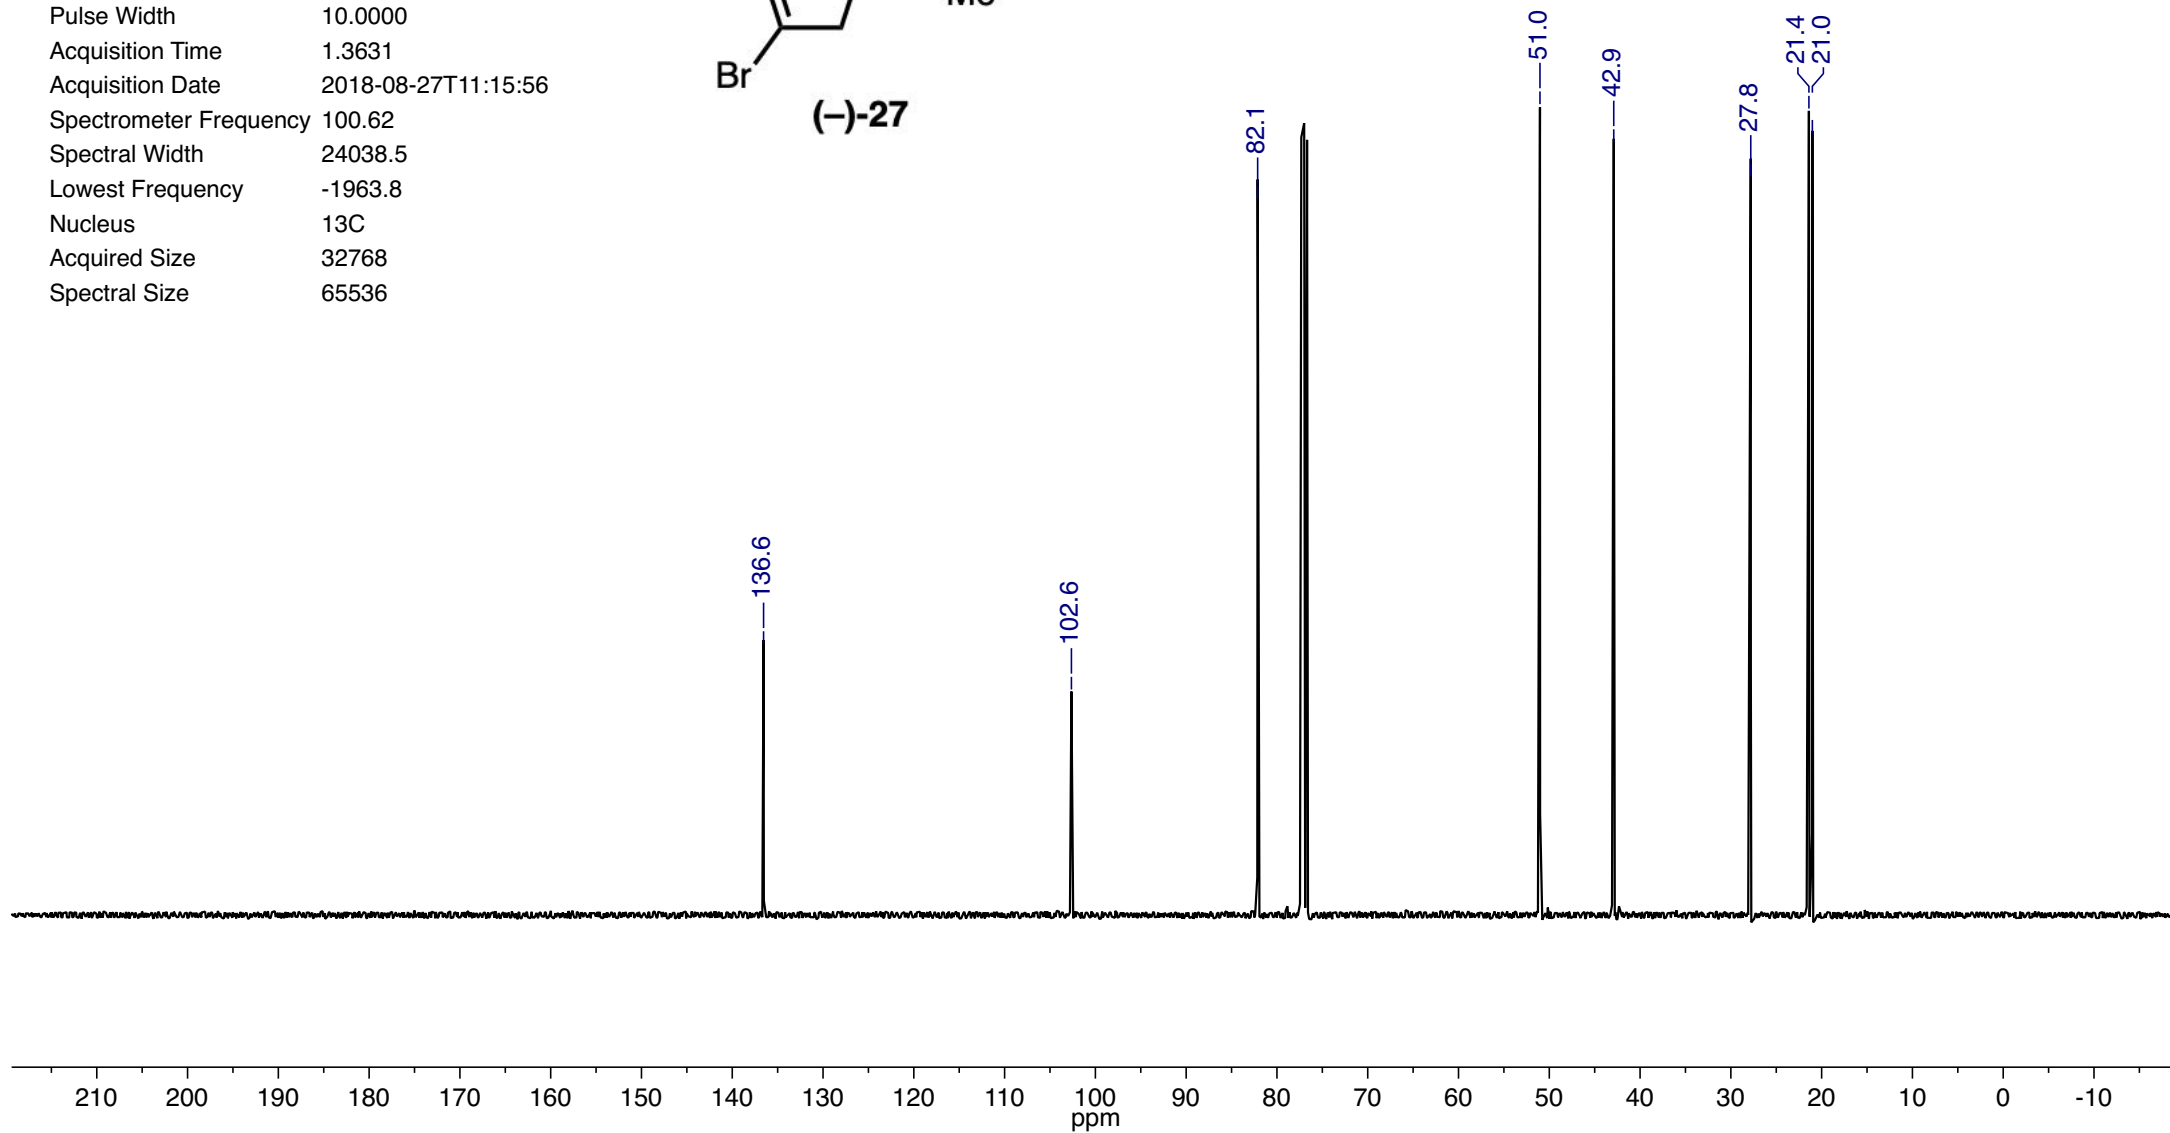

| Parameter              | Value                                       |
|------------------------|---------------------------------------------|
| Data File Name         | /Volumes/nmrdata/ahan/nmr/8-AH-198-CH/1/fid |
| Title                  | 8-AH-198-CH.1.fid                           |
| Origin                 | Bruker BioSpin GmbH                         |
| Solvent                | CDCl3                                       |
| Temperature            | 297.2                                       |
| Pulse Sequence         | zg30                                        |
| Number of Scans        | 16                                          |
| Receiver Gain          | 176.8                                       |
| Relaxation Delay       | 5.0000                                      |
| Pulse Width            | 11.7000                                     |
| Acquisition Time       | 4.0894                                      |
| Acquisition Date       | 2018-06-18T17:48:08                         |
| Spectrometer Frequency | 400.13                                      |
| Spectral Width         | 8012.8                                      |
| Lowest Frequency       | -1545.2                                     |
| Nucleus                | 1H                                          |
| Acquired Size          | 32768                                       |
| Spectral Size          | 65536                                       |

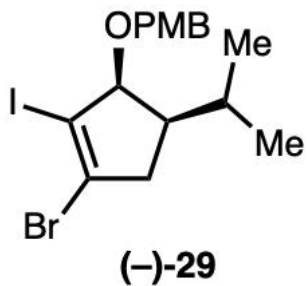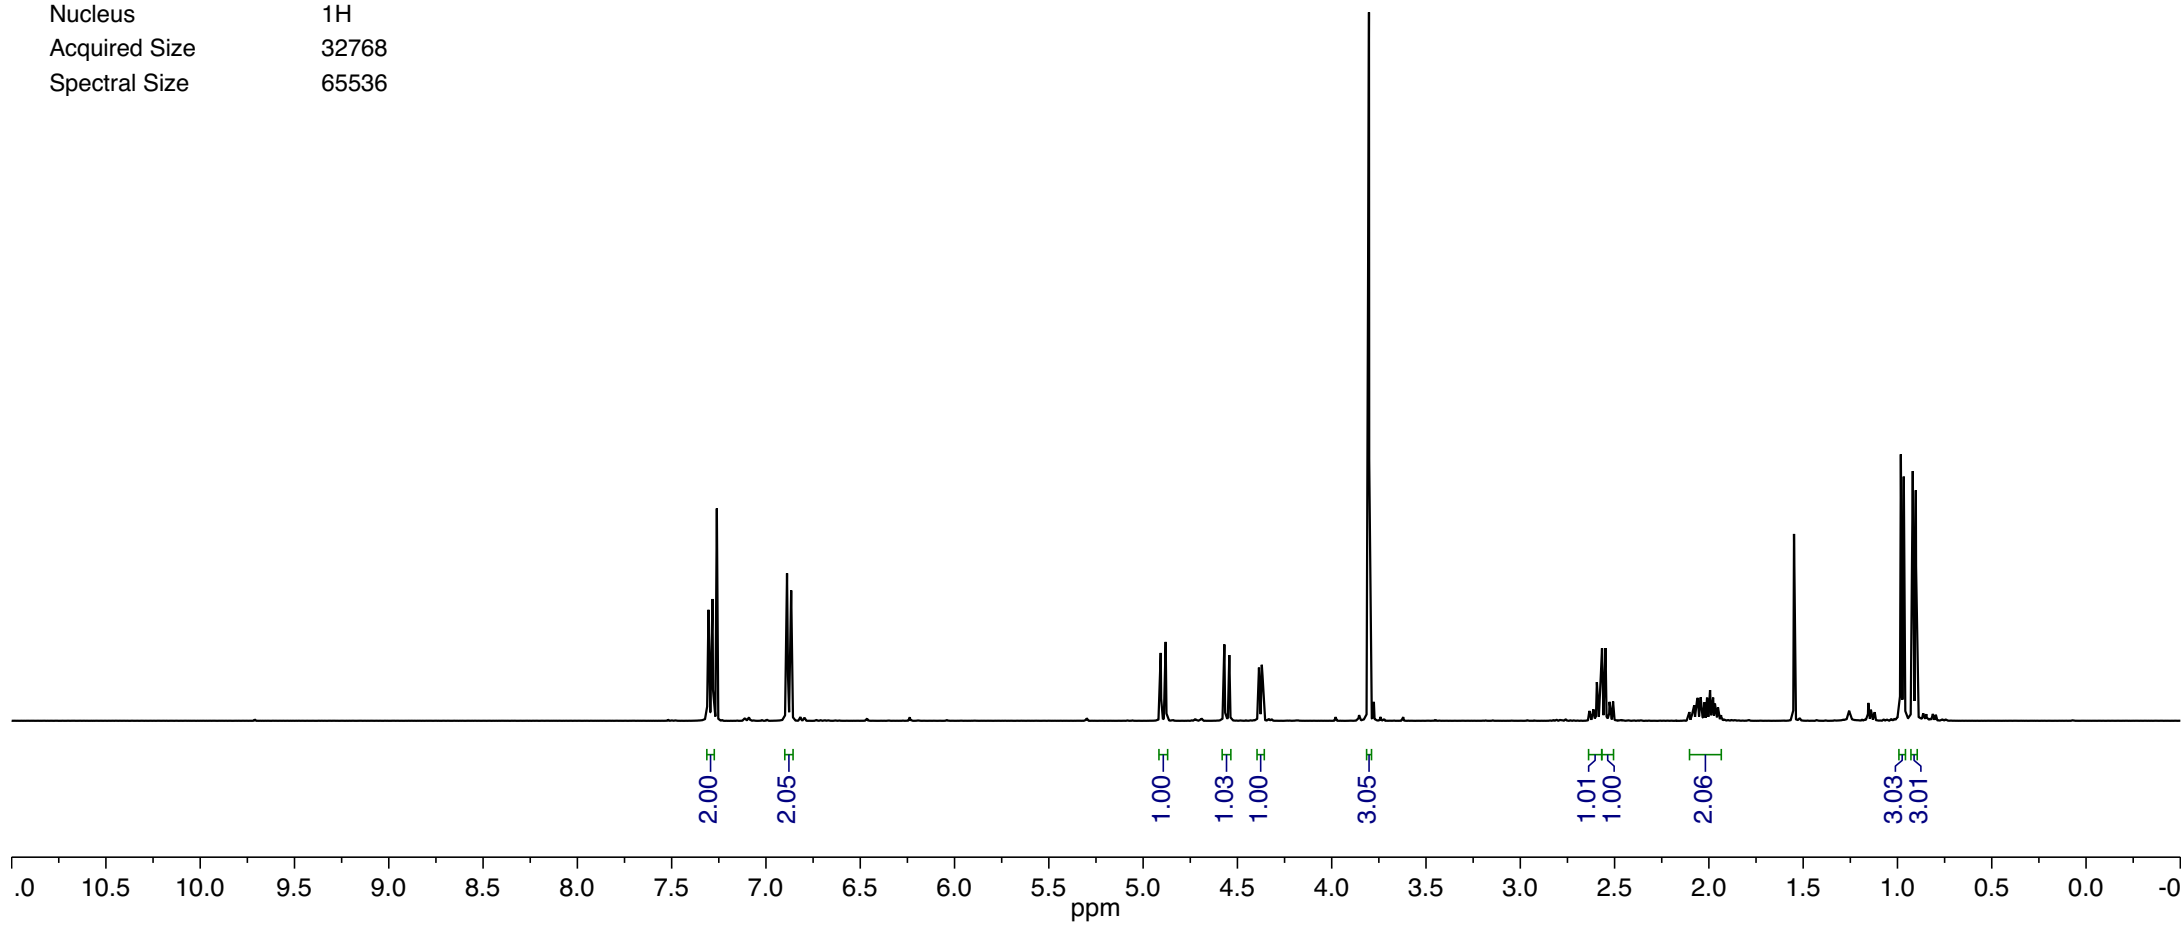

| Parameter              | Value                                              |
|------------------------|----------------------------------------------------|
| Data File Name         | / Volumes/ nmrdata/ ahan/ nmr/ 8-AH-198-CH/ 6/ fid |
| Title                  | 8-AH-198-CH.6.fid                                  |
| Origin                 | Bruker BioSpin GmbH                                |
| Solvent                | CDCl3                                              |
| Temperature            | 297.1                                              |
| Pulse Sequence         | zgpg30                                             |
| Number of Scans        | 800                                                |
| Receiver Gain          | 72.0                                               |
| Relaxation Delay       | 1.0000                                             |
| Pulse Width            | 10.0000                                            |
| Acquisition Time       | 1.3631                                             |
| Acquisition Date       | 2018-06-19T02:41:45                                |
| Spectrometer Frequency | 100.62                                             |
| Spectral Width         | 24038.5                                            |
| Lowest Frequency       | -1960.9                                            |
| Nucleus                | 13C                                                |
| Acquired Size          | 32768                                              |
| Spectral Size          | 65536                                              |

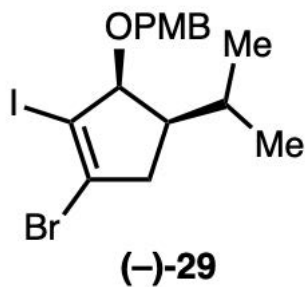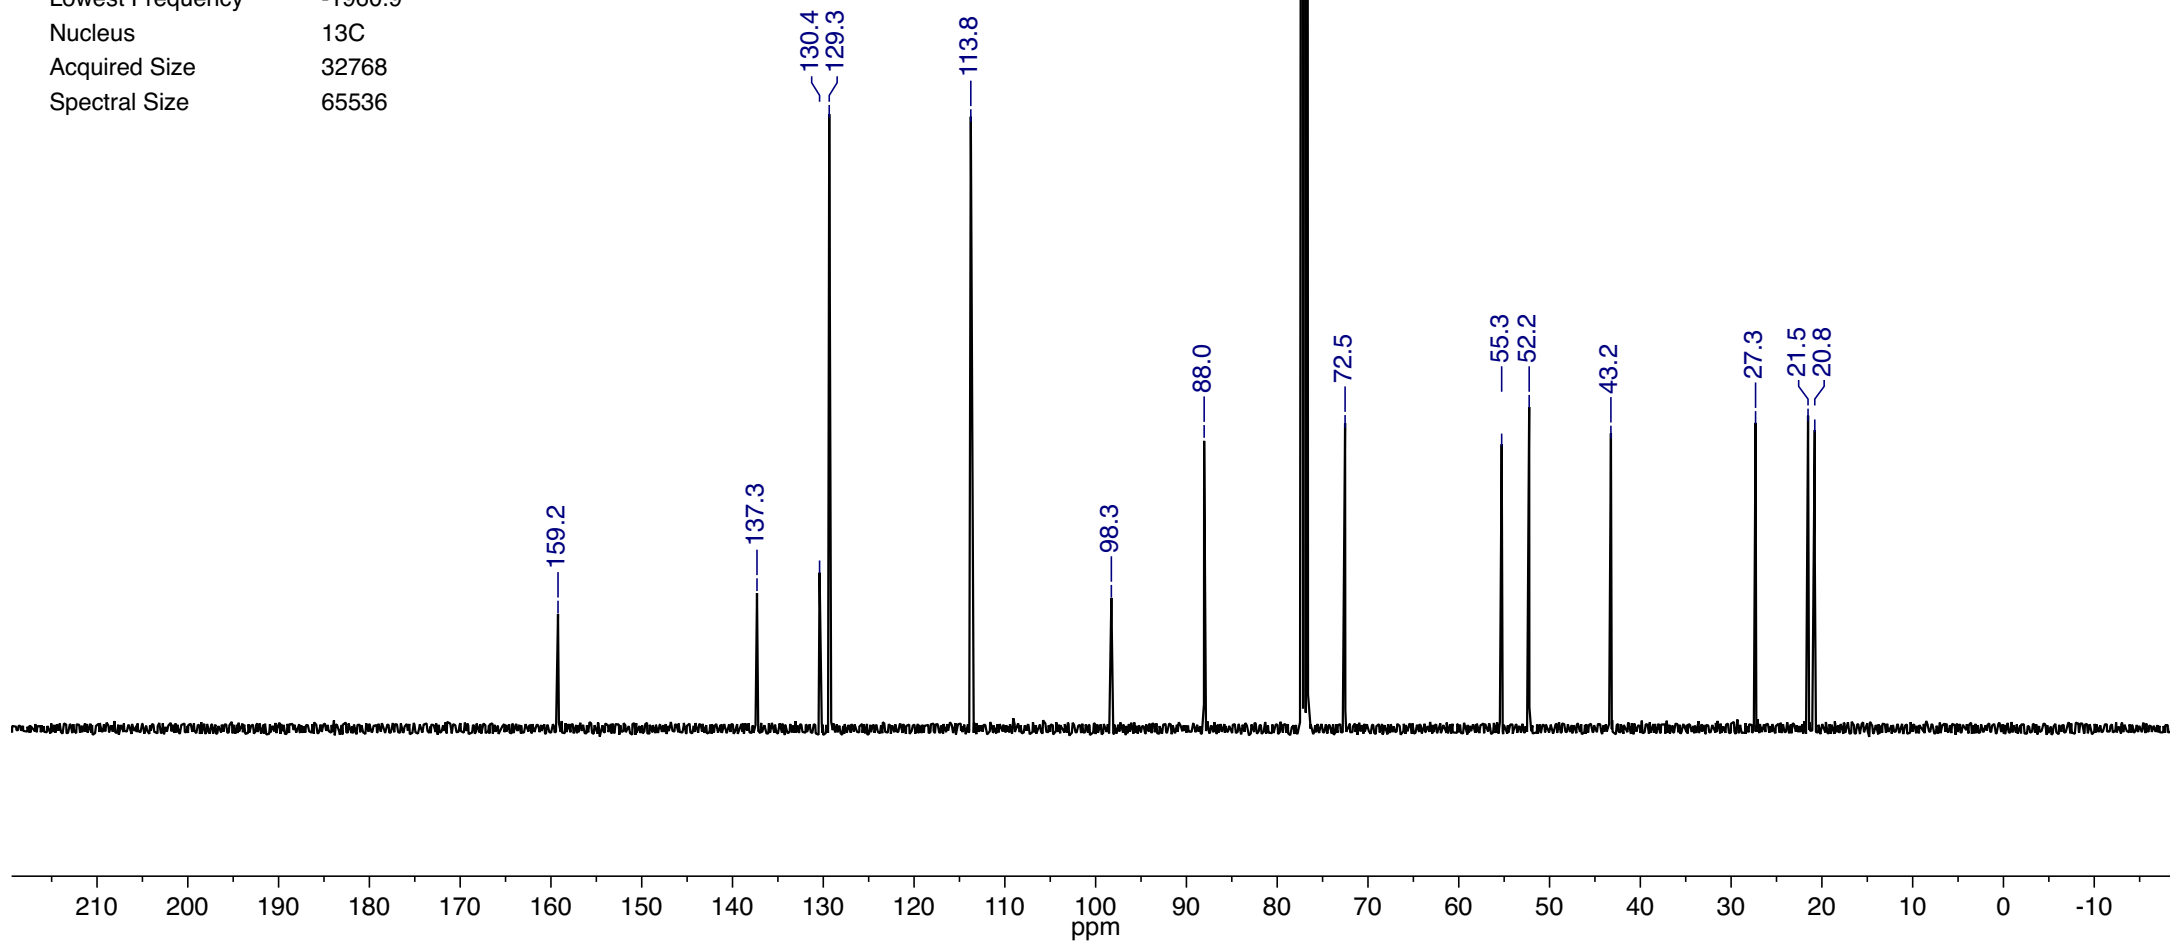

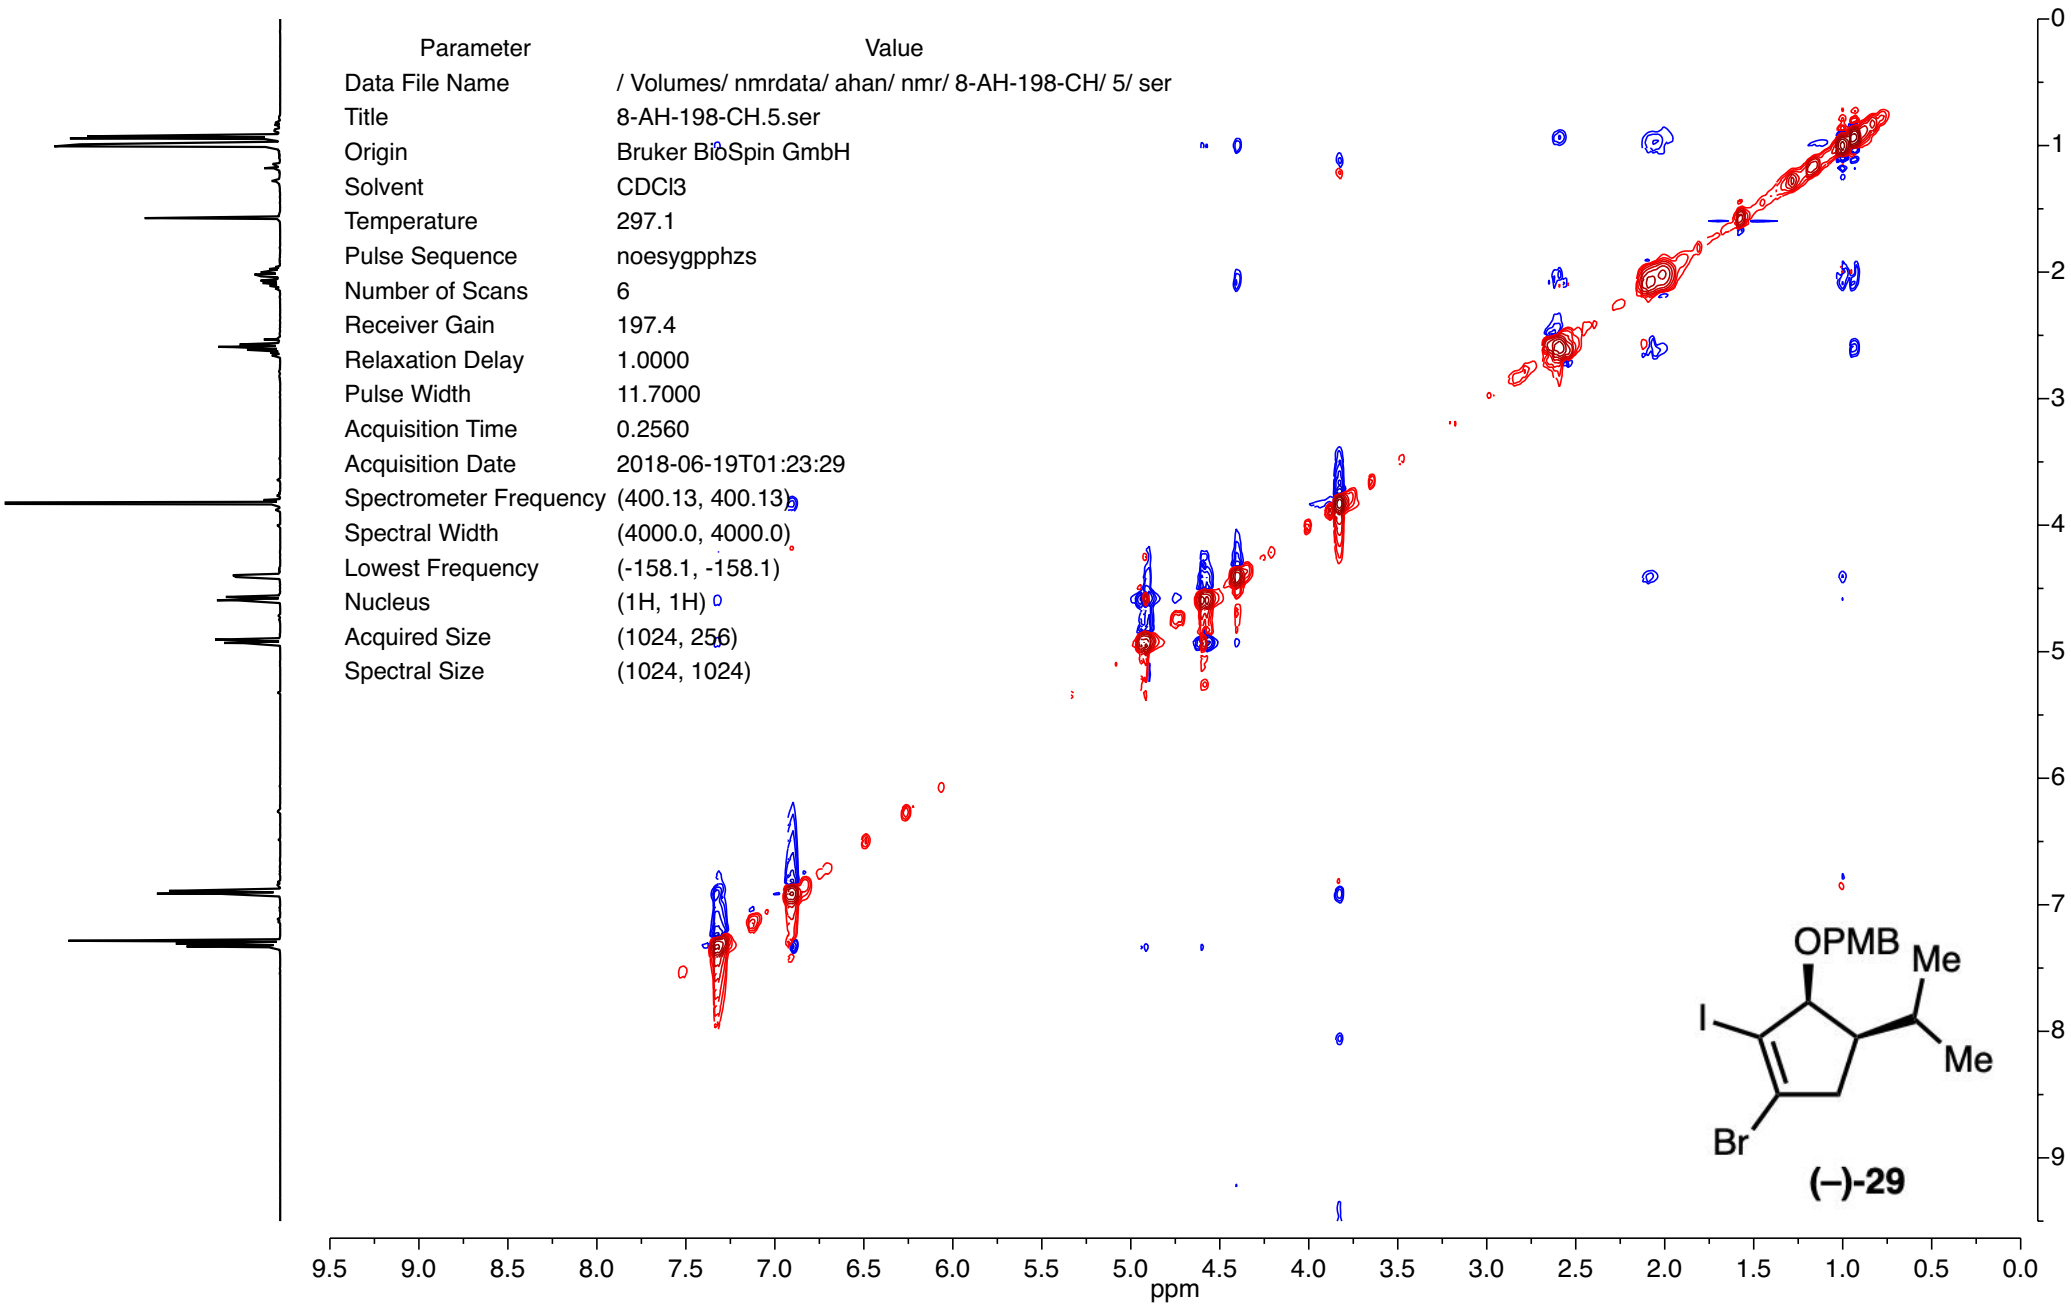

| Parameter              | Value                                                |
|------------------------|------------------------------------------------------|
| Data File Name         | / Volumes/ nmrdata/ ahan/ nmr/ 9-AH-079-1-CH/ 1/ fid |
| Title                  | 9-AH-079-1-CH.1.fid                                  |
| Origin                 | Bruker BioSpin GmbH                                  |
| Solvent                | CDCl3                                                |
| Temperature            | 295.1                                                |
| Pulse Sequence         | zg30                                                 |
| Number of Scans        | 8                                                    |
| Receiver Gain          | 197.4                                                |
| Relaxation Delay       | 5.0000                                               |
| Pulse Width            | 11.7000                                              |
| Acquisition Time       | 4.0894                                               |
| Acquisition Date       | 2018-09-13T18:51:25                                  |
| Spectrometer Frequency | 400.13                                               |
| Spectral Width         | 8012.8                                               |
| Lowest Frequency       | -1545.6                                              |
| Nucleus                | 1H                                                   |
| Acquired Size          | 32768                                                |
| Spectral Size          | 65536                                                |

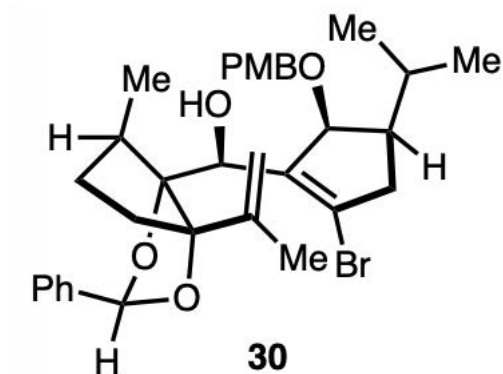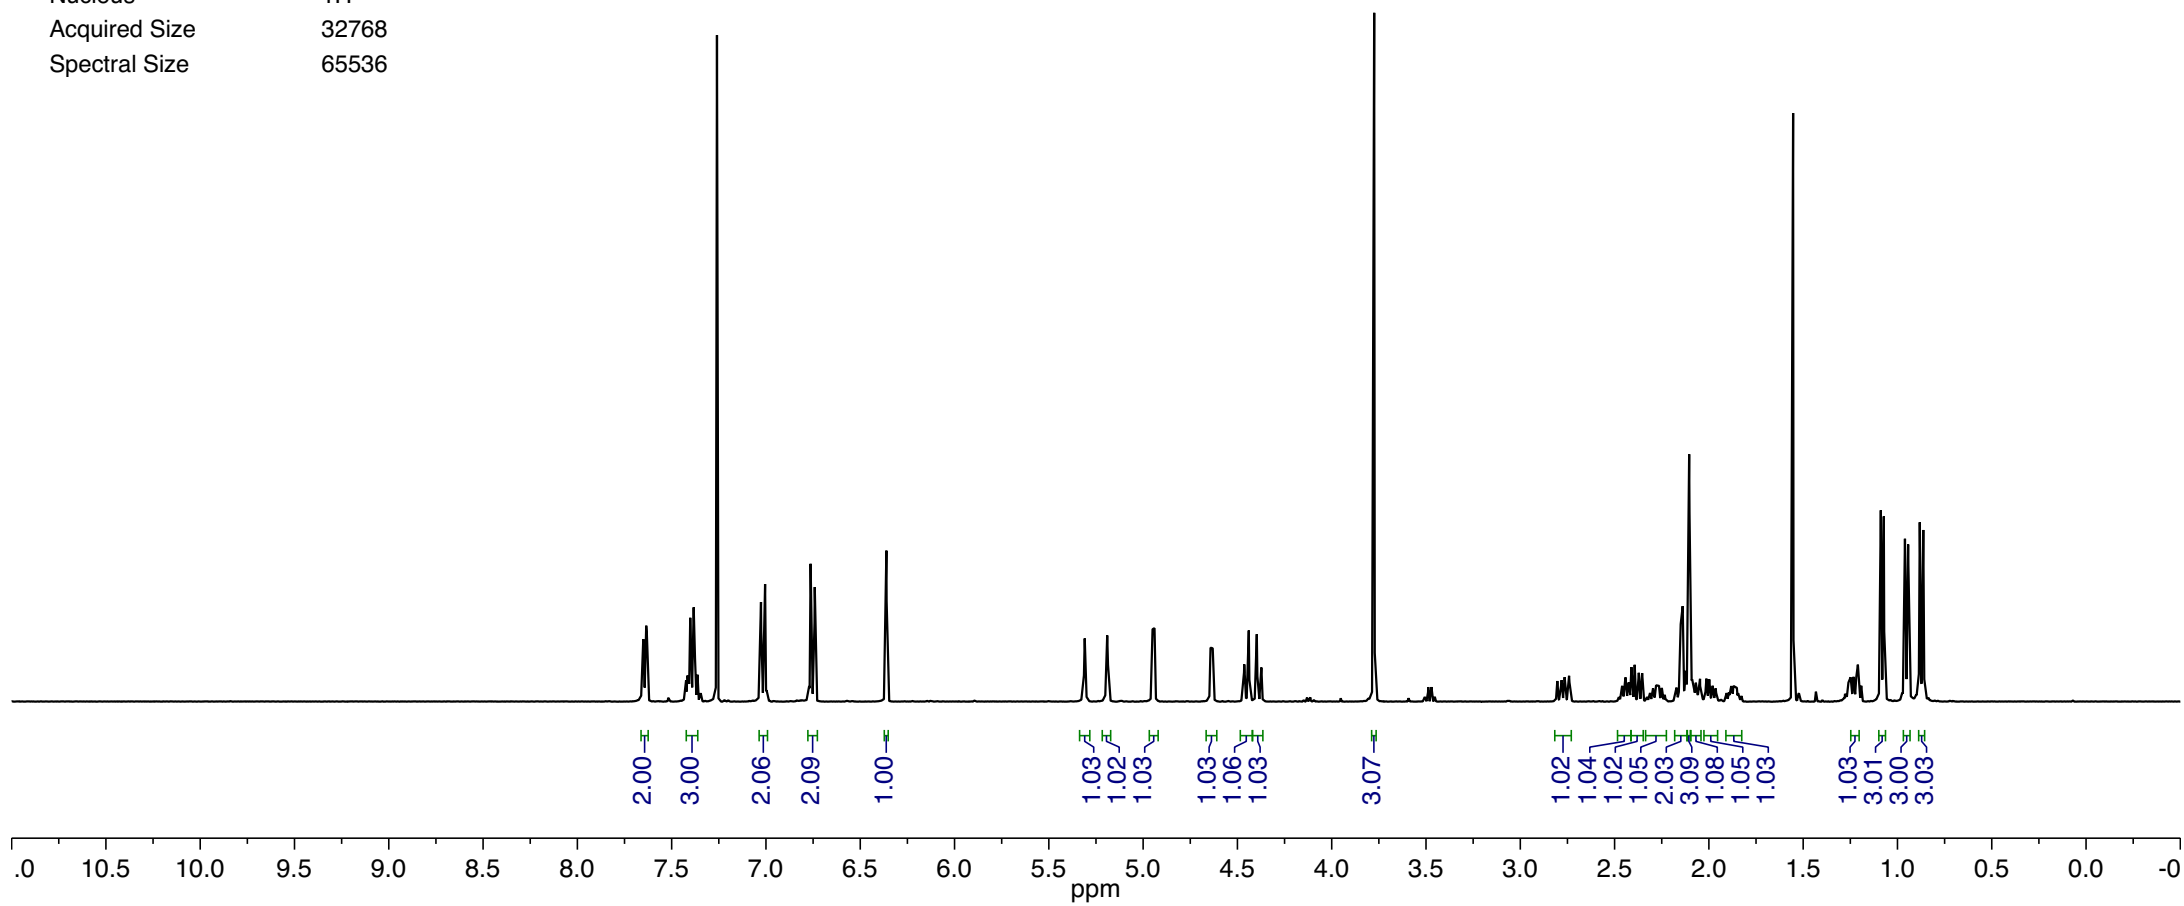

| Parameter              | Value                                                |
|------------------------|------------------------------------------------------|
| Data File Name         | / Volumes/ nmrdata/ ahan/ nmr/ 9-AH-079-1-CH/ 2/ fid |
| Title                  | 9-AH-079-1-CH.2.fid                                  |
| Origin                 | Bruker BioSpin GmbH                                  |
| Solvent                | CDCl3                                                |
| Temperature            | 295.1                                                |
| Pulse Sequence         | zgpg30                                               |
| Number of Scans        | 1000                                                 |
| Receiver Gain          | 64.2                                                 |
| Relaxation Delay       | 1.0000                                               |
| Pulse Width            | 10.0000                                              |
| Acquisition Time       | 1.3631                                               |
| Acquisition Date       | 2018-09-13T19:32:54                                  |
| Spectrometer Frequency | 100.62                                               |
| Spectral Width         | 24038.5                                              |
| Lowest Frequency       | -1961.2                                              |
| Nucleus                | <sup>13</sup> C                                      |
| Acquired Size          | 32768                                                |
| Spectral Size          | 65536                                                |

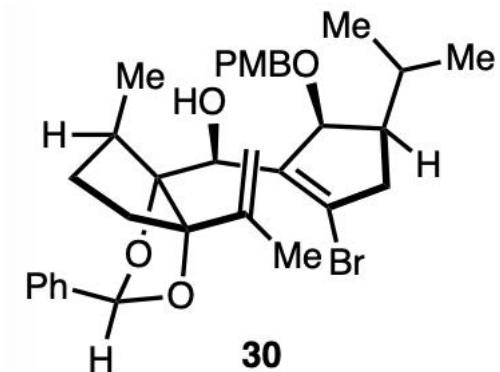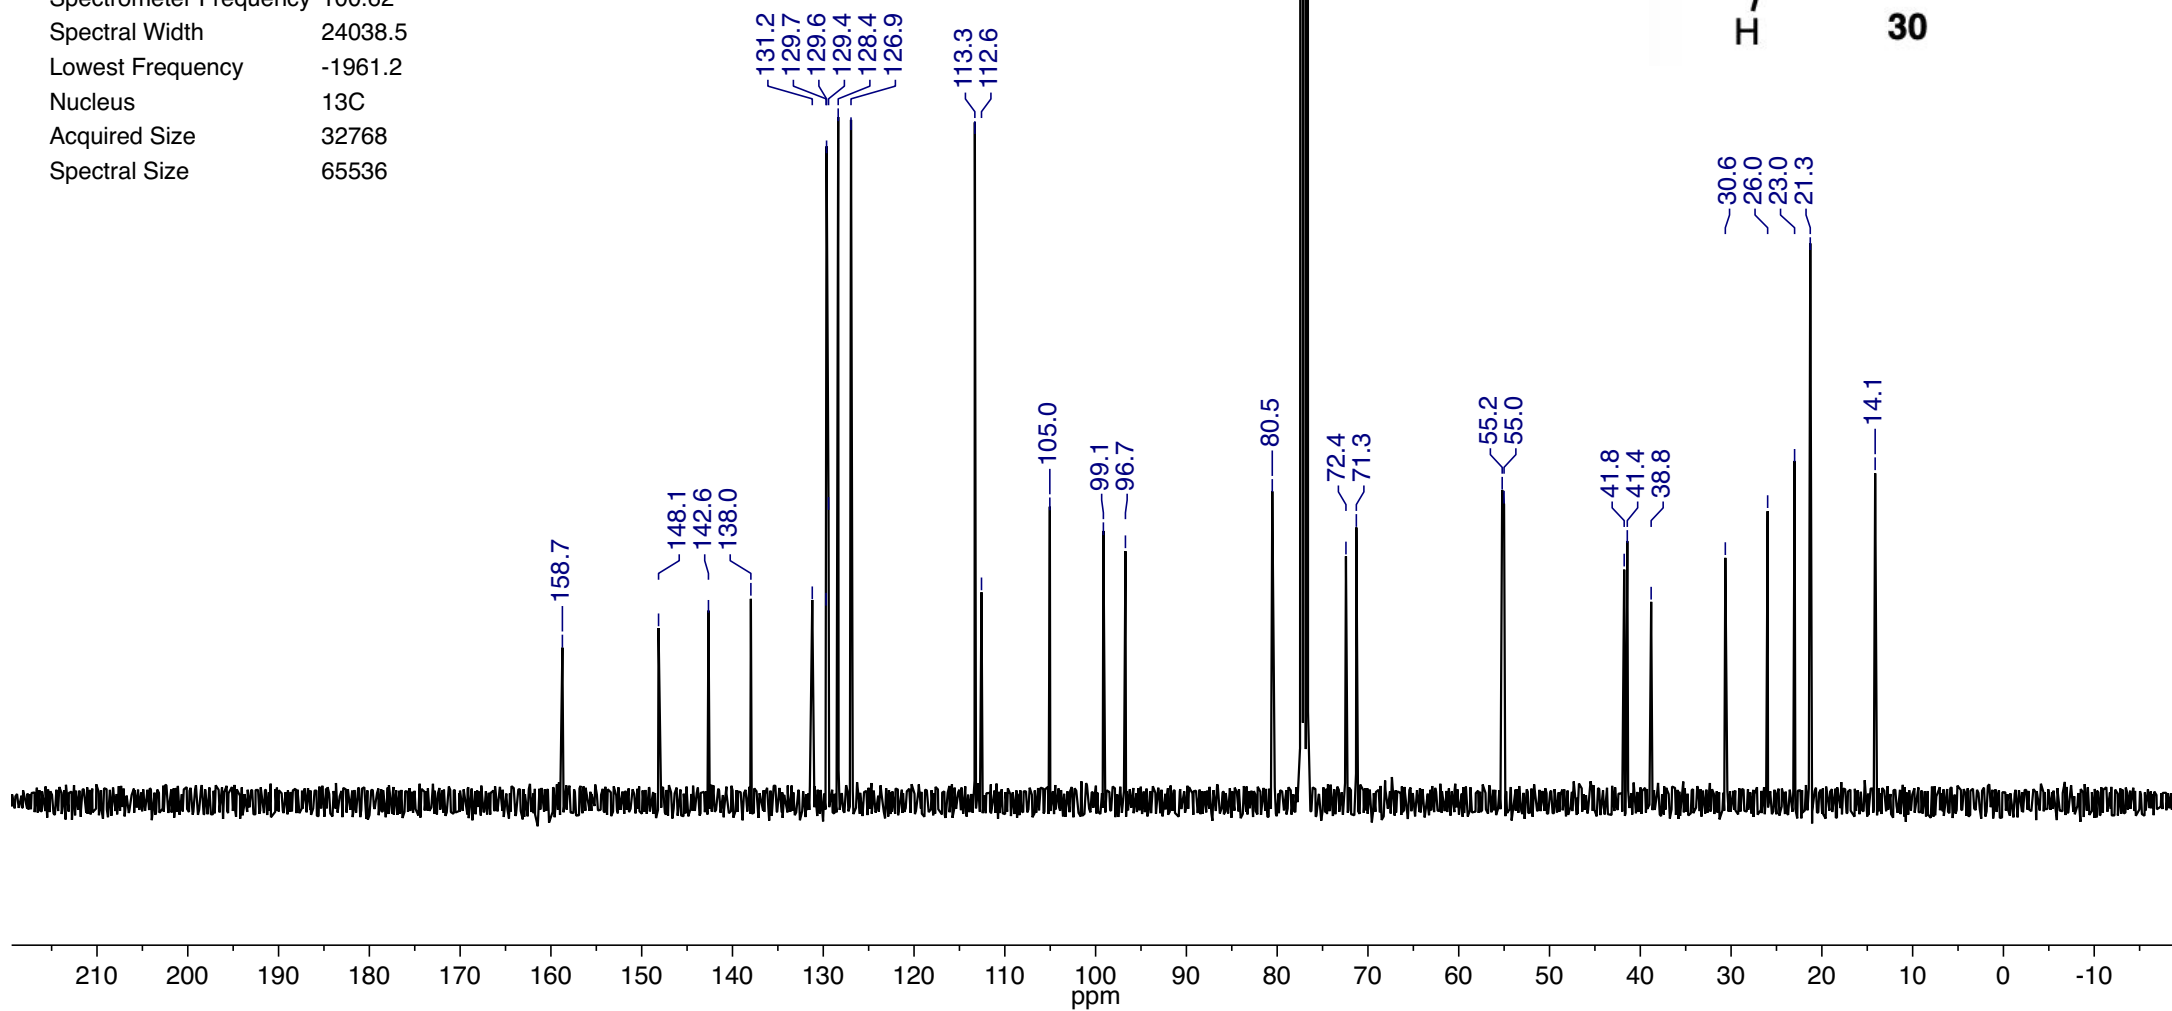

| Parameter              | Value                                      |
|------------------------|--------------------------------------------|
| Data File Name         | /Volumes/nmrdata/ahan/nmr/9-AH-079-P/1/fid |
| Title                  | 9-AH-079-P.1.fid                           |
| Origin                 | Bruker BioSpin GmbH                        |
| Solvent                | CDCl3                                      |
| Temperature            | 295.2                                      |
| Pulse Sequence         | zg30                                       |
| Number of Scans        | 4                                          |
| Receiver Gain          | 127.1                                      |
| Relaxation Delay       | 5.0000                                     |
| Pulse Width            | 11.7000                                    |
| Acquisition Time       | 4.0894                                     |
| Acquisition Date       | 2018-09-01T16:37:40                        |
| Spectrometer Frequency | 400.13                                     |
| Spectral Width         | 8012.8                                     |
| Lowest Frequency       | -1545.2                                    |
| Nucleus                | 1H                                         |
| Acquired Size          | 32768                                      |
| Spectral Size          | 65536                                      |

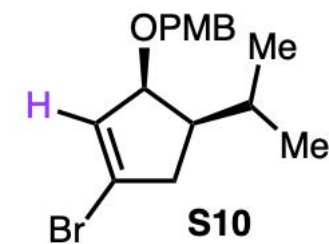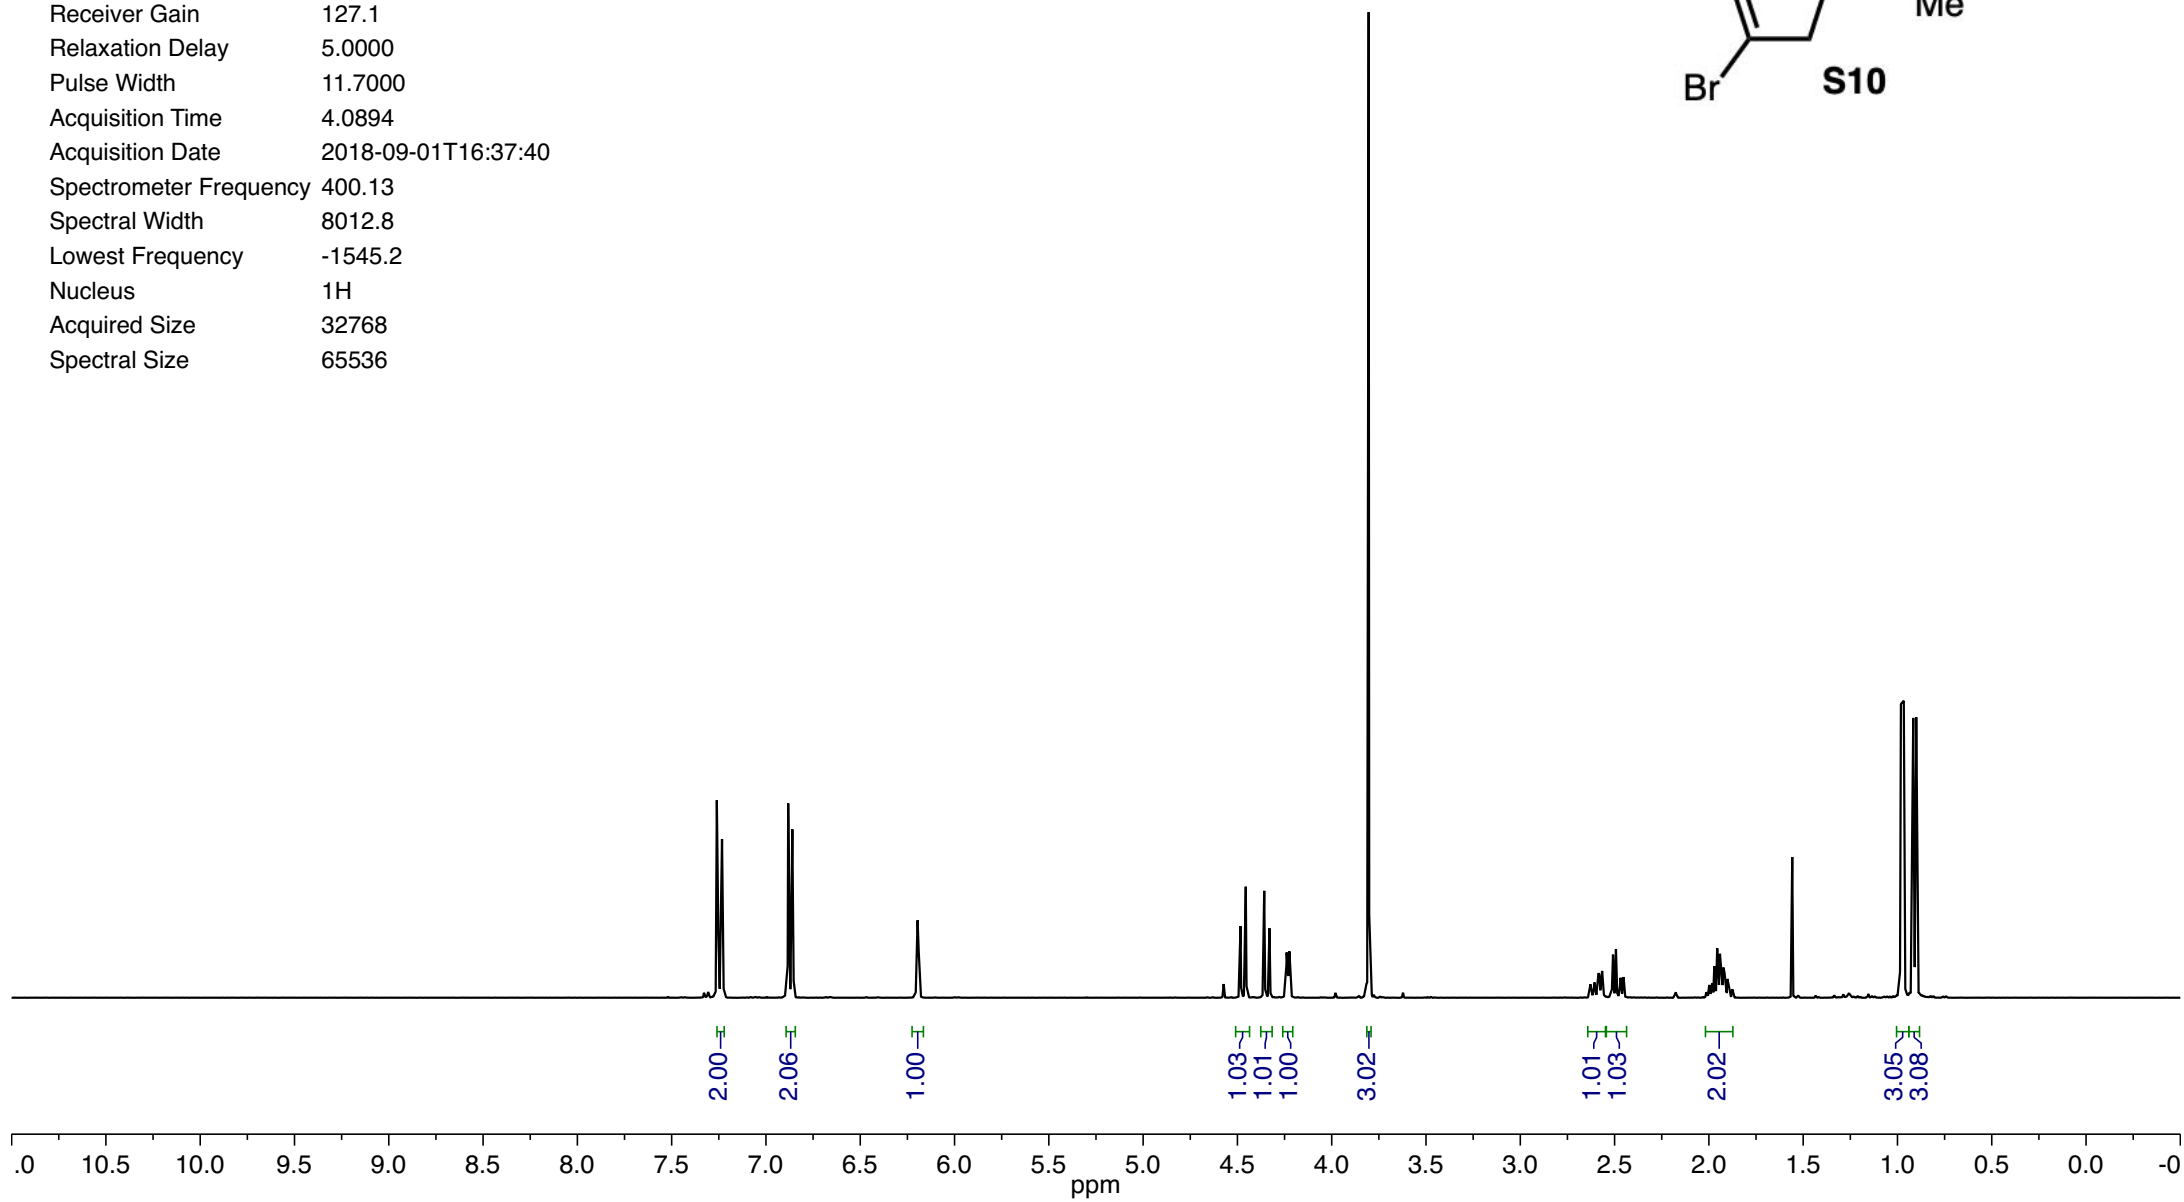



| Parameter              | Value                                       |
|------------------------|---------------------------------------------|
| Data File Name         | /Volumes/nmrdata/ahan/nmr/9-AH-079-P/7/ fid |
| Title                  | 9-AH-079-P.7.fid                            |
| Origin                 | Bruker BioSpin GmbH                         |
| Solvent                | CDCl3                                       |
| Temperature            | 295.1                                       |
| Pulse Sequence         | zgpg30                                      |
| Number of Scans        | 59                                          |
| Receiver Gain          | 72.0                                        |
| Relaxation Delay       | 1.0000                                      |
| Pulse Width            | 10.0000                                     |
| Acquisition Time       | 1.3631                                      |
| Acquisition Date       | 2018-09-01T16:40:35                         |
| Spectrometer Frequency | 100.62                                      |
| Spectral Width         | 24038.5                                     |
| Lowest Frequency       | -1961.8                                     |
| Nucleus                | <sup>13</sup> C                             |
| Acquired Size          | 32768                                       |
| Spectral Size          | 65536                                       |

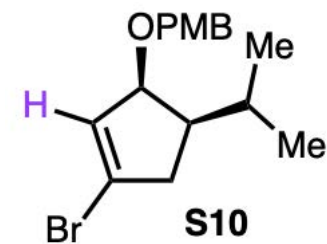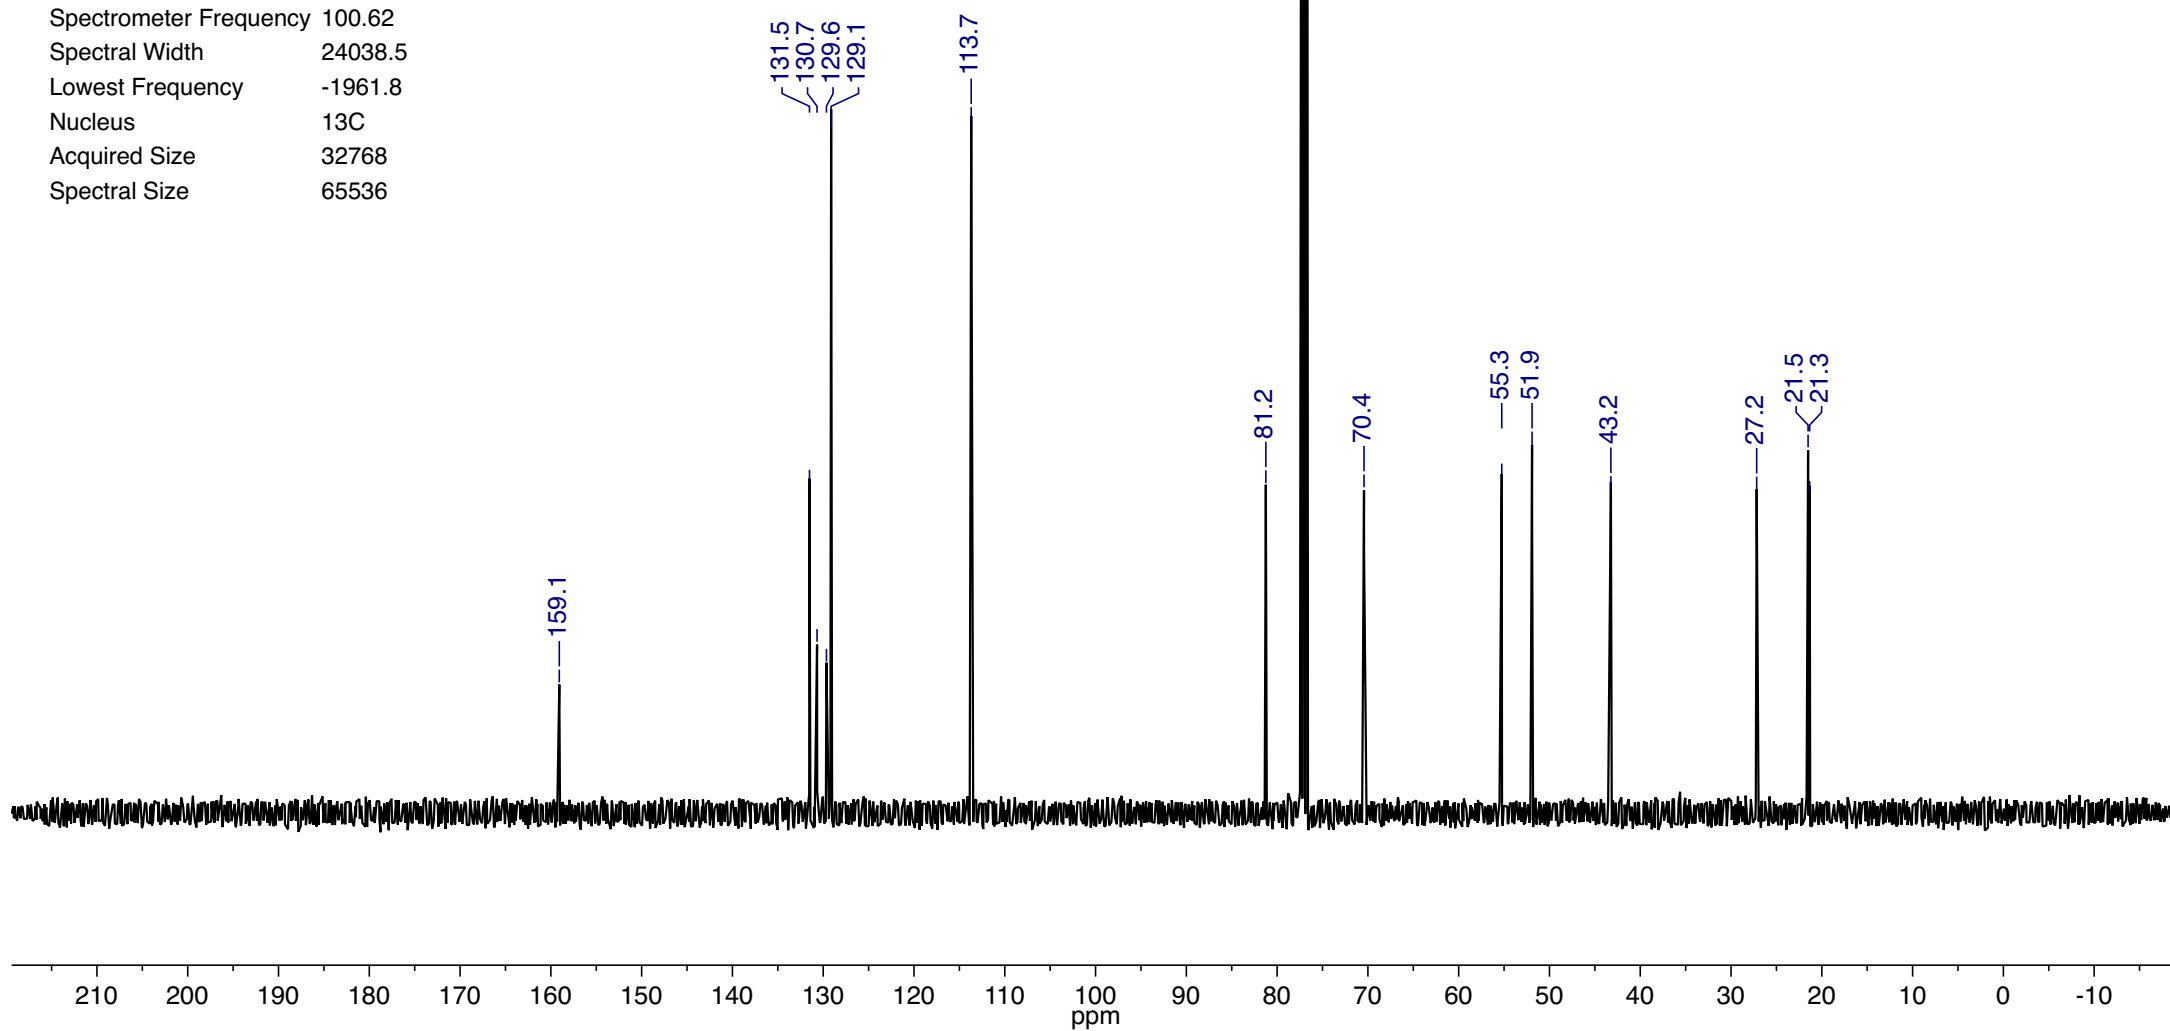

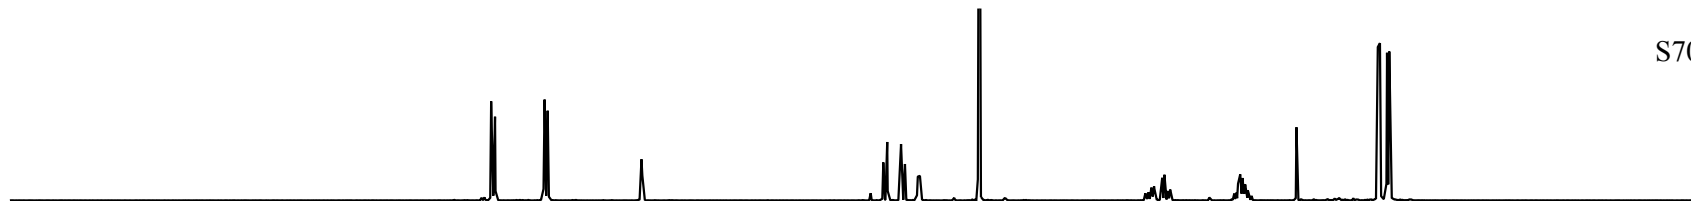

| Parameter              | Value                                             |
|------------------------|---------------------------------------------------|
| Data File Name         | / Volumes/ nmrdata/ ahan/ nmr/ 9-AH-079-P/ 4/ ser |
| Title                  | 9-AH-079-P.4.ser                                  |
| Origin                 | Bruker BioSpin GmbH                               |
| Solvent                | CDCl <sub>3</sub>                                 |
| Temperature            | 295.2                                             |
| Pulse Sequence         | hsqcetdgpsisp2.4                                  |
| Number of Scans        | 4                                                 |
| Receiver Gain          | 197.4                                             |
| Relaxation Delay       | 1.0000                                            |
| Pulse Width            | 11.7000                                           |
| Acquisition Time       | 0.2135                                            |
| Acquisition Date       | 2018-09-01T16:42:32                               |
| Spectrometer Frequency | (400.13, 100.62)                                  |
| Spectral Width         | (4795.4, 16611.3)                                 |
| Lowest Frequency       | (-517.1, -1262.8)                                 |
| Nucleus                | ( <sup>1</sup> H, <sup>13</sup> C)                |
| Acquired Size          | (1024, 180)                                       |
| Spectral Size          | (1024, 1024)                                      |

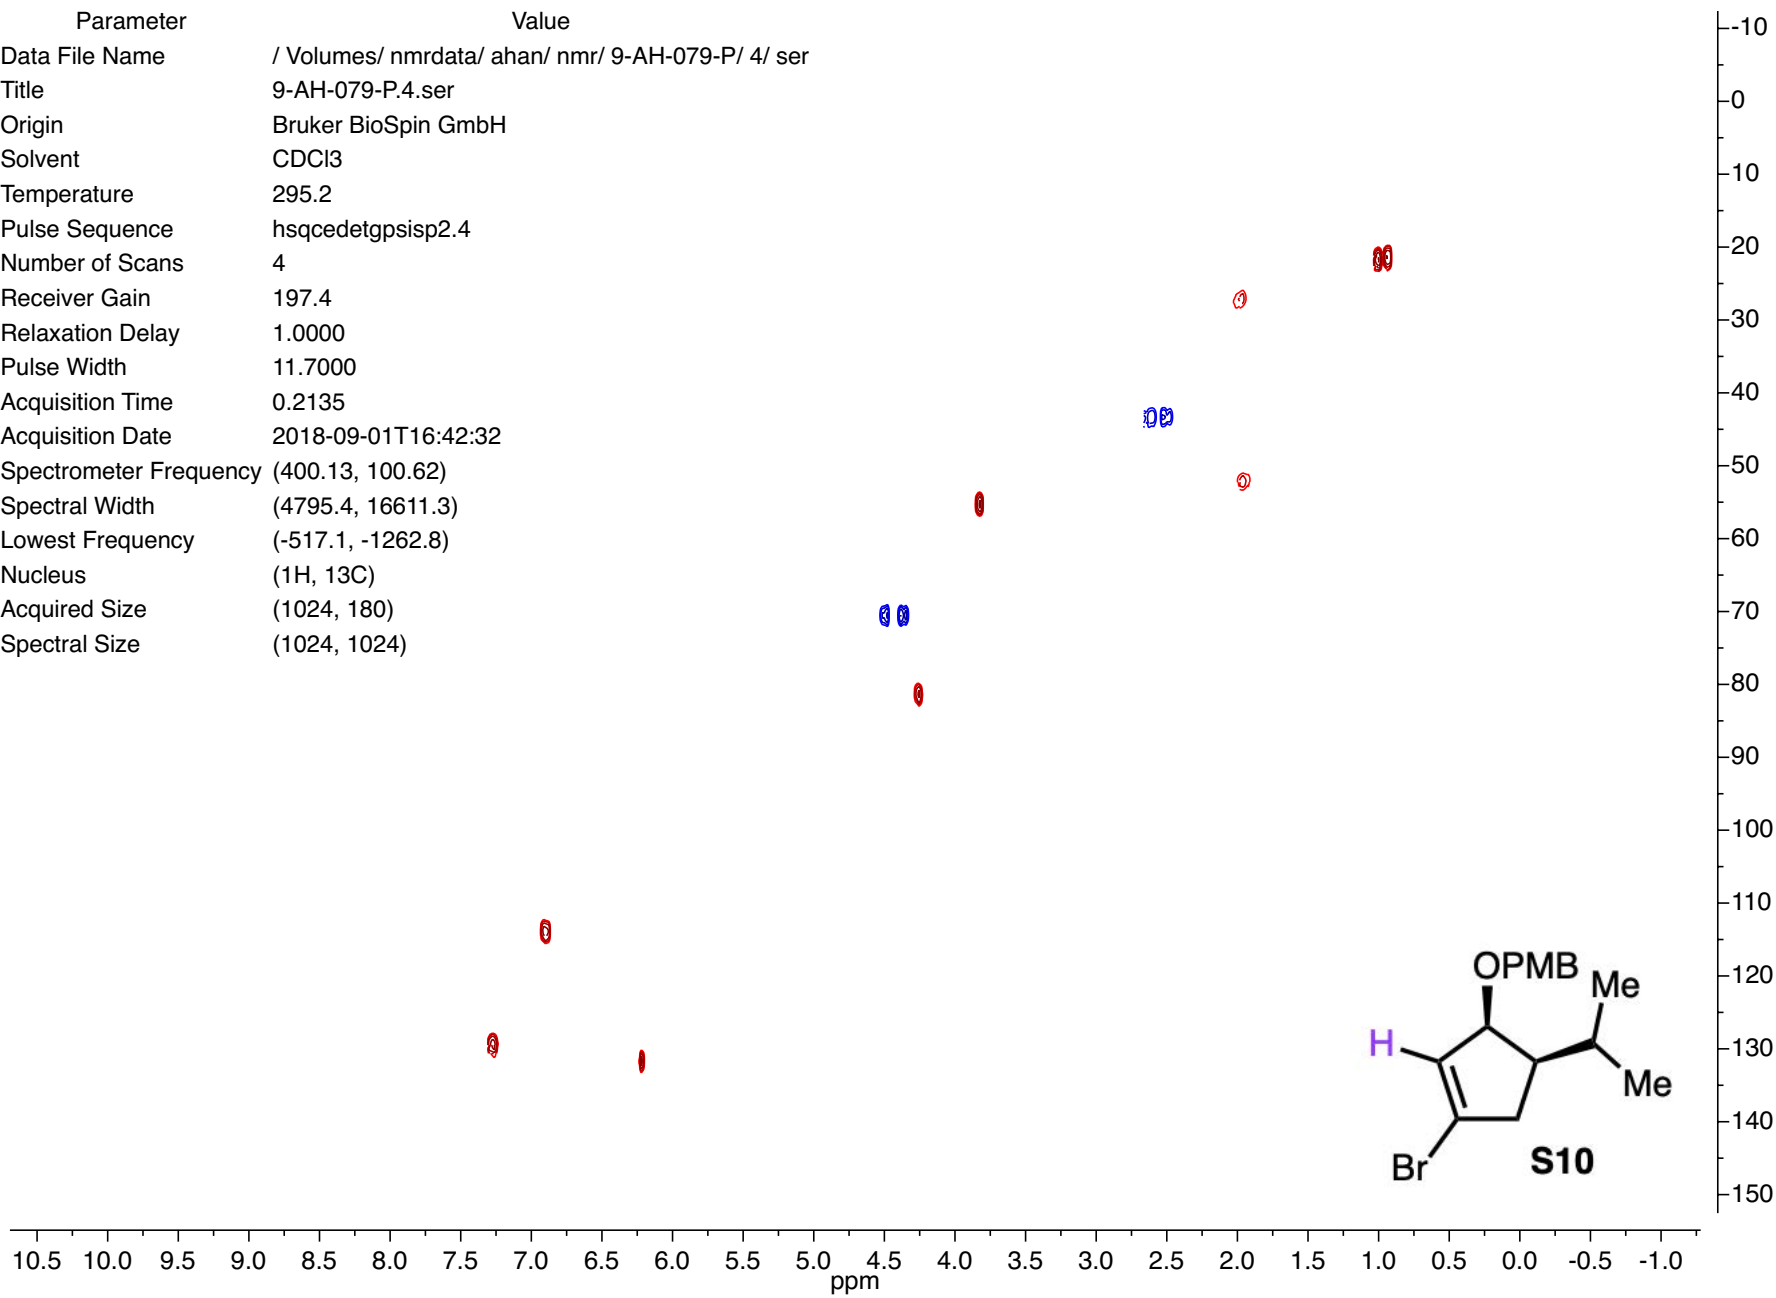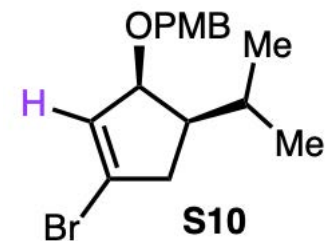

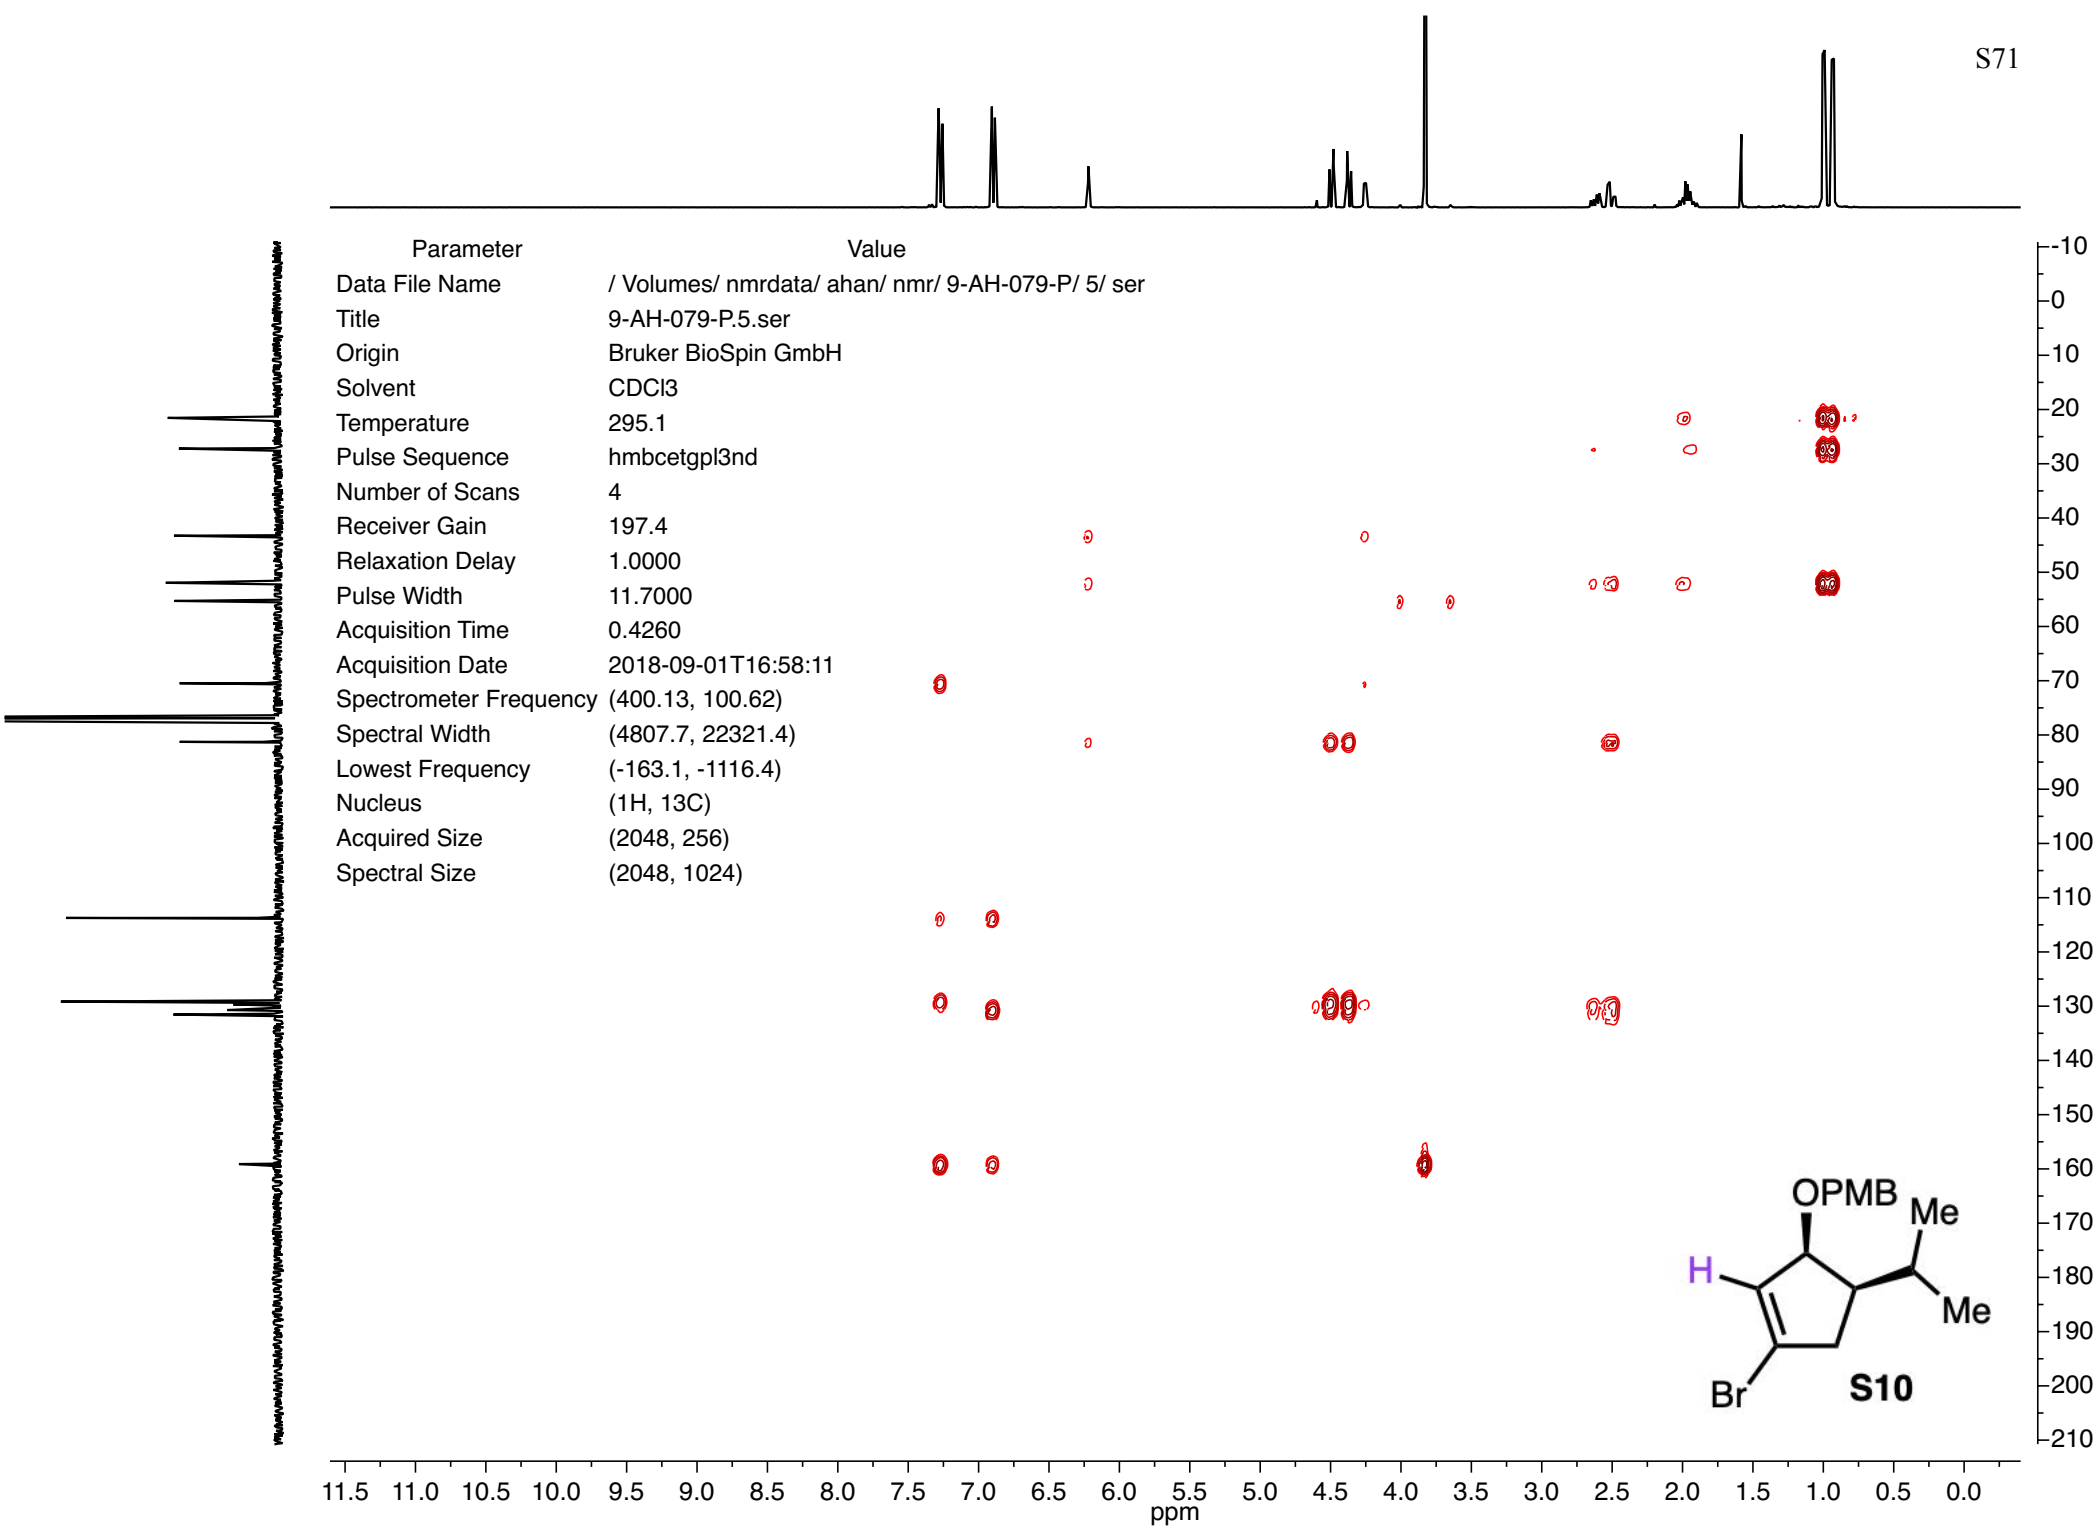

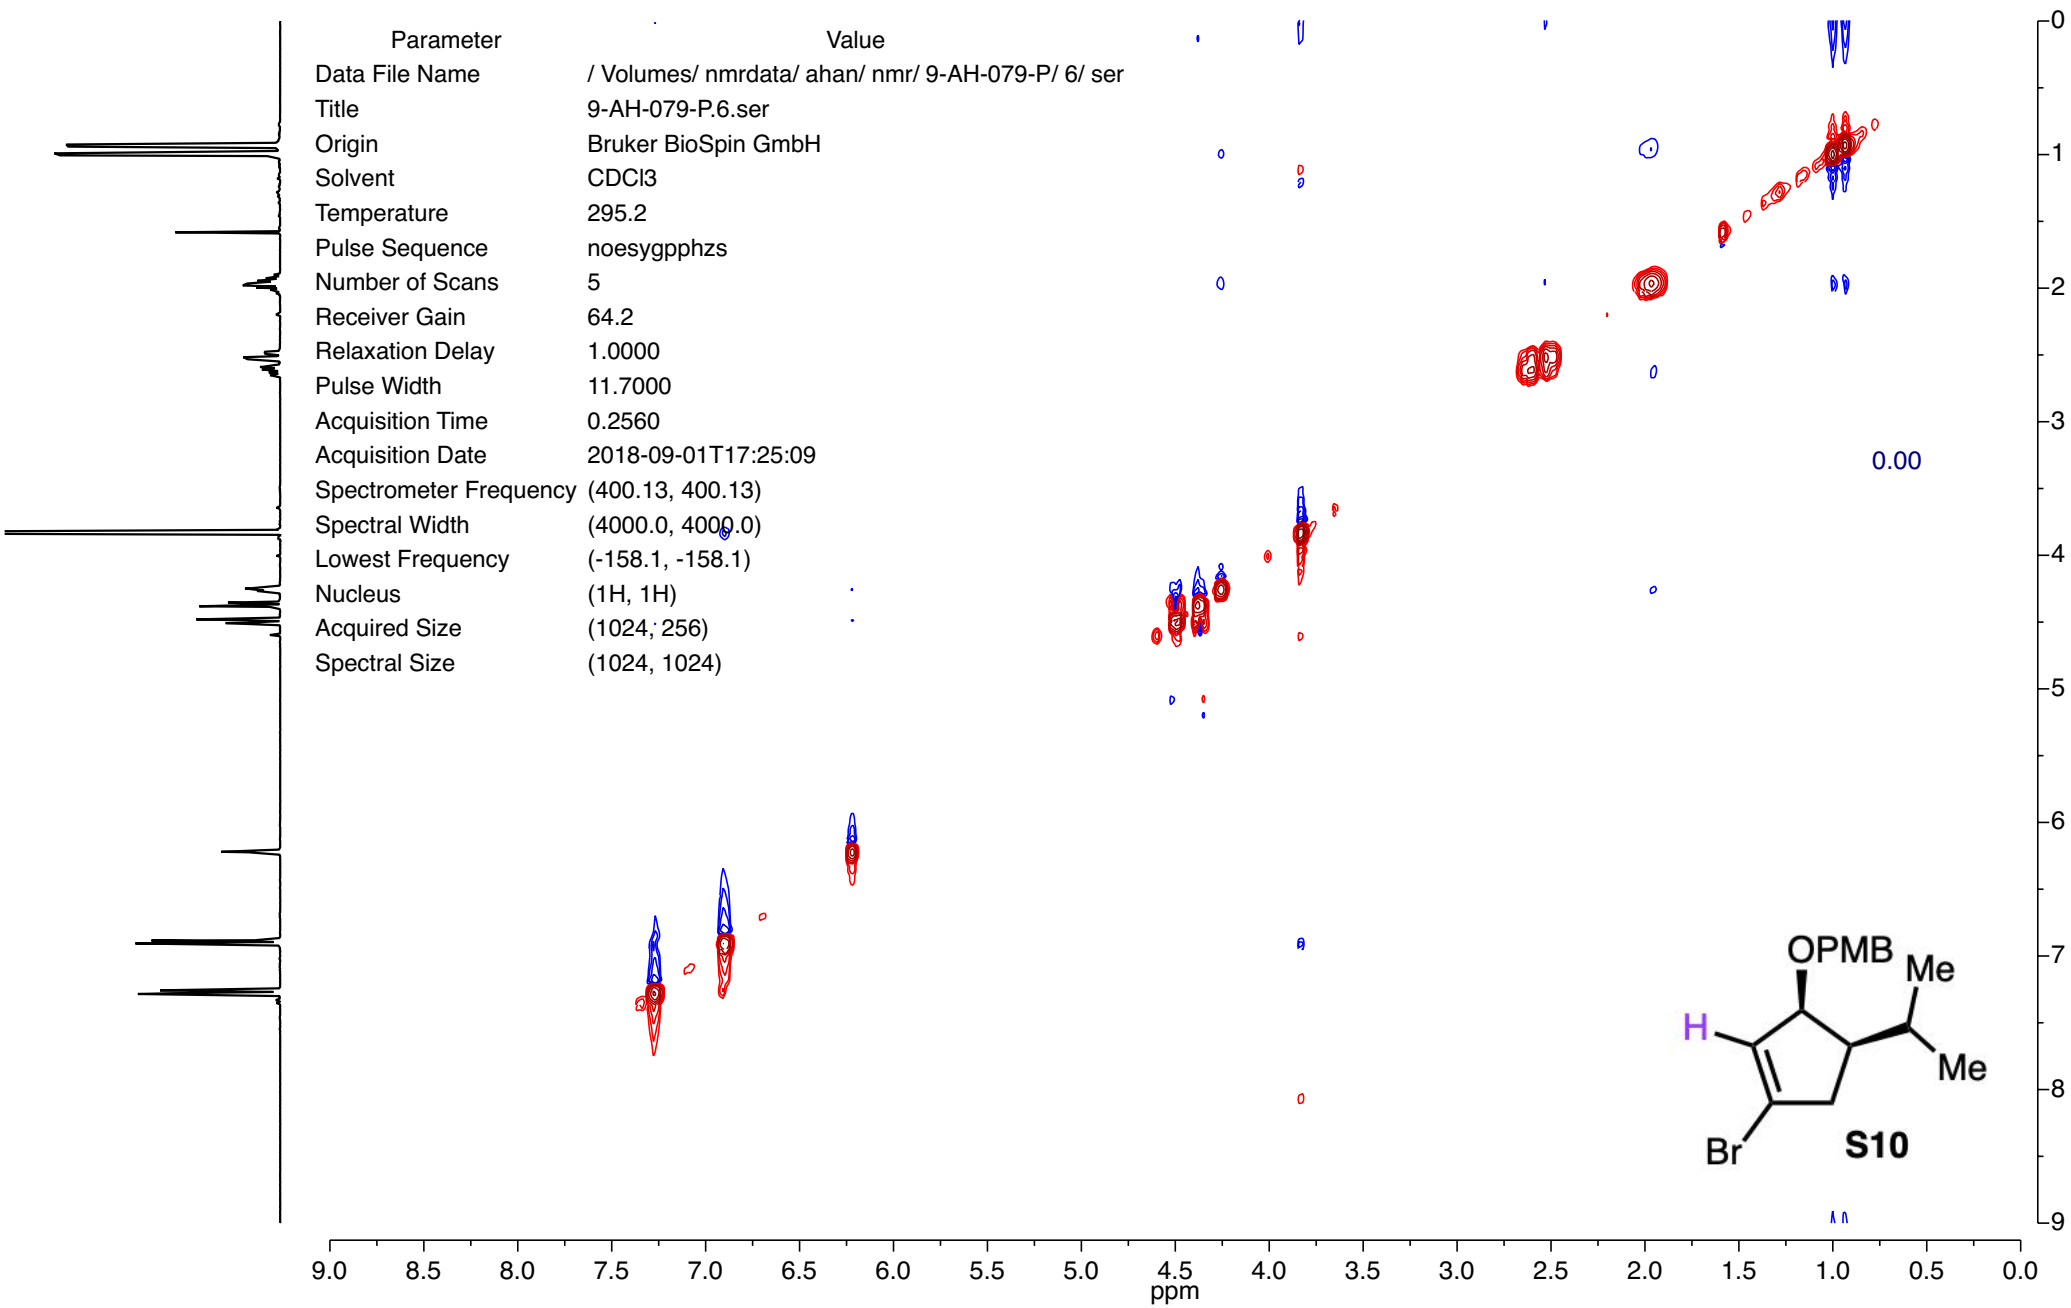

| Parameter              | Value                                       |
|------------------------|---------------------------------------------|
| Data File Name         | /Volumes/nmrdata/ahan/nmr/9-AH-083-CH/1/fid |
| Title                  | 9-AH-083-CH.1.fid                           |
| Origin                 | Bruker BioSpin GmbH                         |
| Solvent                | CDCl3                                       |
| Temperature            | 295.2                                       |
| Pulse Sequence         | zg30                                        |
| Number of Scans        | 1                                           |
| Receiver Gain          | 142.8                                       |
| Relaxation Delay       | 5.0000                                      |
| Pulse Width            | 11.7000                                     |
| Acquisition Time       | 4.0894                                      |
| Acquisition Date       | 2018-09-04T06:31:21                         |
| Spectrometer Frequency | 400.13                                      |
| Spectral Width         | 8012.8                                      |
| Lowest Frequency       | -1545.4                                     |
| Nucleus                | 1H                                          |
| Acquired Size          | 32768                                       |
| Spectral Size          | 65536                                       |

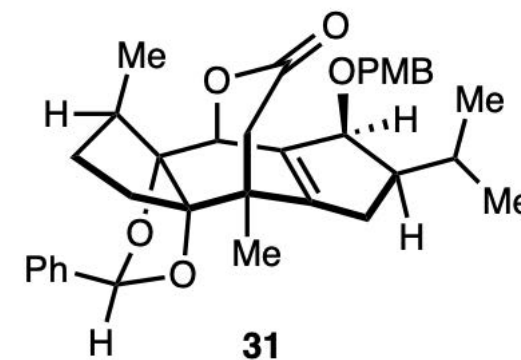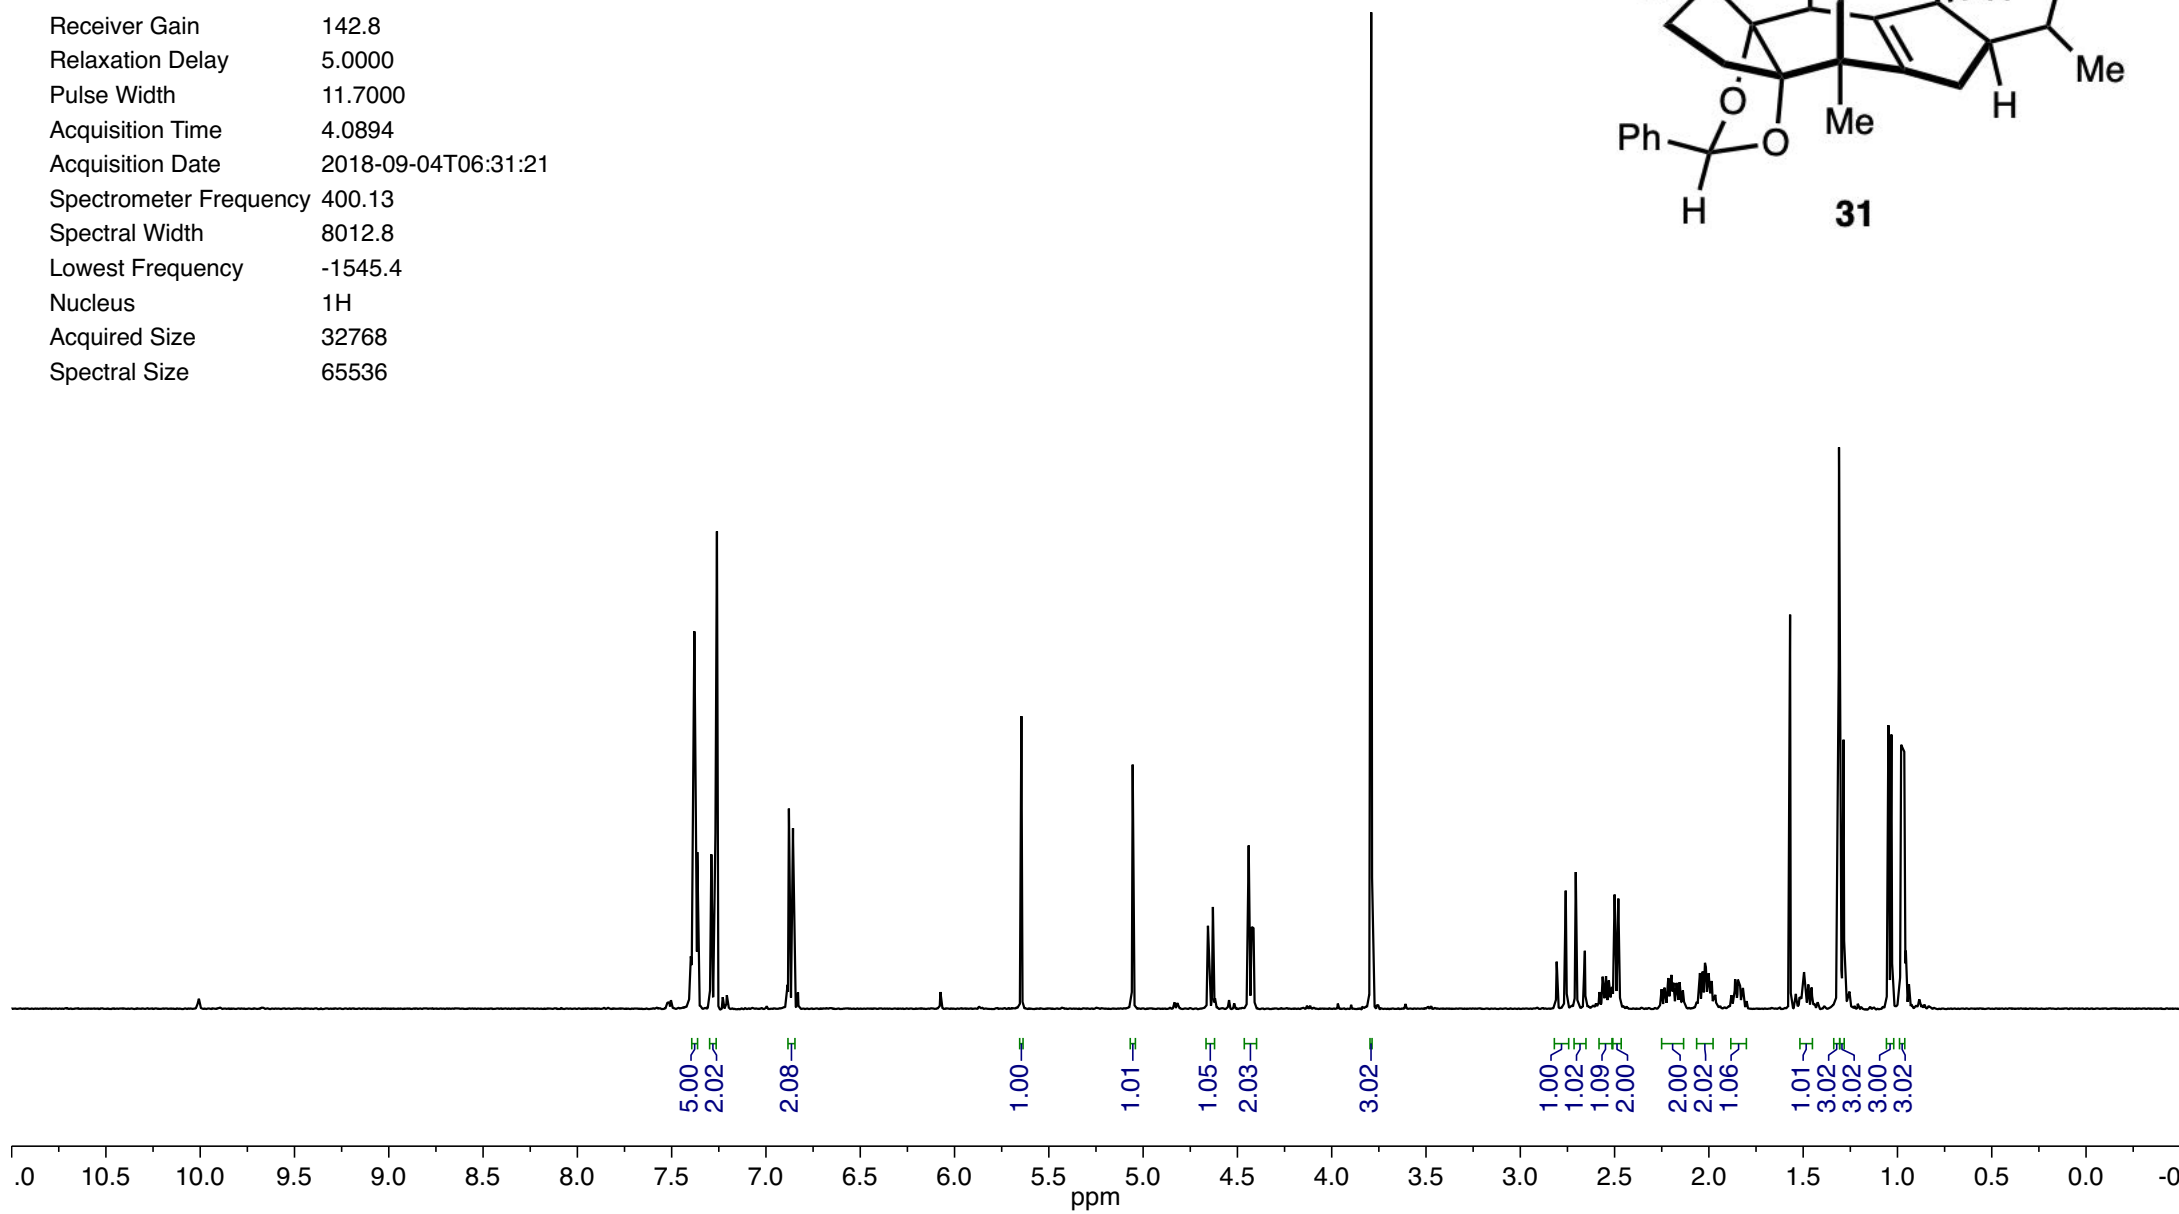

| Parameter              | Value                                         |
|------------------------|-----------------------------------------------|
| Data File Name         | /Volumes/nmrdata/ahan/nmr/9-AH-083-CH/ 2/ fid |
| Title                  | 9-AH-083-CH.2.fid                             |
| Origin                 | Bruker BioSpin GmbH                           |
| Solvent                | CDCl3                                         |
| Temperature            | 295.2                                         |
| Pulse Sequence         | zgpg30                                        |
| Number of Scans        | 750                                           |
| Receiver Gain          | 72.0                                          |
| Relaxation Delay       | 1.0000                                        |
| Pulse Width            | 10.0000                                       |
| Acquisition Time       | 1.3631                                        |
| Acquisition Date       | 2018-09-04T07:02:56                           |
| Spectrometer Frequency | 100.62                                        |
| Spectral Width         | 24038.5                                       |
| Lowest Frequency       | -1961.8                                       |
| Nucleus                | <sup>13</sup> C                               |
| Acquired Size          | 32768                                         |
| Spectral Size          | 65536                                         |

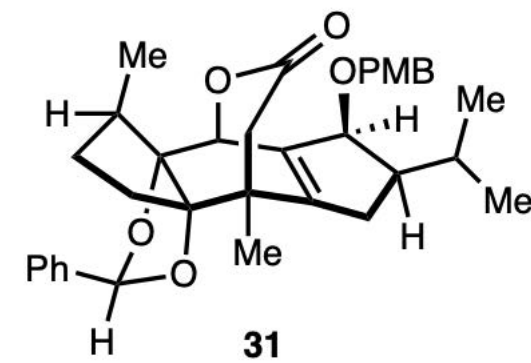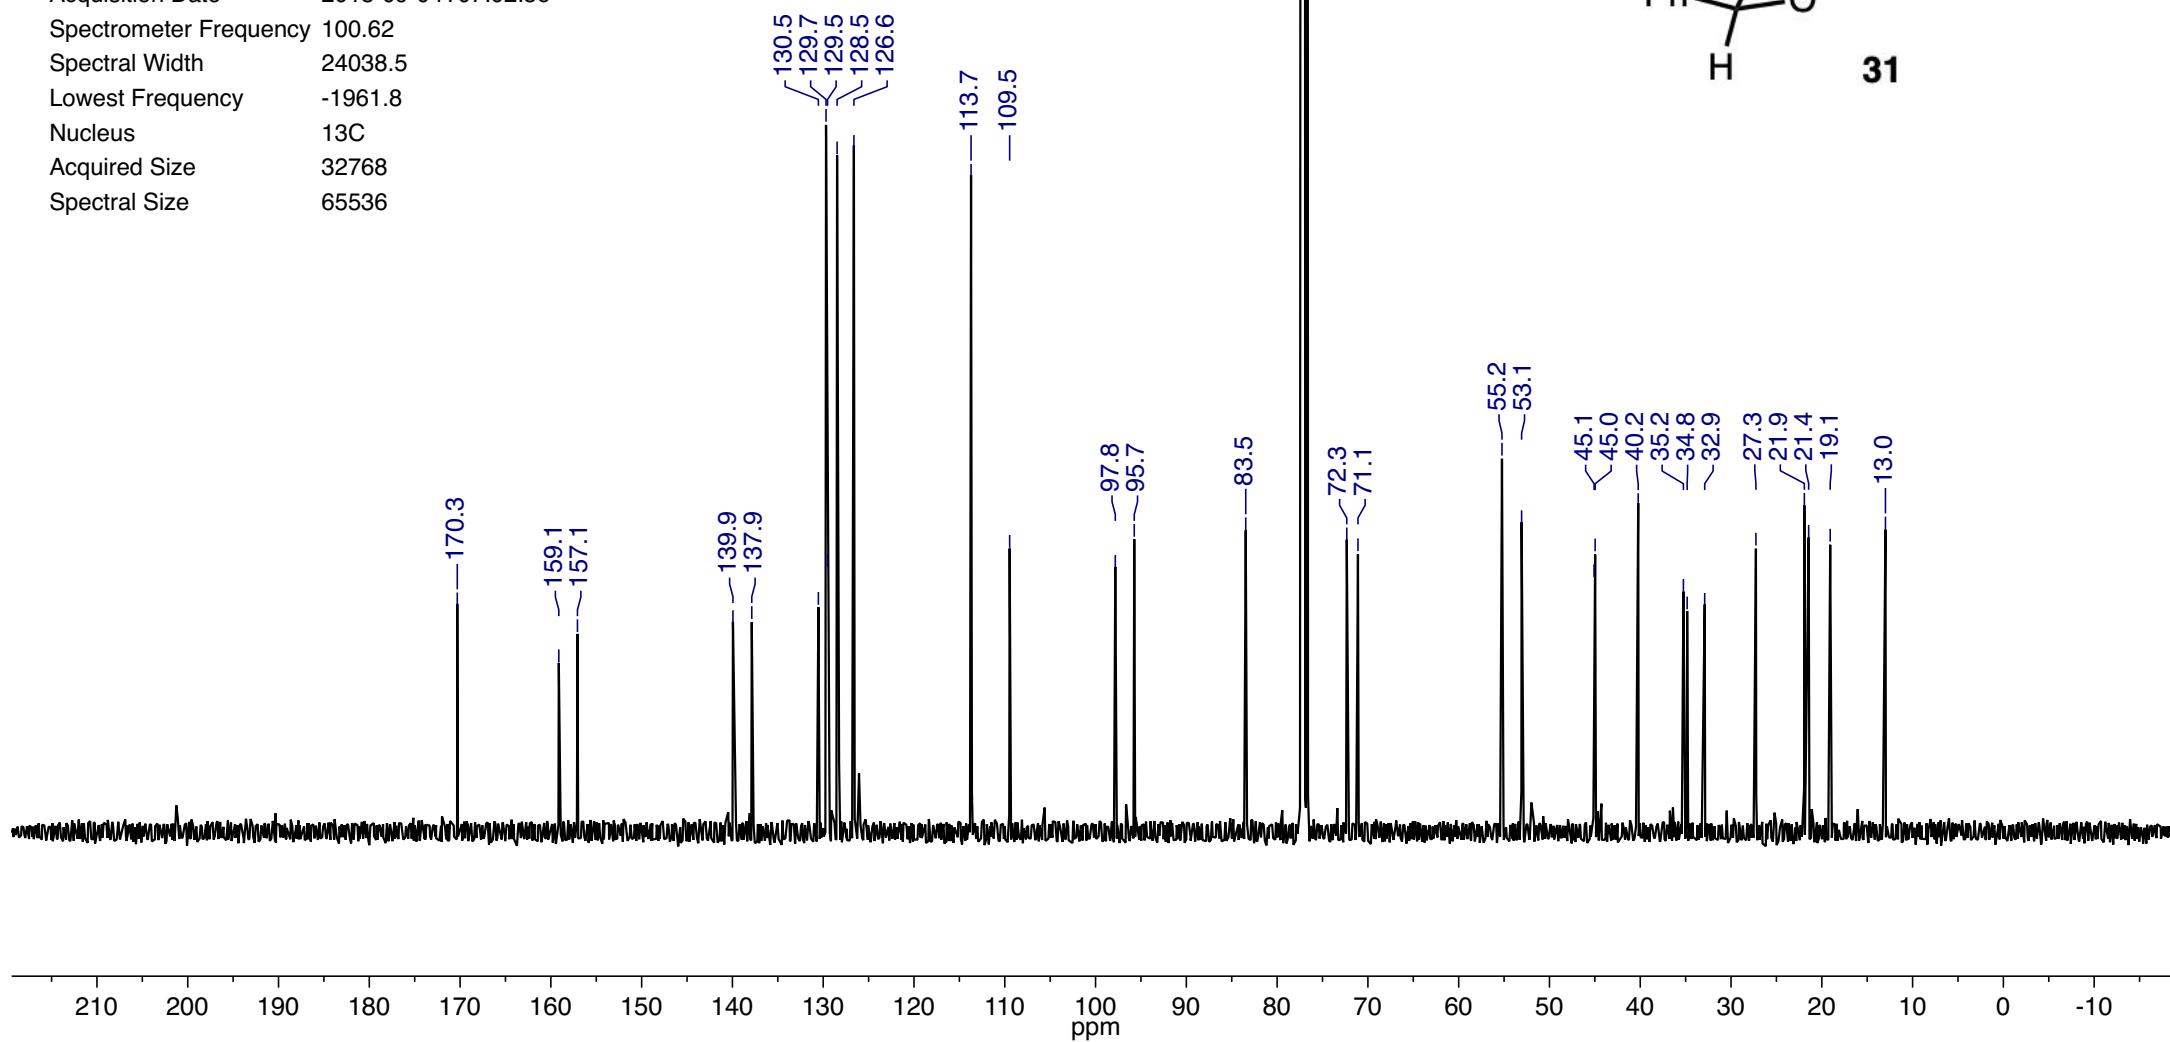

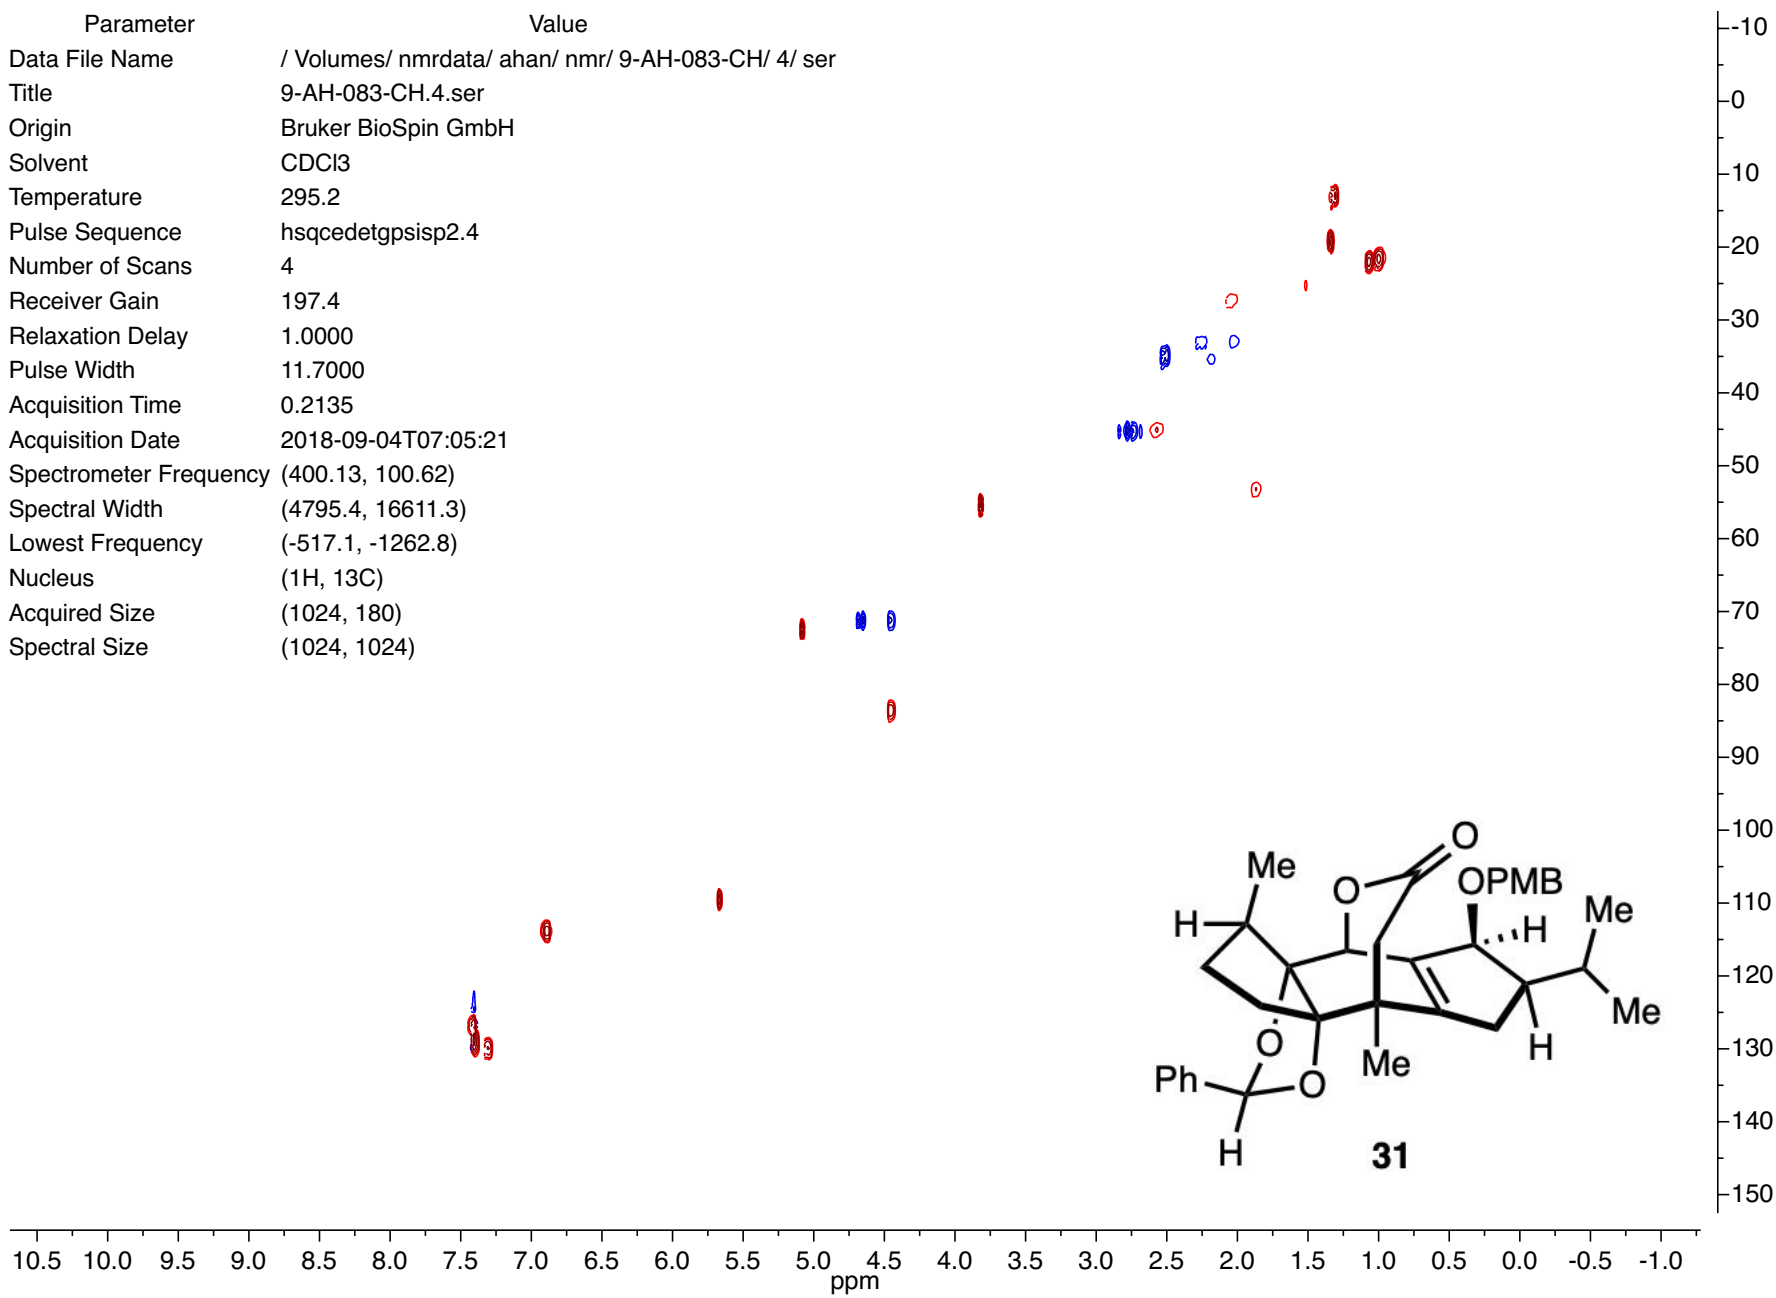

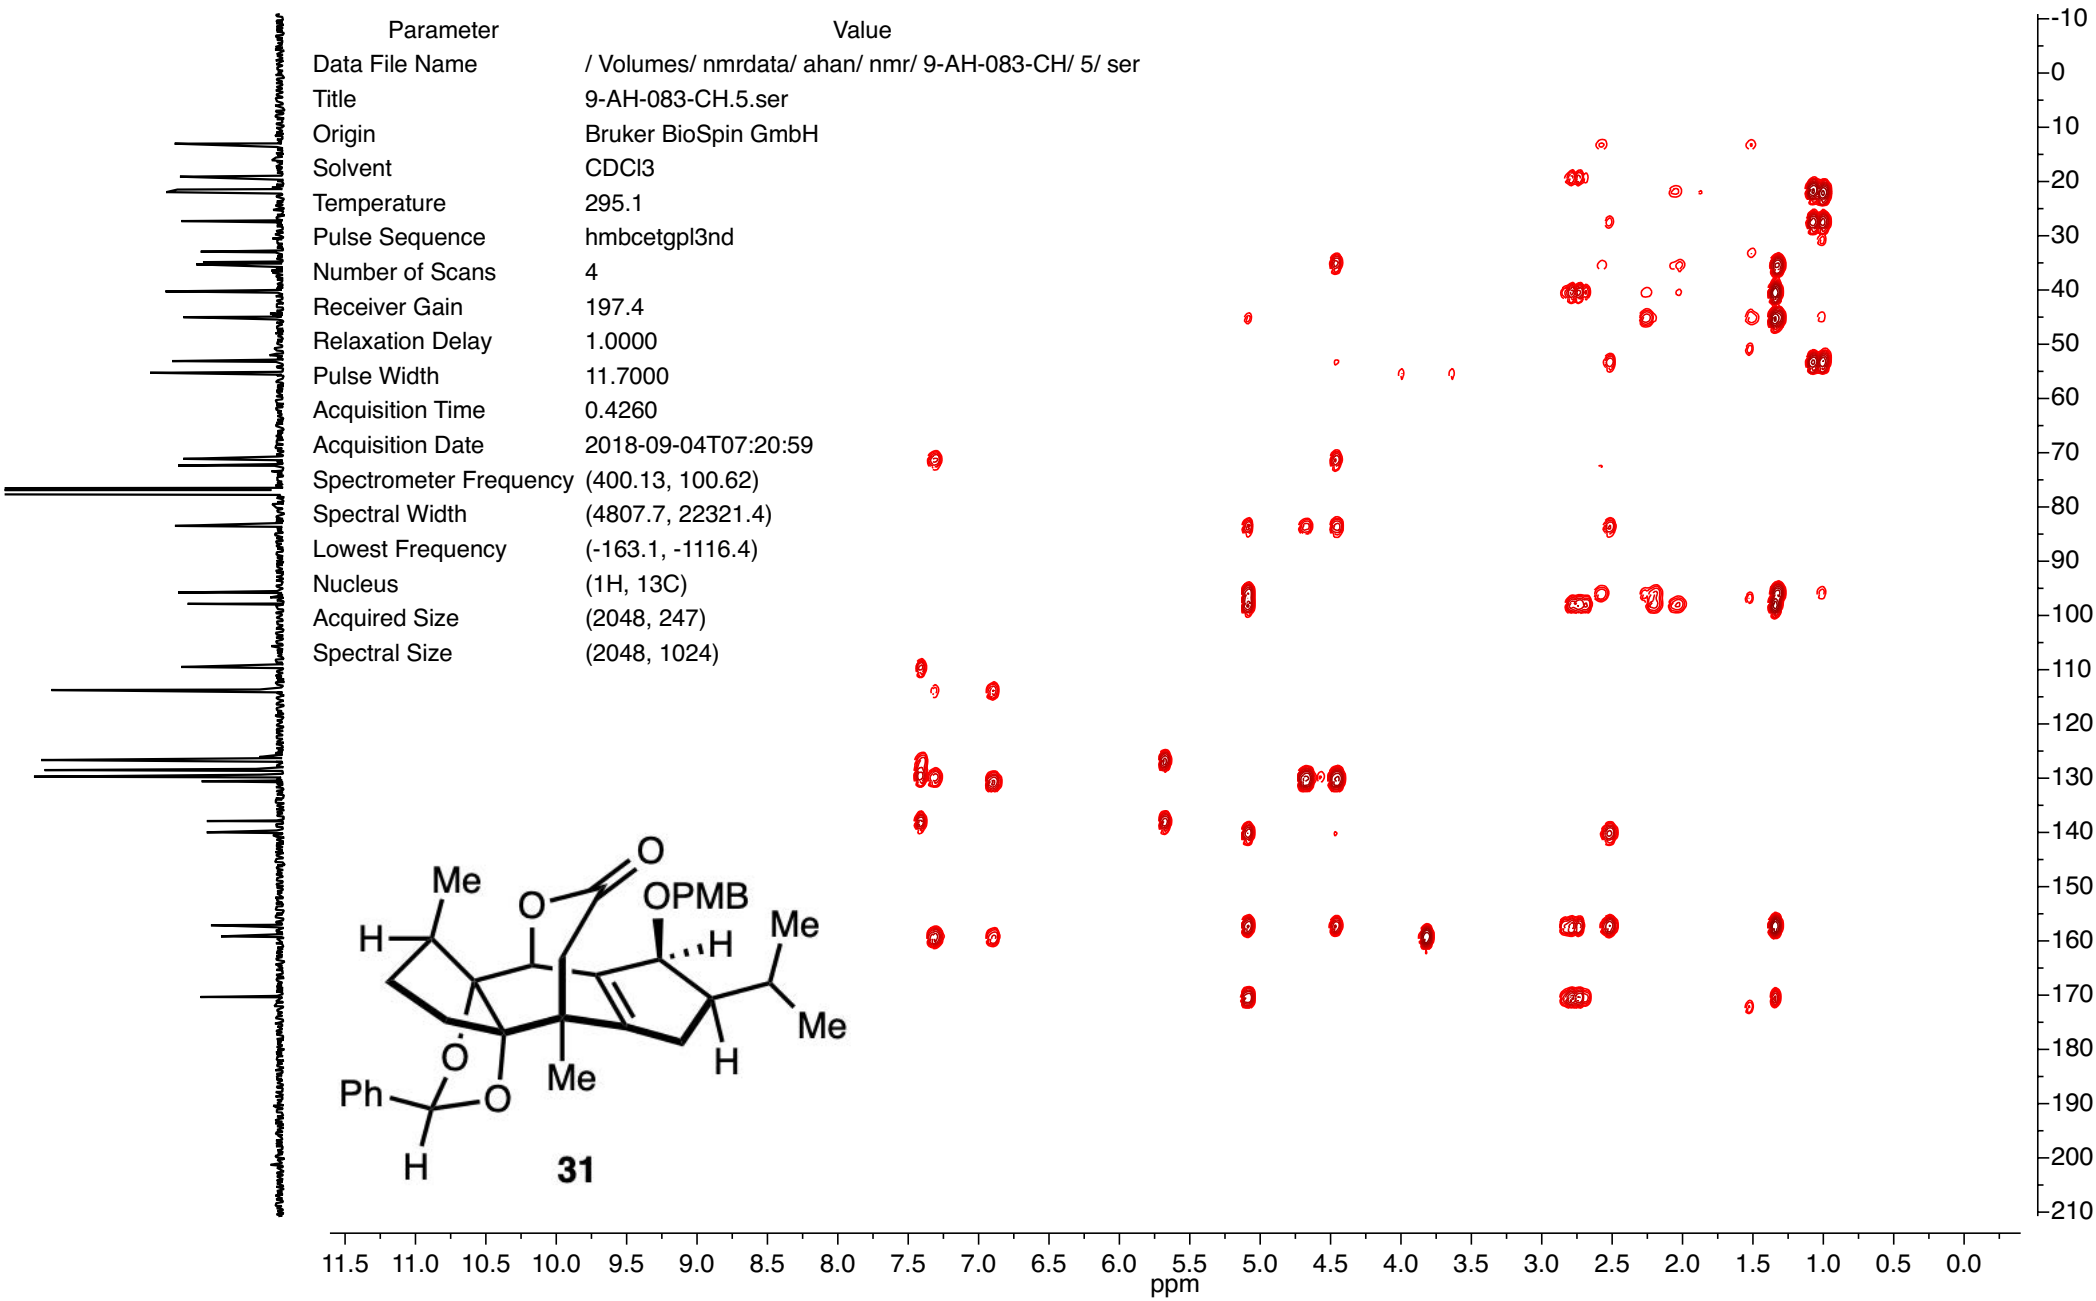



| Parameter              | Value                                         |
|------------------------|-----------------------------------------------|
| Data File Name         | /Volumes/nmrdata/ytao/nmr/1-YT-168CHAR3/1/fid |
| Title                  | 1-YT-168CHAR3.1.fid                           |
| Origin                 | Bruker BioSpin GmbH                           |
| Solvent                | CDCl3                                         |
| Temperature            | 295.1                                         |
| Pulse Sequence         | zg30                                          |
| Number of Scans        | 16                                            |
| Receiver Gain          | 142.8                                         |
| Relaxation Delay       | 1.0000                                        |
| Pulse Width            | 11.7000                                       |
| Acquisition Time       | 4.0894                                        |
| Acquisition Date       | 2018-12-07T20:47:49                           |
| Spectrometer Frequency | 400.13                                        |
| Spectral Width         | 8012.8                                        |
| Lowest Frequency       | -1545.6                                       |
| Nucleus                | 1H                                            |
| Acquired Size          | 32768                                         |
| Spectral Size          | 65536                                         |

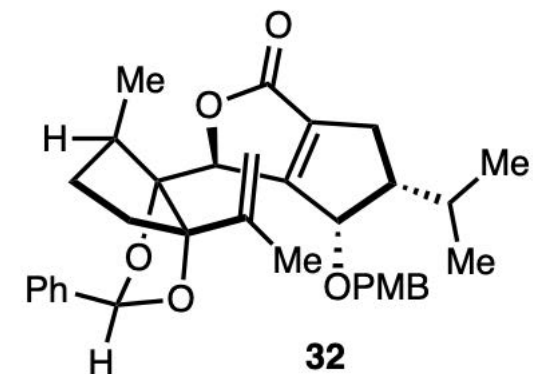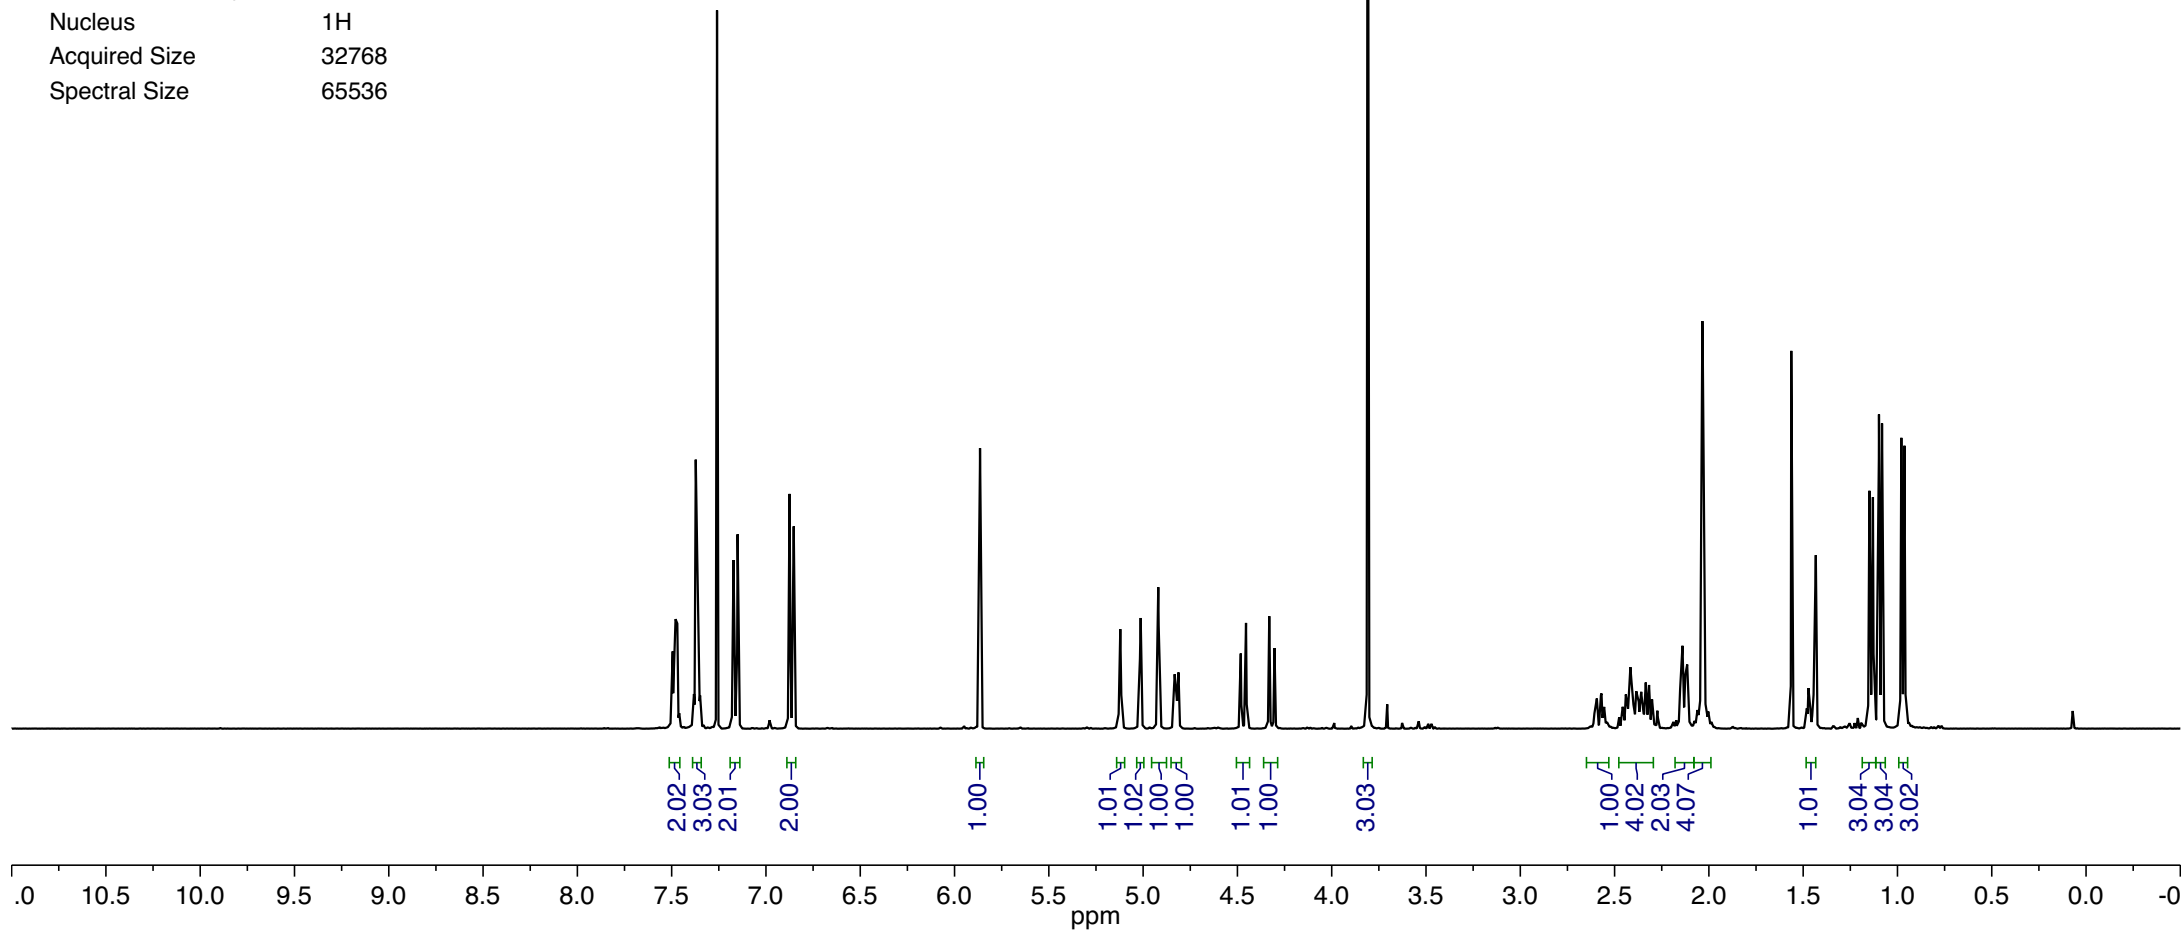

| Parameter              | Value                                          |
|------------------------|------------------------------------------------|
| Data File Name         | /Volumes/nmrdata/ytao/nmr/1-YT-168CHAR3/2/ fid |
| Title                  | 1-YT-168CHAR3.2.fid                            |
| Origin                 | Bruker BioSpin GmbH                            |
| Solvent                | CDCI3                                          |
| Temperature            | 295.1                                          |
| Pulse Sequence         | zgpg30                                         |
| Number of Scans        | 512                                            |
| Receiver Gain          | 78.7                                           |
| Relaxation Delay       | 1.0000                                         |
| Pulse Width            | 10.0000                                        |
| Acquisition Time       | 1.3631                                         |
| Acquisition Date       | 2018-12-07T21:09:02                            |
| Spectrometer Frequency | 100.62                                         |
| Spectral Width         | 24038.5                                        |
| Lowest Frequency       | -1961.7                                        |
| Nucleus                | <sup>13</sup> C                                |
| Acquired Size          | 32768                                          |
| Spectral Size          | 65536                                          |

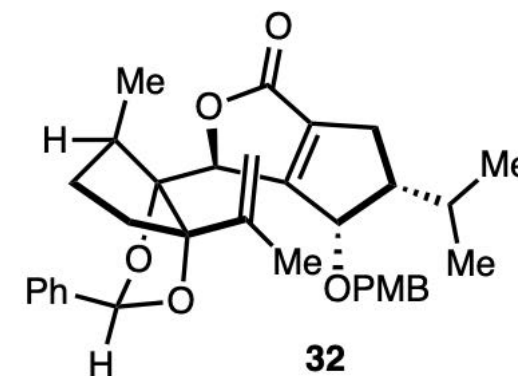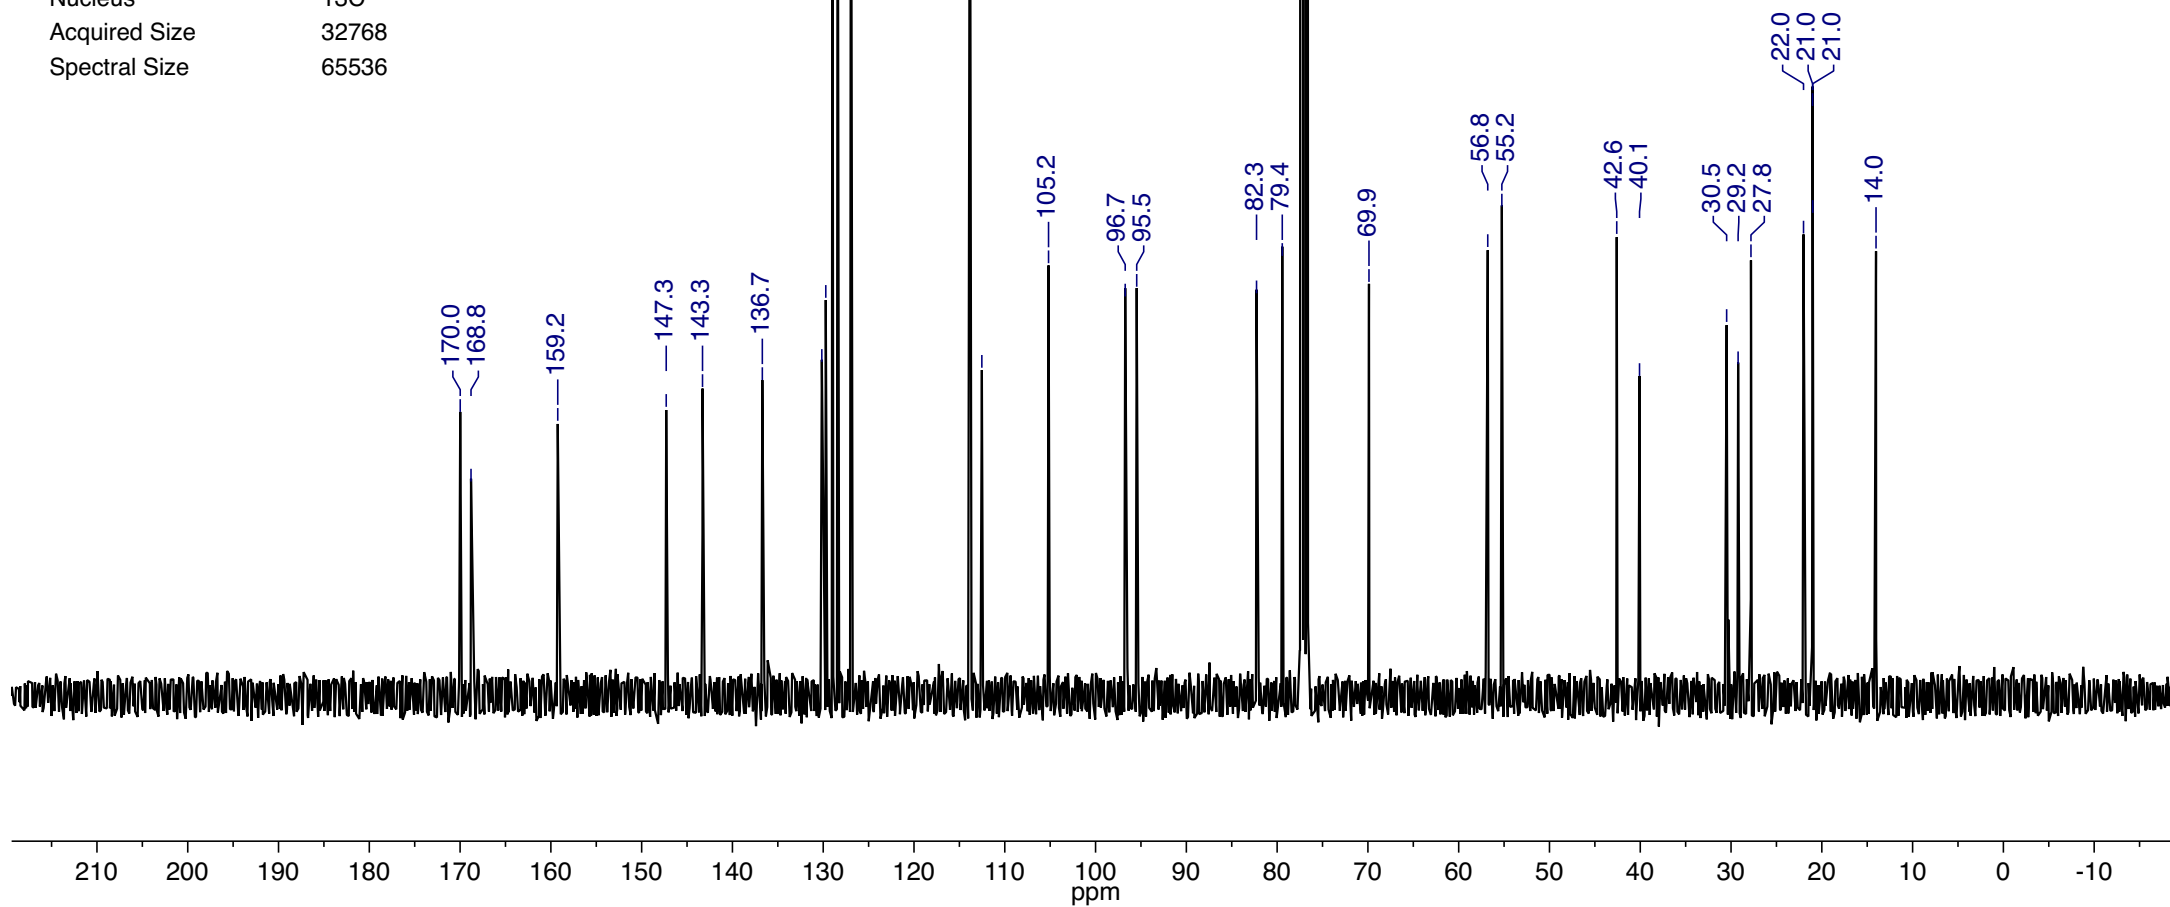

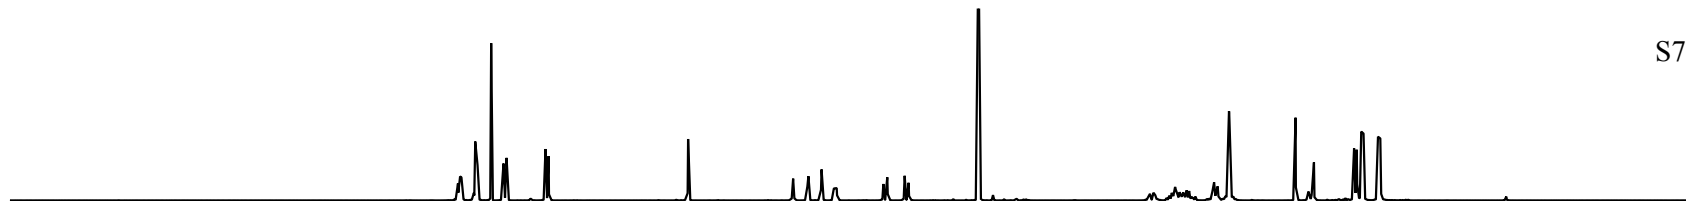

| Parameter              | Value                                                |
|------------------------|------------------------------------------------------|
| Data File Name         | / Volumes/ nmrdata/ ytao/ nmr/ 1-YT-168CHAR3/ 4/ ser |
| Title                  | 1-YT-168CHAR3.4.ser                                  |
| Origin                 | Bruker BioSpin GmbH                                  |
| Solvent                | CDCI3                                                |
| Temperature            | 295.1                                                |
| Pulse Sequence         | hsqcetdgpsisp2.4                                     |
| Number of Scans        | 2                                                    |
| Receiver Gain          | 197.4                                                |
| Relaxation Delay       | 1.5000                                               |
| Pulse Width            | 11.7000                                              |
| Acquisition Time       | 0.2135                                               |
| Acquisition Date       | 2018-12-07T21:12:12                                  |
| Spectrometer Frequency | (400.13, 100.62)                                     |
| Spectral Width         | (4795.4, 16611.3)                                    |
| Lowest Frequency       | (-526.7, -1265.2)                                    |
| Nucleus                | (1H, 13C)                                            |
| Acquired Size          | (1024, 180)                                          |
| Spectral Size          | (1024, 1024)                                         |

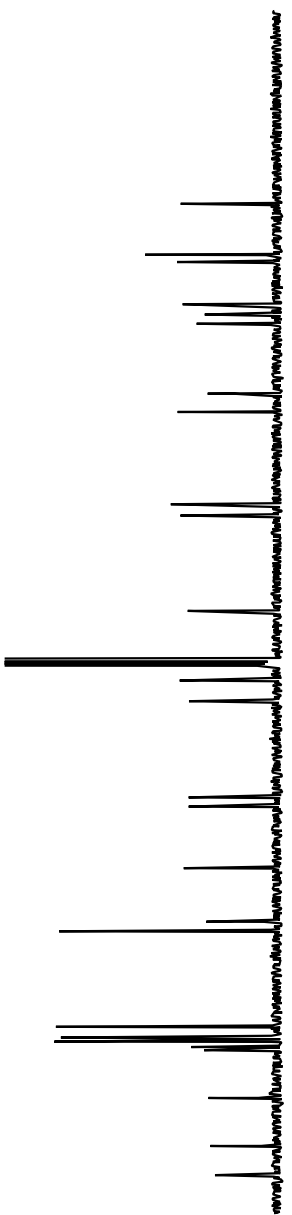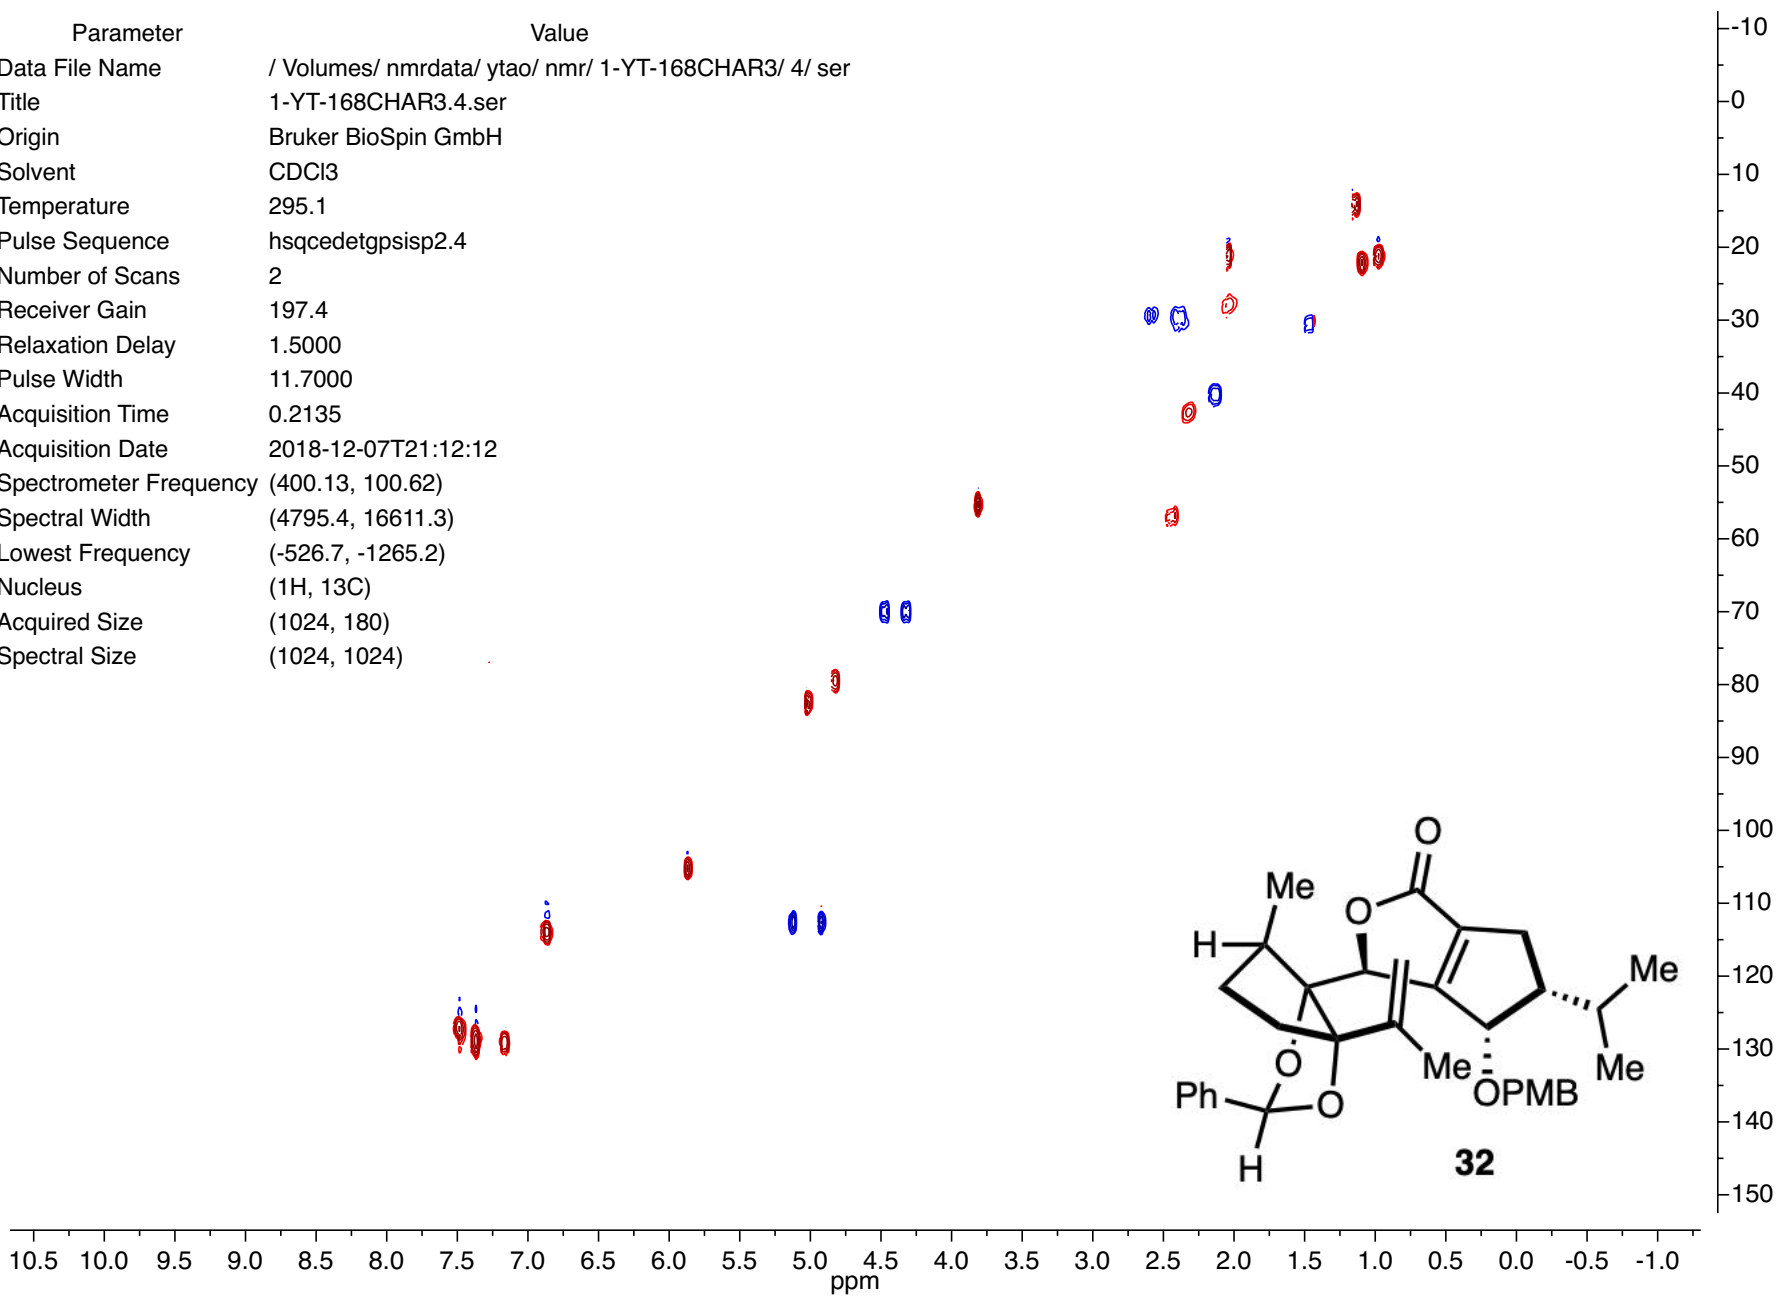

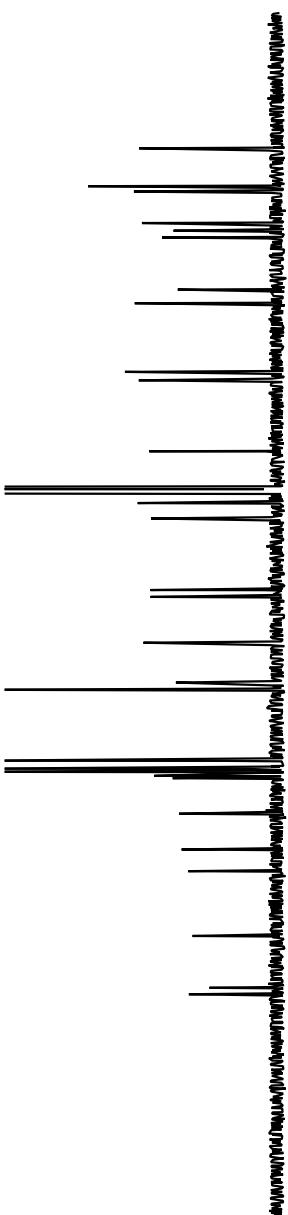

| Parameter              | Value                                                |
|------------------------|------------------------------------------------------|
| Data File Name         | / Volumes/ nmrdata/ ytao/ nmr/ 1-YT-168CHAR3/ 5/ ser |
| Title                  | 1-YT-168CHAR3.5.ser                                  |
| Origin                 | Bruker BioSpin GmbH                                  |
| Solvent                | CDCl <sub>3</sub>                                    |
| Temperature            | 295.1                                                |
| Pulse Sequence         | hmbcetgpl3nd                                         |
| Number of Scans        | 4                                                    |
| Receiver Gain          | 197.4                                                |
| Relaxation Delay       | 2.0000                                               |
| Pulse Width            | 11.7000                                              |
| Acquisition Time       | 0.4260                                               |
| Acquisition Date       | 2018-12-07T21:23:44                                  |
| Spectrometer Frequency | (400.13, 100.62)                                     |
| Spectral Width         | (4807.7, 22321.4)                                    |
| Lowest Frequency       | (-172.7, -1118.8)                                    |
| Nucleus                | ( <sup>1</sup> H, <sup>13</sup> C)                   |
| Acquired Size          | (2048, 256)                                          |
| Spectral Size          | (2048, 1024)                                         |

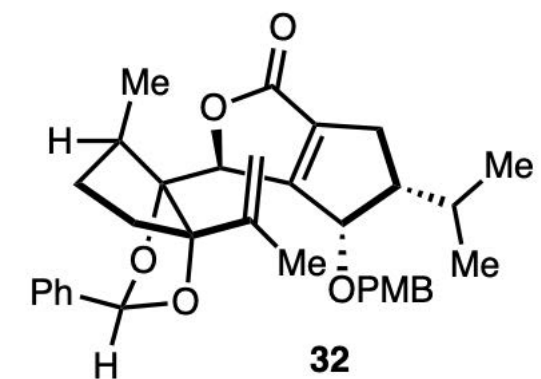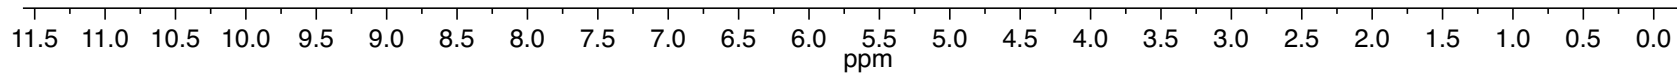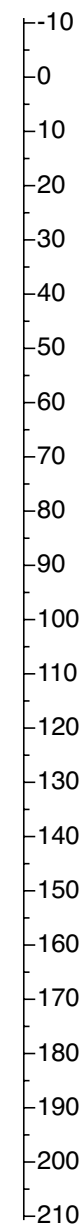

| Parameter              | Value                                         |
|------------------------|-----------------------------------------------|
| Data File Name         | /Volumes/nmrdata/ahan/nmr/9-AH-084-CH/ 1/ fid |
| Title                  | 9-AH-084-CH.1.fid                             |
| Origin                 | Bruker BioSpin GmbH                           |
| Solvent                | CDCl3                                         |
| Temperature            | 295.2                                         |
| Pulse Sequence         | zg30                                          |
| Number of Scans        | 1                                             |
| Receiver Gain          | 197.4                                         |
| Relaxation Delay       | 5.0000                                        |
| Pulse Width            | 11.7000                                       |
| Acquisition Time       | 4.0894                                        |
| Acquisition Date       | 2018-09-04T12:06:09                           |
| Spectrometer Frequency | 400.13                                        |
| Spectral Width         | 8012.8                                        |
| Lowest Frequency       | -1545.2                                       |
| Nucleus                | 1H                                            |
| Acquired Size          | 32768                                         |
| Spectral Size          | 65536                                         |

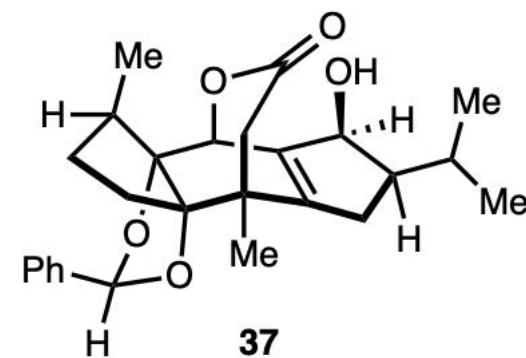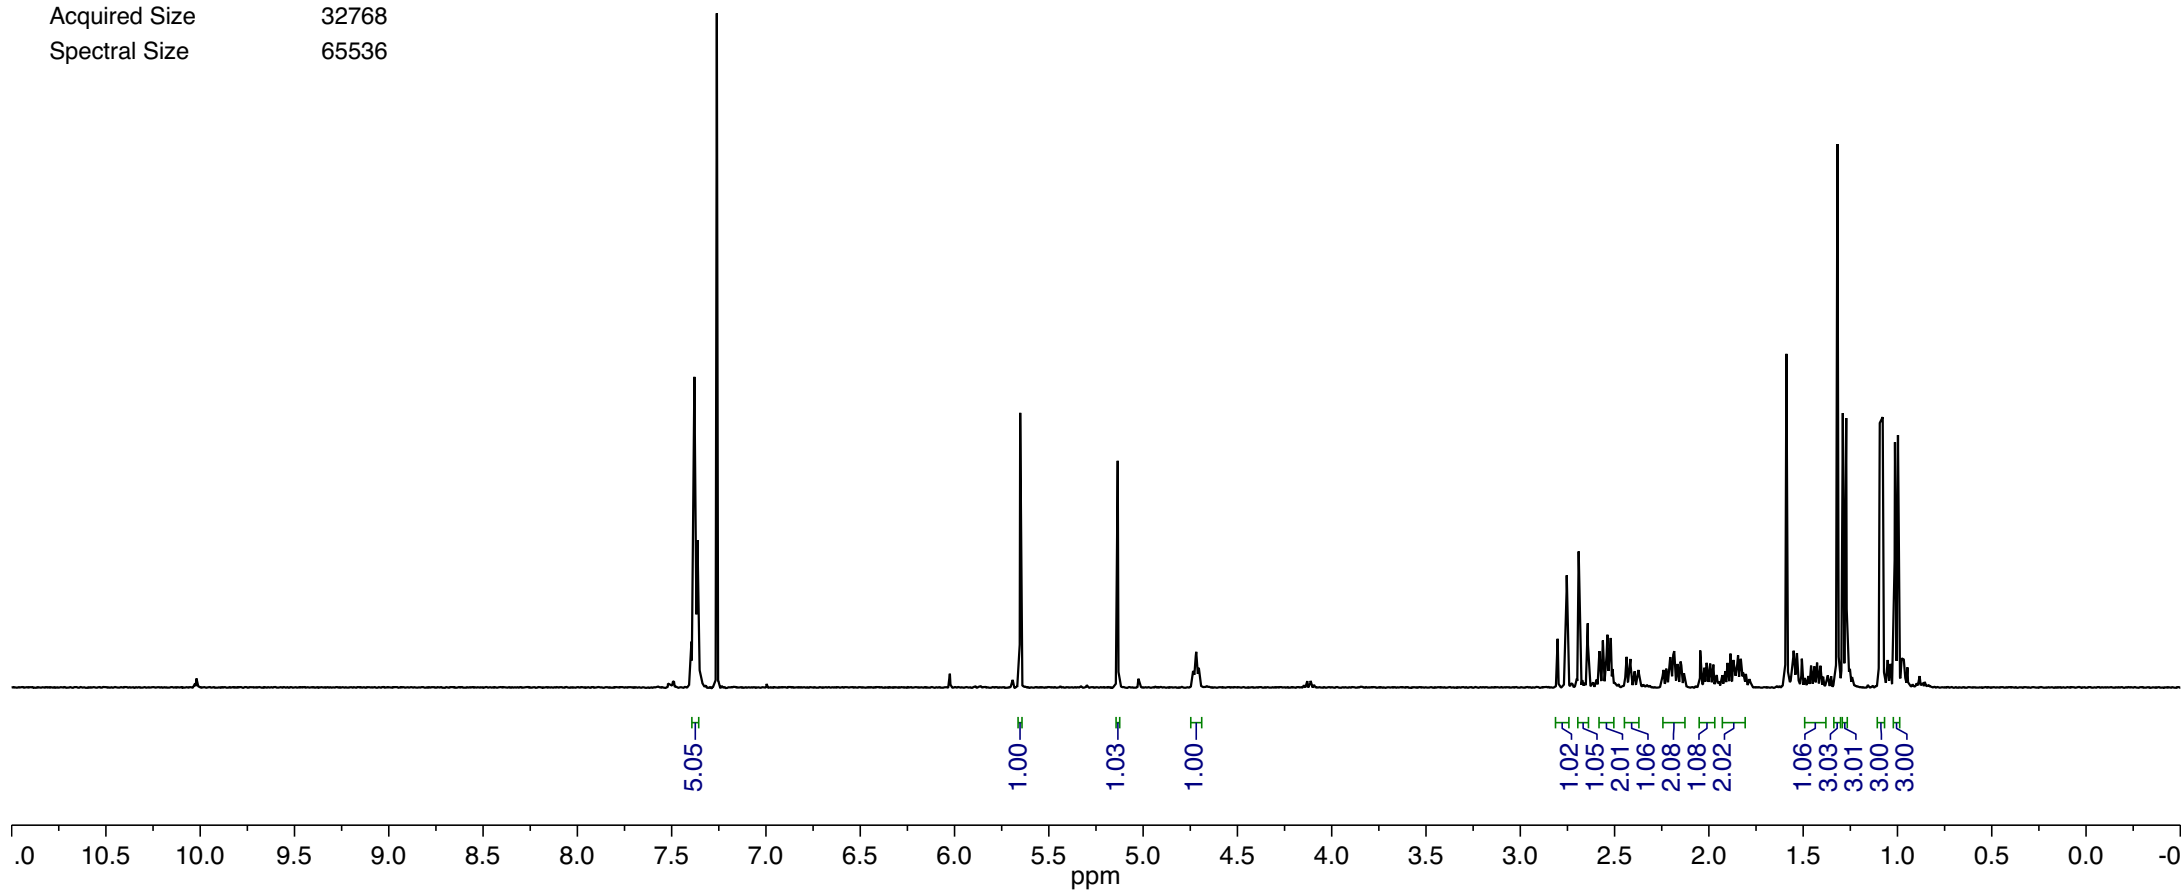

| Parameter              | Value                                              |
|------------------------|----------------------------------------------------|
| Data File Name         | / Volumes/ nmrdata/ ahan/ nmr/ 9-AH-084-CH/ 2/ fid |
| Title                  | 9-AH-084-CH.2.fid                                  |
| Origin                 | Bruker BioSpin GmbH                                |
| Solvent                | CDCl3                                              |
| Temperature            | 295.2                                              |
| Pulse Sequence         | zgpg30                                             |
| Number of Scans        | 750                                                |
| Receiver Gain          | 87.8                                               |
| Relaxation Delay       | 1.0000                                             |
| Pulse Width            | 10.0000                                            |
| Acquisition Time       | 1.3631                                             |
| Acquisition Date       | 2018-09-04T12:36:58                                |
| Spectrometer Frequency | 100.62                                             |
| Spectral Width         | 24038.5                                            |
| Lowest Frequency       | -1961.4                                            |
| Nucleus                | <sup>13</sup> C                                    |
| Acquired Size          | 32768                                              |
| Spectral Size          | 65536                                              |

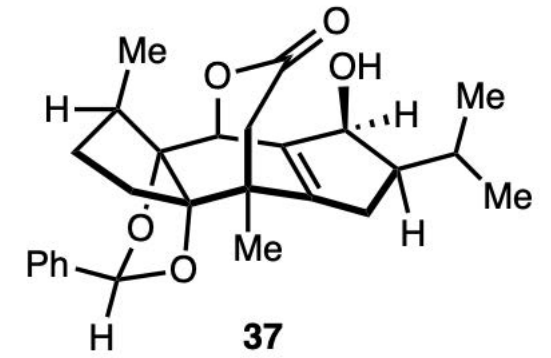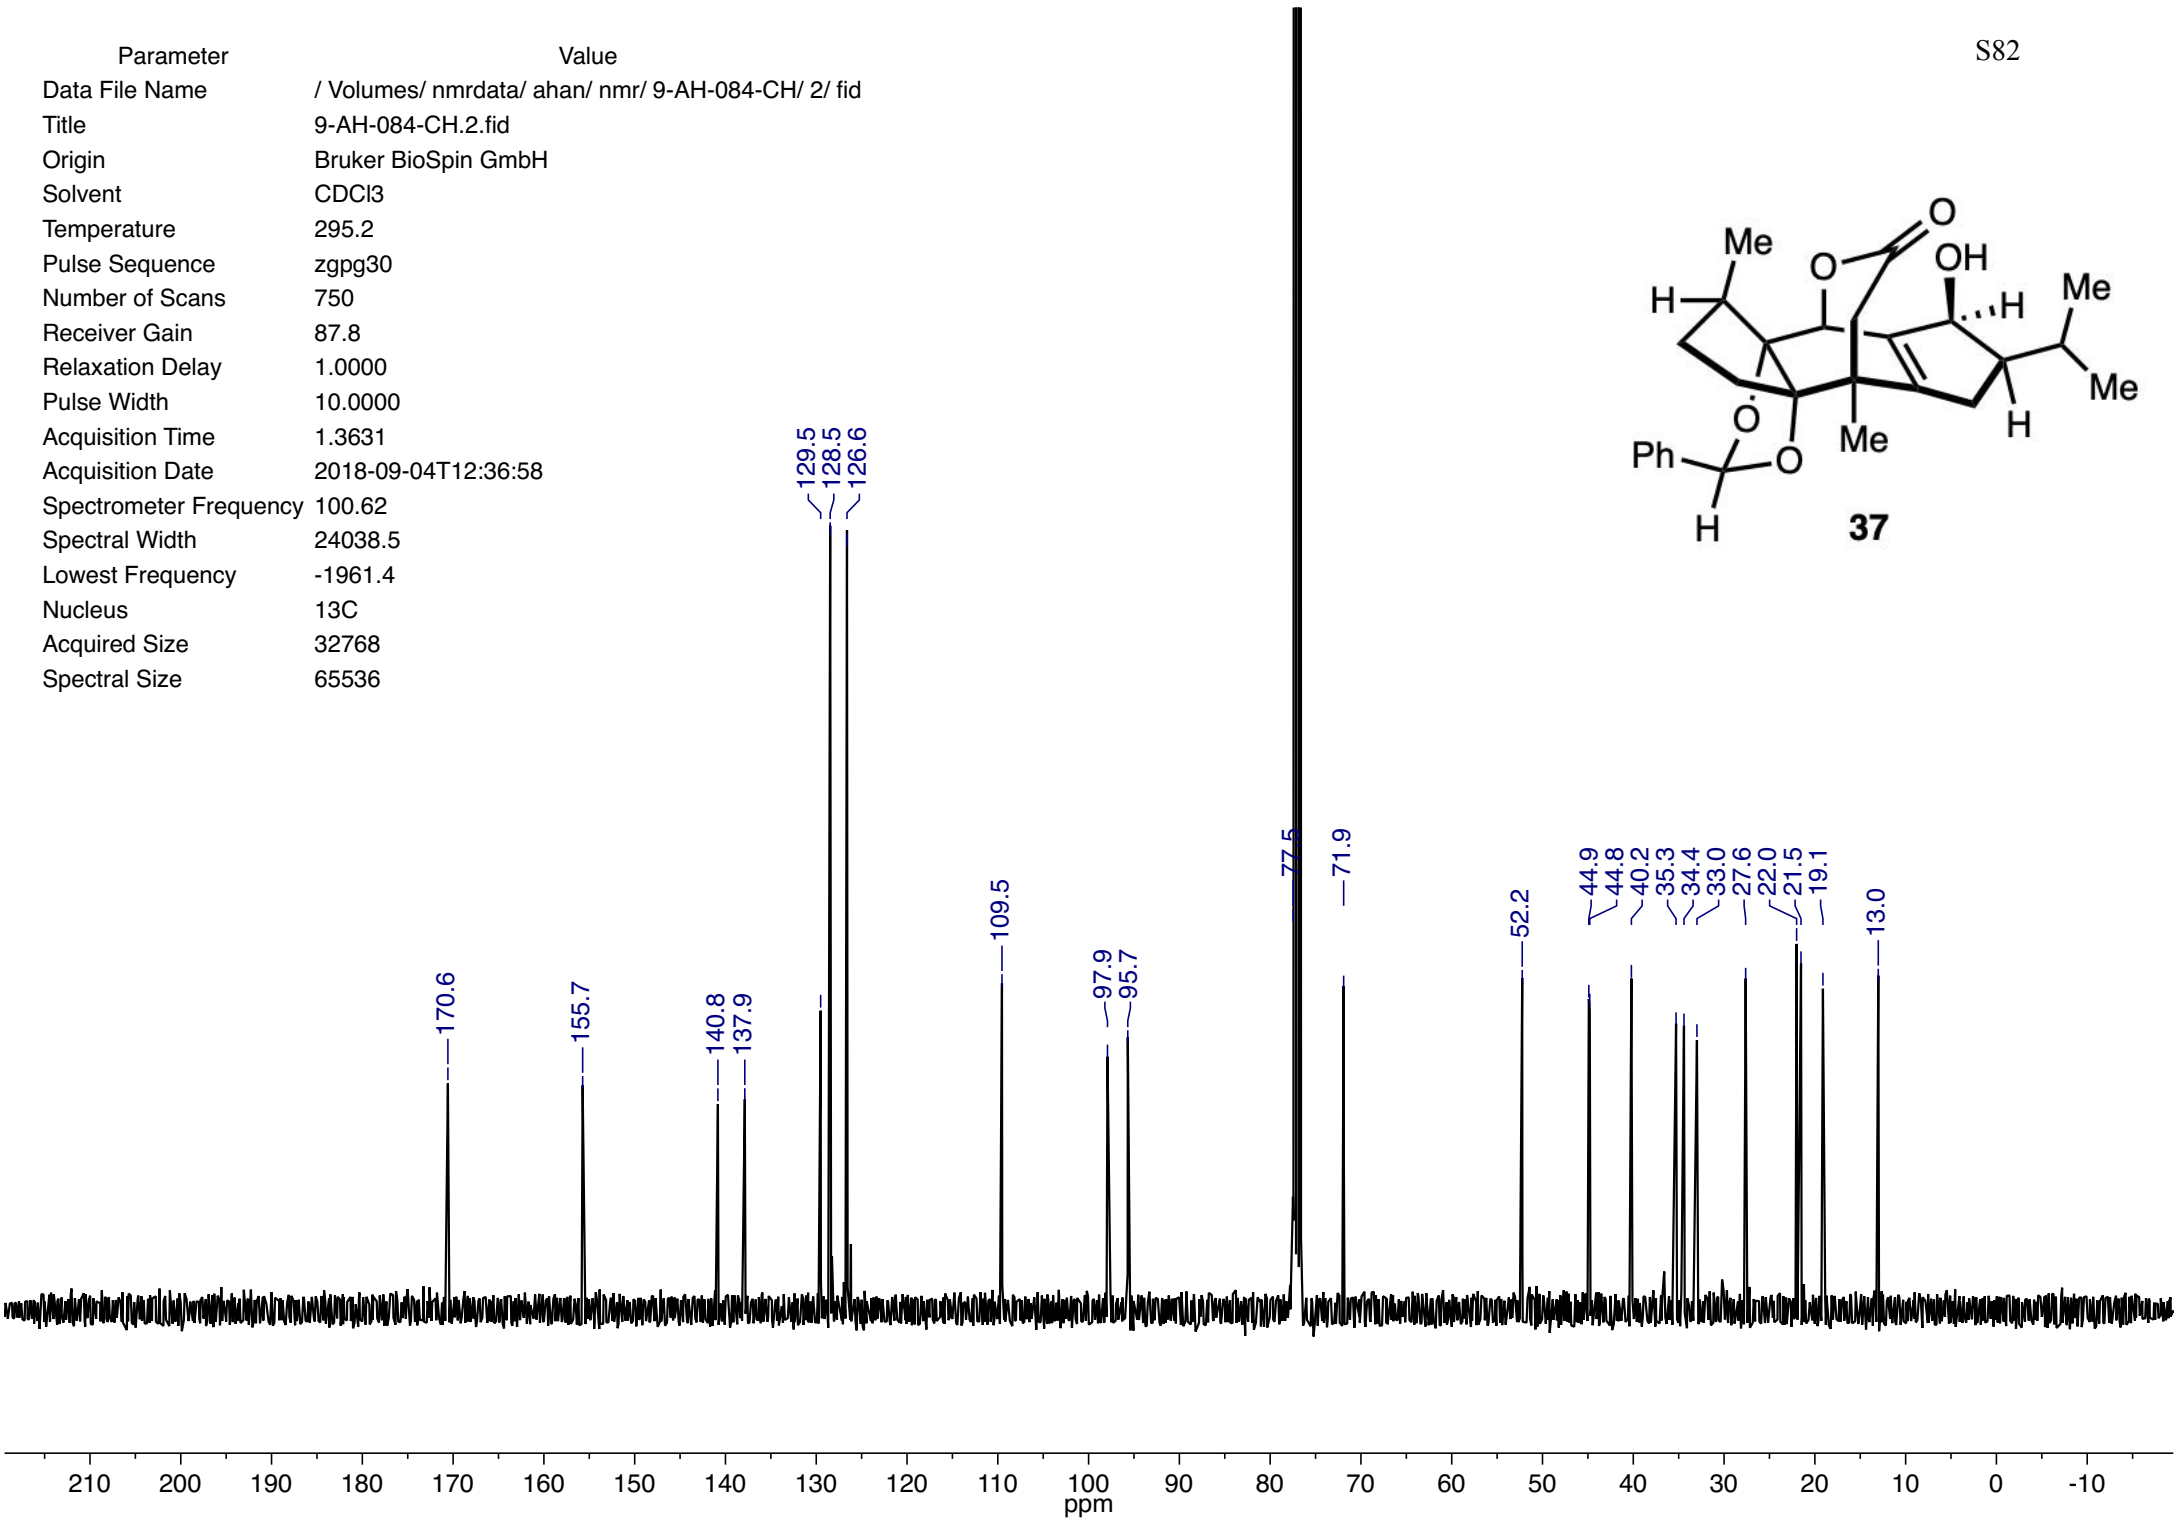

| Parameter              | Value                                         |
|------------------------|-----------------------------------------------|
| Data File Name         | /Volumes/nmrdata/ahan/nmr/9-AH-085-CH/ 1/ fid |
| Title                  | 9-AH-085-CH.1.fid                             |
| Origin                 | Bruker BioSpin GmbH                           |
| Solvent                | CDCl3                                         |
| Temperature            | 298.1                                         |
| Pulse Sequence         | zg30                                          |
| Number of Scans        | 3                                             |
| Receiver Gain          | 101.0                                         |
| Relaxation Delay       | 5.0000                                        |
| Pulse Width            | 10.0000                                       |
| Acquisition Time       | 3.9977                                        |
| Acquisition Date       | 2018-09-05T07:20:37                           |
| Spectrometer Frequency | 400.15                                        |
| Spectral Width         | 8196.7                                        |
| Lowest Frequency       | -1637.0                                       |
| Nucleus                | 1H                                            |
| Acquired Size          | 32768                                         |
| Spectral Size          | 65536                                         |

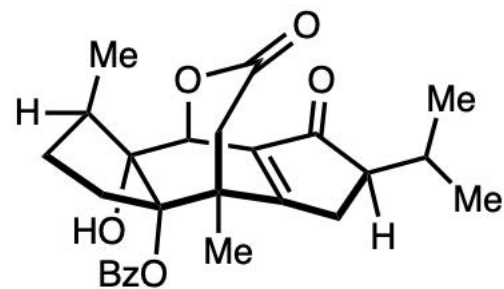**38***3:1 rr*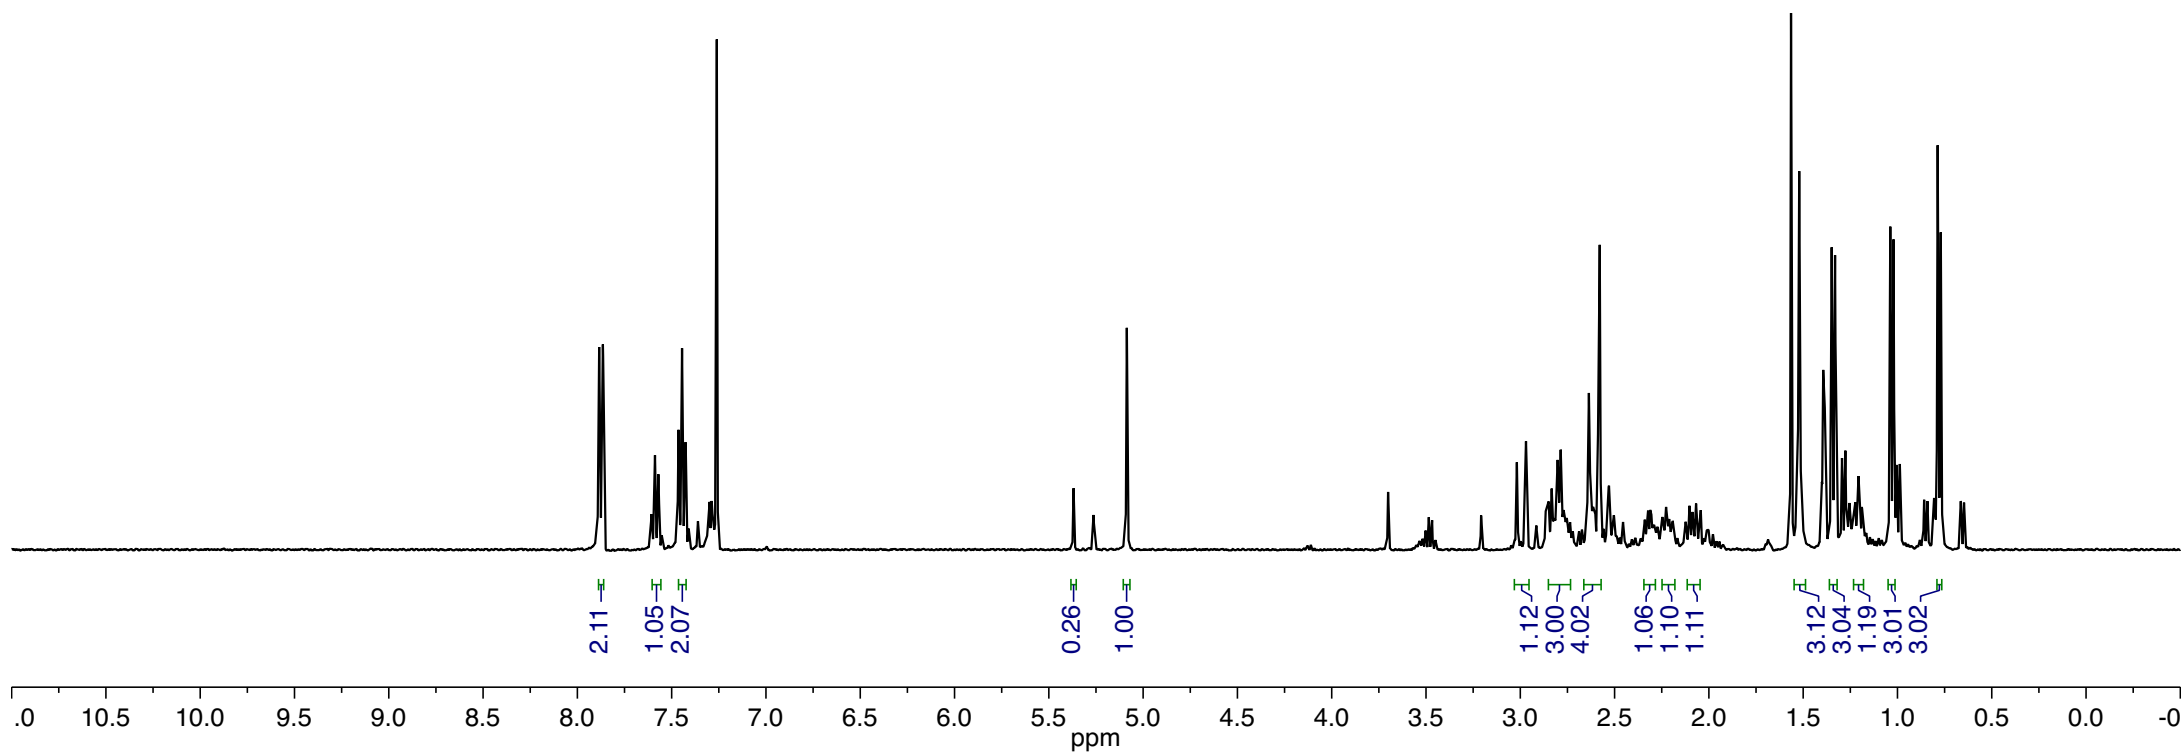

| Parameter              | Value                                                                 |
|------------------------|-----------------------------------------------------------------------|
| Data File Name         | /Volumes/nmrdata-1/ ahan/ vnmsys/ data/ 9-AH-086-P/ PROTON02.fid/ fid |
| Title                  | PROTON02                                                              |
| Origin                 | Varian                                                                |
| Solvent                | c6d6                                                                  |
| Temperature            | 25.0                                                                  |
| Pulse Sequence         | s2pul                                                                 |
| Number of Scans        | 8                                                                     |
| Receiver Gain          | 42                                                                    |
| Relaxation Delay       | 5.0000                                                                |
| Pulse Width            | 5.8000                                                                |
| Acquisition Time       | 3.0000                                                                |
| Acquisition Date       | 2018-09-05T11:33:16                                                   |
| Spectrometer Frequency | 499.63                                                                |
| Spectral Width         | 8000.0                                                                |
| Lowest Frequency       | -1008.8                                                               |
| Nucleus                | 1H                                                                    |
| Acquired Size          | 24000                                                                 |
| Spectral Size          | 65536                                                                 |

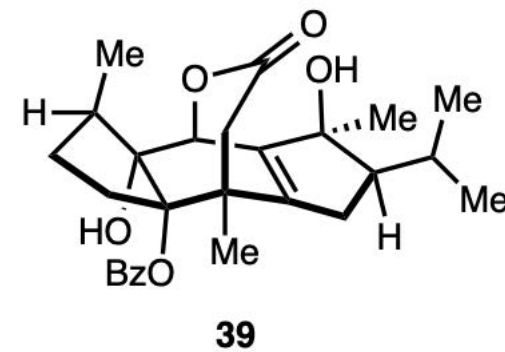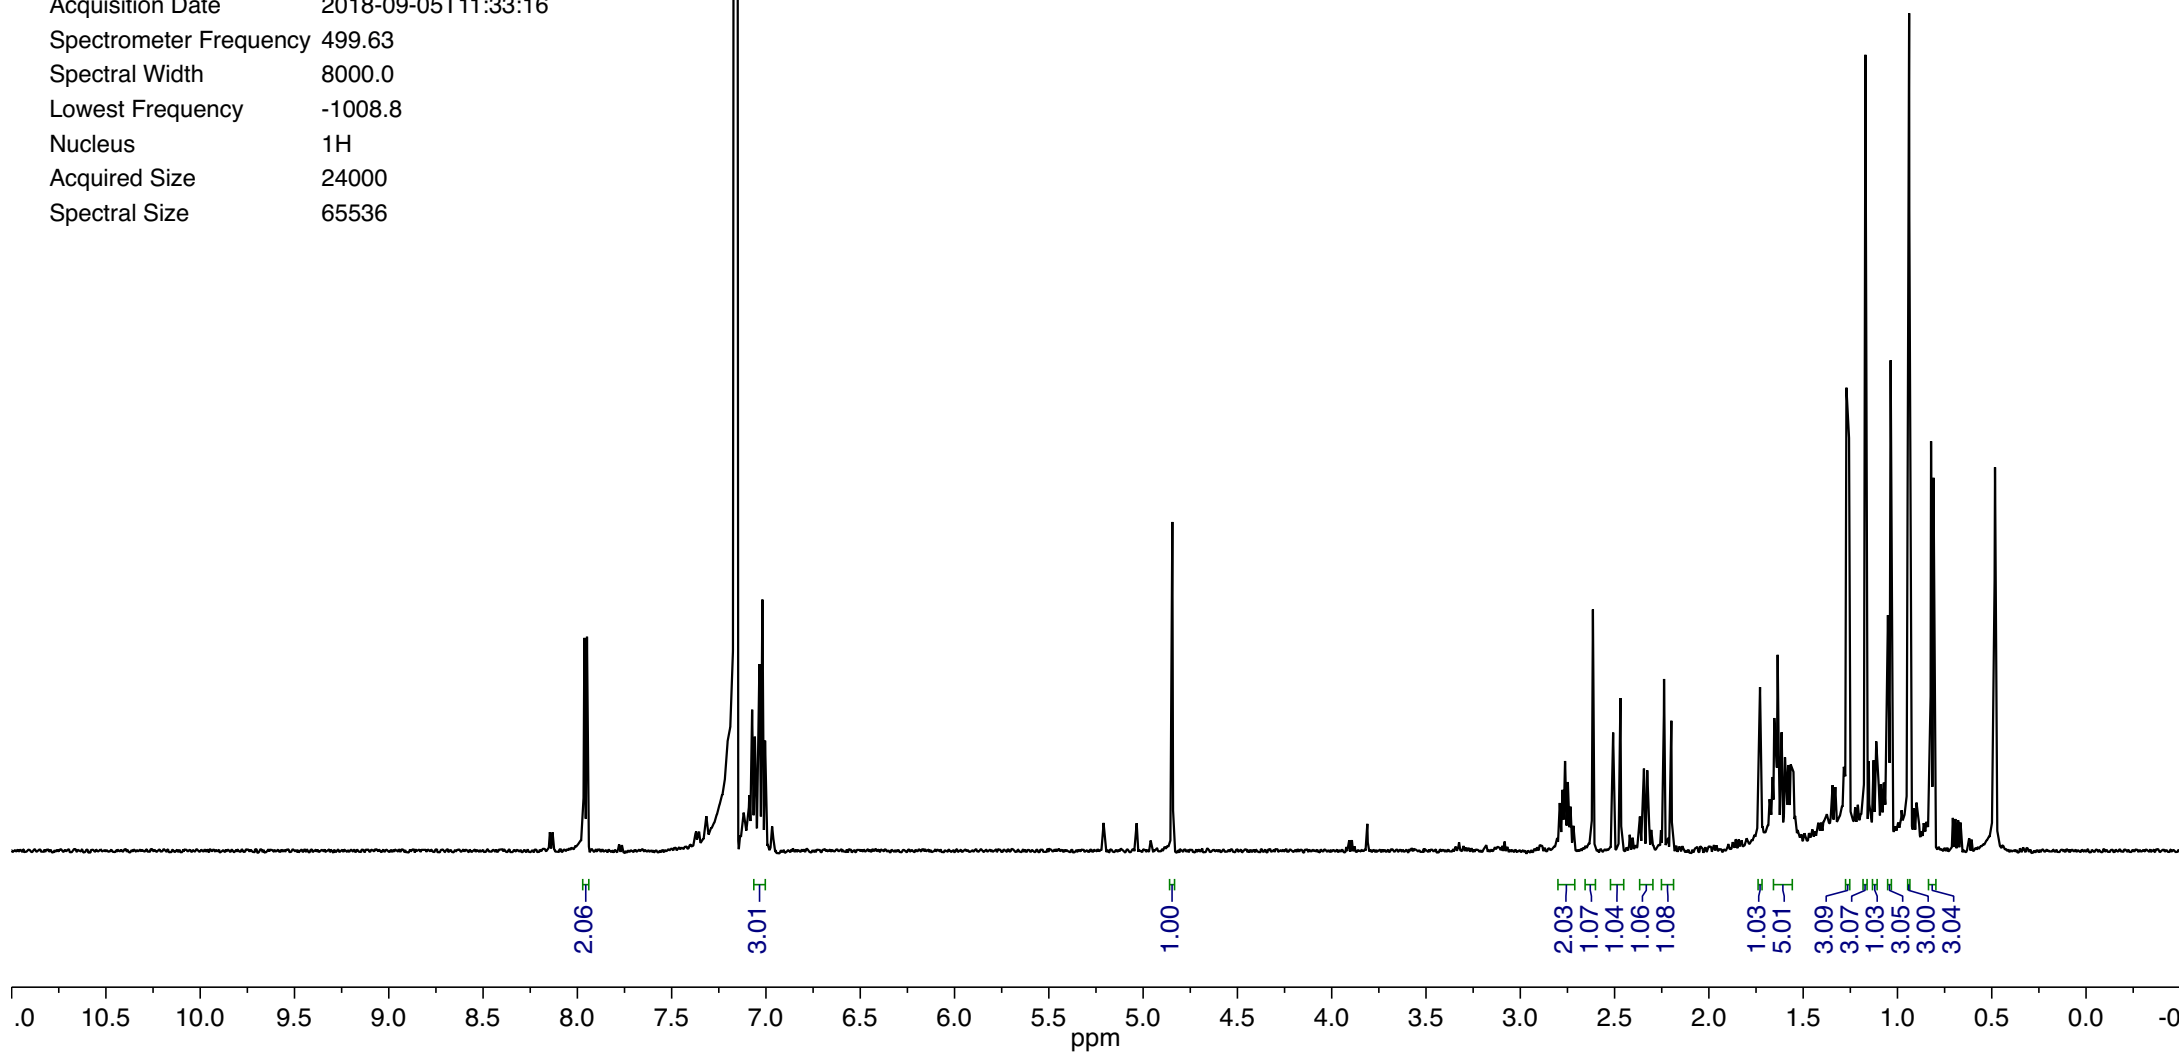



| Parameter              | Value                                        |
|------------------------|----------------------------------------------|
| Data File Name         | /Volumes/nmrdata/ahan/nmr/9-AH-086-CH/ 2/fid |
| Title                  | 9-AH-086-CH.2.fid                            |
| Origin                 | Bruker BioSpin GmbH                          |
| Solvent                | C6D6                                         |
| Temperature            | 295.1                                        |
| Pulse Sequence         | zgpg30                                       |
| Number of Scans        | 800                                          |
| Receiver Gain          | 72.0                                         |
| Relaxation Delay       | 1.0000                                       |
| Pulse Width            | 10.0000                                      |
| Acquisition Time       | 1.3631                                       |
| Acquisition Date       | 2018-09-05T14:01:42                          |
| Spectrometer Frequency | 100.62                                       |
| Spectral Width         | 24038.5                                      |
| Lowest Frequency       | -1927.3                                      |
| Nucleus                | <sup>13</sup> C                              |
| Acquired Size          | 32768                                        |
| Spectral Size          | 65536                                        |

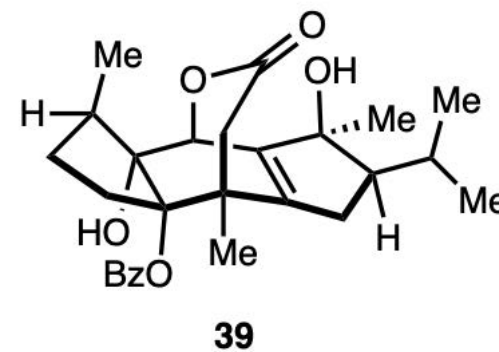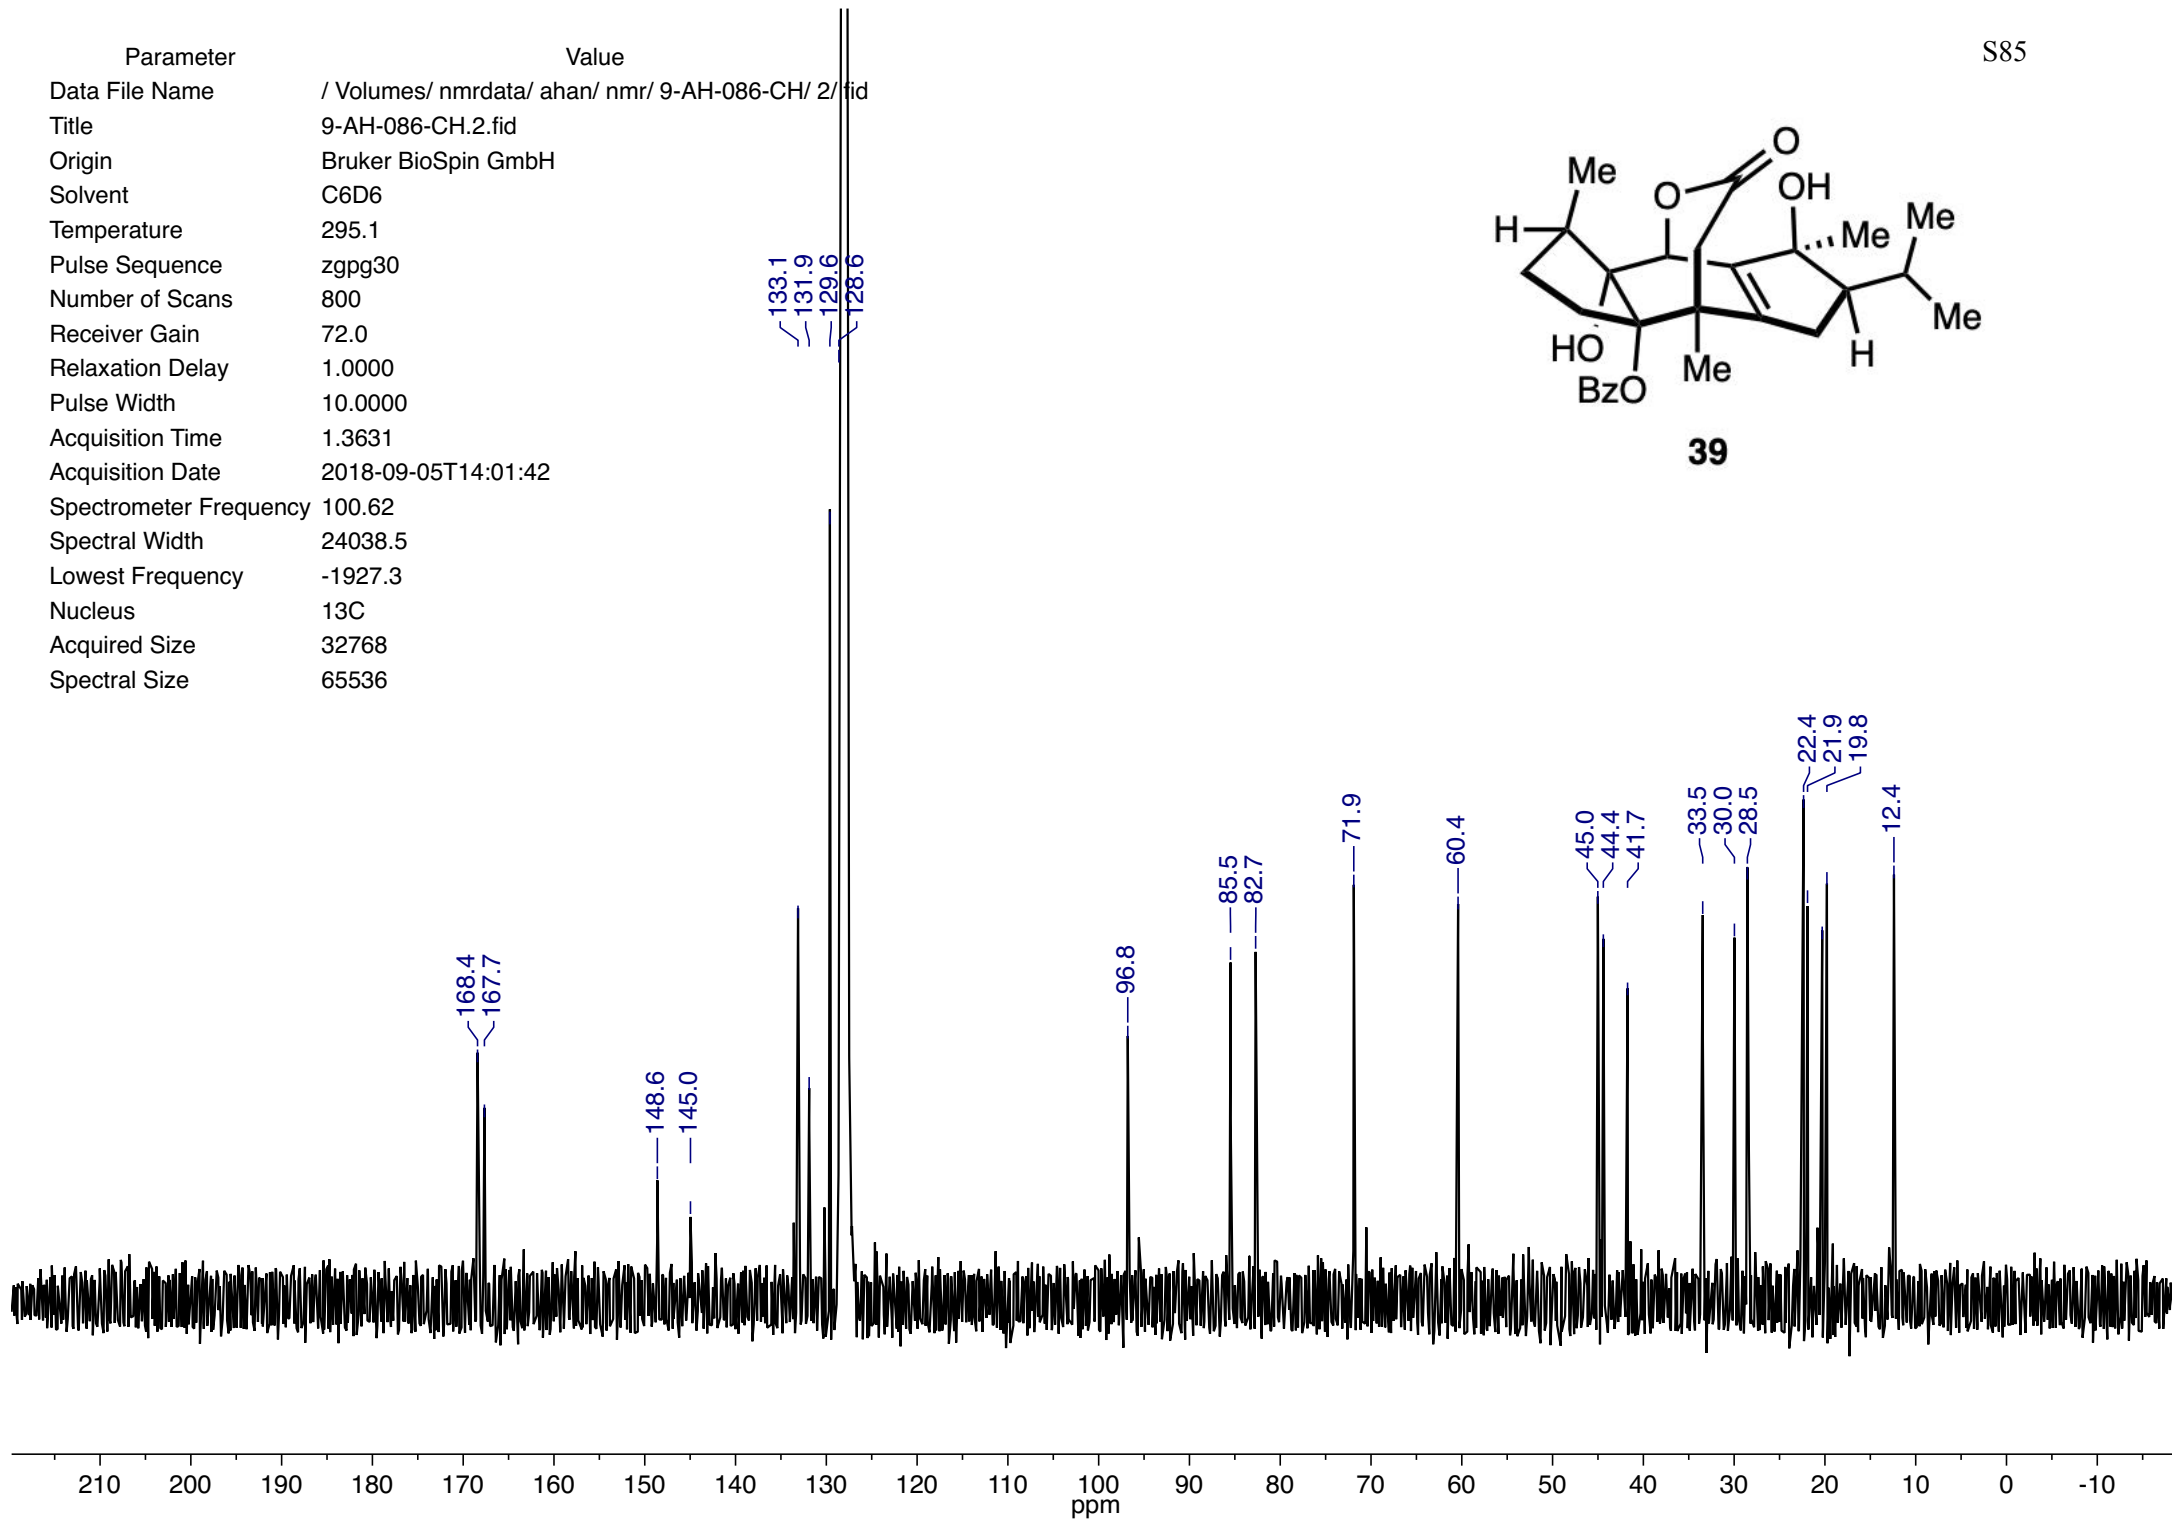

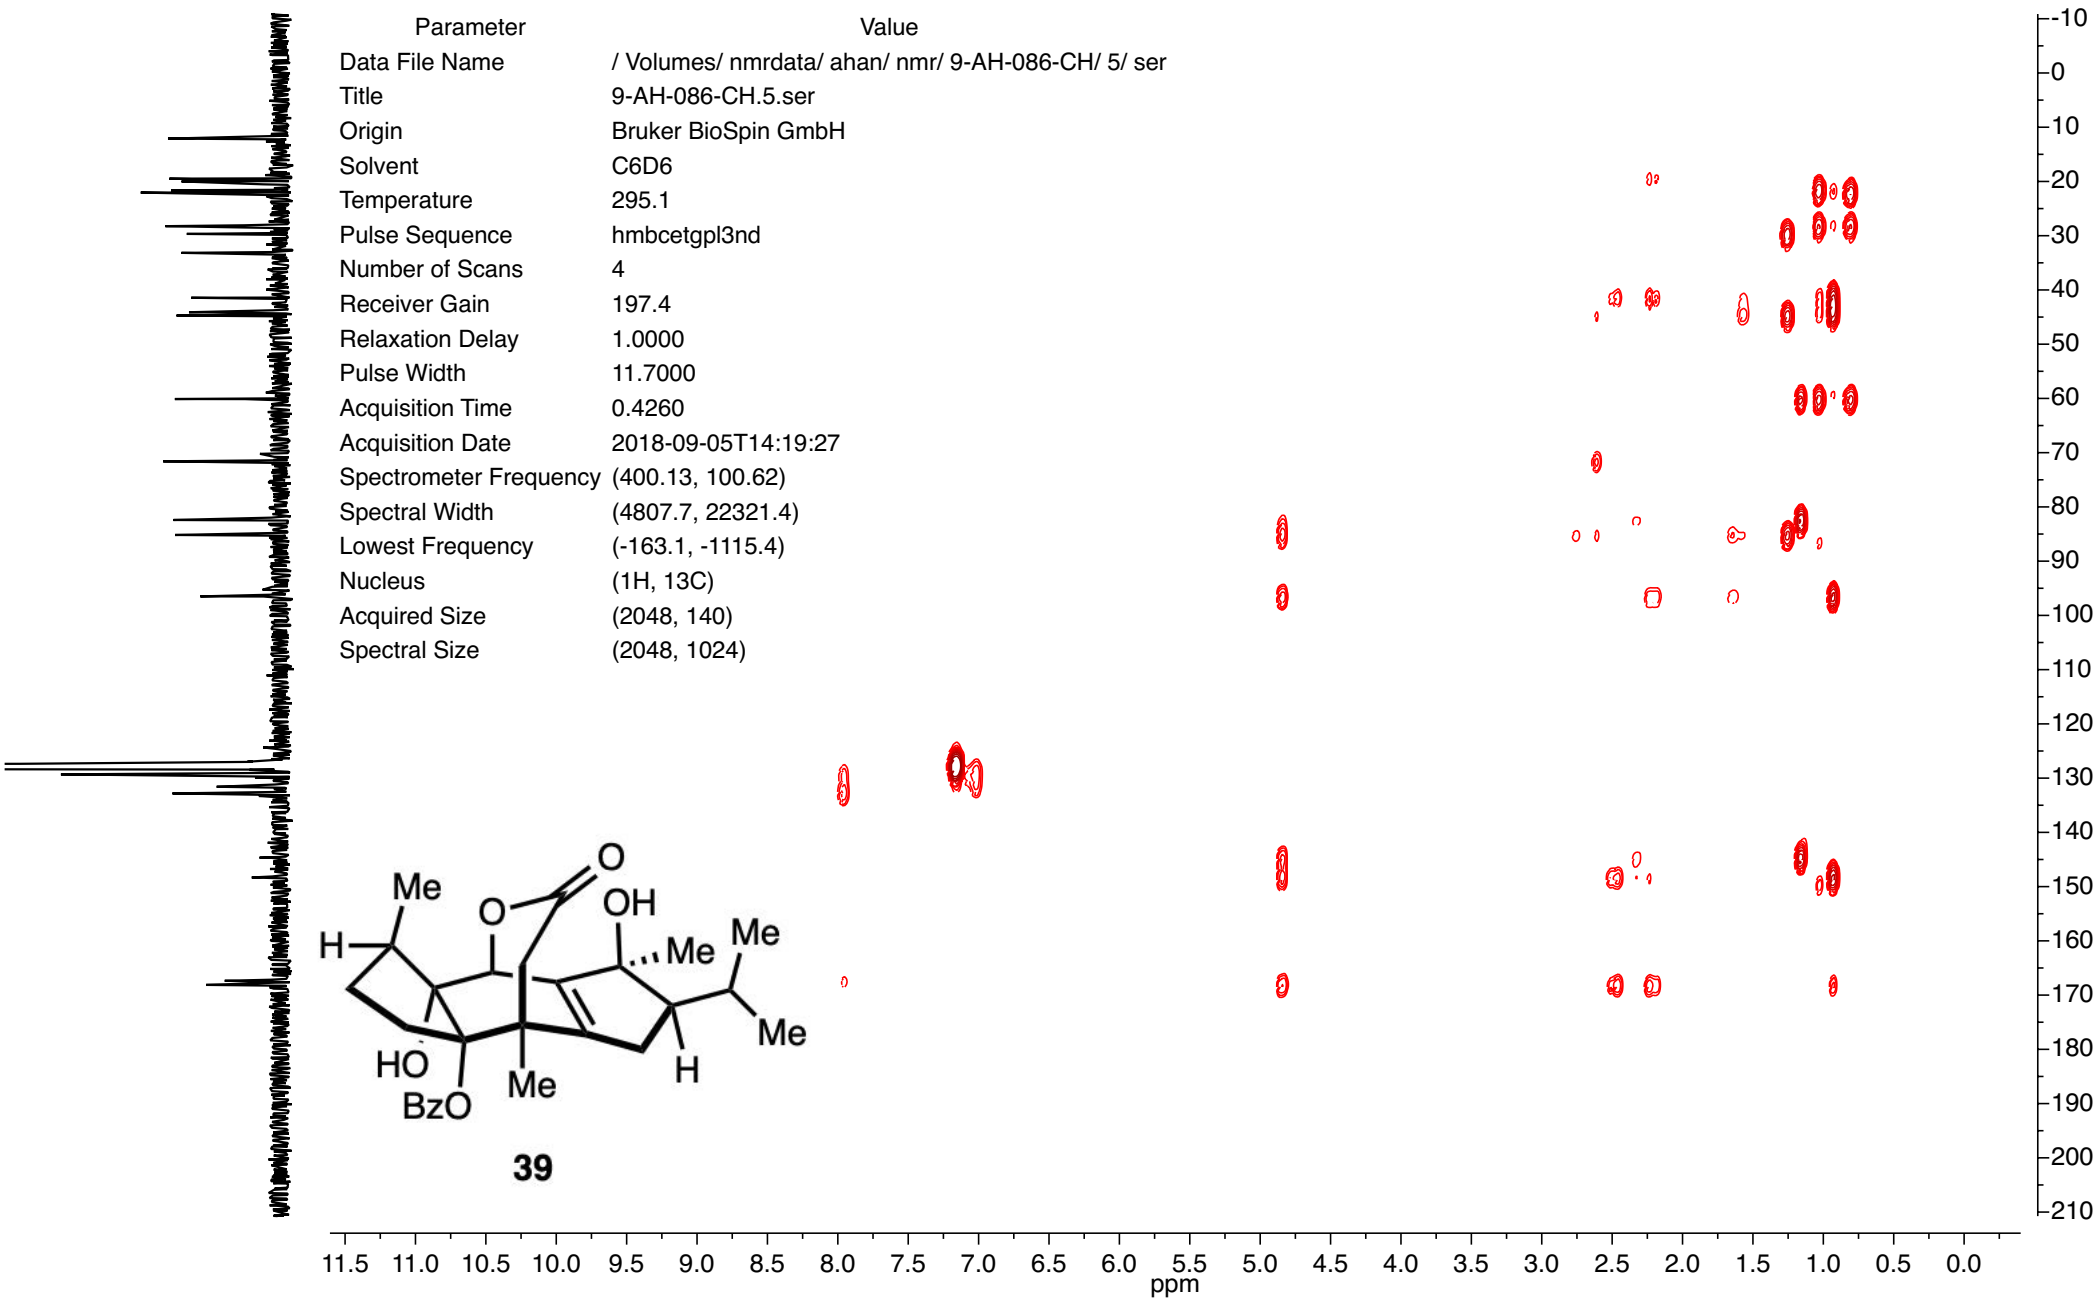

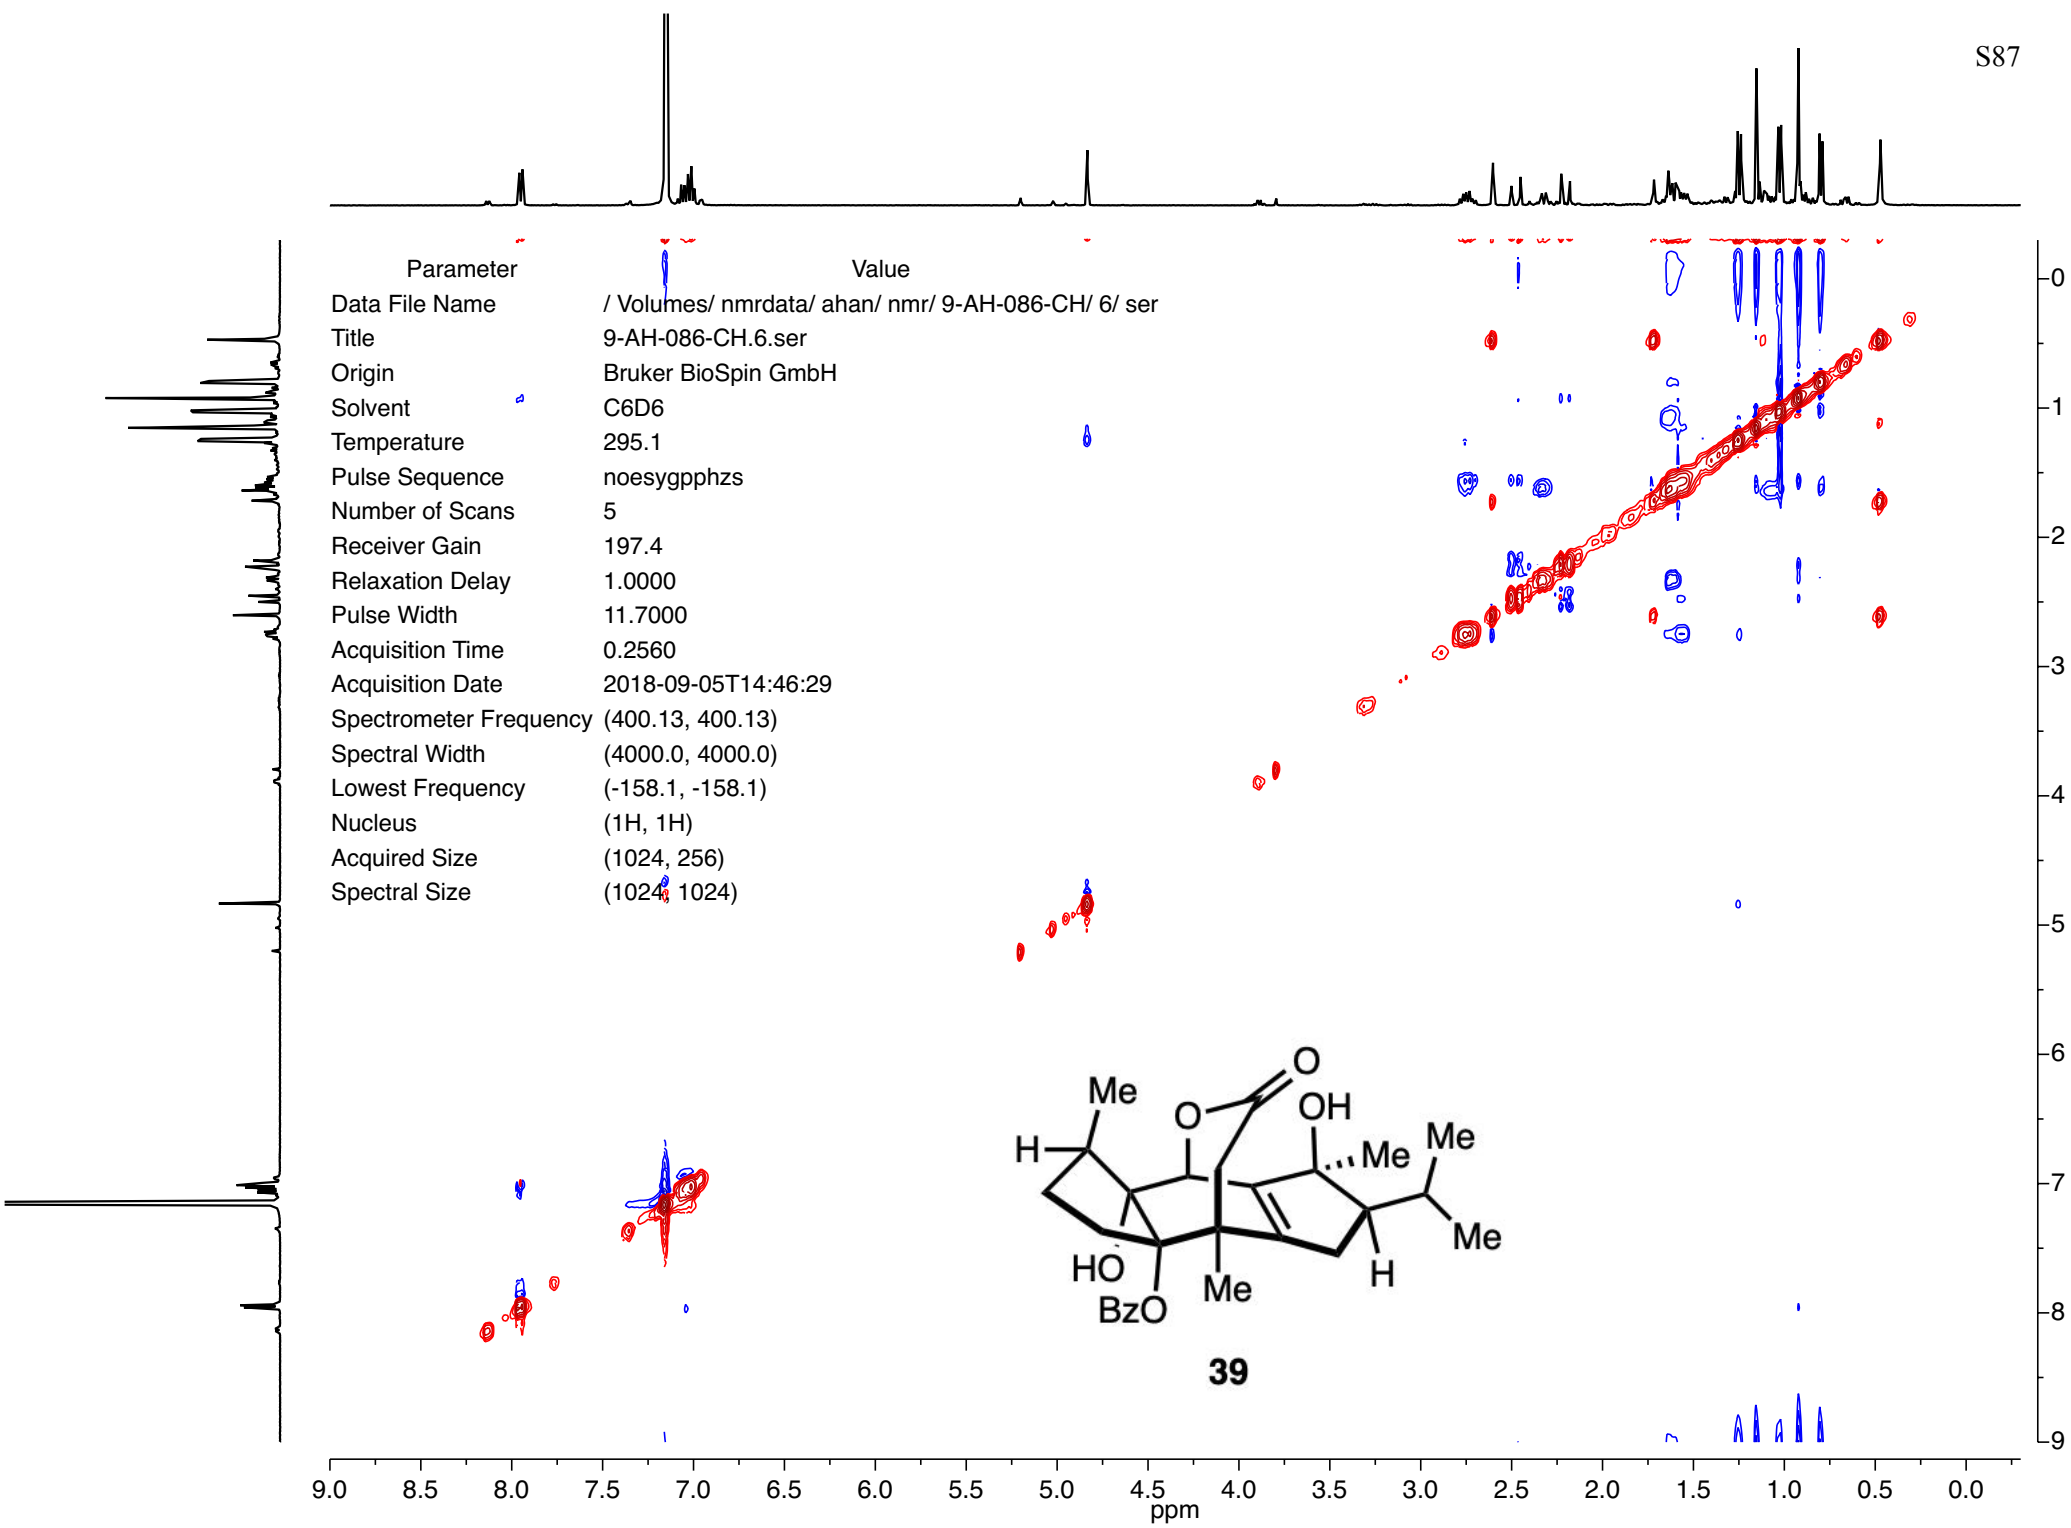

| Parameter              | Value                                       |
|------------------------|---------------------------------------------|
| Data File Name         | /Volumes/nmrdata/ahan/nmr/9-AH-087-CH/1/fid |
| Title                  | 9-AH-087-CH.1.fid                           |
| Origin                 | Bruker BioSpin GmbH                         |
| Solvent                | CDCl3                                       |
| Temperature            | 295.1                                       |
| Pulse Sequence         | zg30                                        |
| Number of Scans        | 1                                           |
| Receiver Gain          | 197.4                                       |
| Relaxation Delay       | 5.0000                                      |
| Pulse Width            | 11.7000                                     |
| Acquisition Time       | 4.0894                                      |
| Acquisition Date       | 2018-09-06T06:39:57                         |
| Spectrometer Frequency | 400.13                                      |
| Spectral Width         | 8012.8                                      |
| Lowest Frequency       | -1545.4                                     |
| Nucleus                | 1H                                          |
| Acquired Size          | 32768                                       |
| Spectral Size          | 65536                                       |

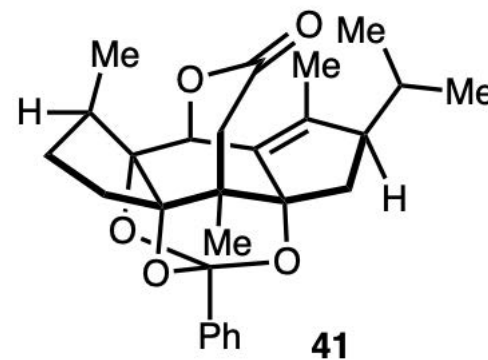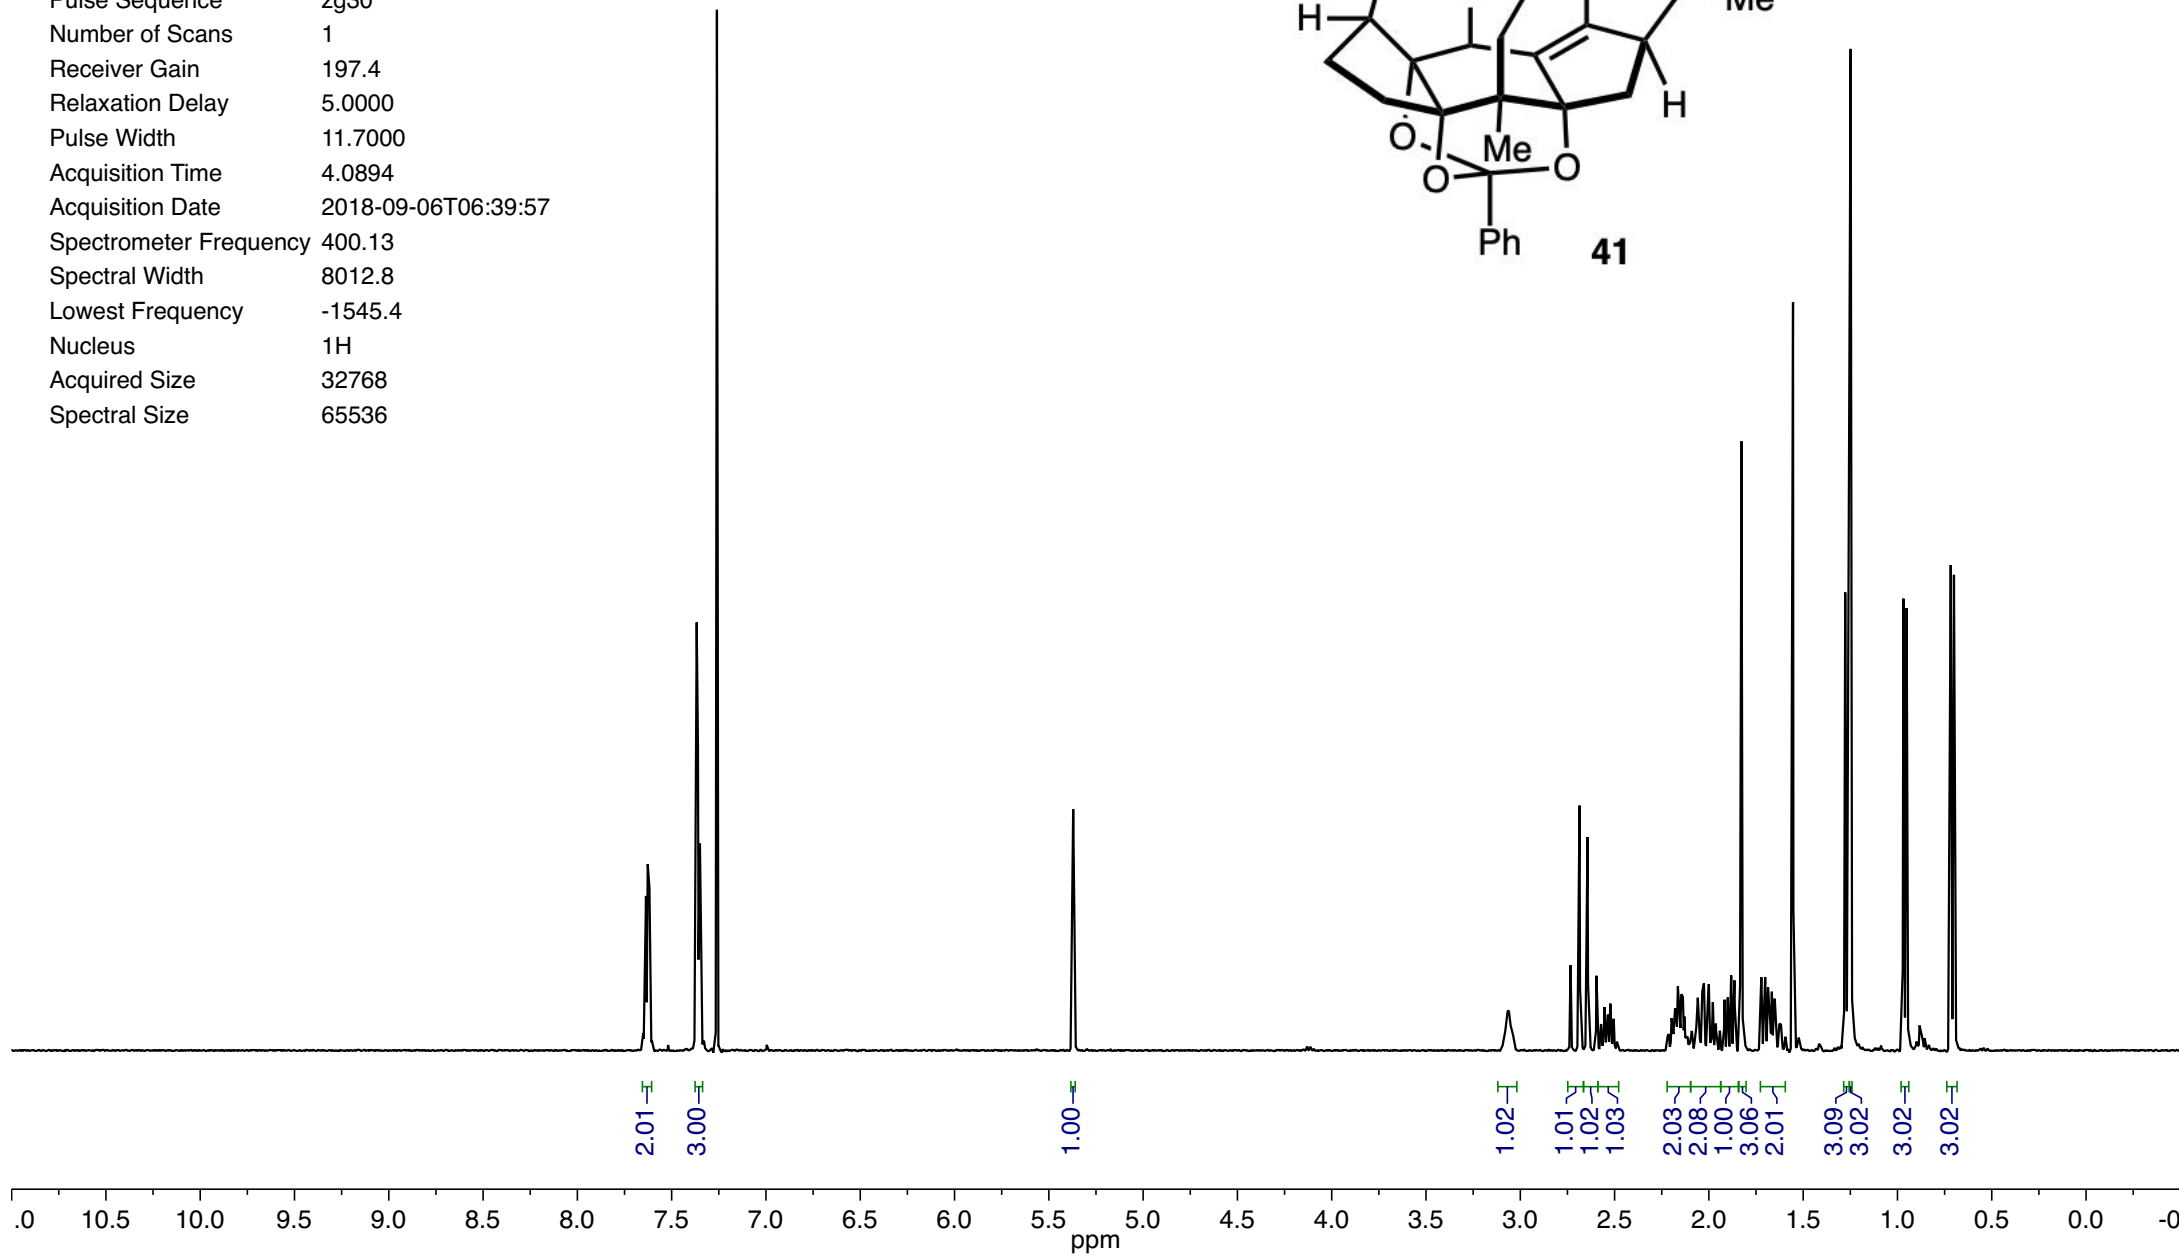

| Parameter              | Value                                         |
|------------------------|-----------------------------------------------|
| Data File Name         | /Volumes/nmrdata/ahan/nmr/9-AH-087-CH/ 2/ fid |
| Title                  | 9-AH-087-CH.2.fid                             |
| Origin                 | Bruker BioSpin GmbH                           |
| Solvent                | CDCl3                                         |
| Temperature            | 295.1                                         |
| Pulse Sequence         | zgpg30                                        |
| Number of Scans        | 1000                                          |
| Receiver Gain          | 72.0                                          |
| Relaxation Delay       | 1.0000                                        |
| Pulse Width            | 10.0000                                       |
| Acquisition Time       | 1.3631                                        |
| Acquisition Date       | 2018-09-06T07:20:53                           |
| Spectrometer Frequency | 100.62                                        |
| Spectral Width         | 24038.5                                       |
| Lowest Frequency       | -1961.3                                       |
| Nucleus                | <sup>13</sup> C                               |
| Acquired Size          | 32768                                         |
| Spectral Size          | 65536                                         |

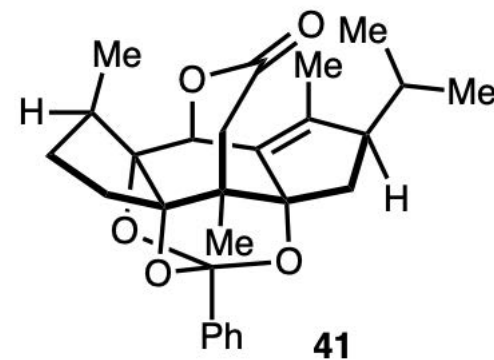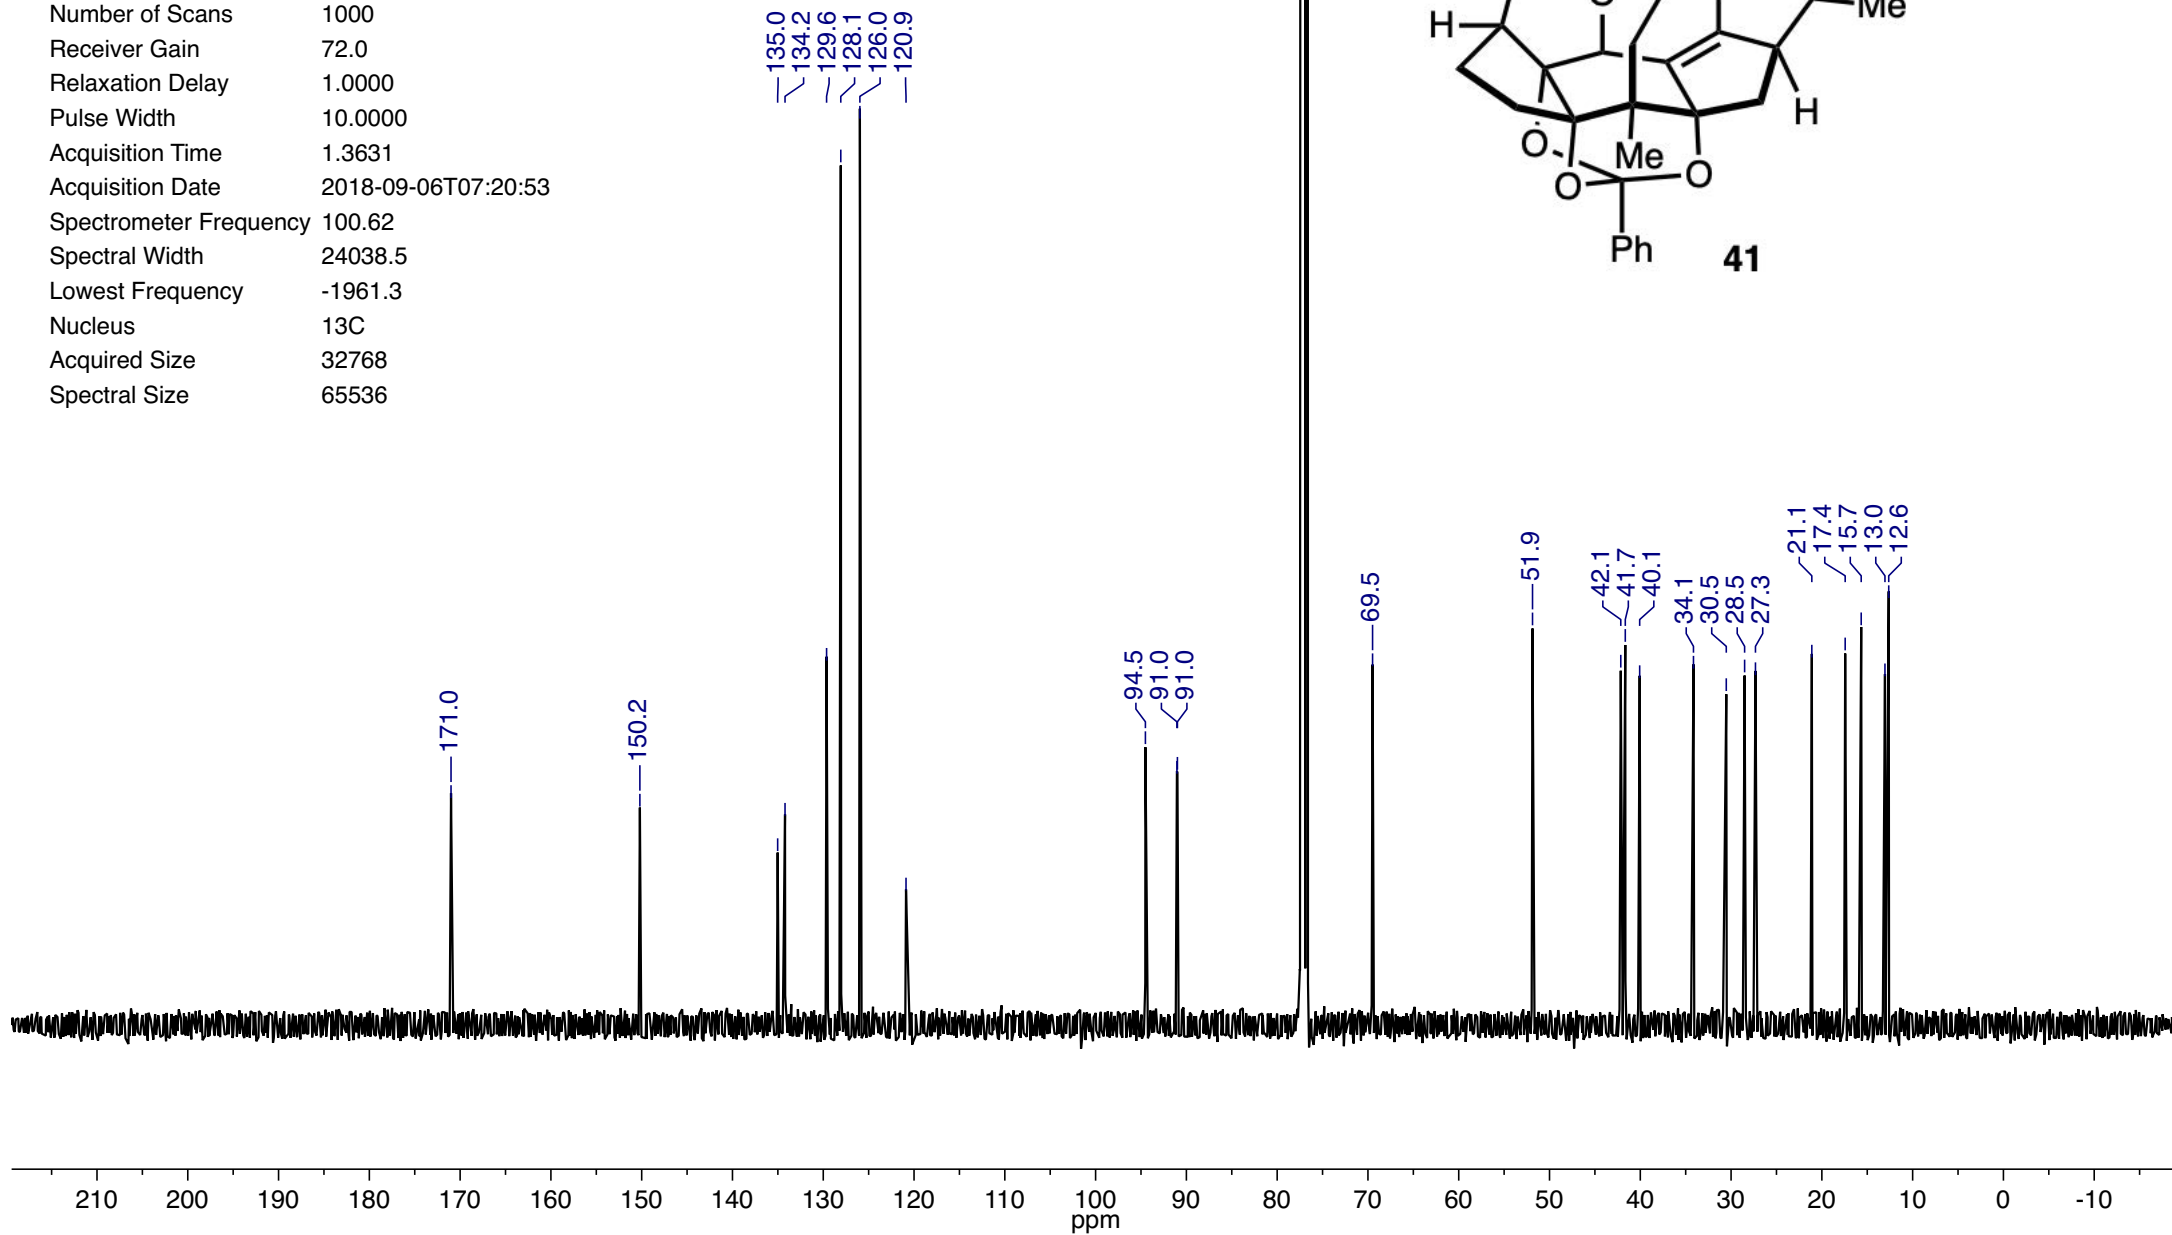

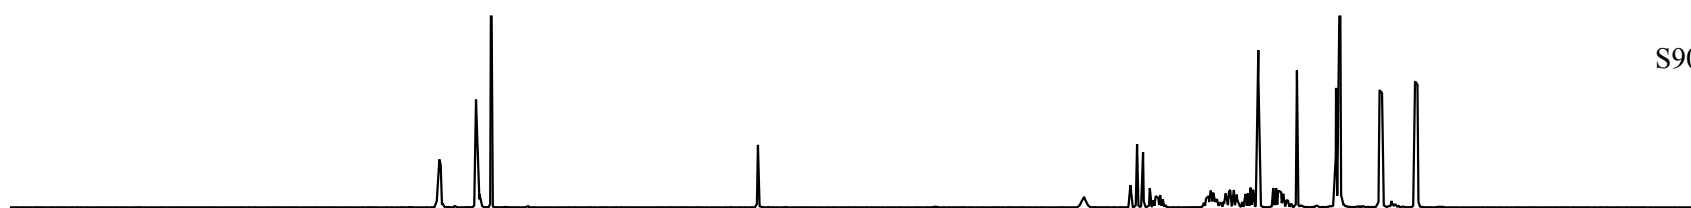

| Parameter              | Value                                              |
|------------------------|----------------------------------------------------|
| Data File Name         | / Volumes/ nmrdata/ ahan/ nmr/ 9-AH-087-CH/ 5/ ser |
| Title                  | 9-AH-087-CH.5.ser                                  |
| Origin                 | Bruker BioSpin GmbH                                |
| Solvent                | CDCl3                                              |
| Temperature            | 295.2                                              |
| Pulse Sequence         | hsqcetgpcisp2.4                                    |
| Number of Scans        | 4                                                  |
| Receiver Gain          | 197.4                                              |
| Relaxation Delay       | 1.0000                                             |
| Pulse Width            | 11.7000                                            |
| Acquisition Time       | 0.2135                                             |
| Acquisition Date       | 2018-09-06T08:09:47                                |
| Spectrometer Frequency | (400.13, 100.62)                                   |
| Spectral Width         | (4795.4, 16611.3)                                  |
| Lowest Frequency       | (-517.1, -1262.8)                                  |
| Nucleus                | (1H, 13C)                                          |
| Acquired Size          | (1024, 180)                                        |
| Spectral Size          | (1024, 1024)                                       |

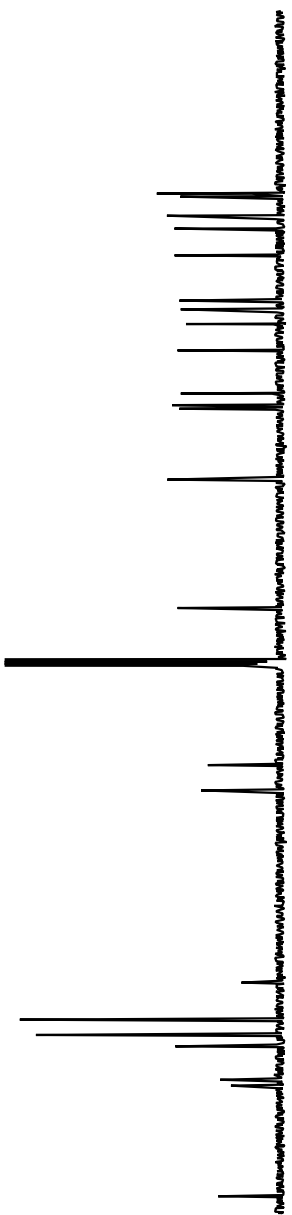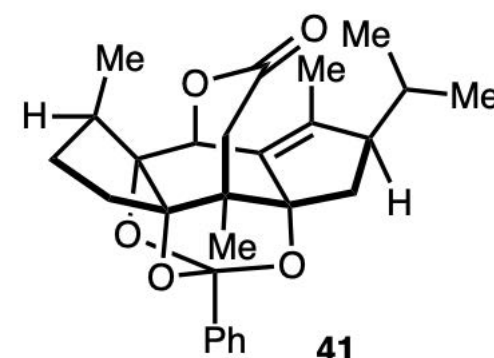

10.5 10.0 9.5 9.0 8.5 8.0 7.5 7.0 6.5 6.0 5.5 5.0 4.5 4.0 3.5 3.0 2.5 2.0 1.5 1.0 0.5 0.0 -0.5 -1.0  
ppm

-10  
0  
10  
20  
30  
40  
50  
60  
70  
80  
90  
100  
110  
120  
130  
140  
150

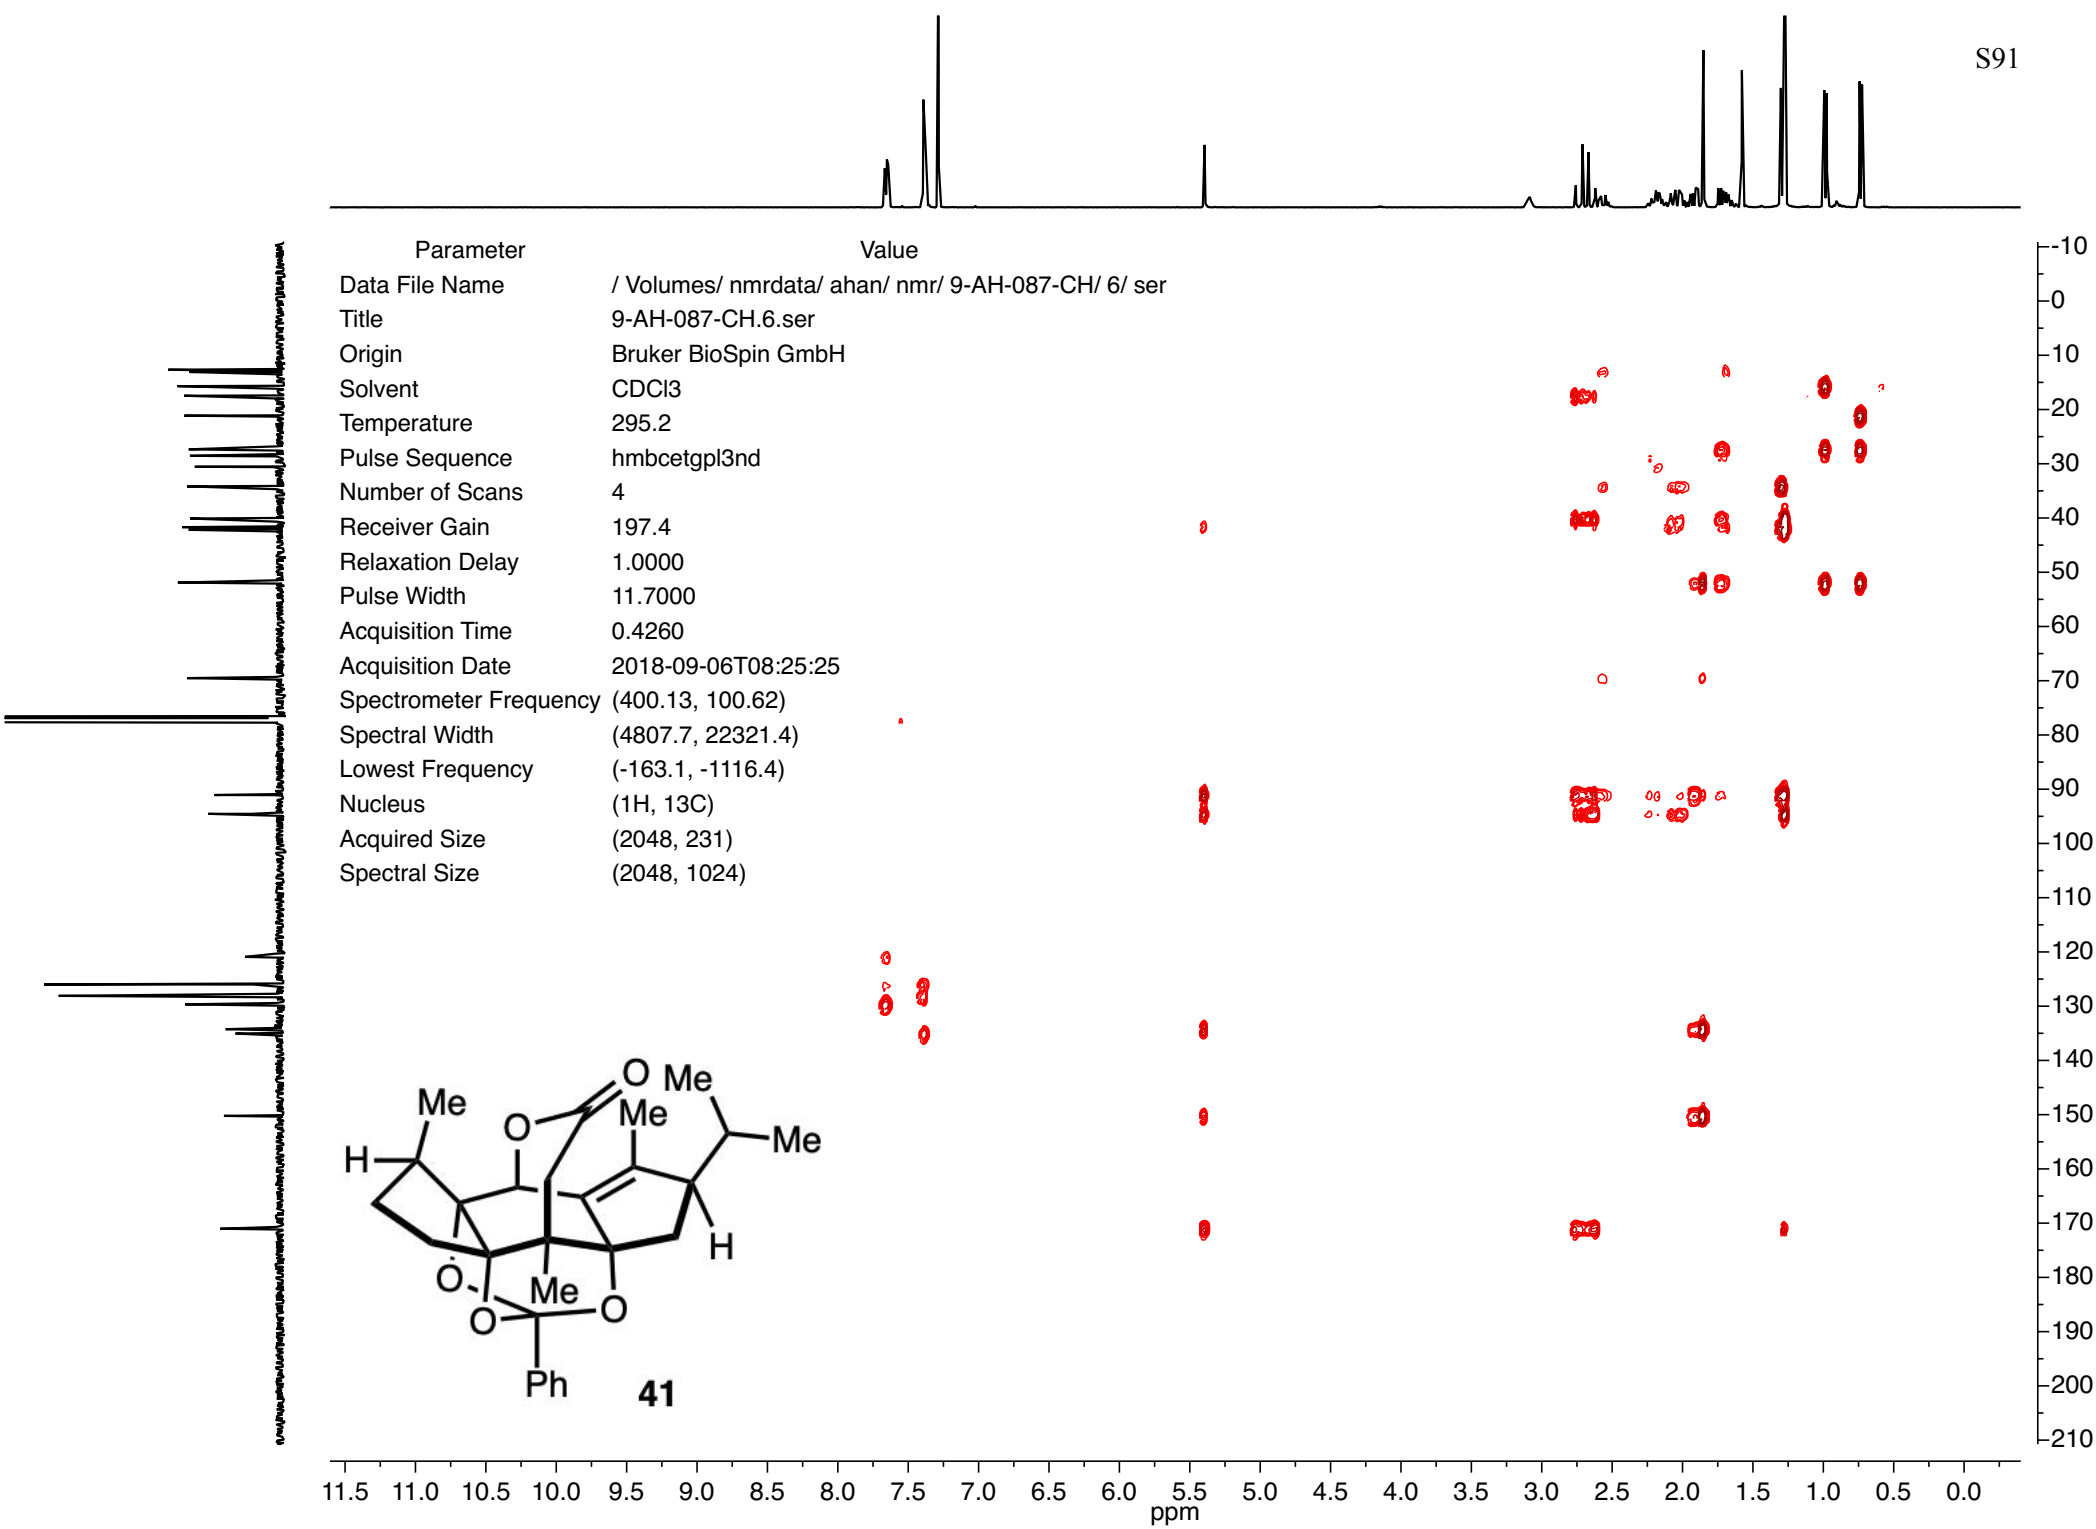

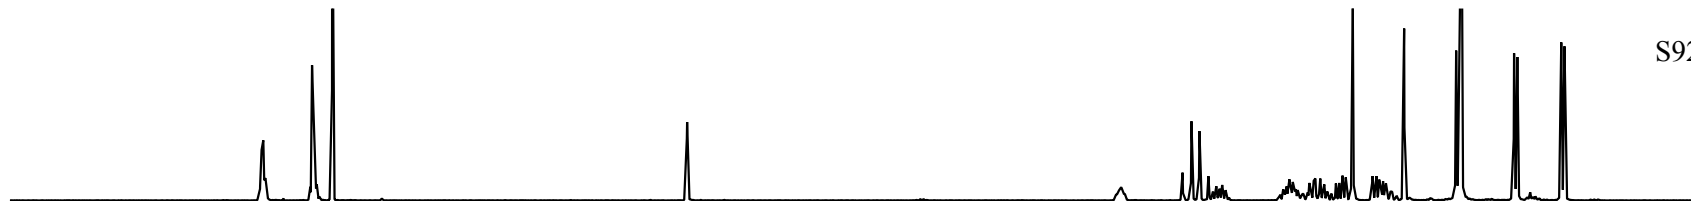

| Parameter              | Value                                              |
|------------------------|----------------------------------------------------|
| Data File Name         | / Volumes/ nmrdata/ ahan/ nmr/ 9-AH-087-CH/ 4/ ser |
| Title                  | 9-AH-087-CH.4.ser                                  |
| Origin                 | Bruker BioSpin GmbH                                |
| Solvent                | CDCl3                                              |
| Temperature            | 295.2                                              |
| Pulse Sequence         | noesygpghzs                                        |
| Number of Scans        | 6                                                  |
| Receiver Gain          | 197.4                                              |
| Relaxation Delay       | 1.0000                                             |
| Pulse Width            | 11.7000                                            |
| Acquisition Time       | 0.2560                                             |
| Acquisition Date       | 2018-09-06T07:23:35                                |
| Spectrometer Frequency | (400.13, 400.13)                                   |
| Spectral Width         | (4000.0, 4000.0)                                   |
| Lowest Frequency       | (-158.1, -158.1)                                   |
| Nucleus                | (1H, 1H)                                           |
| Acquired Size          | (1024, 256)                                        |
| Spectral Size          | (1024, 1024)                                       |

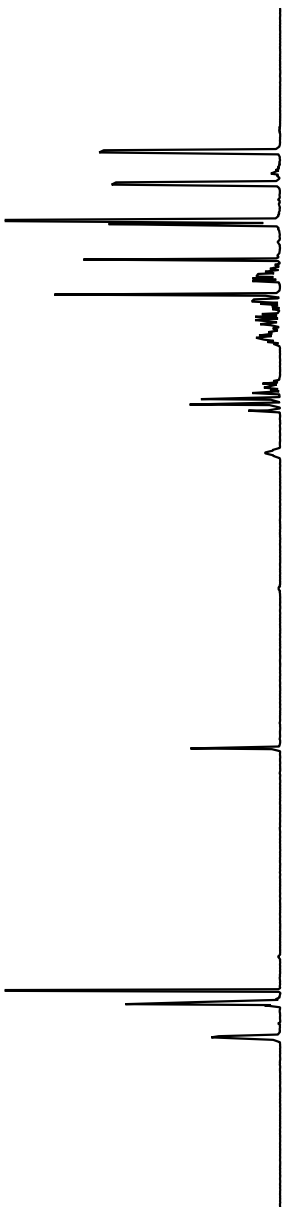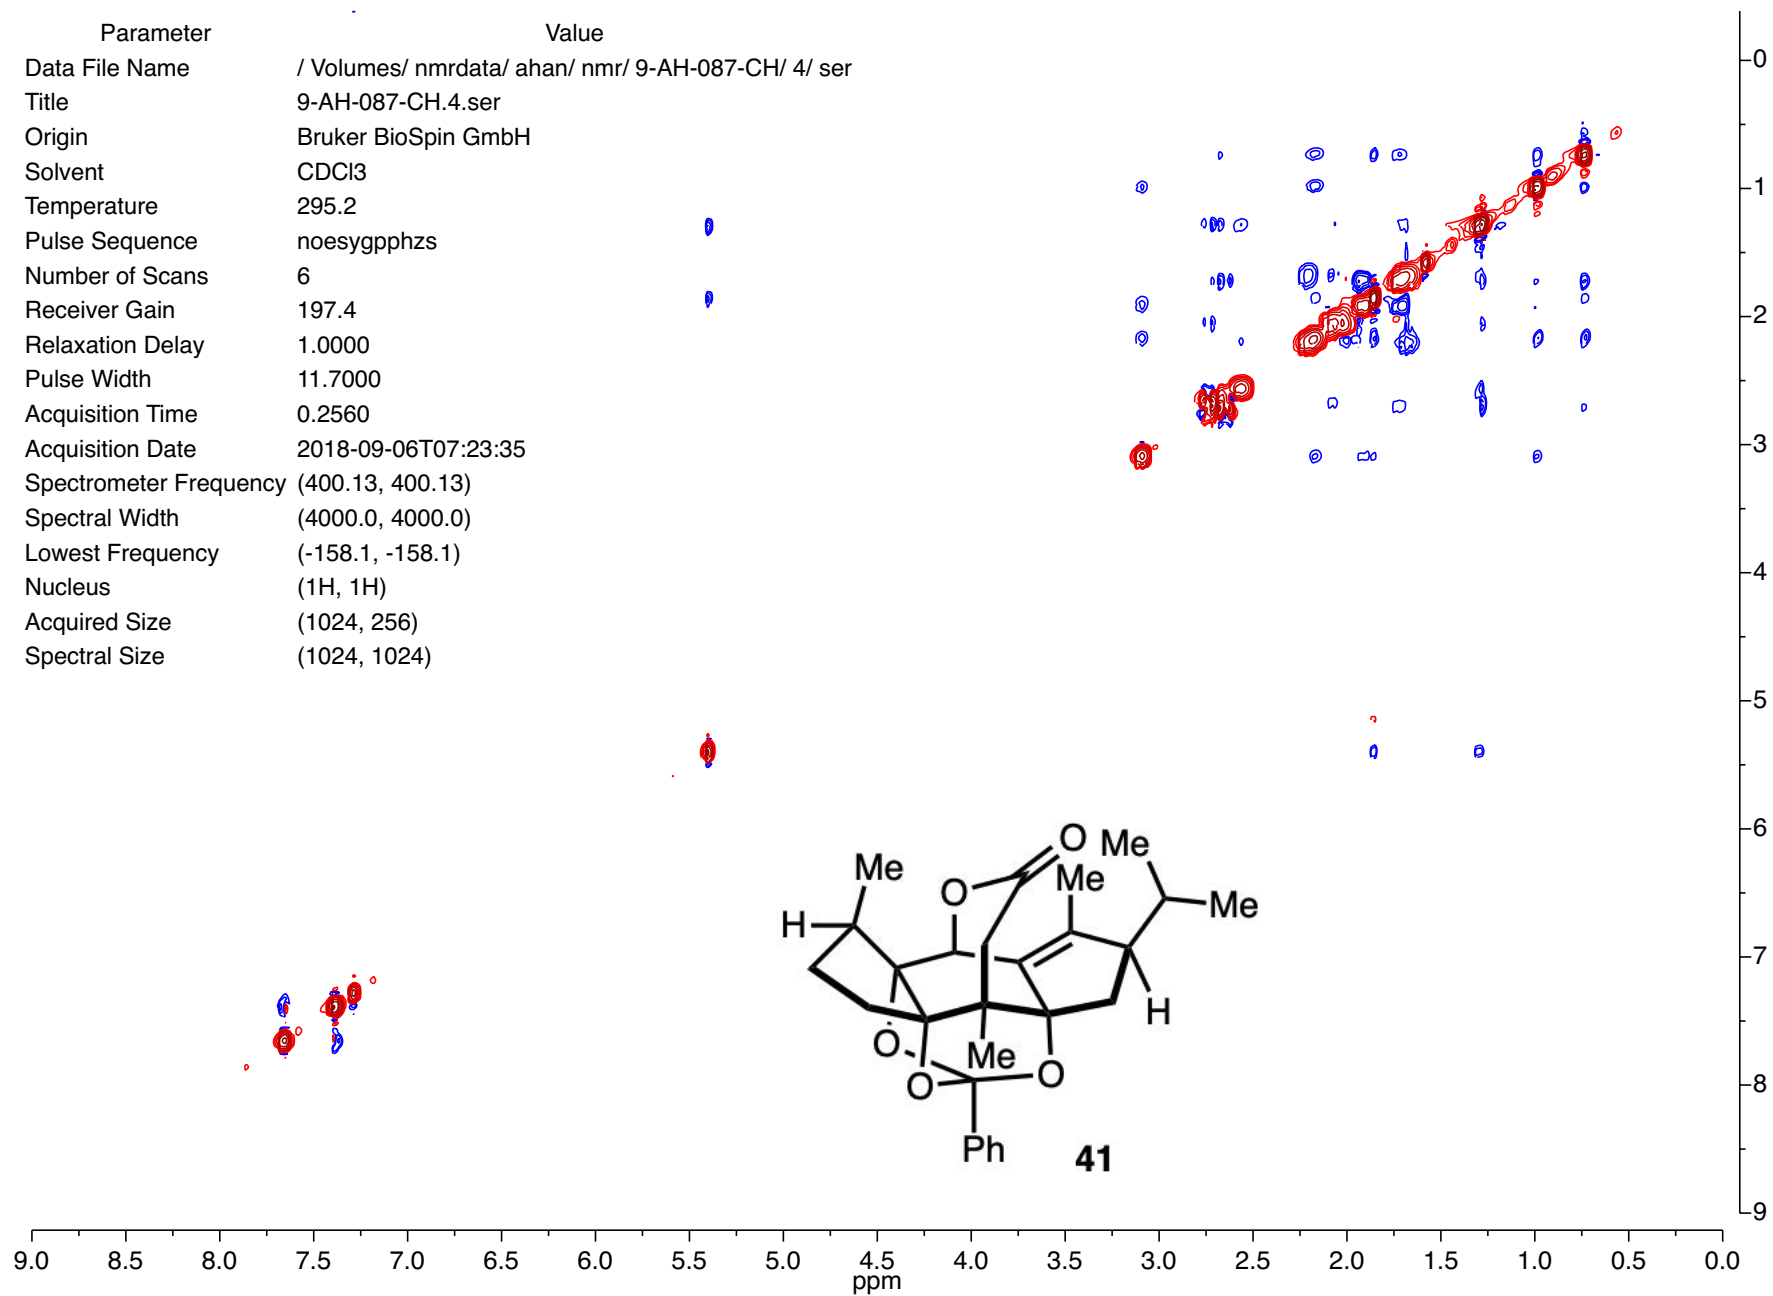



| Parameter              | Value                                              |
|------------------------|----------------------------------------------------|
| Data File Name         | / Volumes/ nmrdata/ ahan/ nmr/ 9-AH-088-CH/ 1/ fid |
| Title                  | 9-AH-088-CH.1.fid                                  |
| Origin                 | Bruker BioSpin GmbH                                |
| Solvent                | C6D6                                               |
| Temperature            | 295.2                                              |
| Pulse Sequence         | zg30                                               |
| Number of Scans        | 1                                                  |
| Receiver Gain          | 176.8                                              |
| Relaxation Delay       | 5.0000                                             |
| Pulse Width            | 11.7000                                            |
| Acquisition Time       | 4.0894                                             |
| Acquisition Date       | 2018-09-06T12:12:19                                |
| Spectrometer Frequency | 400.13                                             |
| Spectral Width         | 8012.8                                             |
| Lowest Frequency       | -1532.8                                            |
| Nucleus                | 1H                                                 |
| Acquired Size          | 32768                                              |
| Spectral Size          | 65536                                              |

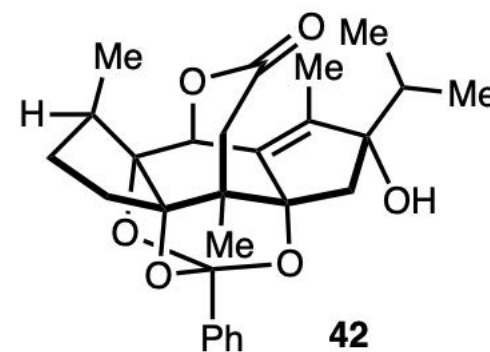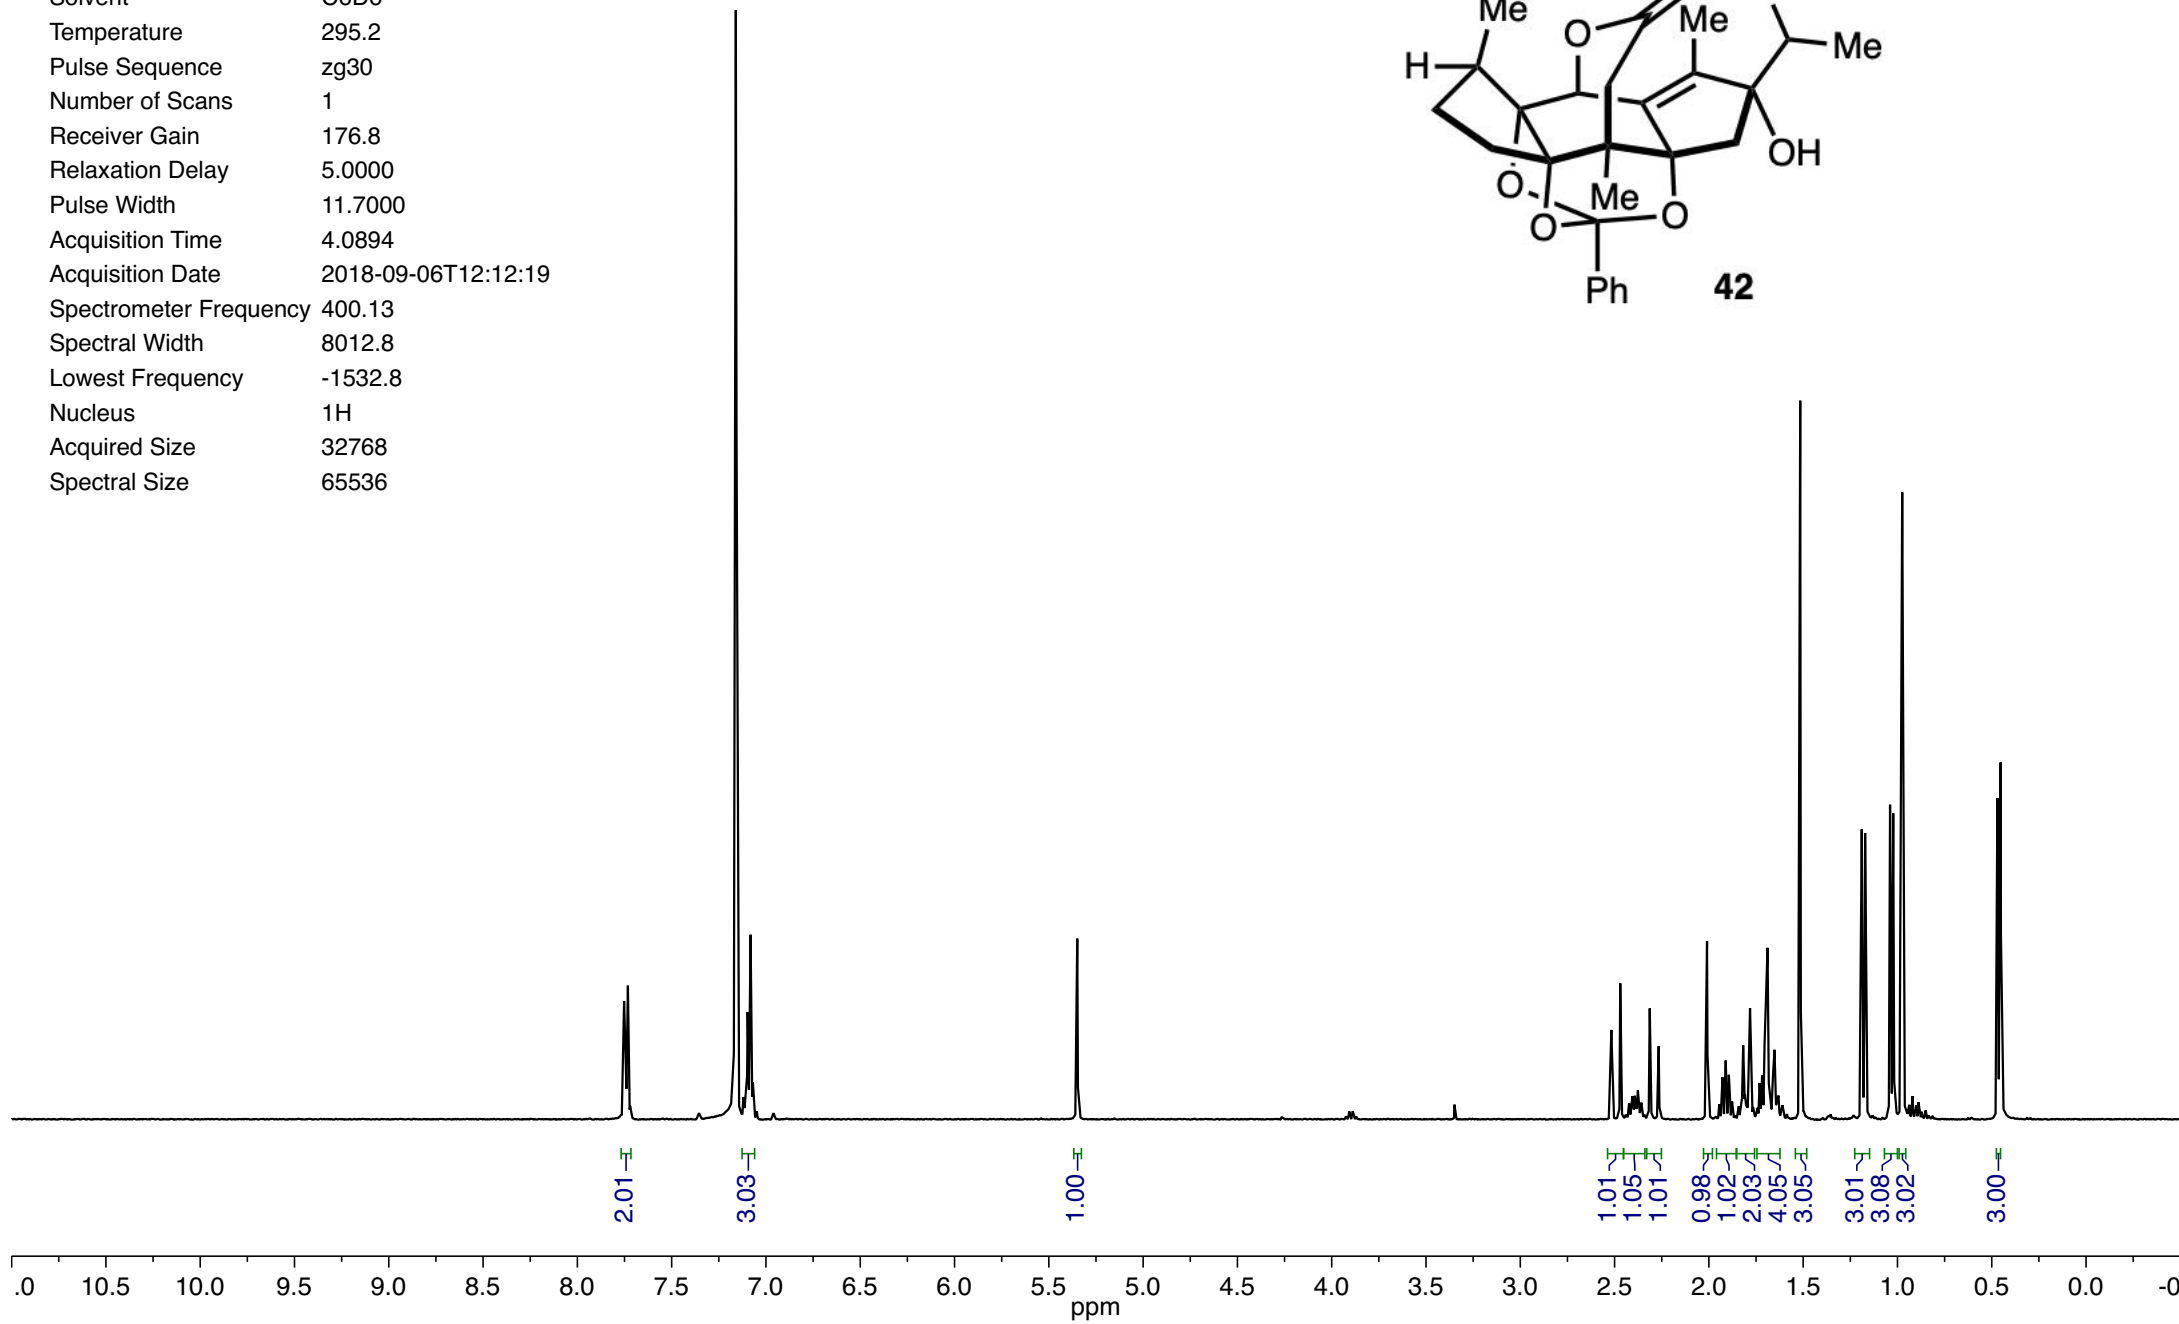

| Parameter              | Value                                        |
|------------------------|----------------------------------------------|
| Data File Name         | /Volumes/nmrdata/ahan/nmr/9-AH-088-CH/ 2/fid |
| Title                  | 9-AH-088-CH.2.fid                            |
| Origin                 | Bruker BioSpin GmbH                          |
| Solvent                | C6D6                                         |
| Temperature            | 295.1                                        |
| Pulse Sequence         | zgpg30                                       |
| Number of Scans        | 1000                                         |
| Receiver Gain          | 55.5                                         |
| Relaxation Delay       | 1.0000                                       |
| Pulse Width            | 10.0000                                      |
| Acquisition Time       | 1.3631                                       |
| Acquisition Date       | 2018-09-06T12:53:53                          |
| Spectrometer Frequency | 100.62                                       |
| Spectral Width         | 24038.5                                      |
| Lowest Frequency       | -1927.3                                      |
| Nucleus                | <sup>13</sup> C                              |
| Acquired Size          | 32768                                        |
| Spectral Size          | 65536                                        |

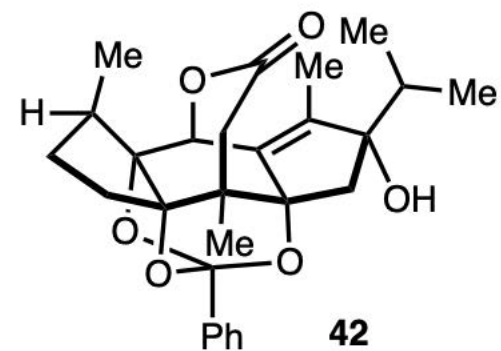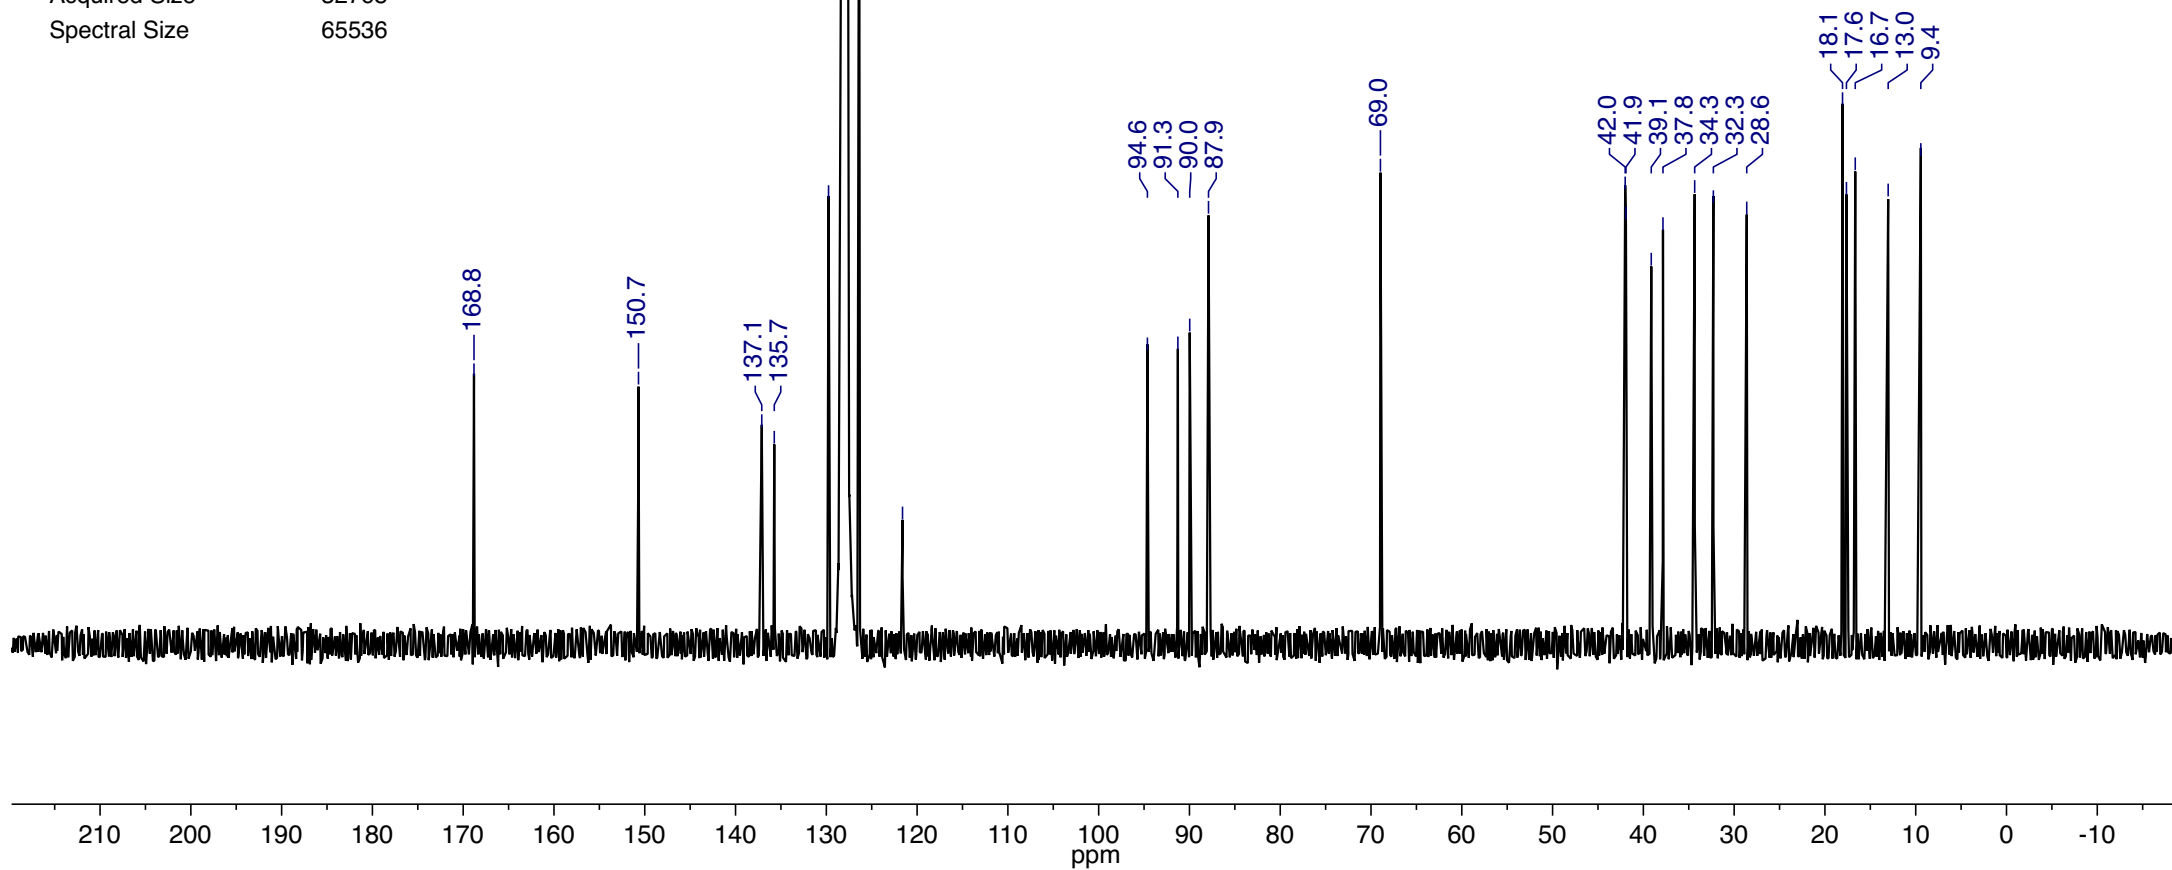

| Parameter              | Value                                                                   |
|------------------------|-------------------------------------------------------------------------|
| Data File Name         | / Volumes/ nmrdata/ ahan/ vnmrsys/ data/ 9-AH-089-CH/ PROTON01.fid/ fid |
| Title                  | PROTON01                                                                |
| Origin                 | Varian                                                                  |
| Solvent                | c6d6                                                                    |
| Temperature            | 25.0                                                                    |
| Pulse Sequence         | s2pul                                                                   |
| Number of Scans        | 4                                                                       |
| Receiver Gain          | 36                                                                      |
| Relaxation Delay       | 5.0000                                                                  |
| Pulse Width            | 5.8000                                                                  |
| Acquisition Time       | 3.0000                                                                  |
| Acquisition Date       | 2018-09-13T07:41:09                                                     |
| Spectrometer Frequency | 499.63                                                                  |
| Spectral Width         | 8000.0                                                                  |
| Lowest Frequency       | -993.3                                                                  |
| Nucleus                | 1H                                                                      |
| Acquired Size          | 24000                                                                   |
| Spectral Size          | 65536                                                                   |

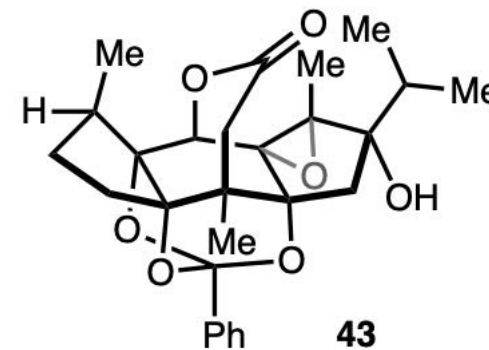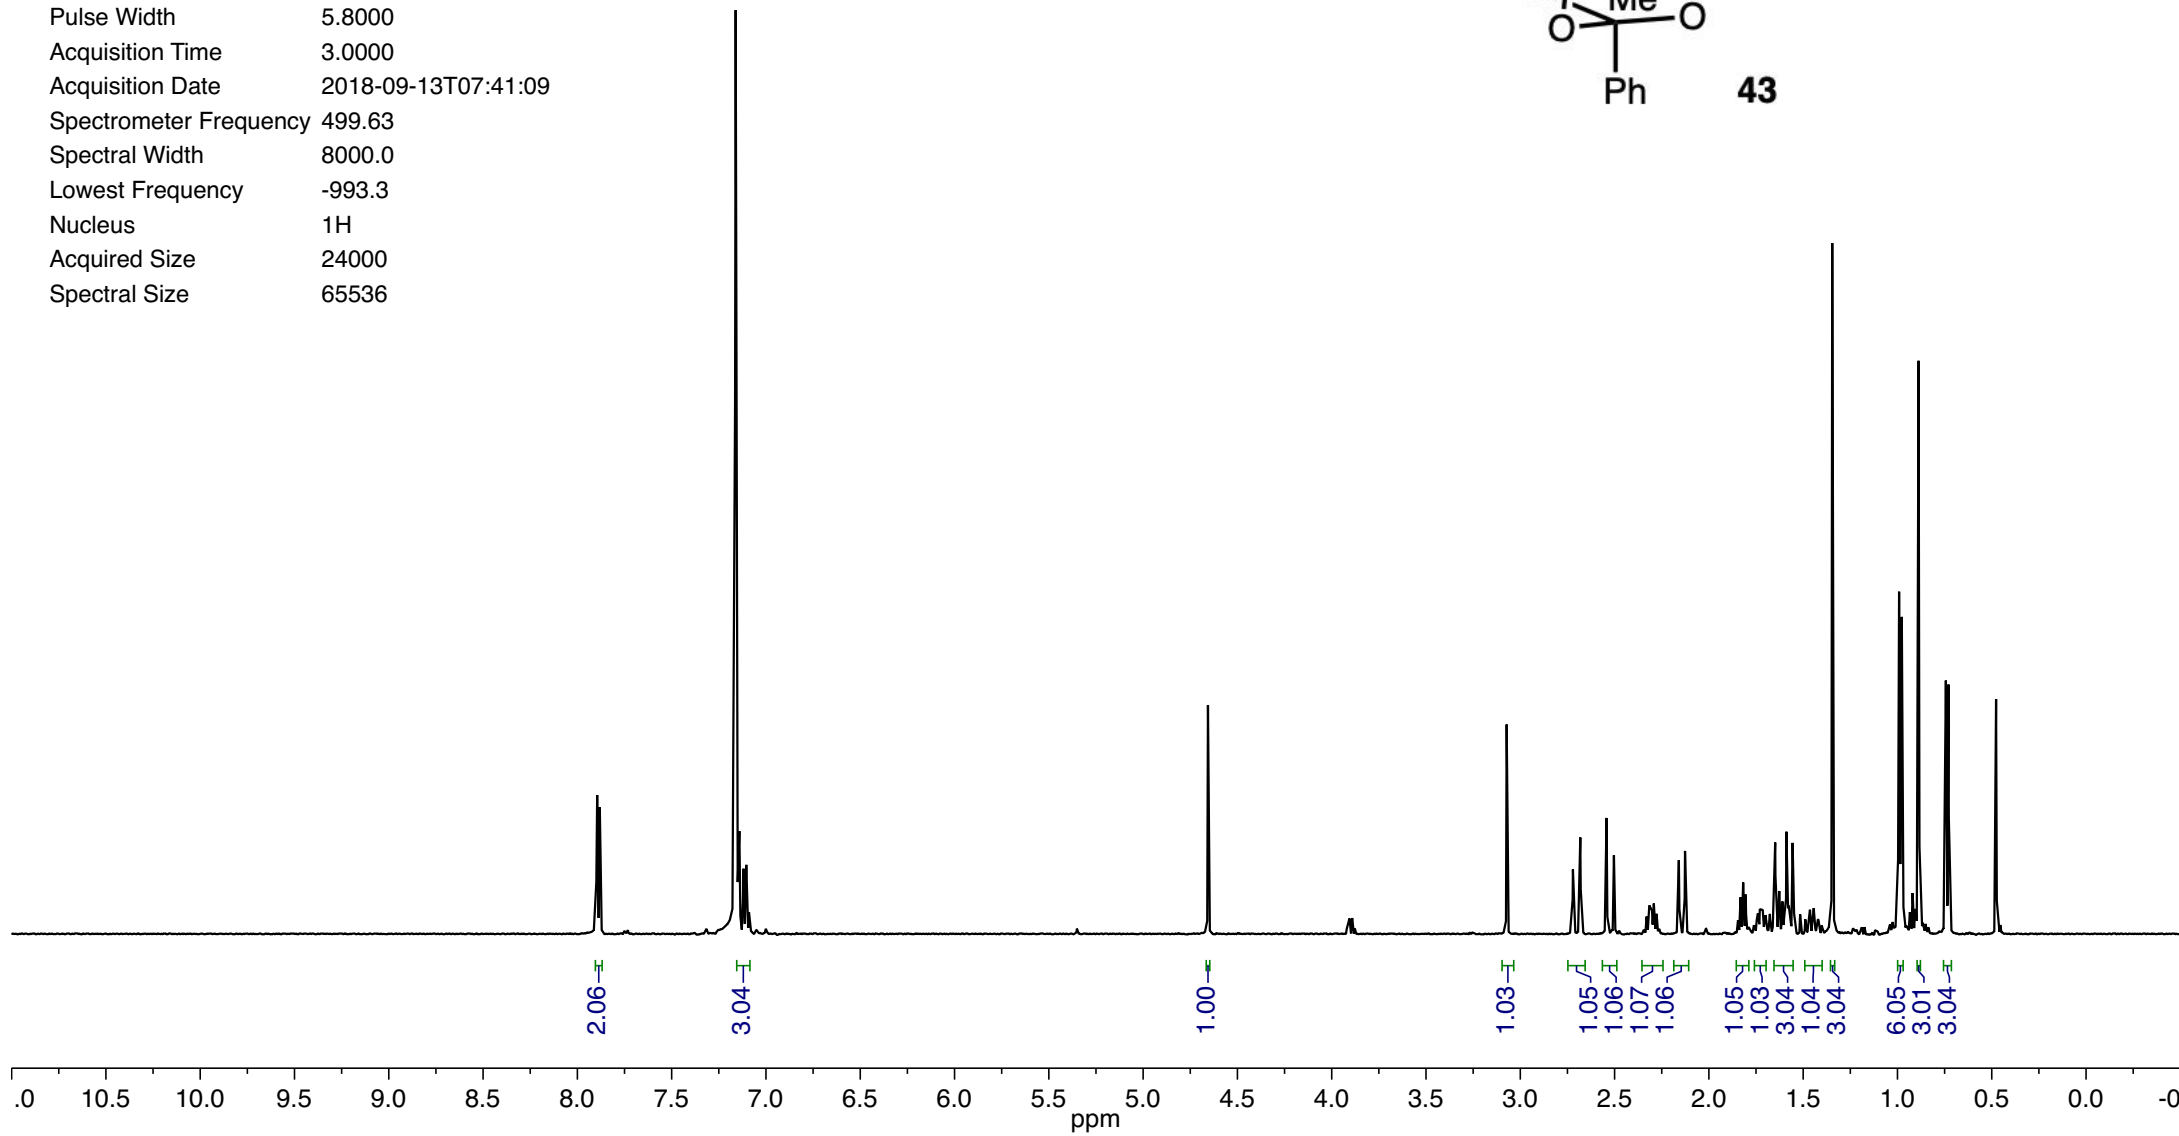

| Parameter              | Value                                       |
|------------------------|---------------------------------------------|
| Data File Name         | /Volumes/nmrdata/ahan/nmr/9-AH-089-CH/1/fid |
| Title                  | 9-AH-089-CH.1.fid                           |
| Origin                 | Bruker BioSpin GmbH                         |
| Solvent                | C6D6                                        |
| Temperature            | 295.2                                       |
| Pulse Sequence         | zgpg30                                      |
| Number of Scans        | 1000                                        |
| Receiver Gain          | 55.5                                        |
| Relaxation Delay       | 1.0000                                      |
| Pulse Width            | 10.0000                                     |
| Acquisition Time       | 1.3631                                      |
| Acquisition Date       | 2018-09-07T16:45:46                         |
| Spectrometer Frequency | 100.62                                      |
| Spectral Width         | 24038.5                                     |
| Lowest Frequency       | -1927.3                                     |
| Nucleus                | <sup>13</sup> C                             |
| Acquired Size          | 32768                                       |
| Spectral Size          | 65536                                       |

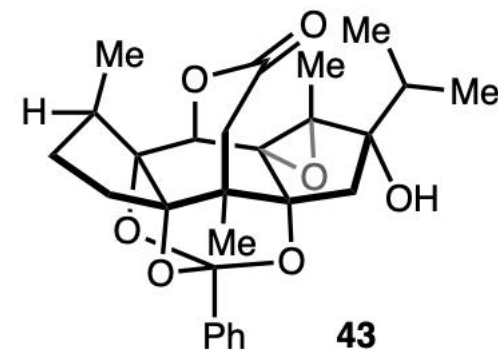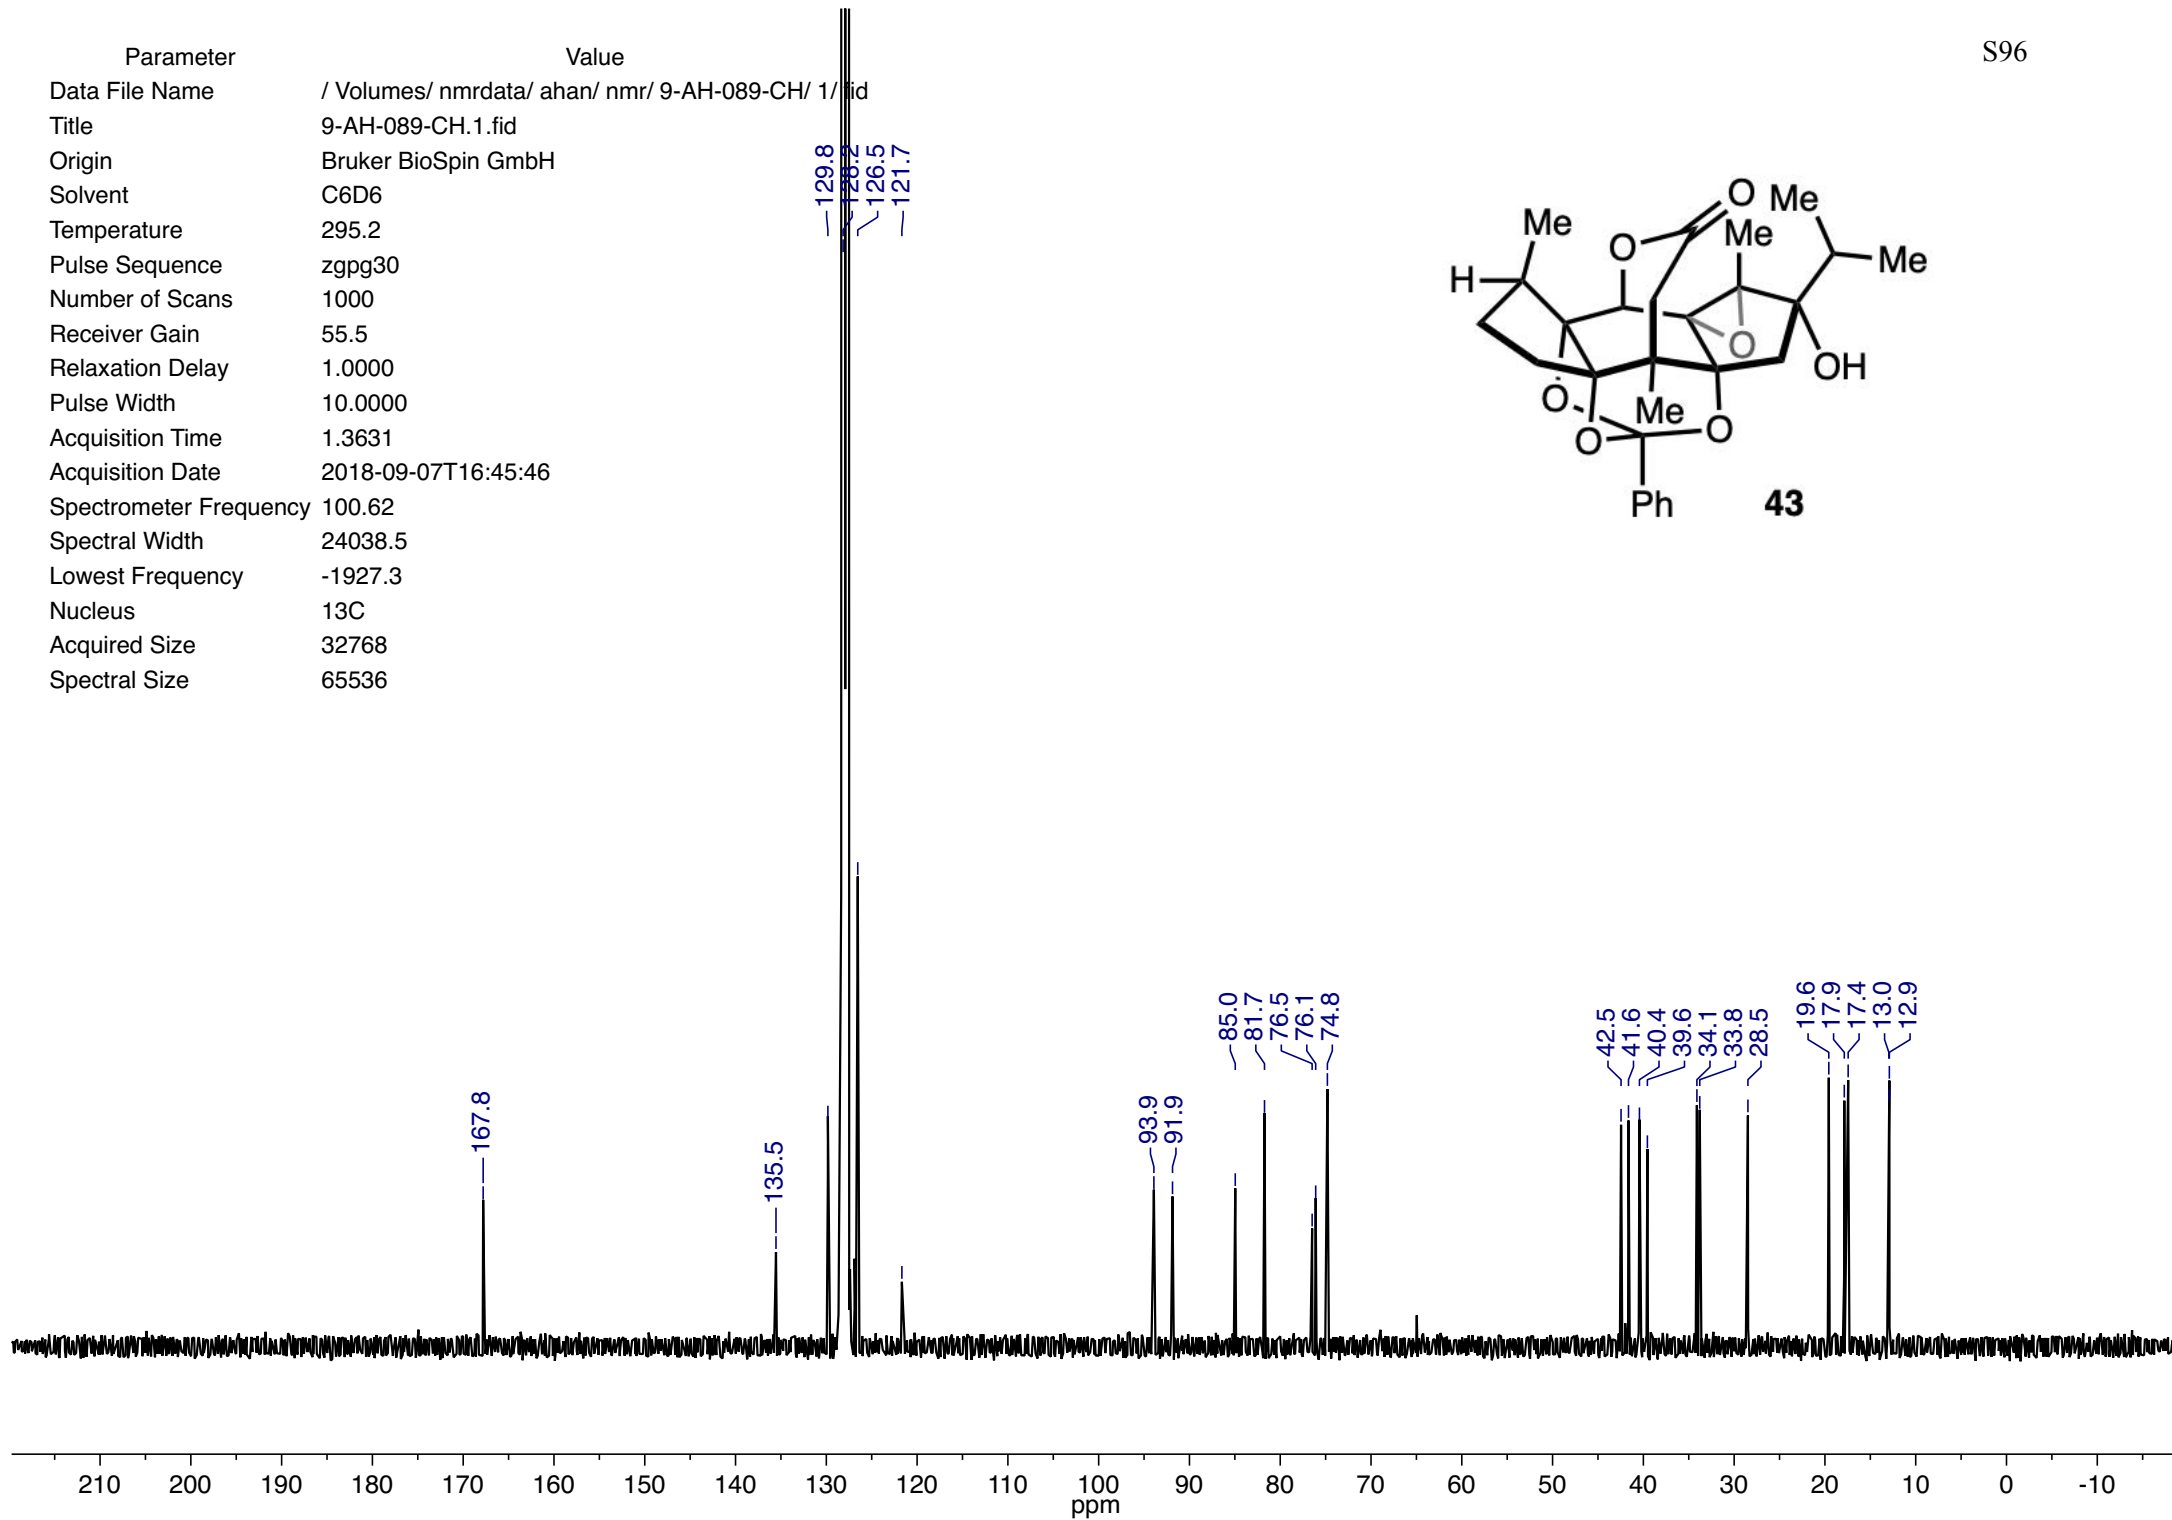

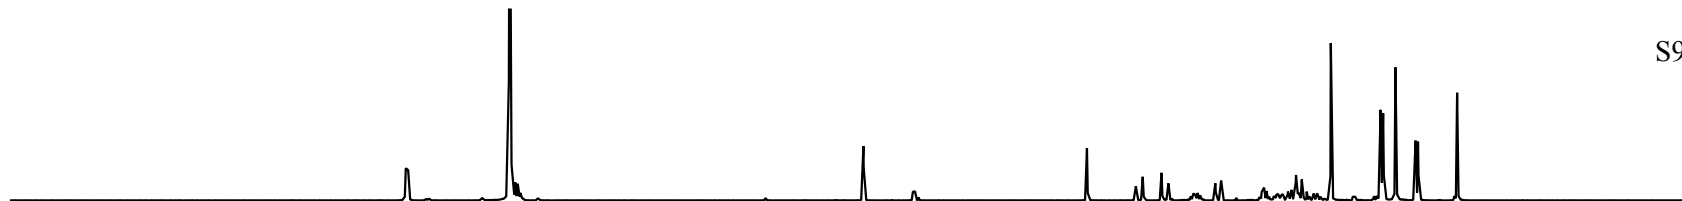

| Parameter              | Value                                              |
|------------------------|----------------------------------------------------|
| Data File Name         | / Volumes/ nmrdata/ ahan/ nmr/ 9-AH-089-CH/ 4/ ser |
| Title                  | 9-AH-089-CH.4.ser                                  |
| Origin                 | Bruker BioSpin GmbH                                |
| Solvent                | C6D6                                               |
| Temperature            | 295.2                                              |
| Pulse Sequence         | hsqcedetgpsisp2.4                                  |
| Number of Scans        | 4                                                  |
| Receiver Gain          | 197.4                                              |
| Relaxation Delay       | 1.0000                                             |
| Pulse Width            | 11.7000                                            |
| Acquisition Time       | 0.2135                                             |
| Acquisition Date       | 2018-09-07T17:27:07                                |
| Spectrometer Frequency | (400.13, 100.62)                                   |
| Spectral Width         | (4795.4, 16611.3)                                  |
| Lowest Frequency       | (-517.1, -1261.7)                                  |
| Nucleus                | (1H, 13C)                                          |
| Acquired Size          | (1024, 180)                                        |
| Spectral Size          | (1024, 1024)                                       |

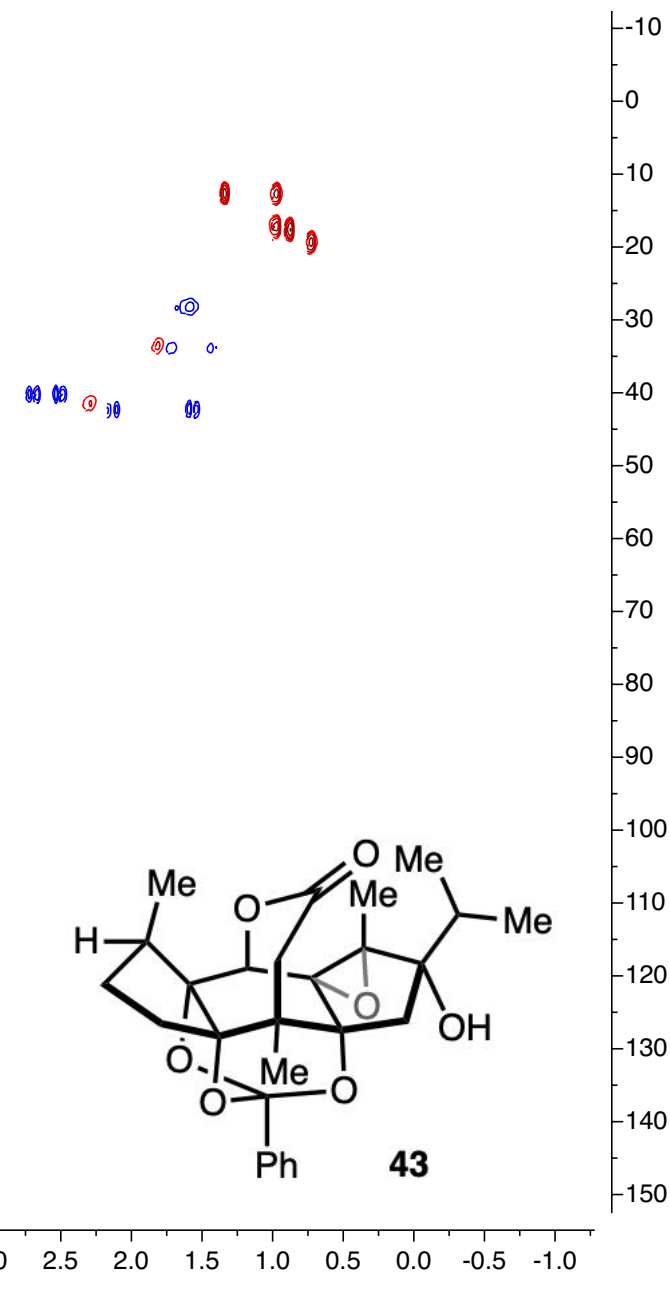

10.5 10.0 9.5 9.0 8.5 8.0 7.5 7.0 6.5 6.0 5.5 5.0 4.5 4.0 3.5 3.0 2.5 2.0 1.5 1.0 0.5 0.0 -0.5 -1.0  
ppm

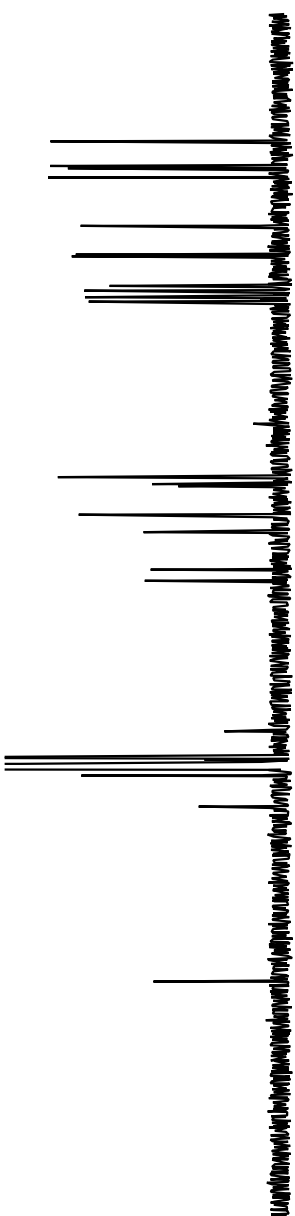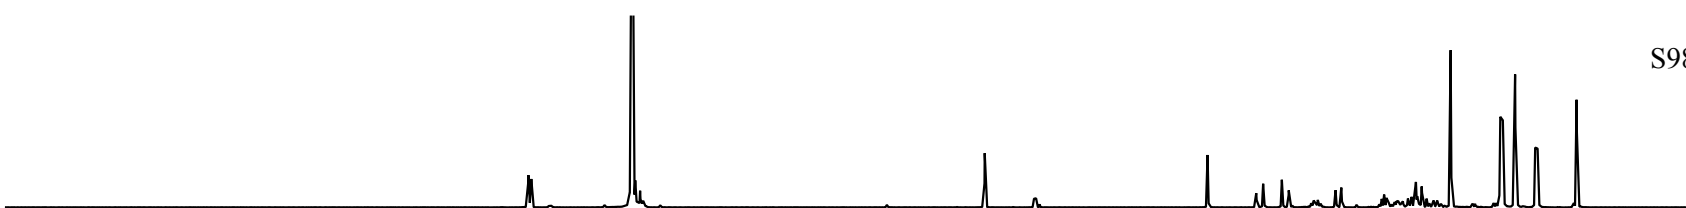

| Parameter              | Value                                              |
|------------------------|----------------------------------------------------|
| Data File Name         | / Volumes/ nmrdata/ ahan/ nmr/ 9-AH-089-CH/ 5/ ser |
| Title                  | 9-AH-089-CH.5.ser                                  |
| Origin                 | Bruker BioSpin GmbH                                |
| Solvent                | C6D6                                               |
| Temperature            | 295.2                                              |
| Pulse Sequence         | hmbcctgpl3nd                                       |
| Number of Scans        | 4                                                  |
| Receiver Gain          | 197.4                                              |
| Relaxation Delay       | 1.0000                                             |
| Pulse Width            | 11.7000                                            |
| Acquisition Time       | 0.4260                                             |
| Acquisition Date       | 2018-09-07T17:42:45                                |
| Spectrometer Frequency | (400.13, 100.62)                                   |
| Spectral Width         | (4807.7, 22321.4)                                  |
| Lowest Frequency       | (-163.1, -1115.4)                                  |
| Nucleus                | (1H, 13C)                                          |
| Acquired Size          | (2048, 150)                                        |
| Spectral Size          | (2048, 1024)                                       |

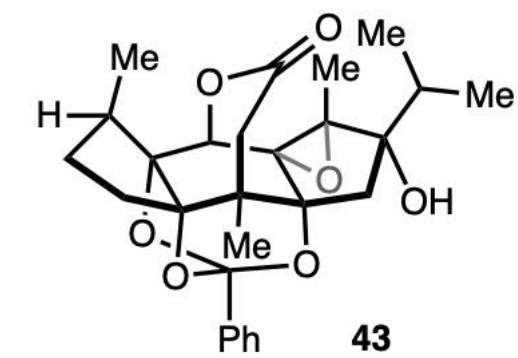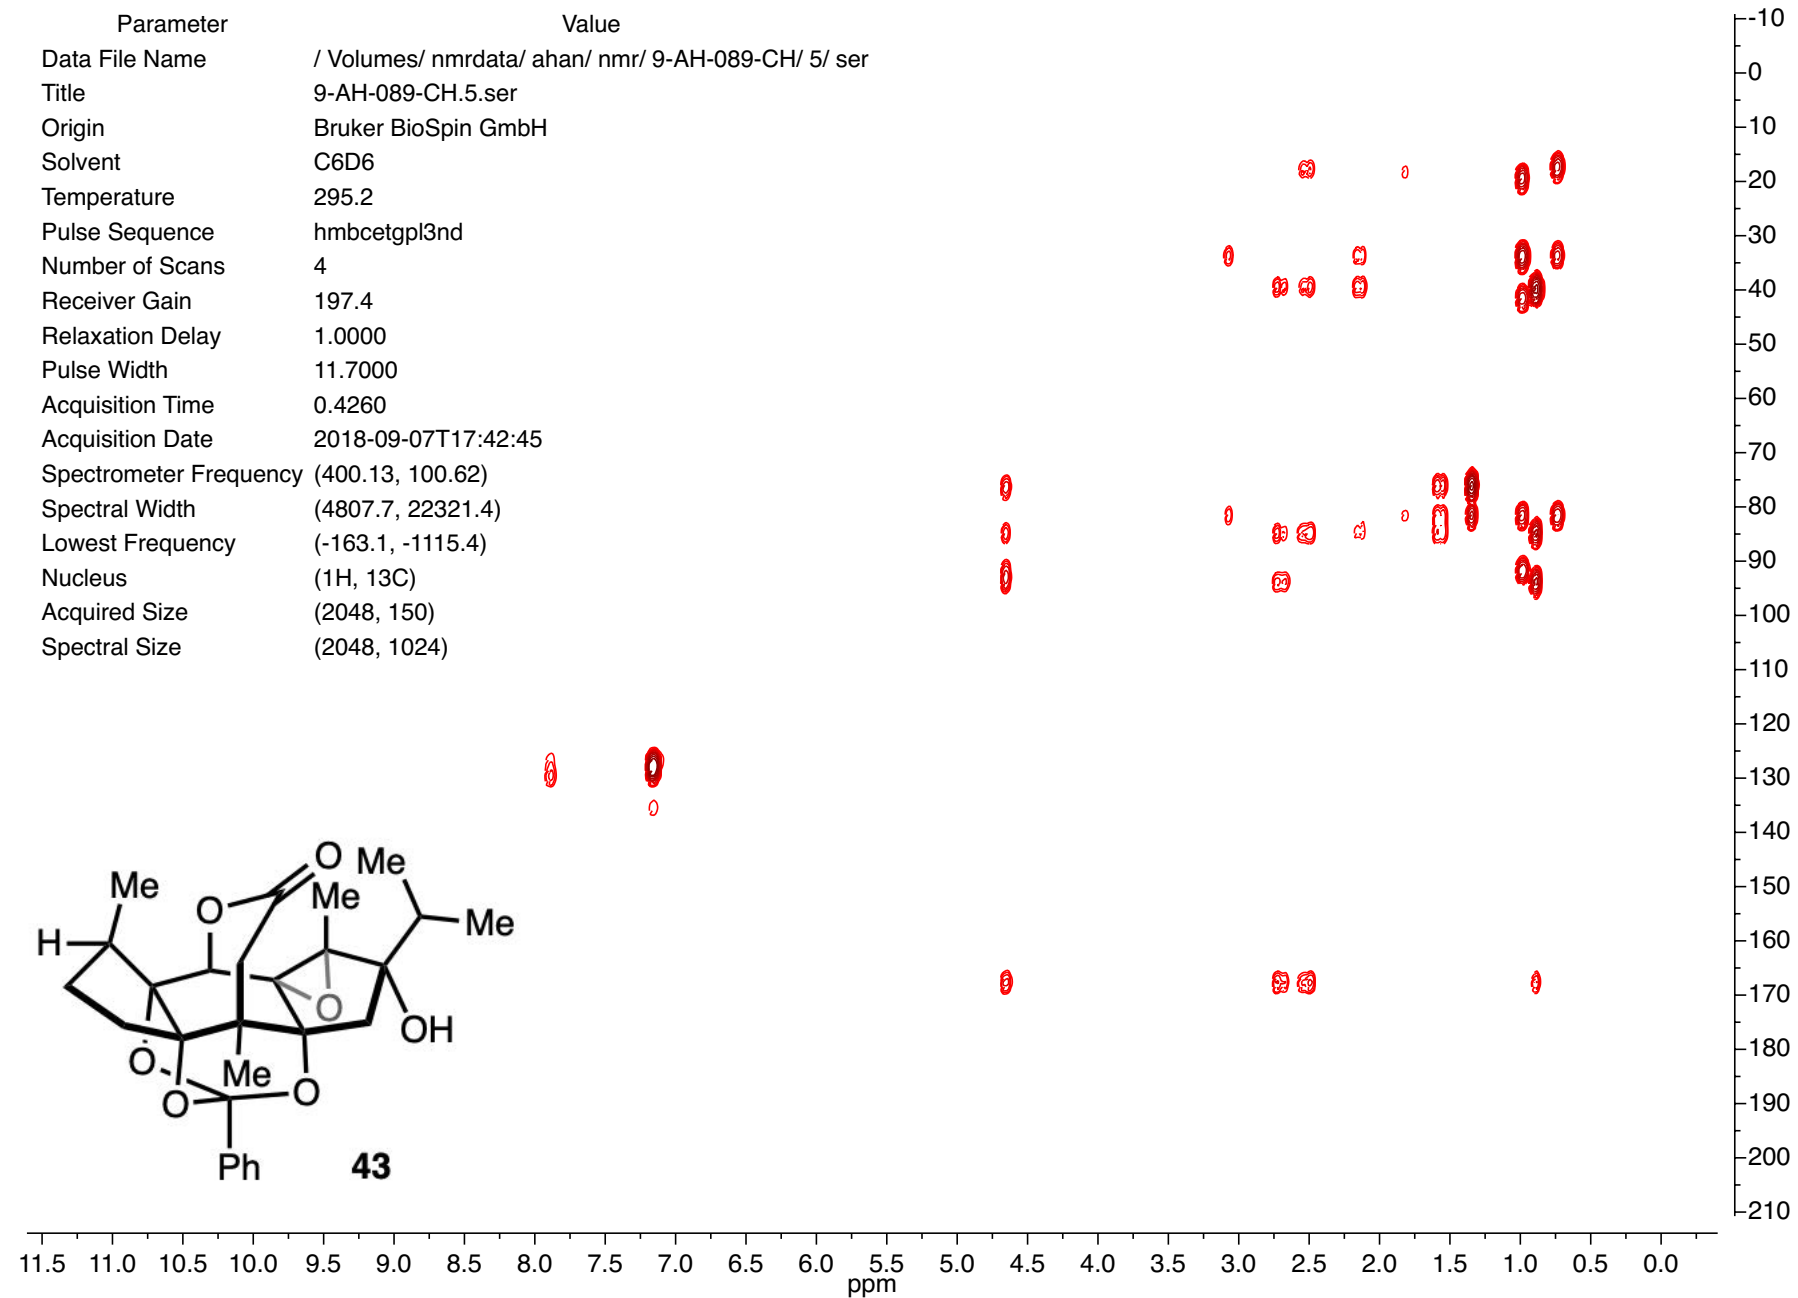

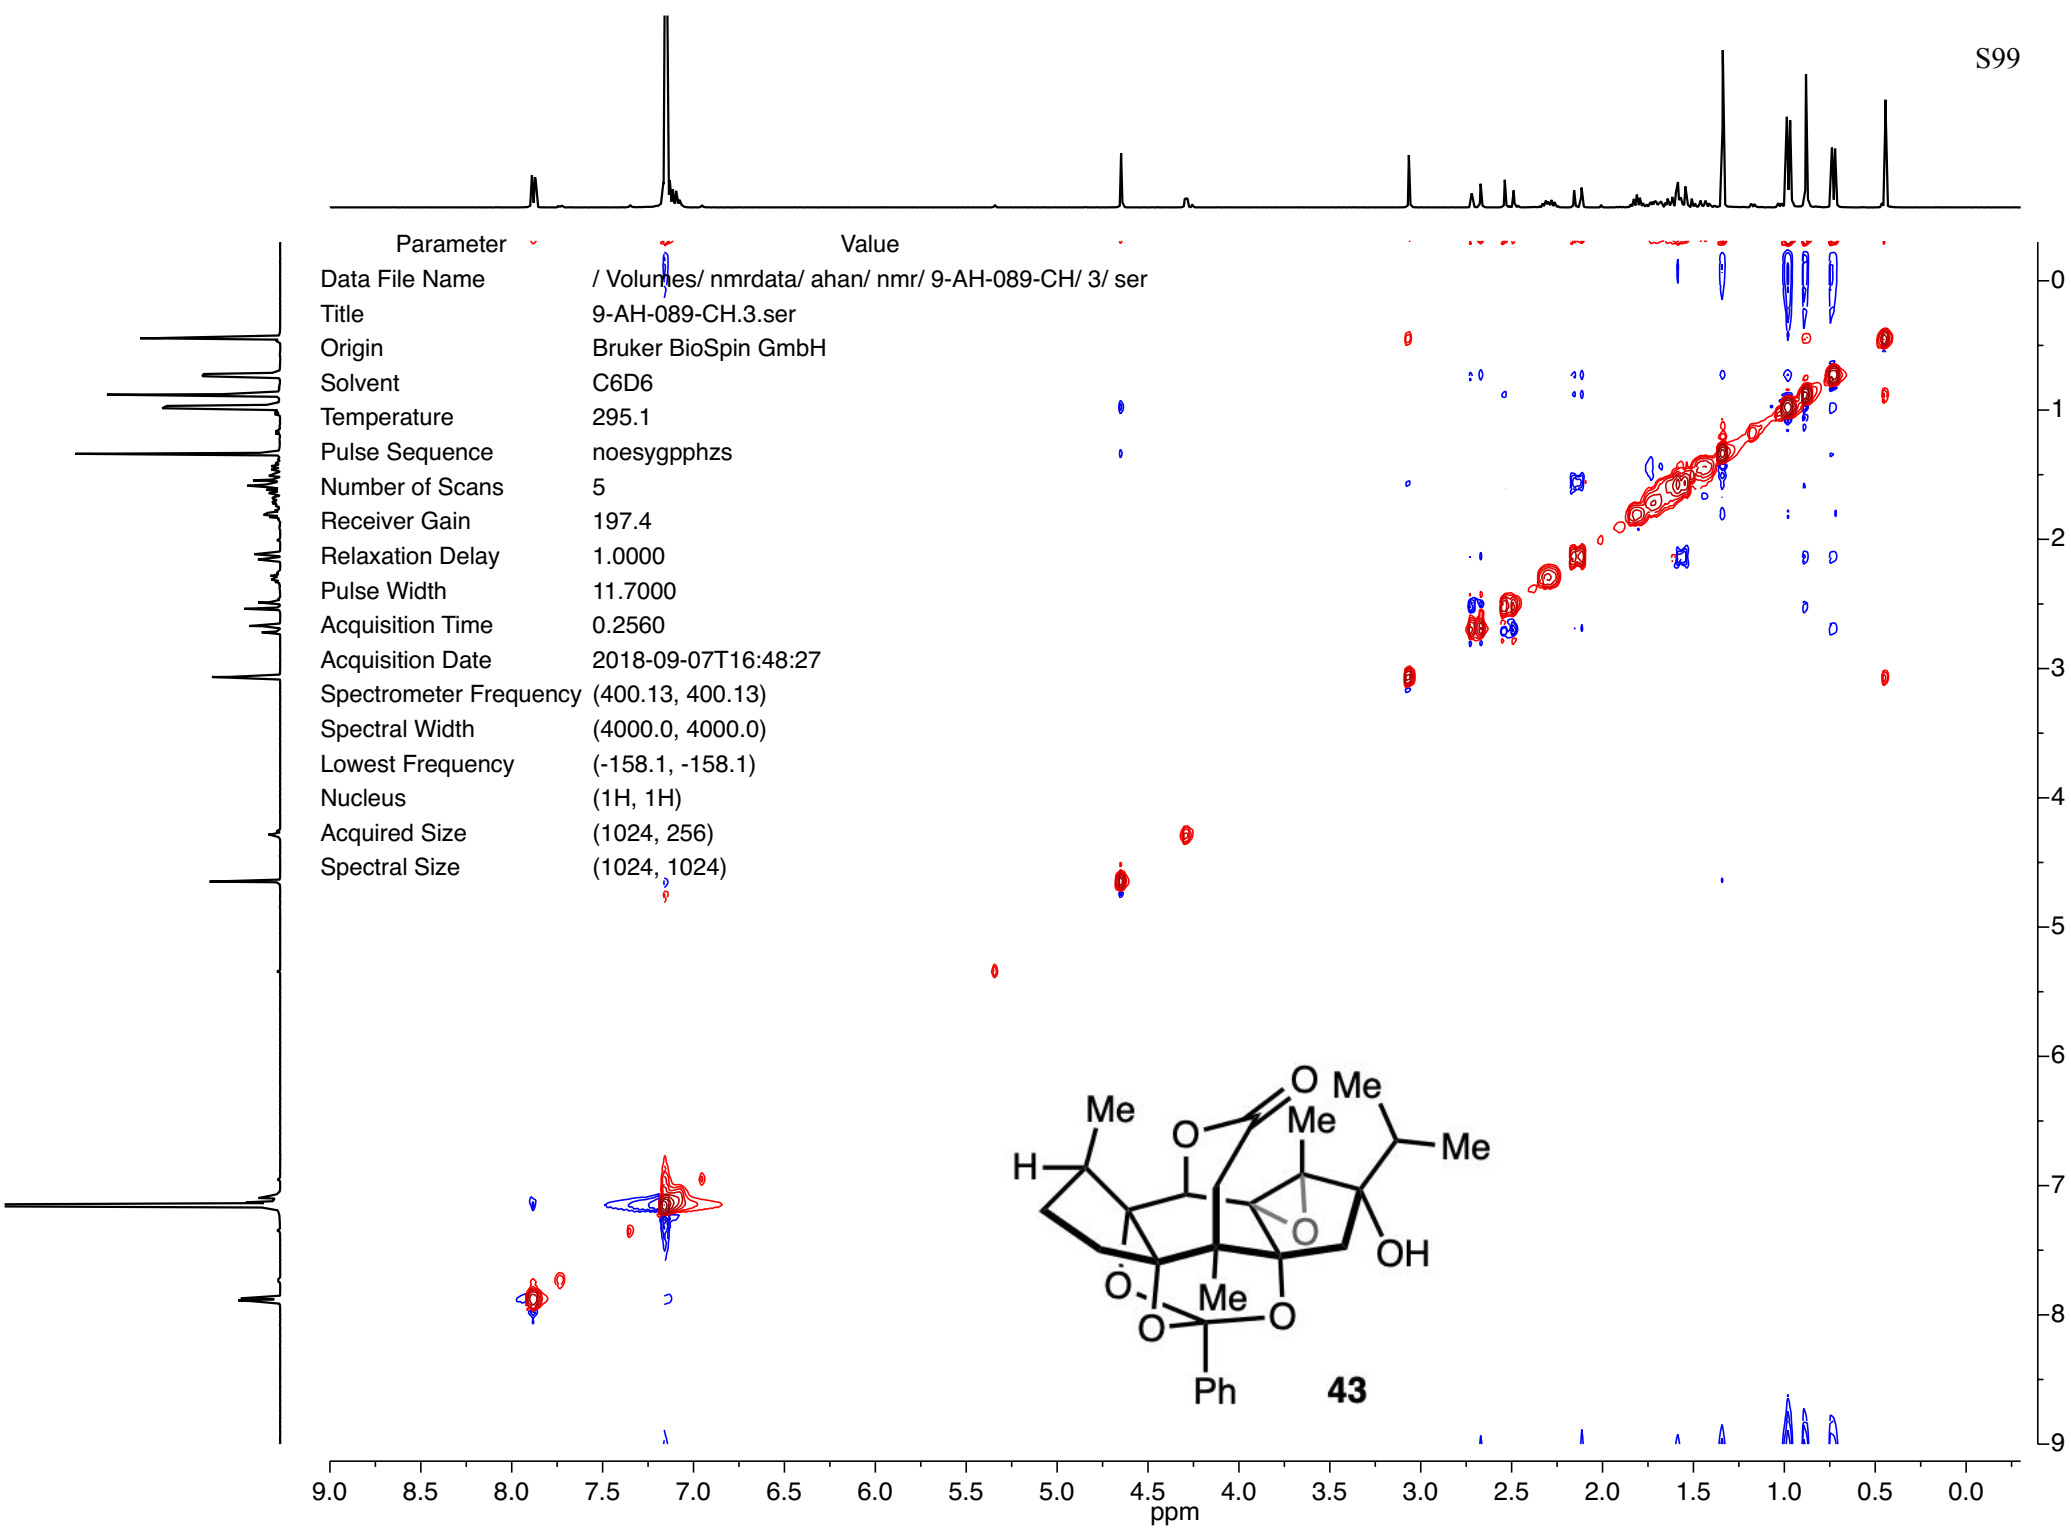

| Parameter              | Value                                         |
|------------------------|-----------------------------------------------|
| Data File Name         | /Volumes/nmrdata/ahan/nmr/9-AH-092-CH/ 1/ fid |
| Title                  | 9-AH-092-CH.1.fid                             |
| Origin                 | Bruker BioSpin GmbH                           |
| Solvent                | CDCl3                                         |
| Temperature            | 295.2                                         |
| Pulse Sequence         | zg30                                          |
| Number of Scans        | 8                                             |
| Receiver Gain          | 197.4                                         |
| Relaxation Delay       | 5.0000                                        |
| Pulse Width            | 11.7000                                       |
| Acquisition Time       | 4.0894                                        |
| Acquisition Date       | 2018-09-11T14:54:04                           |
| Spectrometer Frequency | 400.13                                        |
| Spectral Width         | 8012.8                                        |
| Lowest Frequency       | -1545.6                                       |
| Nucleus                | 1H                                            |
| Acquired Size          | 32768                                         |
| Spectral Size          | 65536                                         |

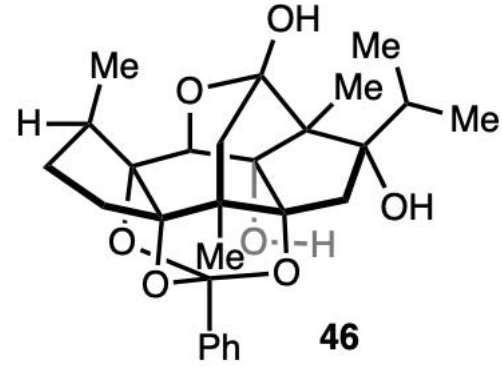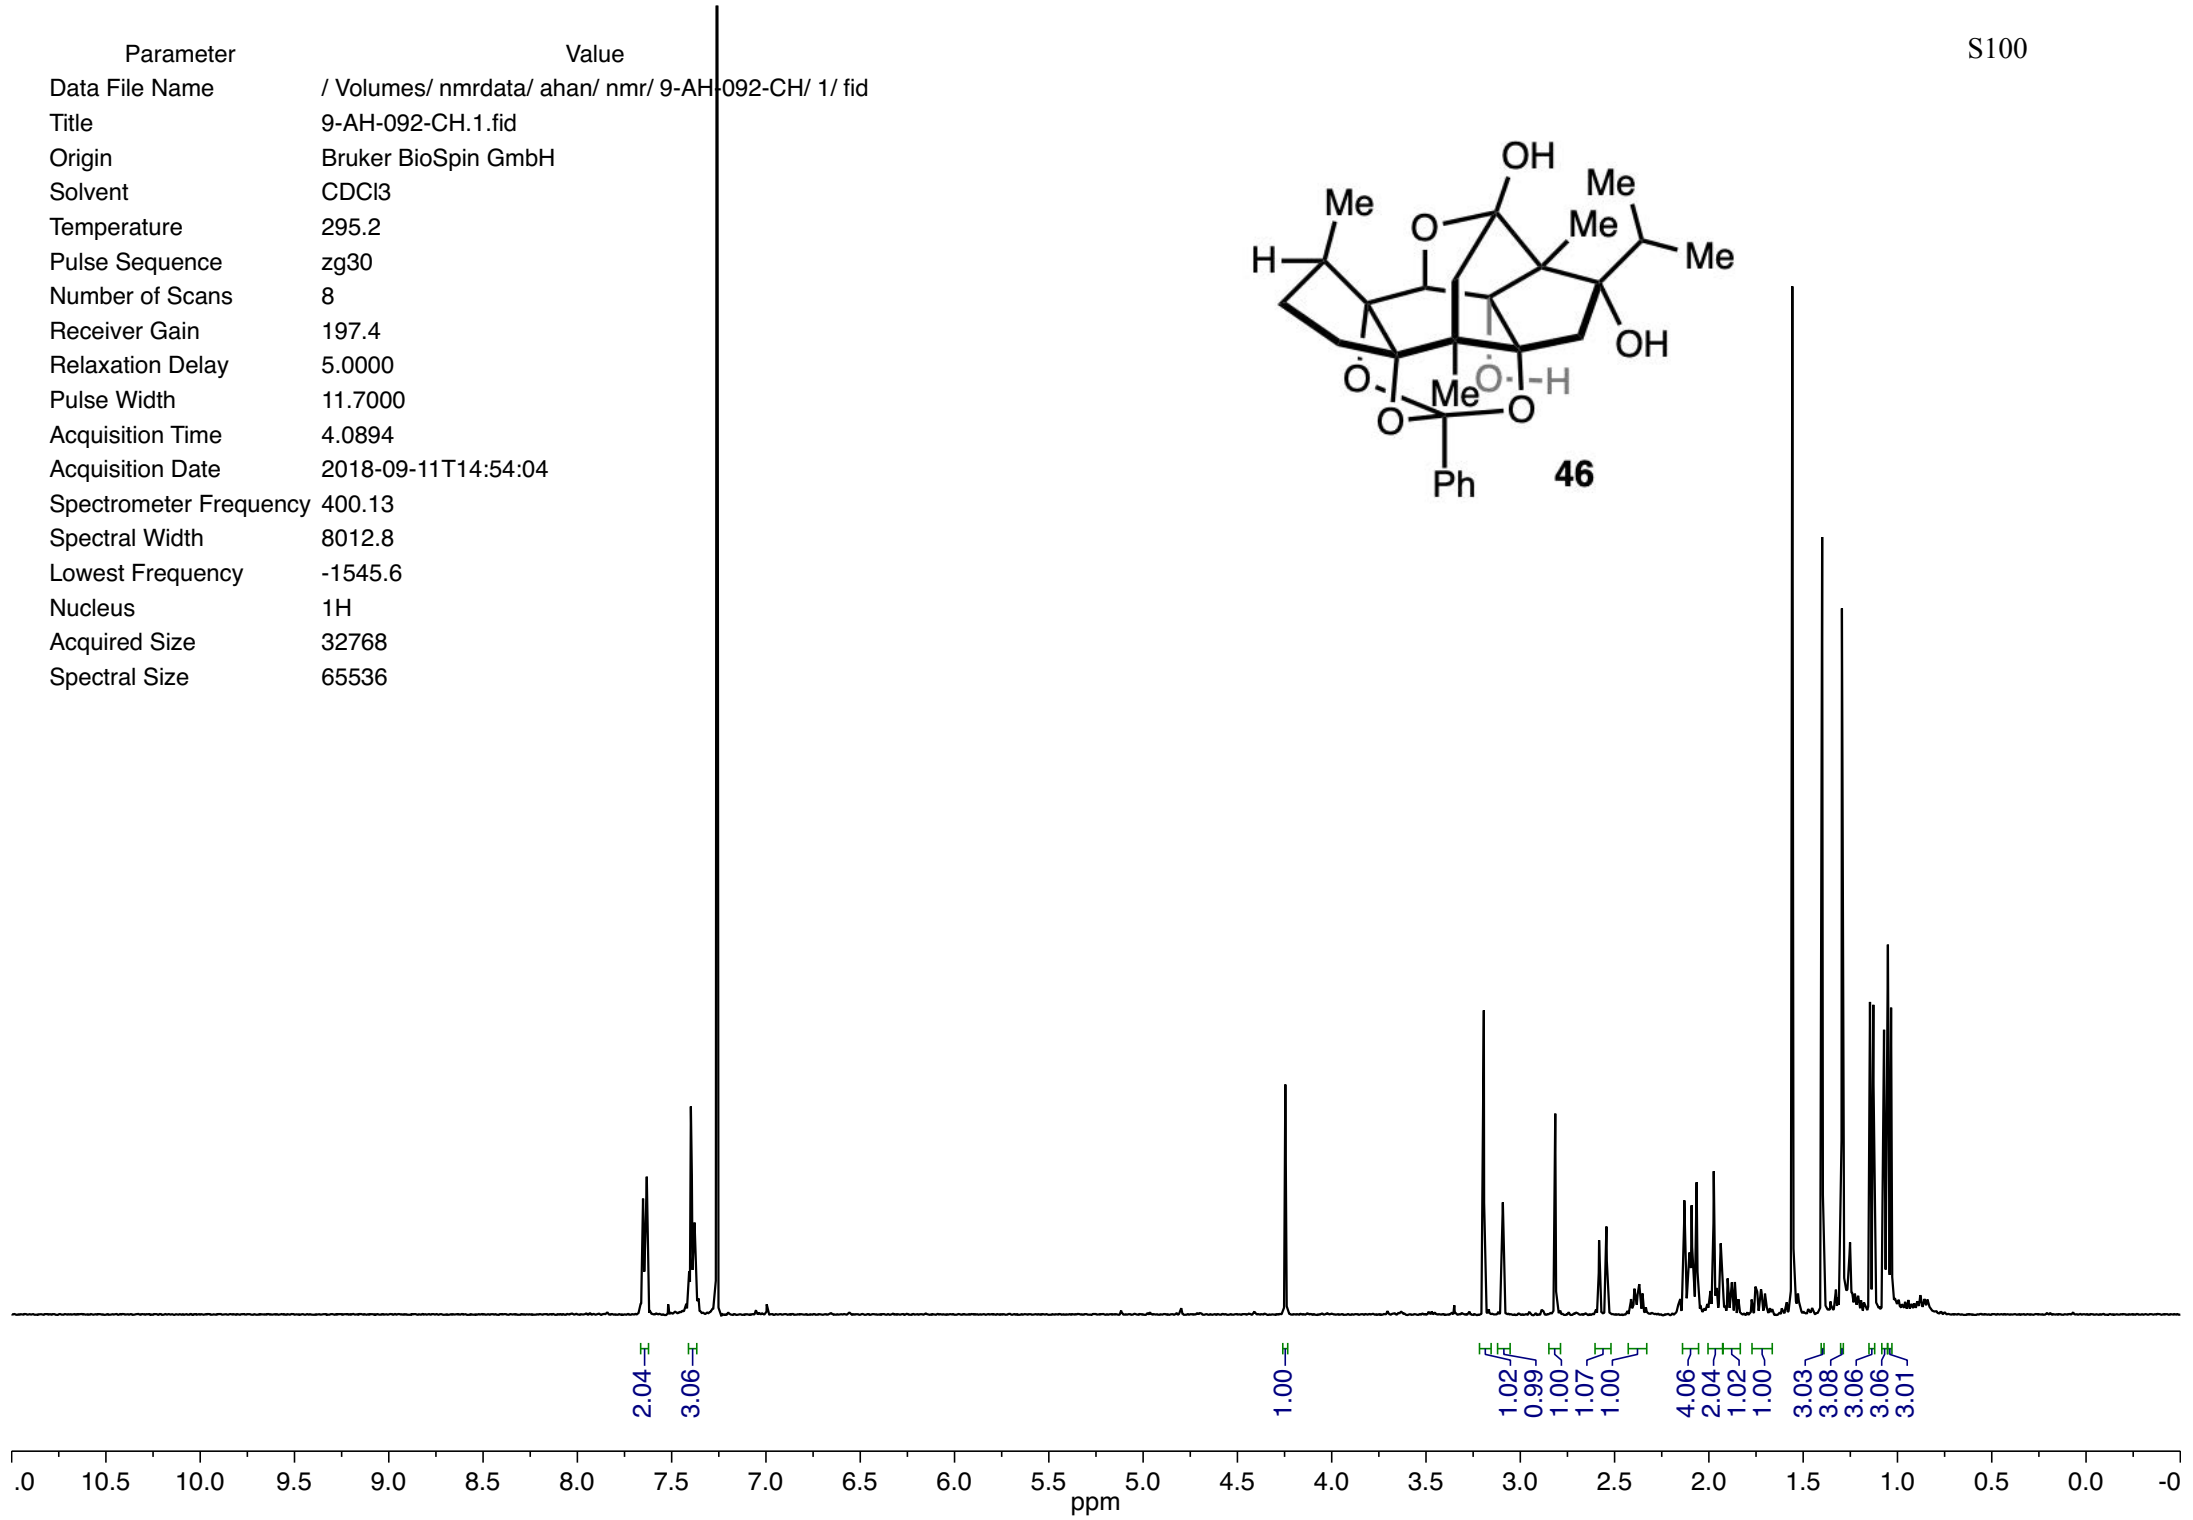



| Parameter              | Value                                              |
|------------------------|----------------------------------------------------|
| Data File Name         | / Volumes/ nmrdata/ ahan/ nmr/ 9-AH-092-CH/ 2/ fid |
| Title                  | 9-AH-092-CH.2.fid                                  |
| Origin                 | Bruker BioSpin GmbH                                |
| Solvent                | CDCl3                                              |
| Temperature            | 295.2                                              |
| Pulse Sequence         | zgpg30                                             |
| Number of Scans        | 1105                                               |
| Receiver Gain          | 64.2                                               |
| Relaxation Delay       | 1.0000                                             |
| Pulse Width            | 10.0000                                            |
| Acquisition Time       | 1.3631                                             |
| Acquisition Date       | 2018-09-11T15:40:00                                |
| Spectrometer Frequency | 100.62                                             |
| Spectral Width         | 24038.5                                            |
| Lowest Frequency       | -1960.9                                            |
| Nucleus                | 13C                                                |
| Acquired Size          | 32768                                              |
| Spectral Size          | 65536                                              |

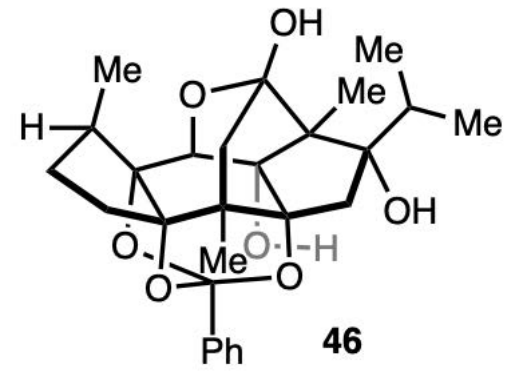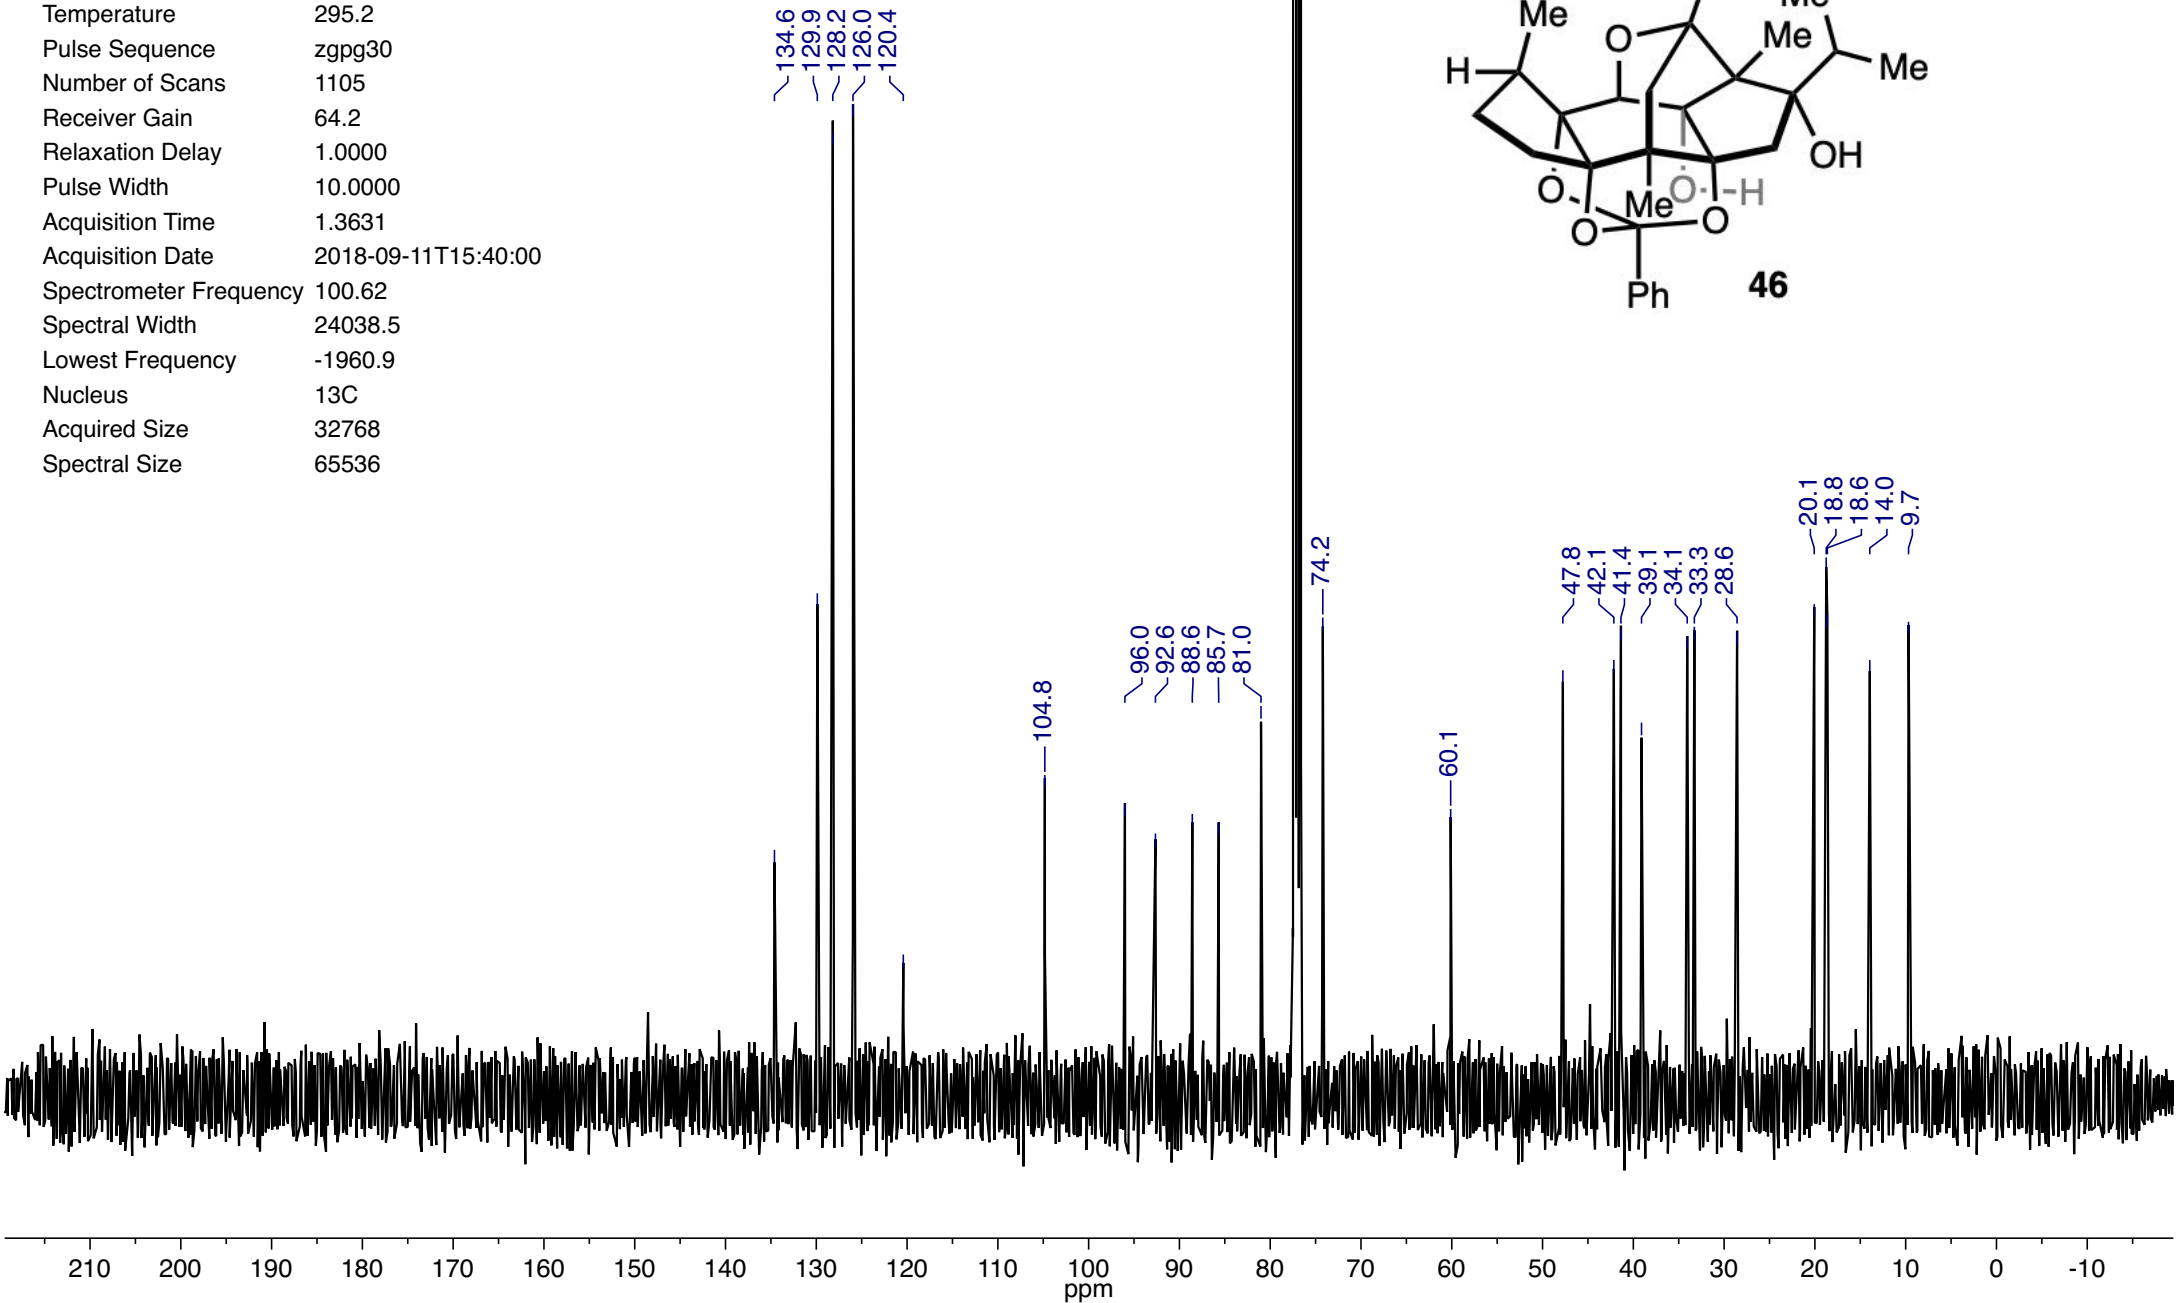

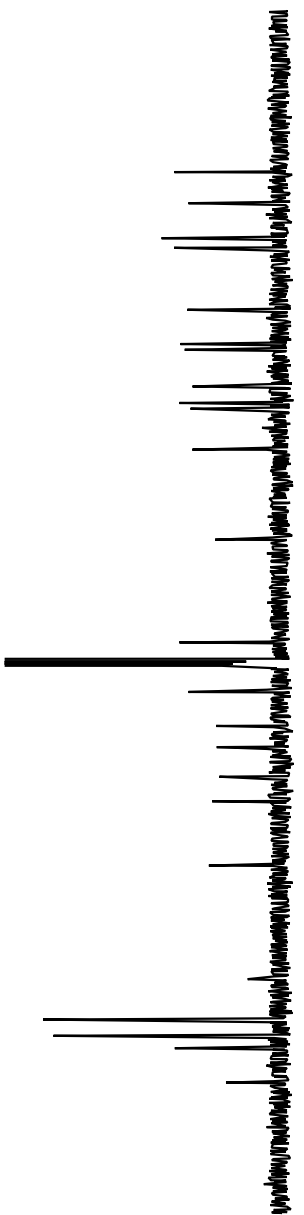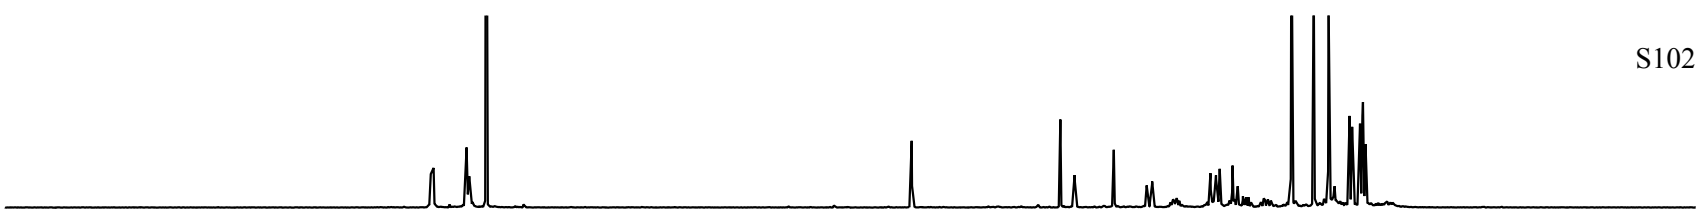

| Parameter              | Value                                              |
|------------------------|----------------------------------------------------|
| Data File Name         | / Volumes/ nmrdata/ ahan/ nmr/ 9-AH-092-CH/ 4/ ser |
| Title                  | 9-AH-092-CH.4.ser                                  |
| Origin                 | Bruker BioSpin GmbH                                |
| Solvent                | CDCl3                                              |
| Temperature            | 295.1                                              |
| Pulse Sequence         | hsqcetgpcisp2.4                                    |
| Number of Scans        | 6                                                  |
| Receiver Gain          | 197.4                                              |
| Relaxation Delay       | 1.0000                                             |
| Pulse Width            | 11.7000                                            |
| Acquisition Time       | 0.2135                                             |
| Acquisition Date       | 2018-09-11T15:42:27                                |
| Spectrometer Frequency | (400.13, 100.62)                                   |
| Spectral Width         | (4795.4, 16611.3)                                  |
| Lowest Frequency       | (-517.1, -1262.8)                                  |
| Nucleus                | (1H, 13C)                                          |
| Acquired Size          | (1024, 180)                                        |
| Spectral Size          | (1024, 1024)                                       |

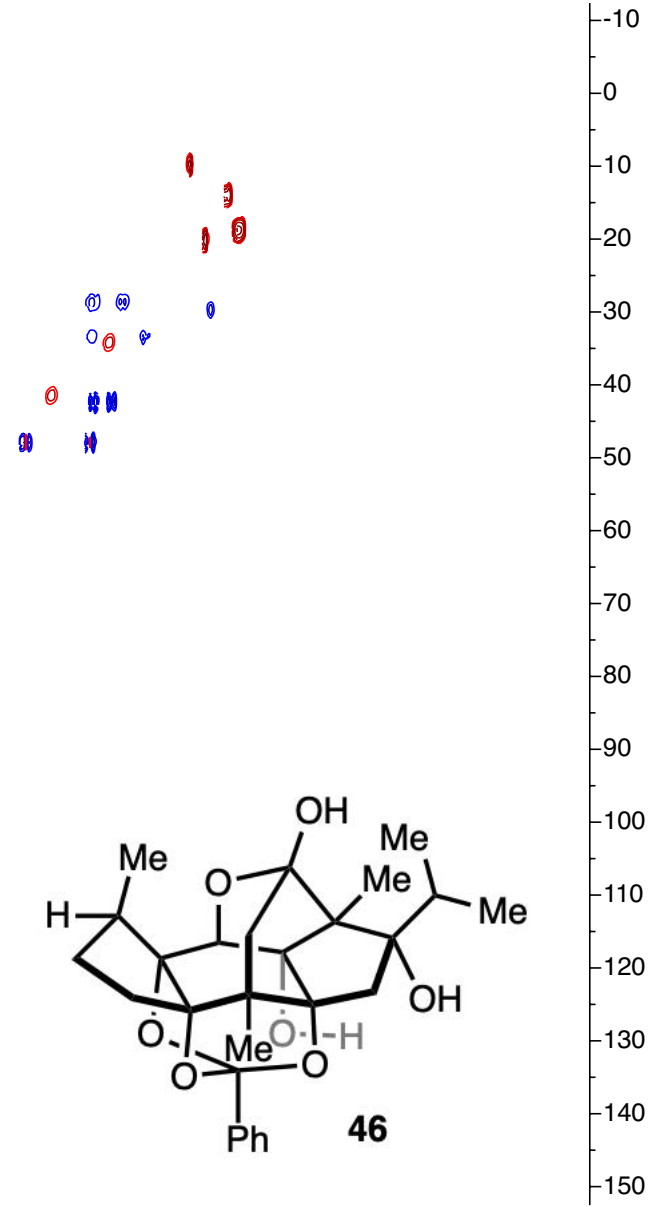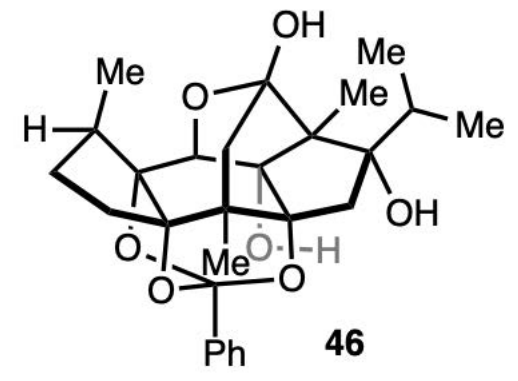

10.5 10.0 9.5 9.0 8.5 8.0 7.5 7.0 6.5 6.0 5.5 5.0 4.5 4.0 3.5 3.0 2.5 2.0 1.5 1.0 0.5 0.0 -0.5 -1.0  
ppm

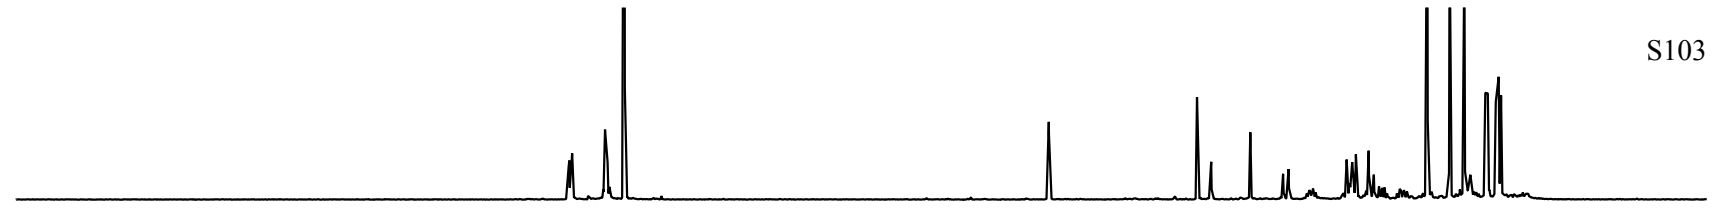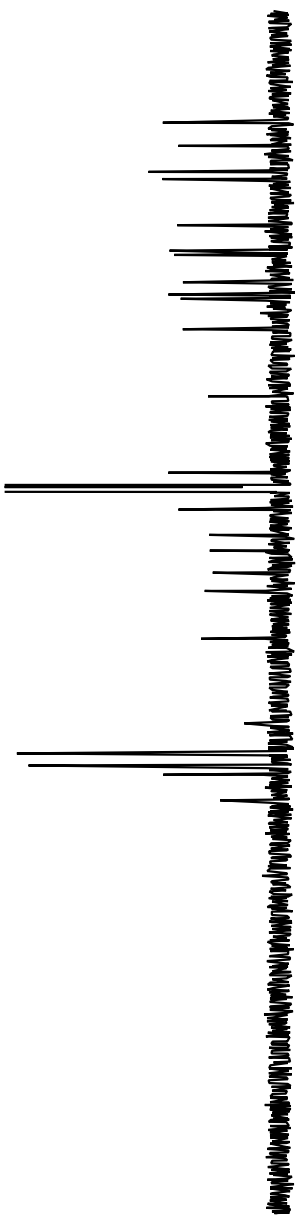

| Parameter              | Value                                              |
|------------------------|----------------------------------------------------|
| Data File Name         | / Volumes/ nmrdata/ ahan/ nmr/ 9-AH-092-CH/ 5/ ser |
| Title                  | 9-AH-092-CH.5.ser                                  |
| Origin                 | Bruker BioSpin GmbH                                |
| Solvent                | CDCl3                                              |
| Temperature            | 295.2                                              |
| Pulse Sequence         | hmbcetgpl3nd                                       |
| Number of Scans        | 6                                                  |
| Receiver Gain          | 197.4                                              |
| Relaxation Delay       | 1.0000                                             |
| Pulse Width            | 11.7000                                            |
| Acquisition Time       | 0.4260                                             |
| Acquisition Date       | 2018-09-11T16:05:36                                |
| Spectrometer Frequency | (400.13, 100.62)                                   |
| Spectral Width         | (4807.7, 22321.4)                                  |
| Lowest Frequency       | (-163.1, -1116.4)                                  |
| Nucleus                | (1H, 13C)                                          |
| Acquired Size          | (2048, 178)                                        |
| Spectral Size          | (2048, 1024)                                       |

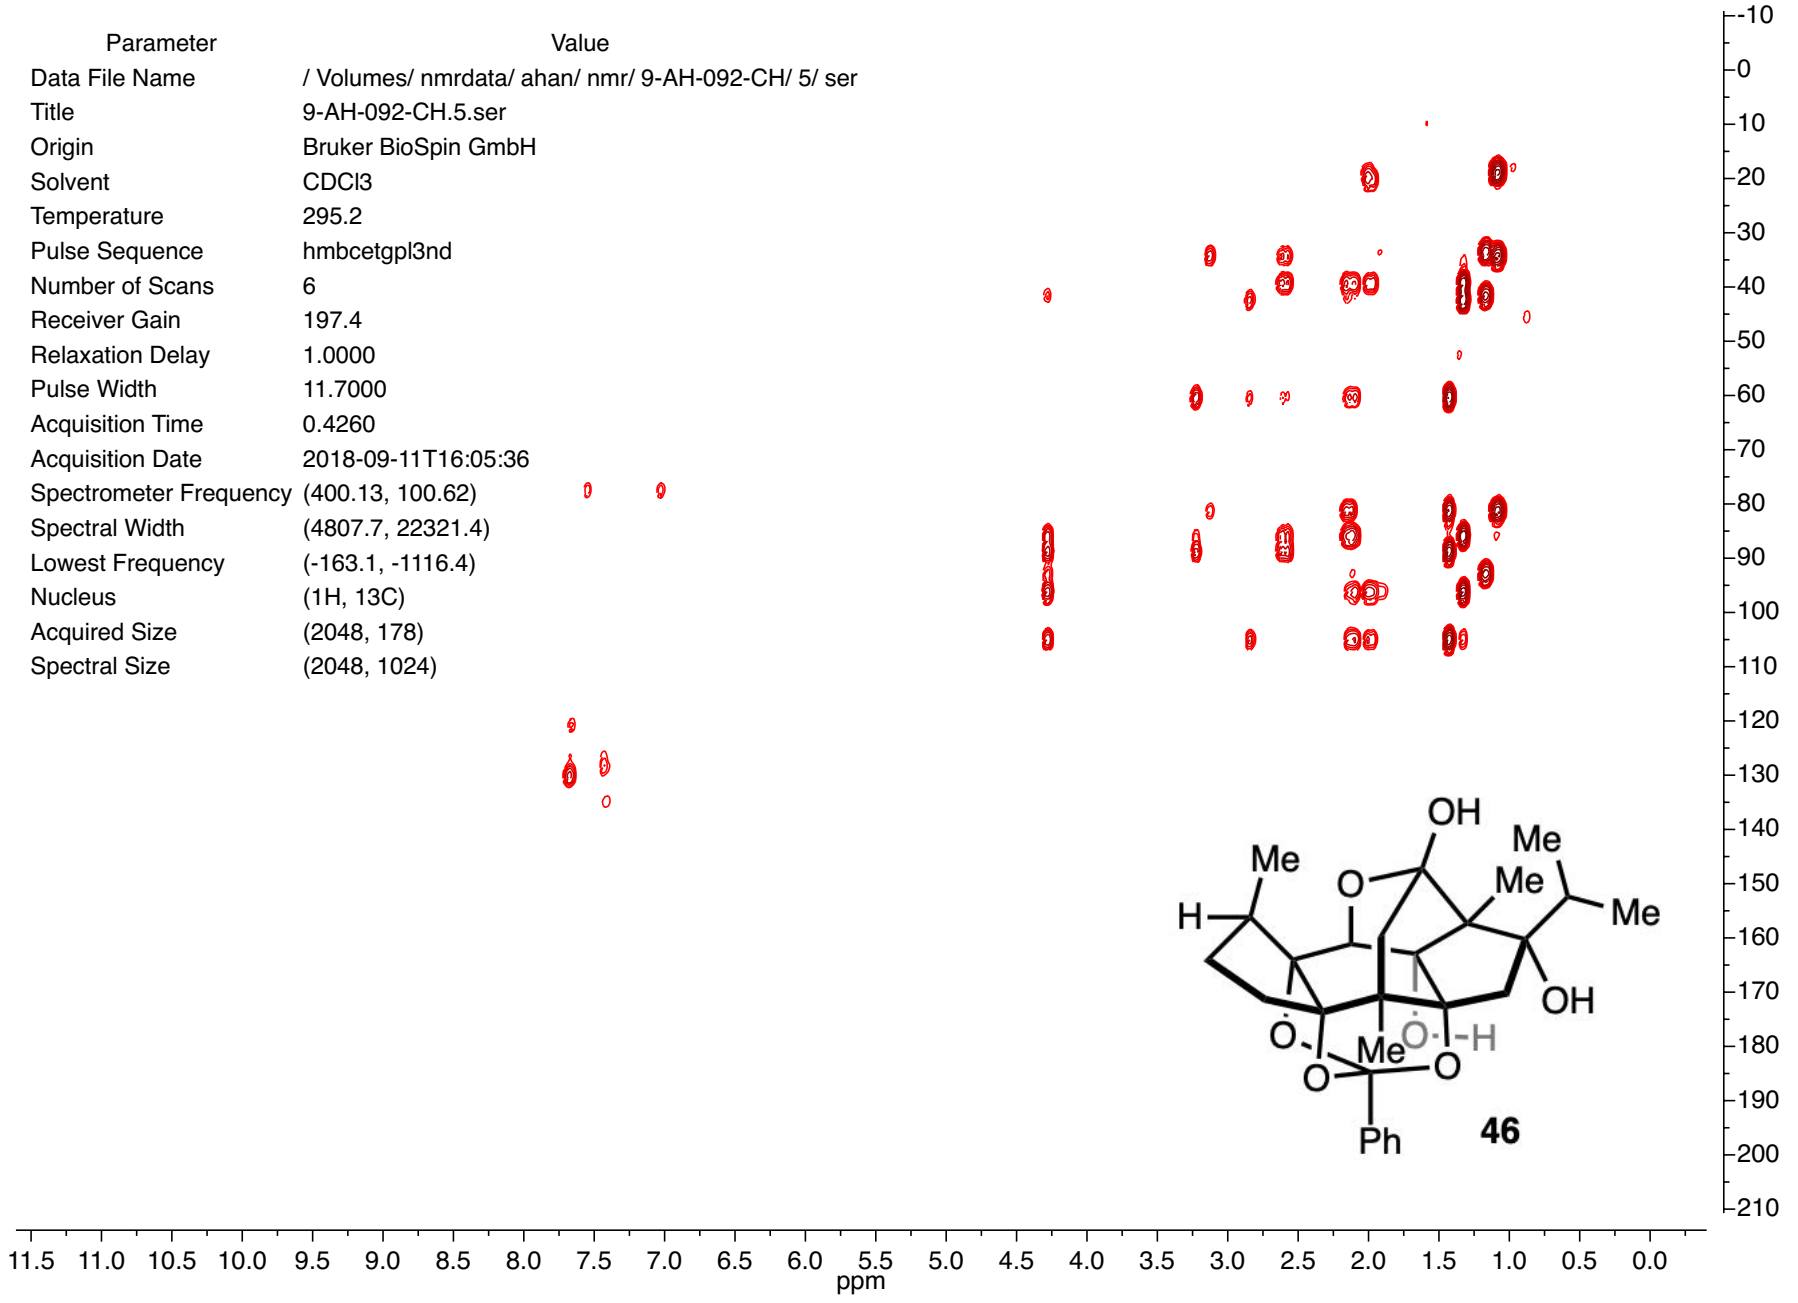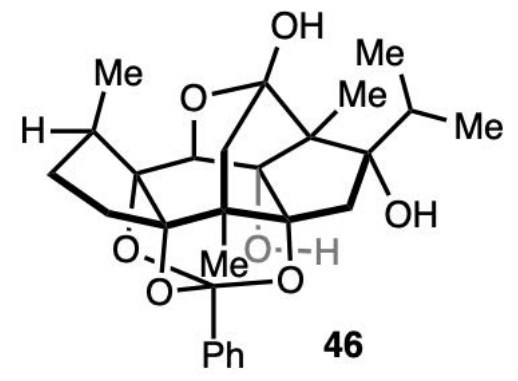

| Parameter              | Value                                              |
|------------------------|----------------------------------------------------|
| Data File Name         | / Volumes/ nmrdata/ ahan/ nmr/ 9-AH-011-CH/ 1/ fid |
| Title                  | 9-AH-011-CH.1.fid                                  |
| Origin                 | Bruker BioSpin GmbH                                |
| Solvent                | CDCl3                                              |
| Temperature            | 297.1                                              |
| Pulse Sequence         | zg30                                               |
| Number of Scans        | 8                                                  |
| Receiver Gain          | 197.4                                              |
| Relaxation Delay       | 5.0000                                             |
| Pulse Width            | 11.7000                                            |
| Acquisition Time       | 4.0894                                             |
| Acquisition Date       | 2018-06-14T21:20:49                                |
| Spectrometer Frequency | 400.13                                             |
| Spectral Width         | 8012.8                                             |
| Lowest Frequency       | -1545.4                                            |
| Nucleus                | 1H                                                 |
| Acquired Size          | 32768                                              |
| Spectral Size          | 65536                                              |

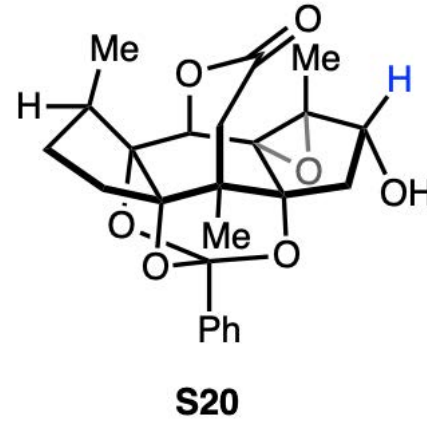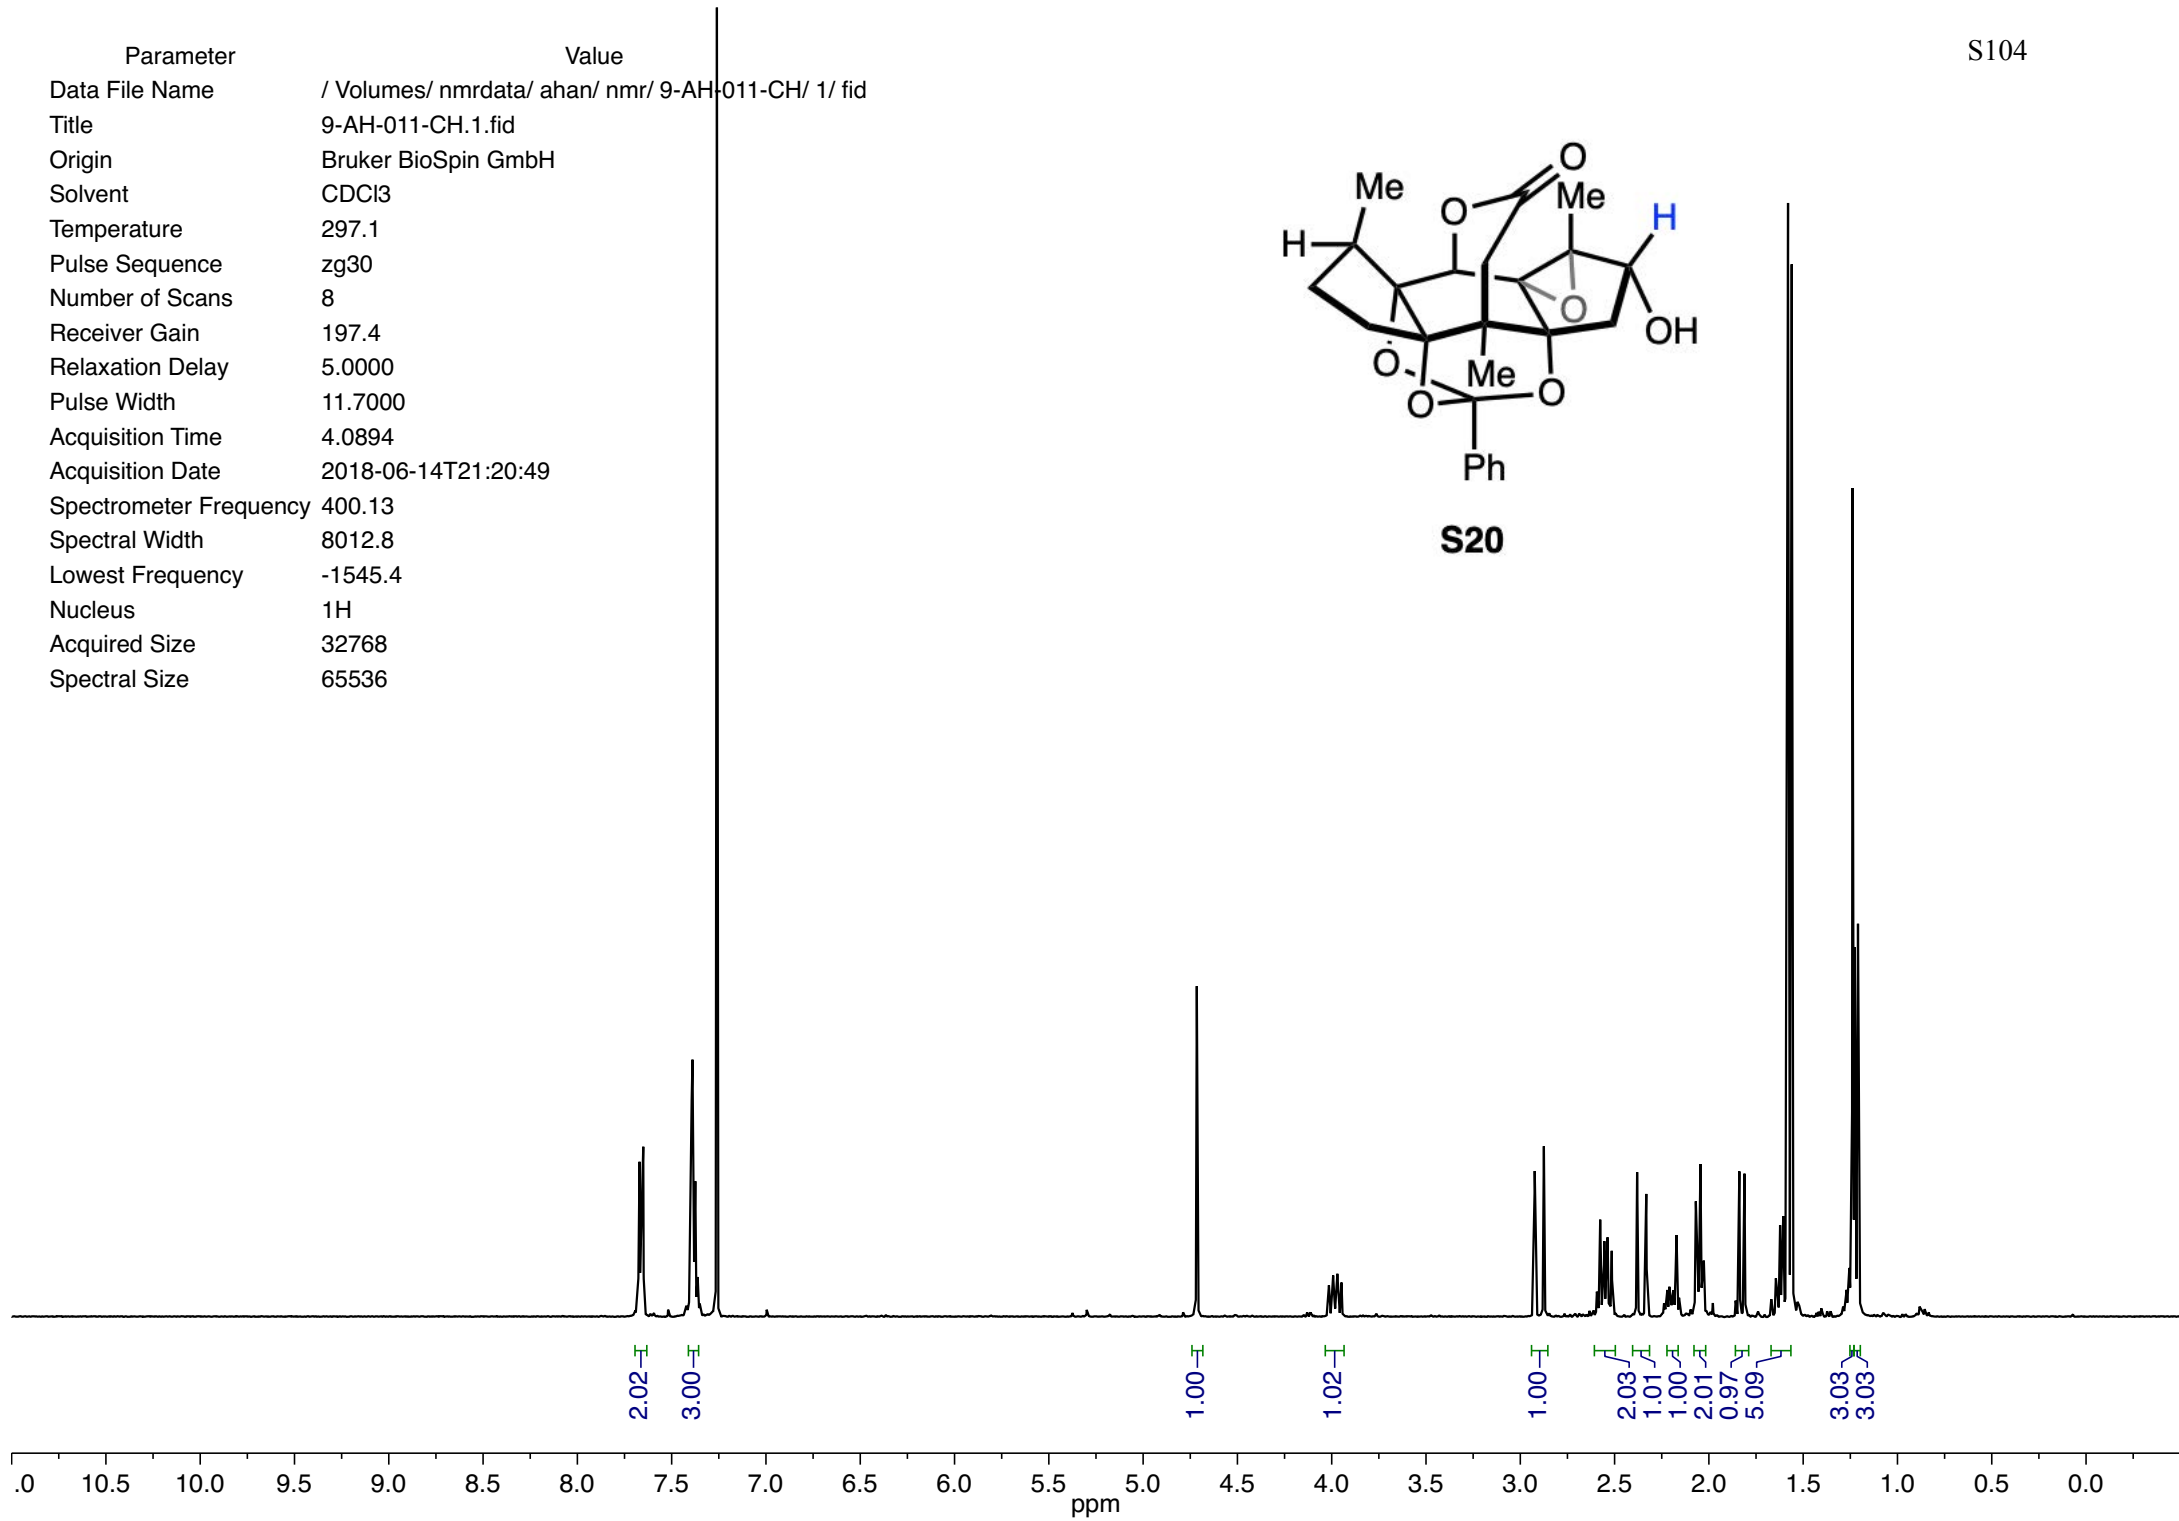

Parameter Value  
Data File Name / Volumes/nmrdata/ ahan/ nmr/ 9-AH-011-CH/ 6/ fid  
Title 9-AH-011-CH.6.fid  
Origin Bruker BioSpin GmbH  
Solvent CDCl3  
Temperature 297.1  
Pulse Sequence zgpg30  
Number of Scans 4500  
Receiver Gain 78.7  
Relaxation Delay 1.0000  
Pulse Width 10.0000  
Acquisition Time 1.3631  
Acquisition Date 2018-06-15T03:29:29  
Spectrometer Frequency 100.62  
Spectral Width 24038.5  
Lowest Frequency -1960.6  
Nucleus 13C  
Acquired Size 32768  
Spectral Size 65536

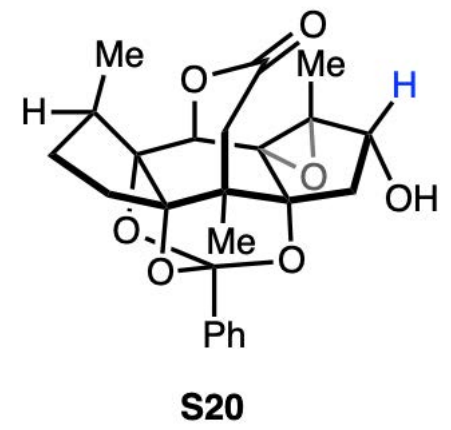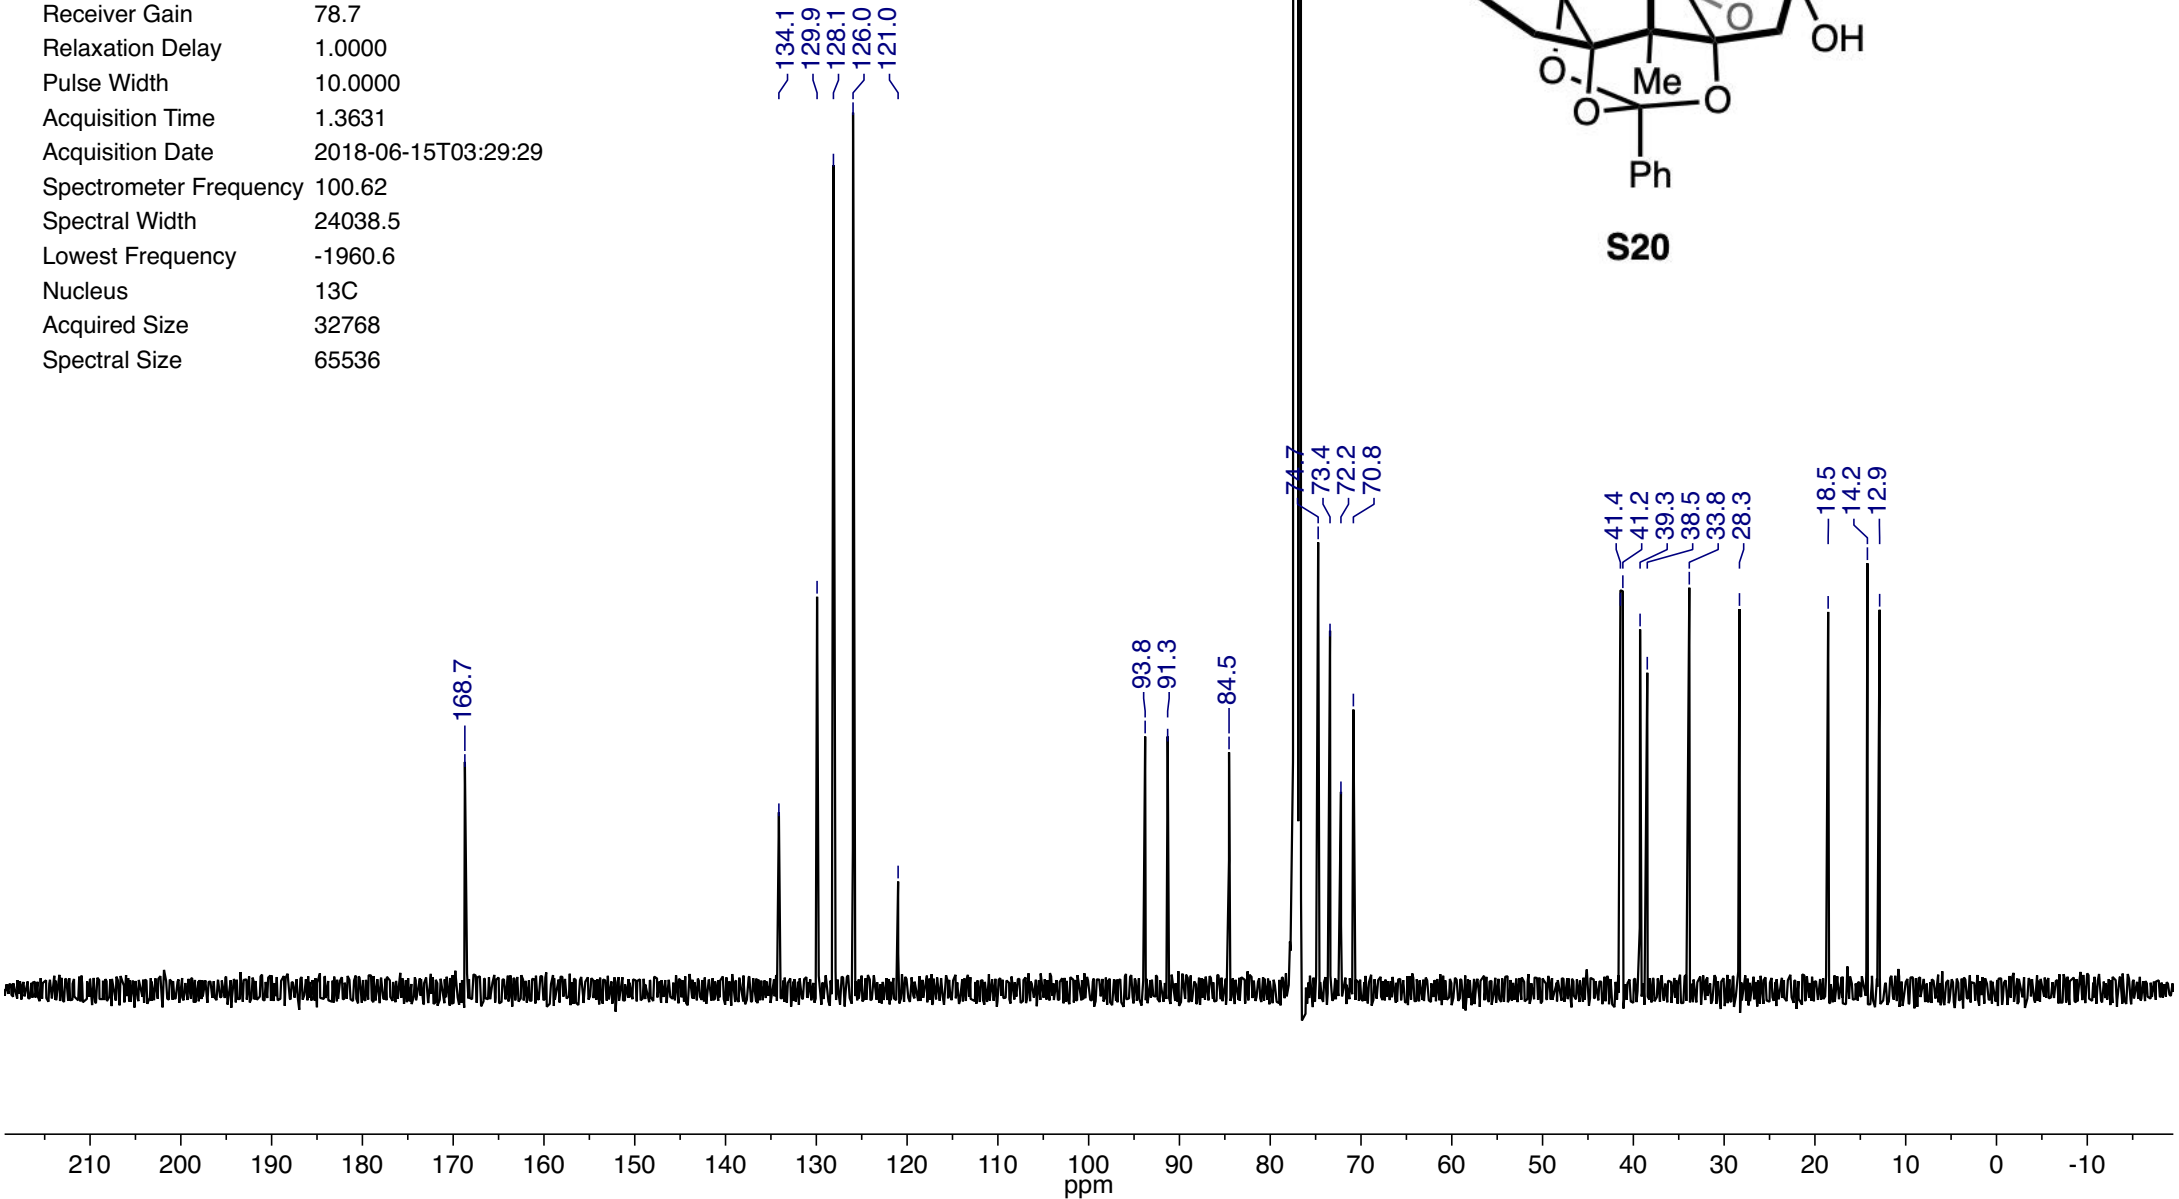

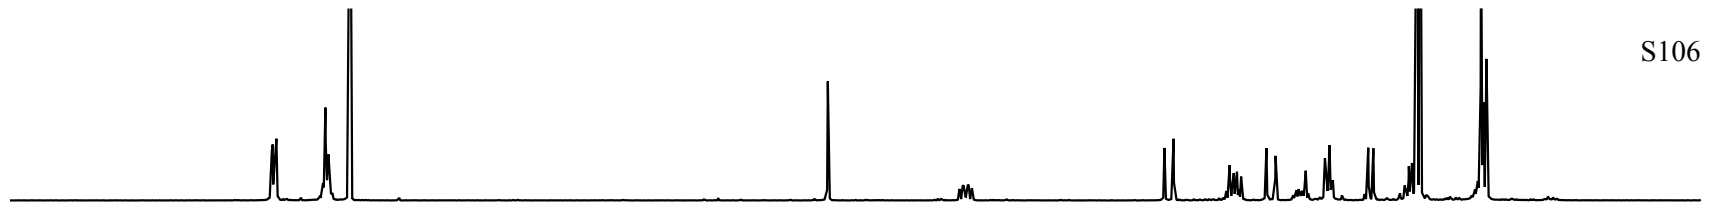

| Parameter              | Value                                              |
|------------------------|----------------------------------------------------|
| Data File Name         | / Volumes/ nmrdata/ ahan/ nmr/ 9-AH-011-CH/ 4/ ser |
| Title                  | 9-AH-011-CH.4.ser                                  |
| Origin                 | Bruker BioSpin GmbH                                |
| Solvent                | CDCl3                                              |
| Temperature            | 297.1                                              |
| Pulse Sequence         | noesygpzhs                                         |
| Number of Scans        | 15                                                 |
| Receiver Gain          | 197.4                                              |
| Relaxation Delay       | 1.0000                                             |
| Pulse Width            | 11.7000                                            |
| Acquisition Time       | 0.2560                                             |
| Acquisition Date       | 2018-06-14T22:11:49                                |
| Spectrometer Frequency | (400.13, 400.13)                                   |
| Spectral Width         | (4000.0, 4000.0)                                   |
| Lowest Frequency       | (-195.7, -195.7)                                   |
| Nucleus                | (1H, 1H)                                           |
| Acquired Size          | (1024, 256)                                        |
| Spectral Size          | (1024, 1024)                                       |

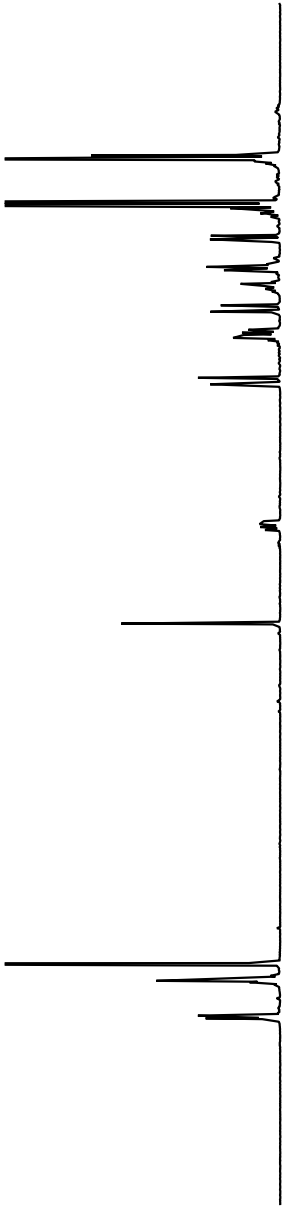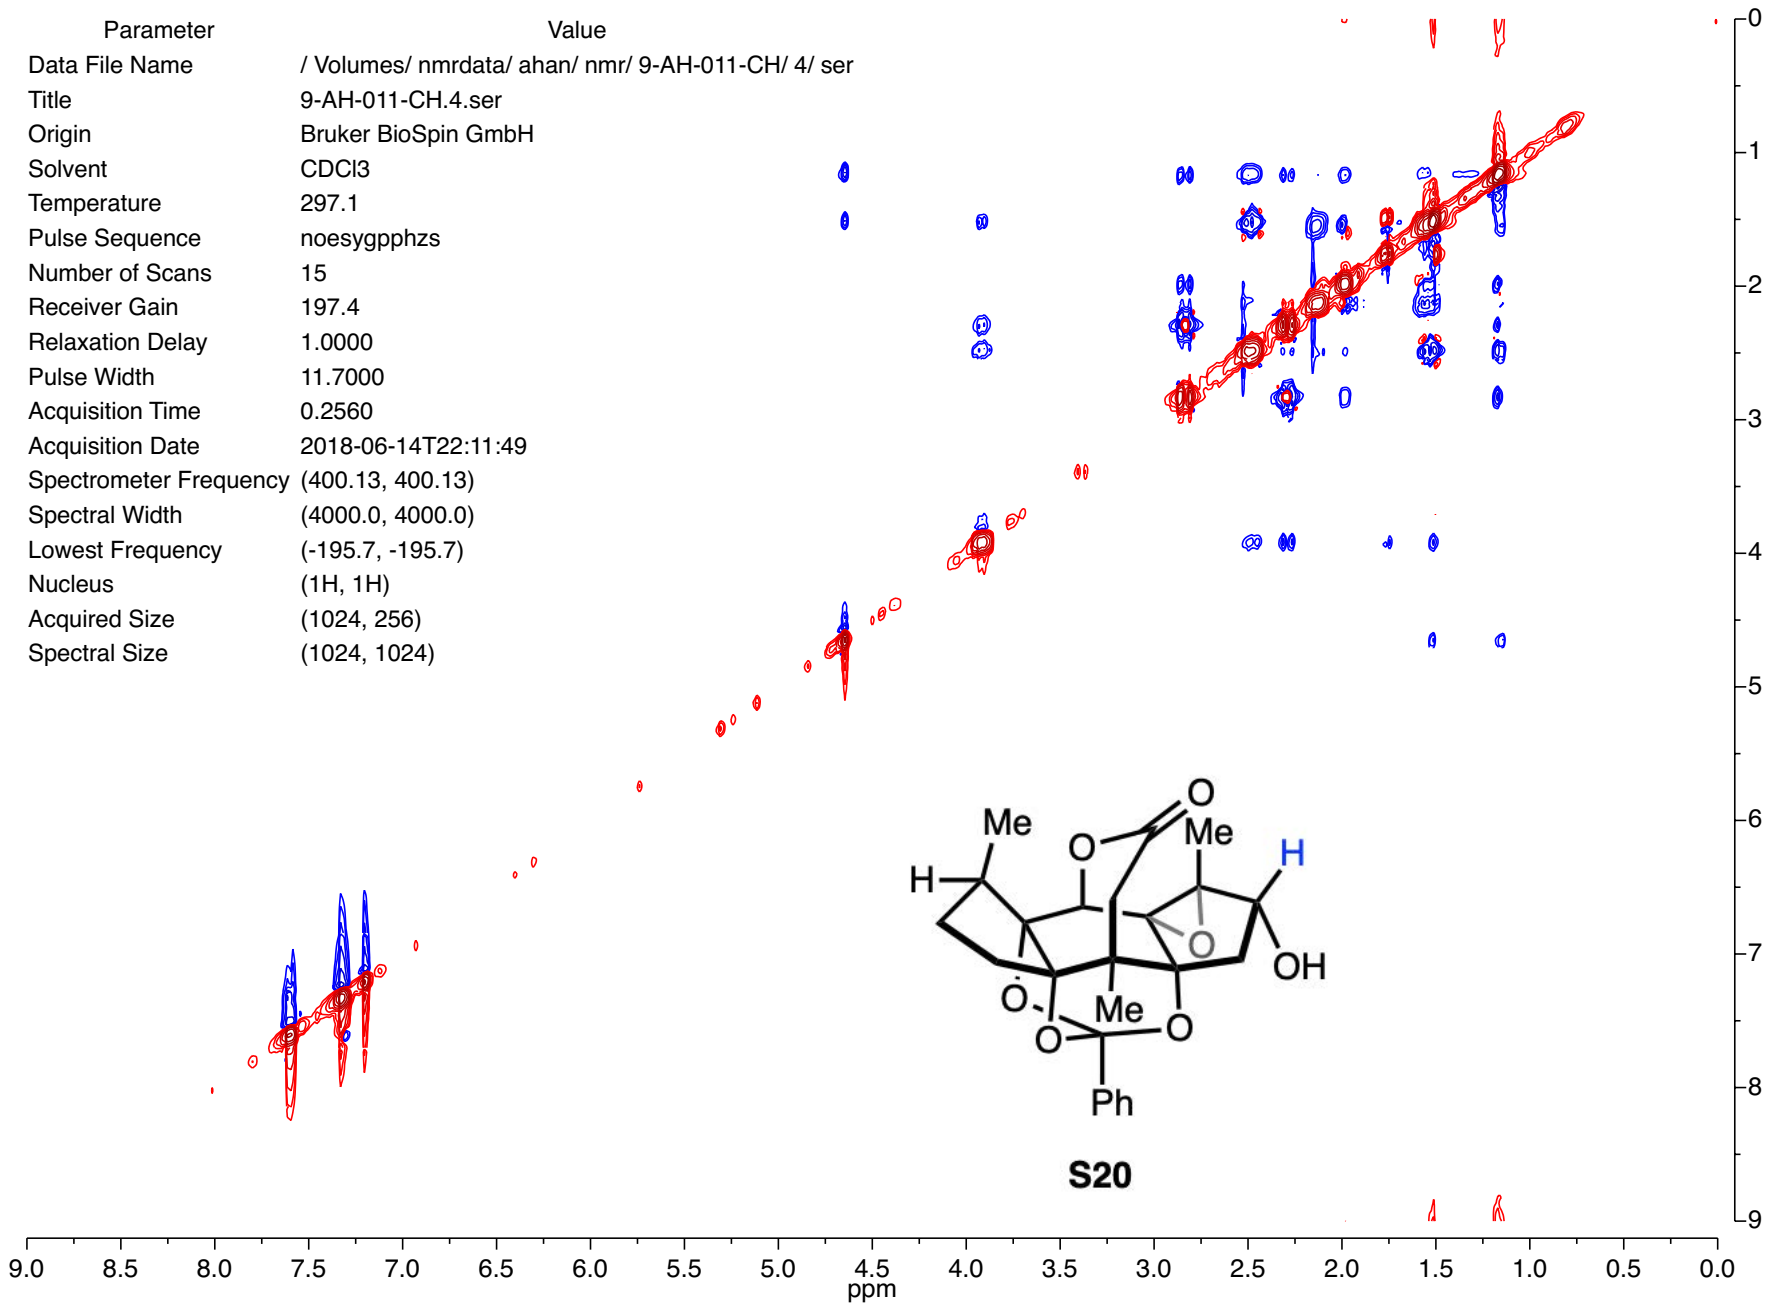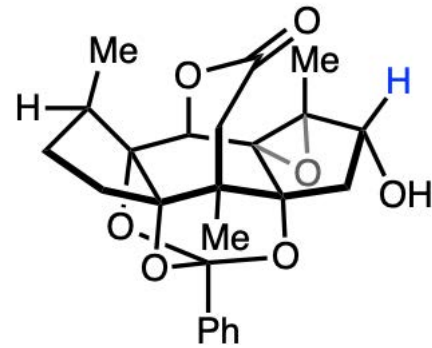

S20

| Parameter              | Value                                       |
|------------------------|---------------------------------------------|
| Data File Name         | /Volumes/nmrdata/ahan/nmr/9-AH-012-CH/1/fid |
| Title                  | 9-AH-012-CH.1.fid                           |
| Origin                 | Bruker BioSpin GmbH                         |
| Solvent                | MeOD                                        |
| Temperature            | 297.1                                       |
| Pulse Sequence         | zg30                                        |
| Number of Scans        | 8                                           |
| Receiver Gain          | 197.4                                       |
| Relaxation Delay       | 5.0000                                      |
| Pulse Width            | 11.7000                                     |
| Acquisition Time       | 4.0894                                      |
| Acquisition Date       | 2018-06-15T10:47:00                         |
| Spectrometer Frequency | 400.13                                      |
| Spectral Width         | 8012.8                                      |
| Lowest Frequency       | -1543.4                                     |
| Nucleus                | 1H                                          |
| Acquired Size          | 32768                                       |
| Spectral Size          | 65536                                       |

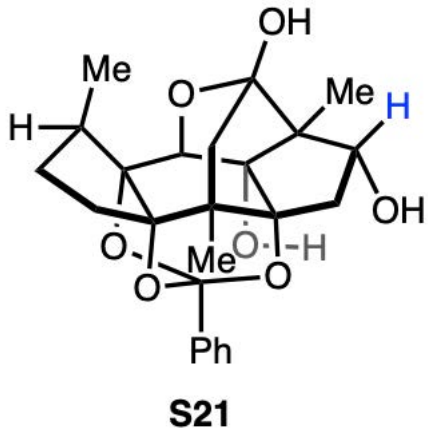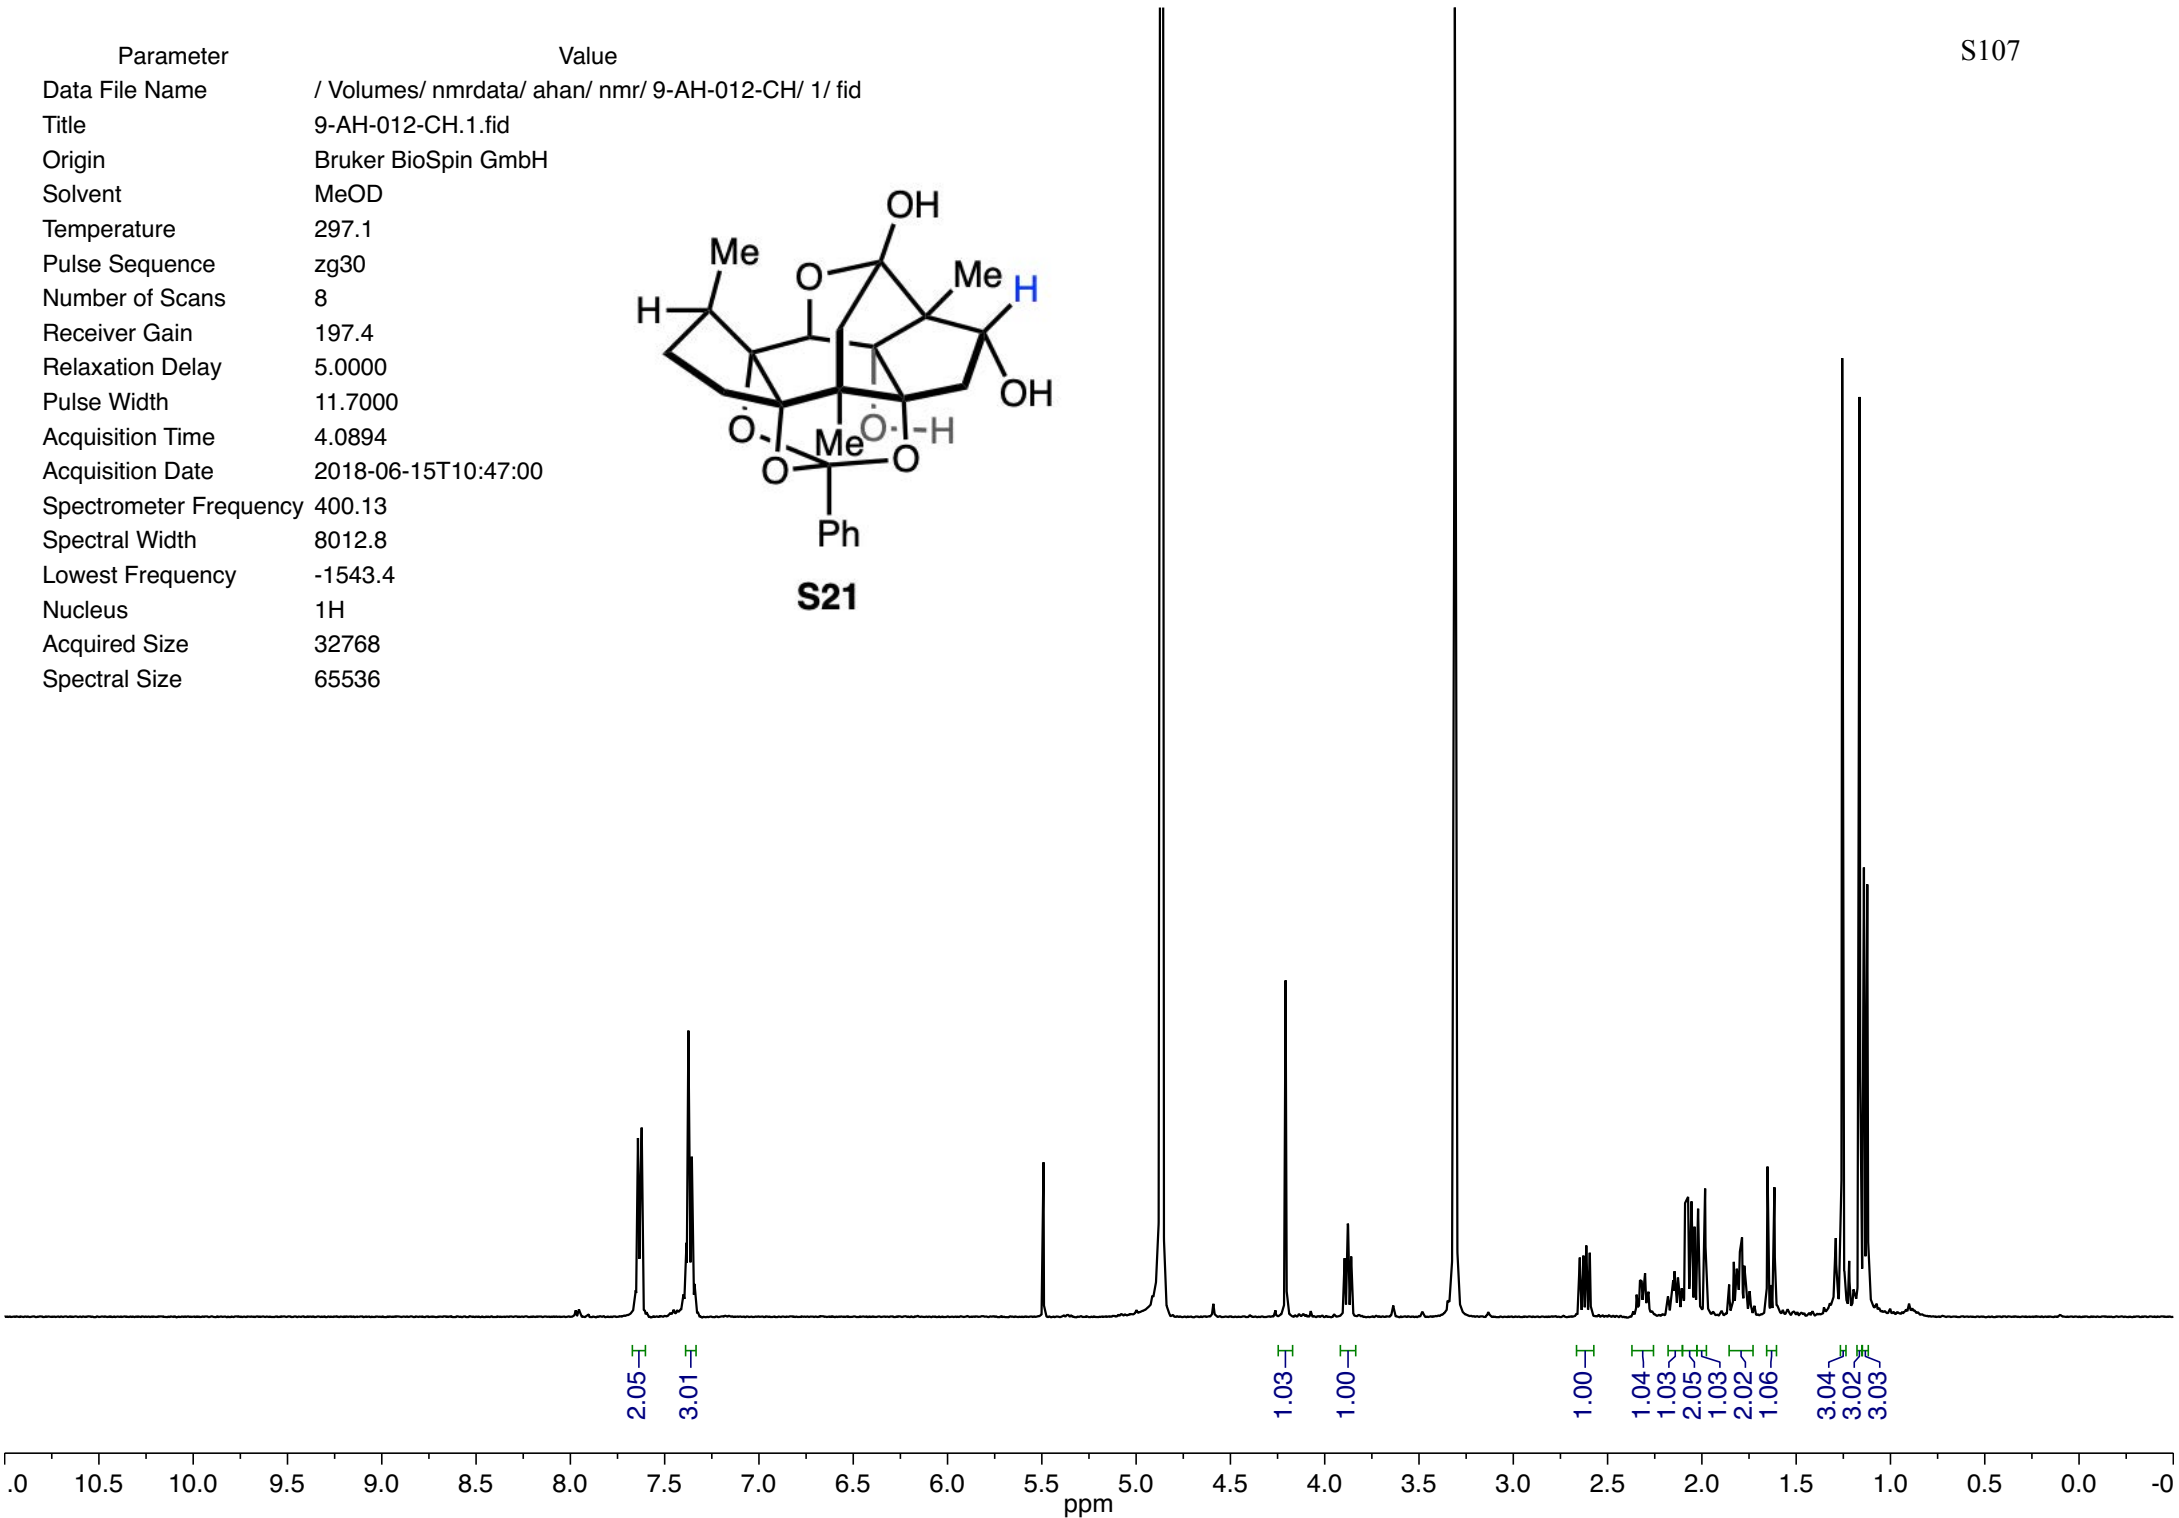

| Parameter              | Value                                              |
|------------------------|----------------------------------------------------|
| Data File Name         | / Volumes/ nmrdata/ ahan/ nmr/ 9-AH-012-CH/ 4/ fid |
| Title                  | 9-AH-012-CH.4.fid                                  |
| Origin                 | Bruker BioSpin GmbH                                |
| Solvent                | MeOD                                               |
| Temperature            | 297.2                                              |
| Pulse Sequence         | zgpg30                                             |
| Number of Scans        | 1100                                               |
| Receiver Gain          | 64.2                                               |
| Relaxation Delay       | 1.0000                                             |
| Pulse Width            | 10.0000                                            |
| Acquisition Time       | 1.3631                                             |
| Acquisition Date       | 2018-06-15T12:36:20                                |
| Spectrometer Frequency | 100.62                                             |
| Spectral Width         | 24038.5                                            |
| Lowest Frequency       | -1816.9                                            |
| Nucleus                | <sup>13</sup> C                                    |
| Acquired Size          | 32768                                              |
| Spectral Size          | 65536                                              |

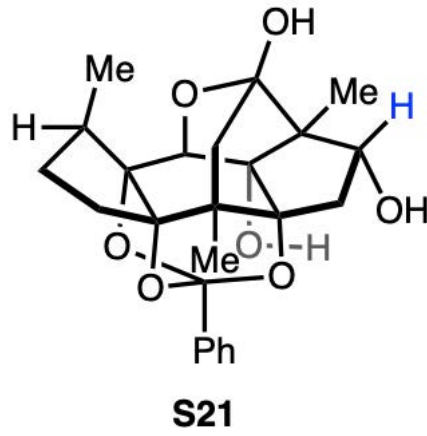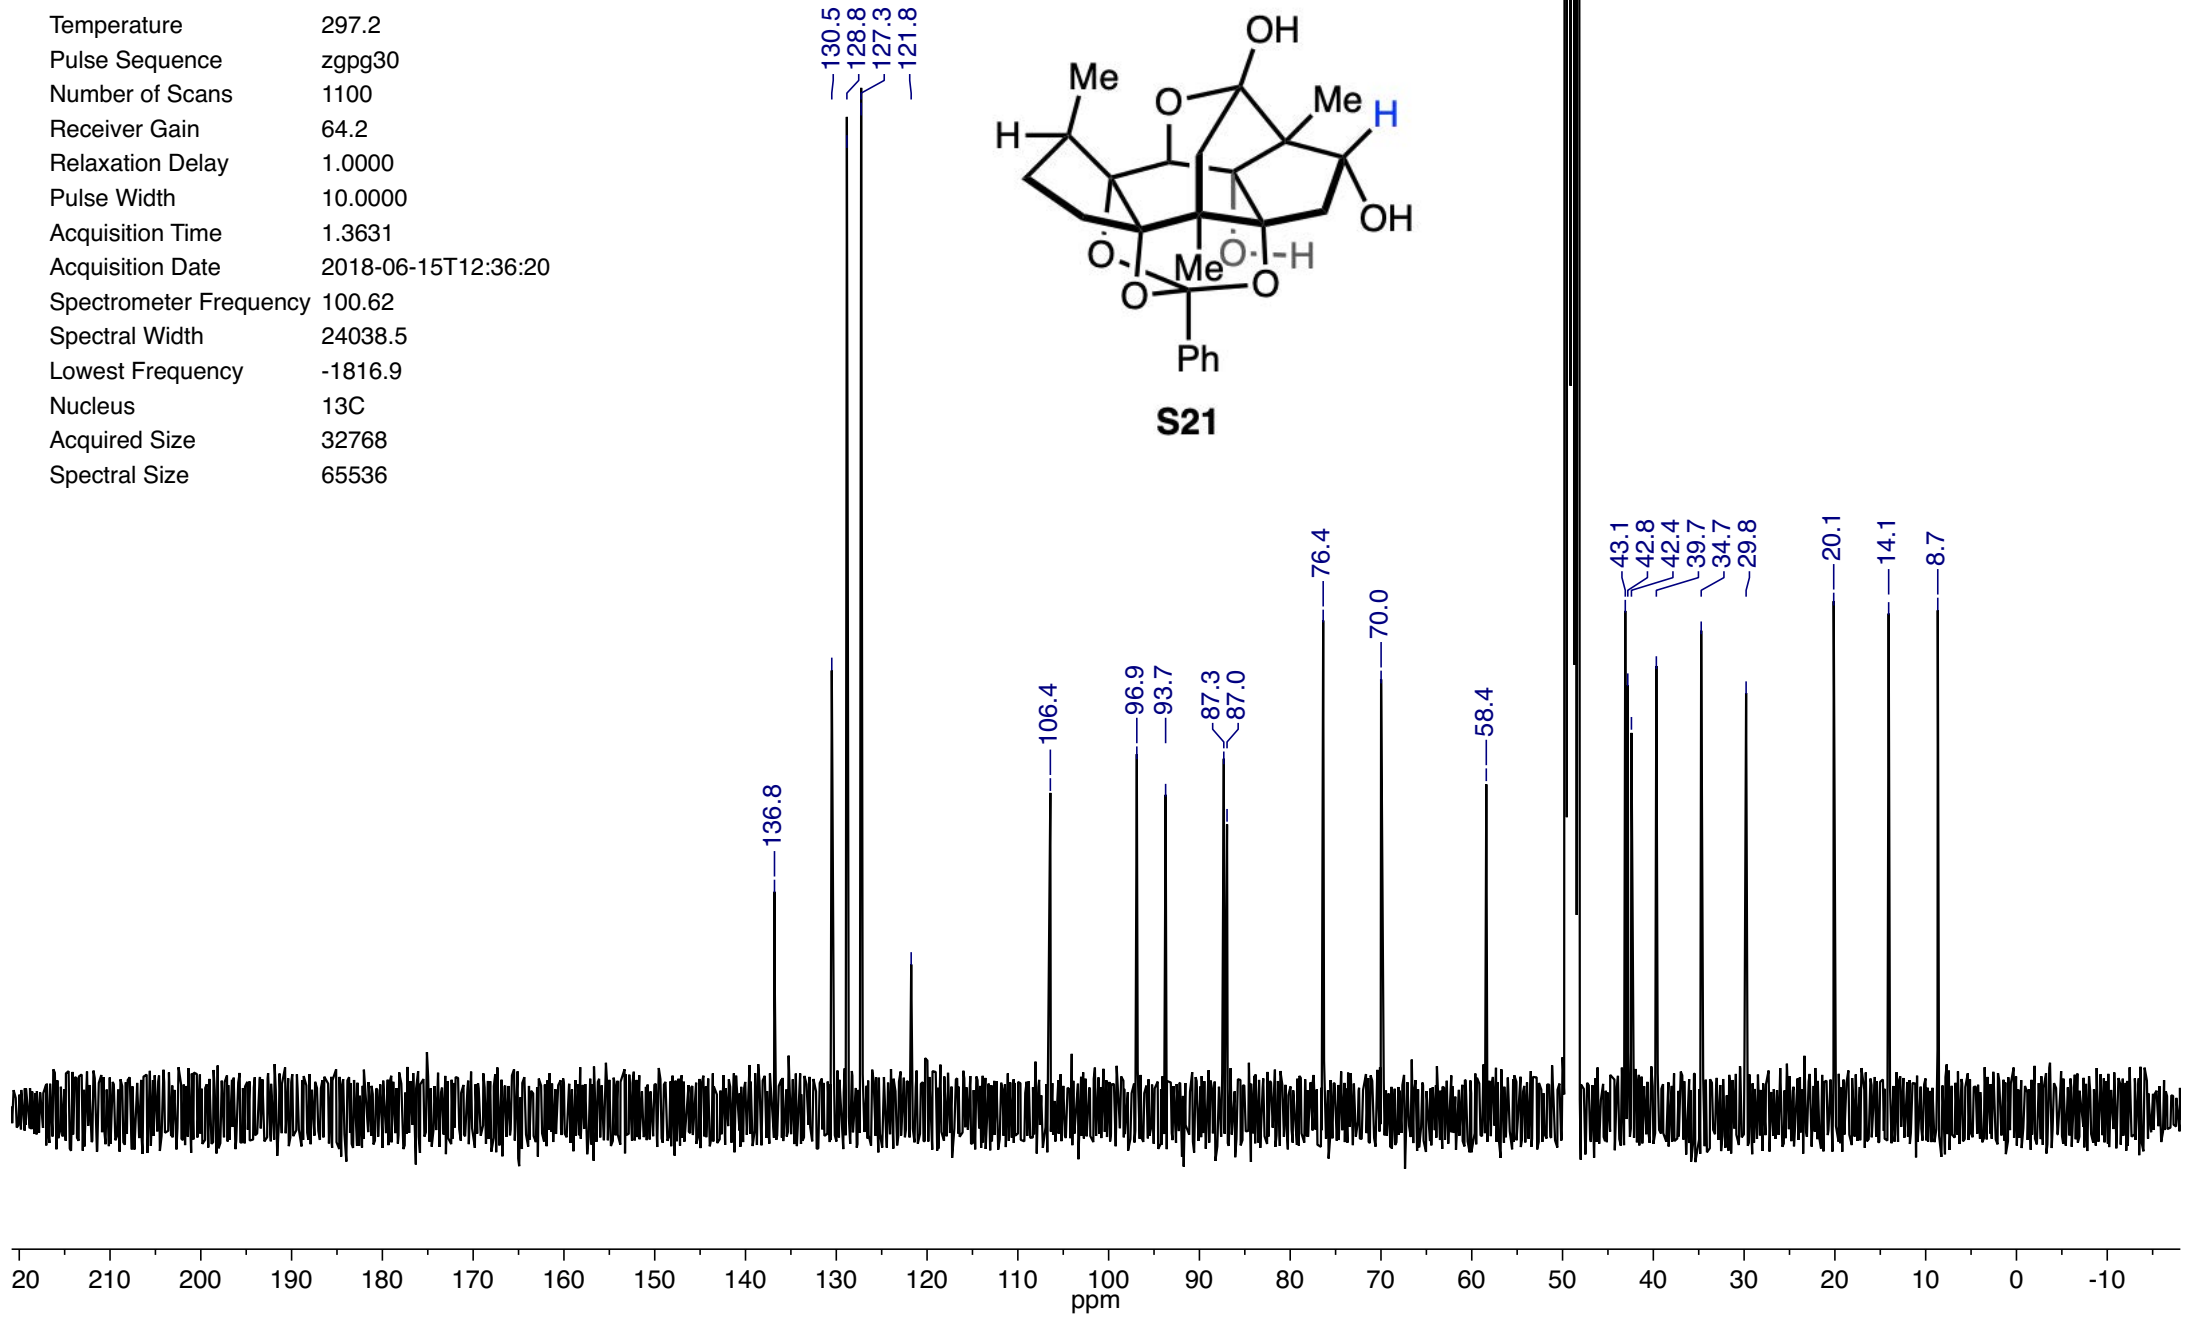



| Parameter              | Value                                              |
|------------------------|----------------------------------------------------|
| Data File Name         | / Volumes/ nmrdata/ ahan/ nmr/ 9-AH-094-CH/ 9/ fid |
| Title                  | 9-AH-094-CH.9.fid                                  |
| Origin                 | Bruker BioSpin GmbH                                |
| Solvent                | MeOD                                               |
| Temperature            | 295.1                                              |
| Pulse Sequence         | zg30                                               |
| Number of Scans        | 8                                                  |
| Receiver Gain          | 197.4                                              |
| Relaxation Delay       | 5.0000                                             |
| Pulse Width            | 11.7000                                            |
| Acquisition Time       | 4.0894                                             |
| Acquisition Date       | 2018-09-13T12:00:33                                |
| Spectrometer Frequency | 400.13                                             |
| Spectral Width         | 8012.8                                             |
| Lowest Frequency       | -1543.6                                            |
| Nucleus                | 1H                                                 |
| Acquired Size          | 32768                                              |
| Spectral Size          | 65536                                              |

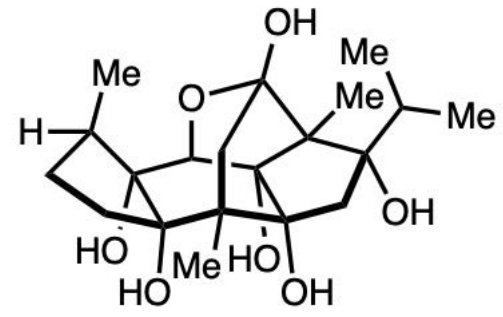

**(+)-perseanol (3)**

*<sup>1</sup>H NMR (400 MHz, CD<sub>3</sub>OD)*

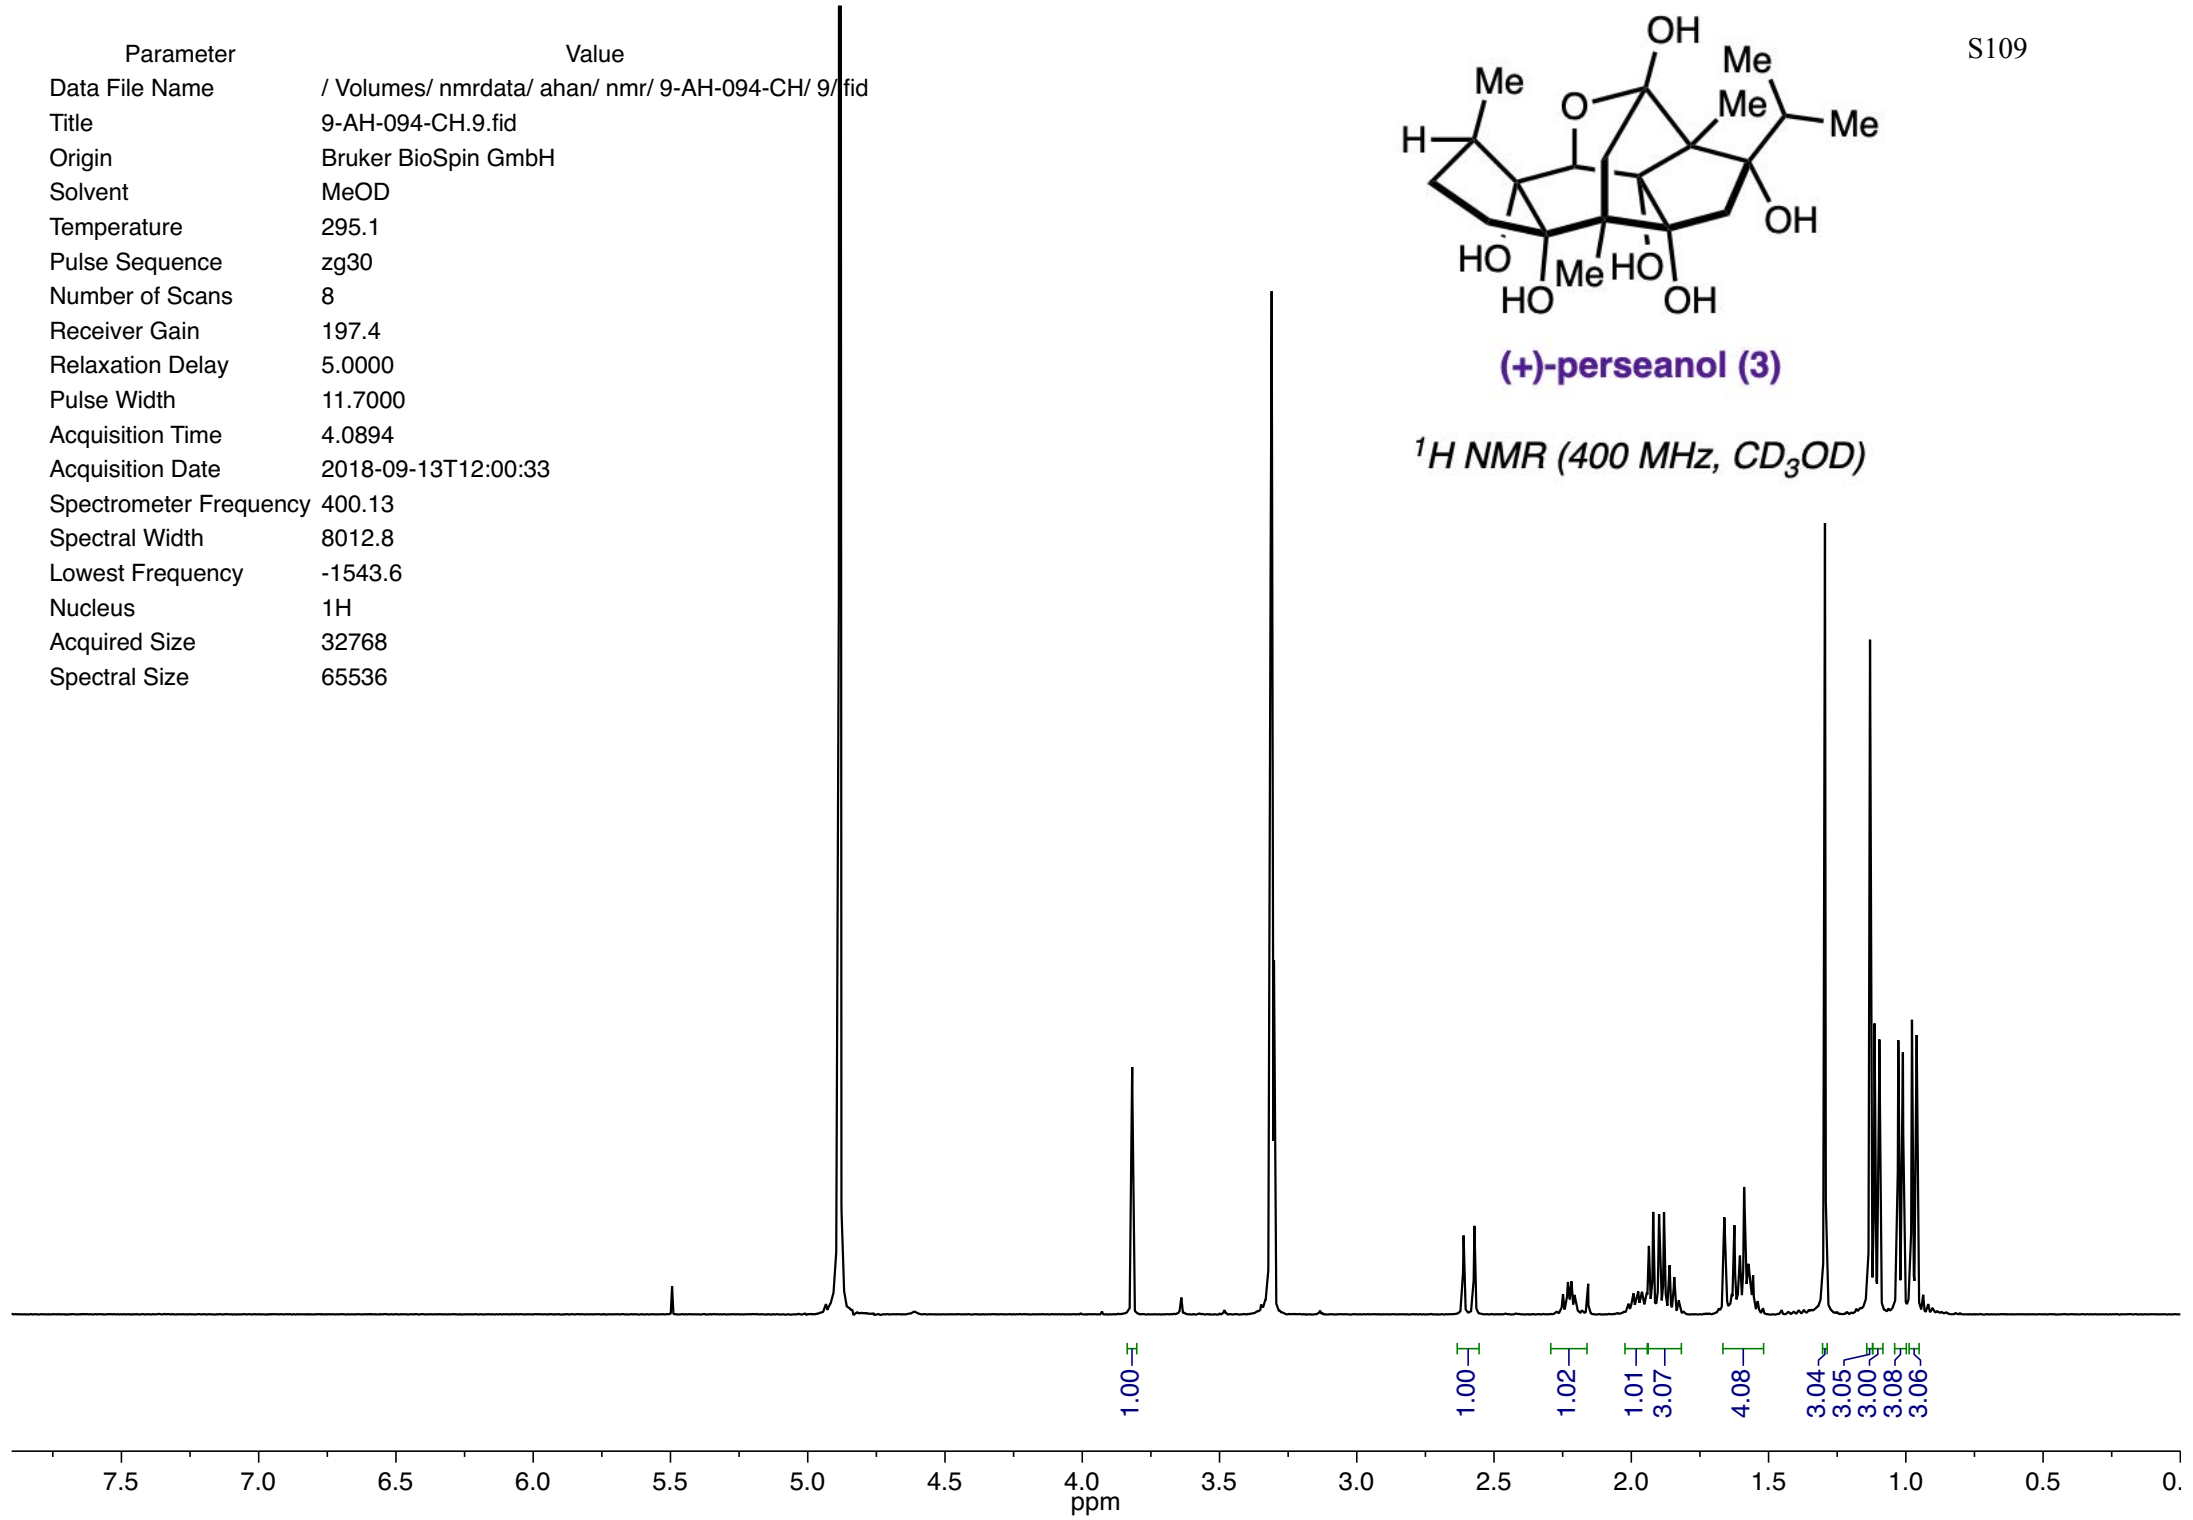

| Parameter              | Value                                                                   |
|------------------------|-------------------------------------------------------------------------|
| Data File Name         | / Volumes/ nmrdata/ ahan/ vnmrsys/ data/ 9-AH-094-CH/ PROTON01.fid/ fid |
| Title                  | PROTON01                                                                |
| Origin                 | Varian                                                                  |
| Solvent                | cd3od                                                                   |
| Temperature            | 25.0                                                                    |
| Pulse Sequence         | s2pul                                                                   |
| Number of Scans        | 16                                                                      |
| Receiver Gain          | 38                                                                      |
| Relaxation Delay       | 5.0000                                                                  |
| Pulse Width            | 5.8000                                                                  |
| Acquisition Time       | 3.0000                                                                  |
| Acquisition Date       | 2018-09-13T06:00:59                                                     |
| Spectrometer Frequency | 499.63                                                                  |
| Spectral Width         | 8000.0                                                                  |
| Lowest Frequency       | -1011.7                                                                 |
| Nucleus                | 1H                                                                      |
| Acquired Size          | 24000                                                                   |
| Spectral Size          | 65536                                                                   |

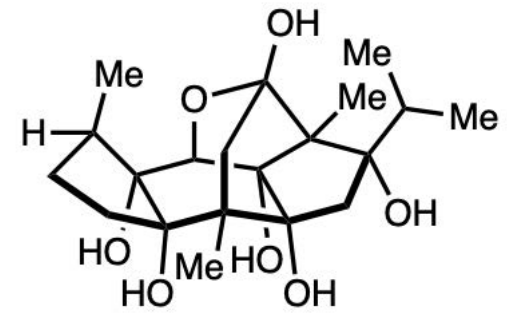

**(+)-perseanol (3)**

*<sup>1</sup>H NMR (500 MHz, CD<sub>3</sub>OD)*

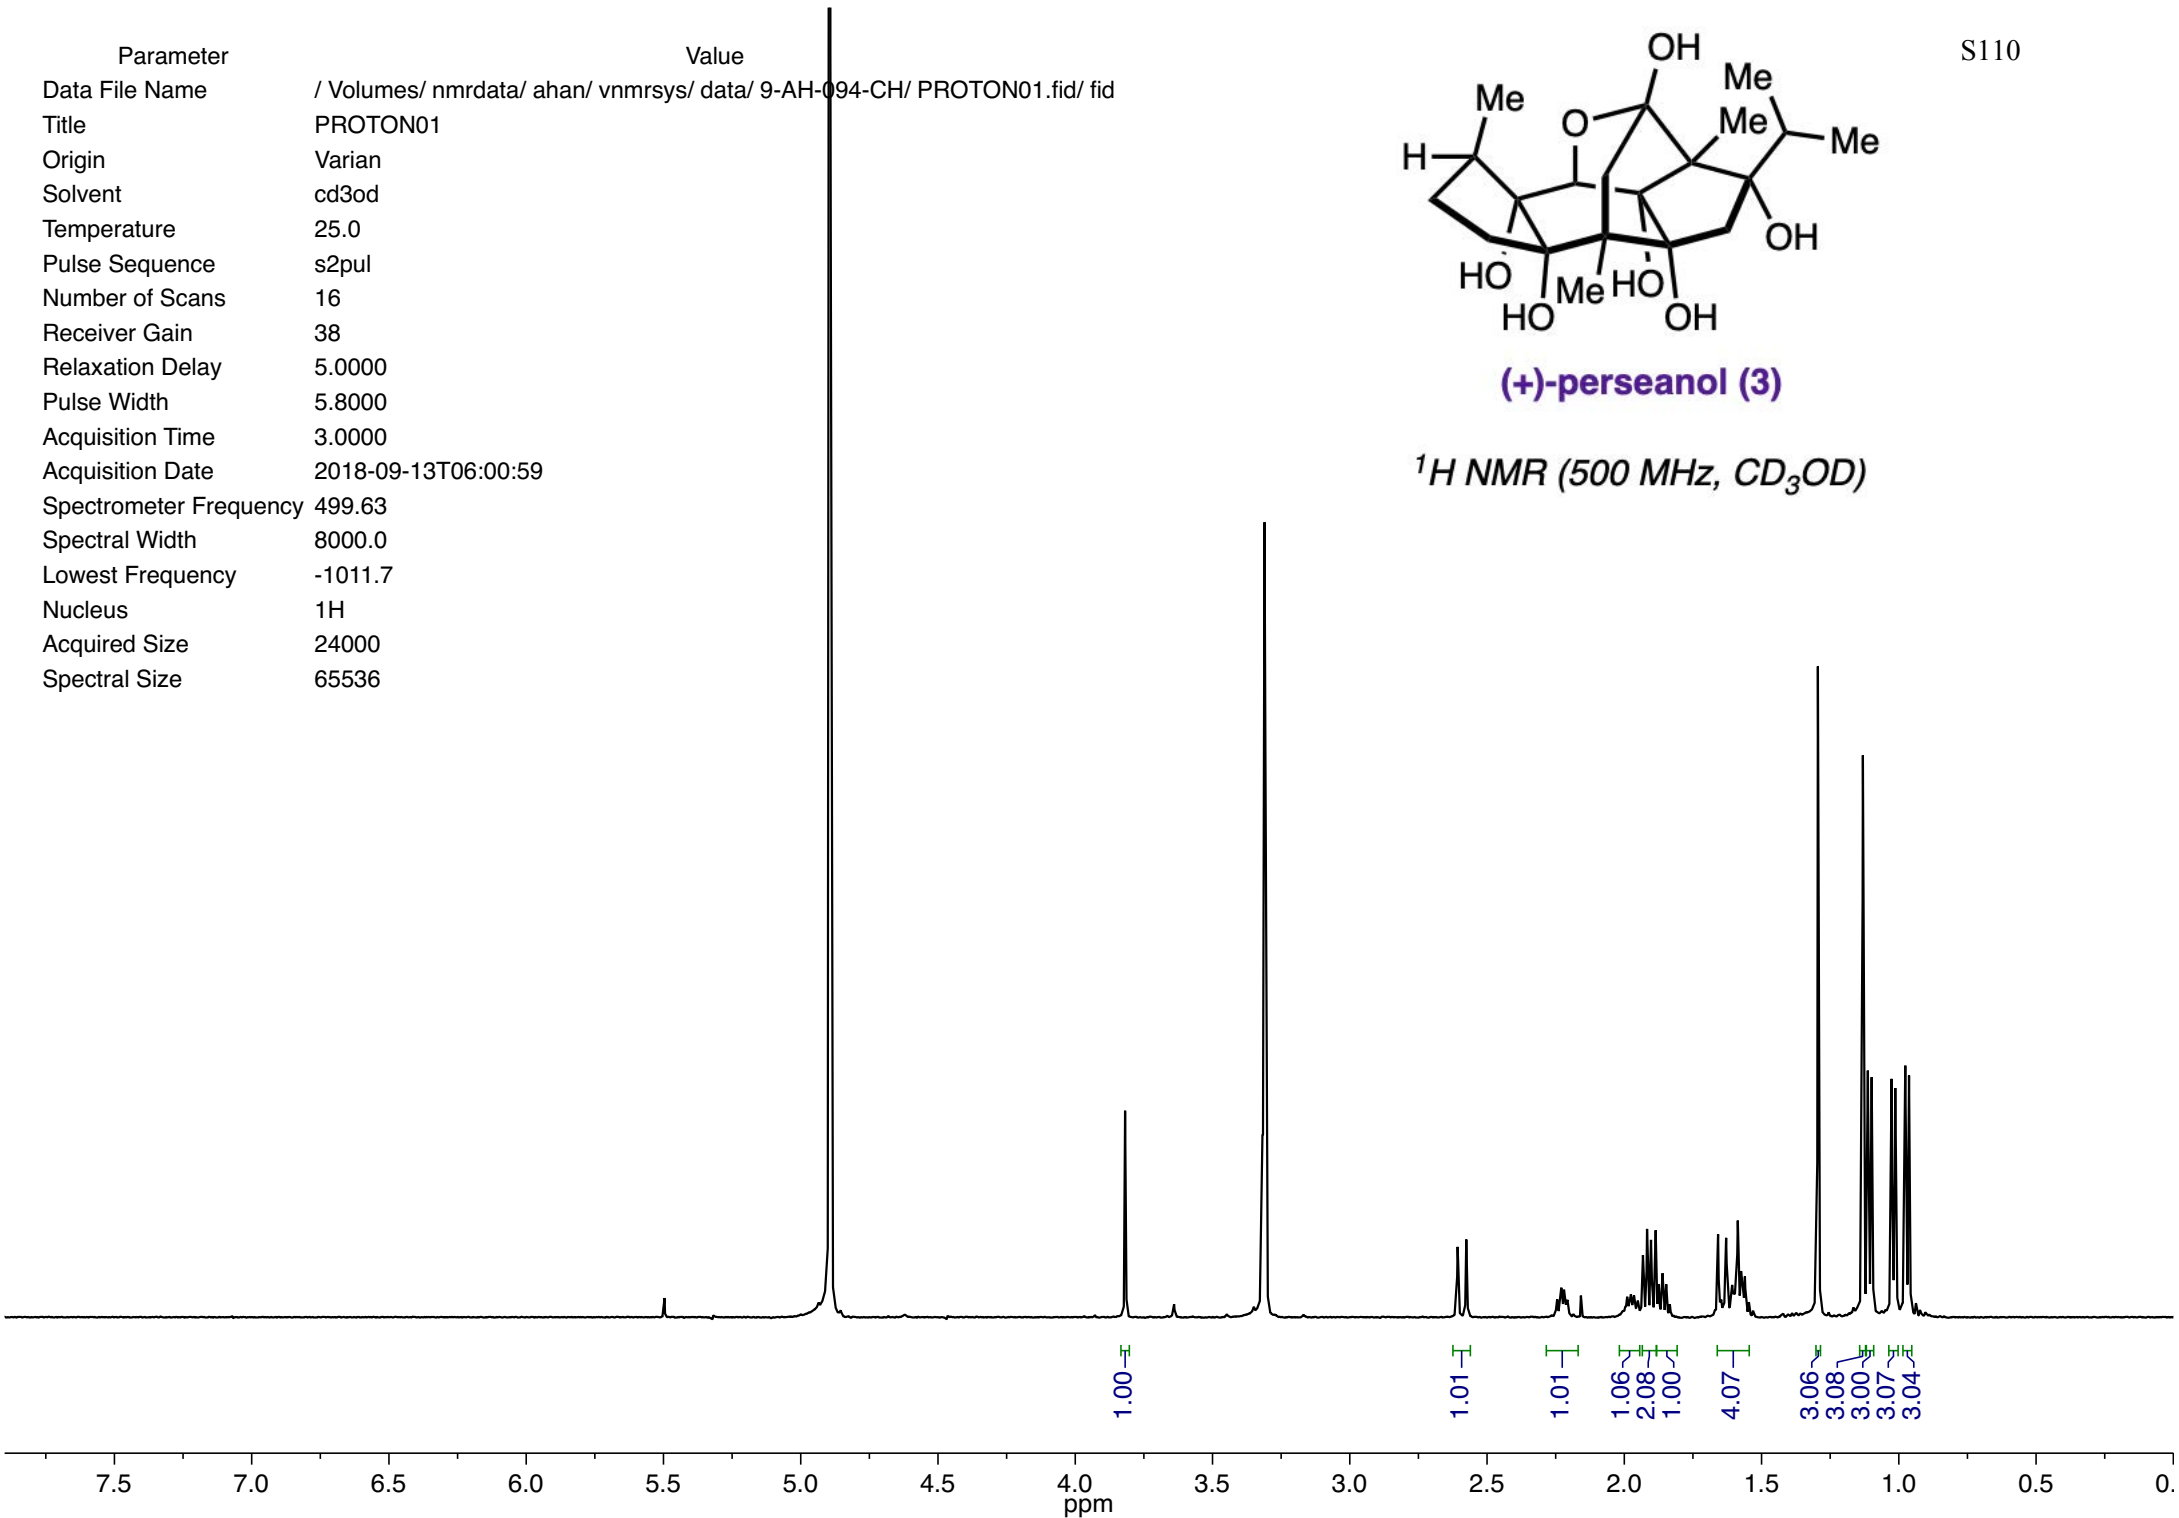

| Parameter              | Value                                              |
|------------------------|----------------------------------------------------|
| Data File Name         | / Volumes/ nmrdata/ ahan/ nmr/ 9-AH-094-CH/ 2/ fid |
| Title                  | 9-AH-094-CH.2.fid                                  |
| Origin                 | Bruker BioSpin GmbH                                |
| Solvent                | MeOD                                               |
| Temperature            | 295.1                                              |
| Pulse Sequence         | zgpg30                                             |
| Number of Scans        | 3000                                               |
| Receiver Gain          | 64.2                                               |
| Relaxation Delay       | 1.0000                                             |
| Pulse Width            | 10.0000                                            |
| Acquisition Time       | 1.3631                                             |
| Acquisition Date       | 2018-09-12T23:31:17                                |
| Spectrometer Frequency | 100.62                                             |
| Spectral Width         | 24038.5                                            |
| Lowest Frequency       | -1816.9                                            |
| Nucleus                | <sup>13</sup> C                                    |
| Acquired Size          | 32768                                              |
| Spectral Size          | 65536                                              |

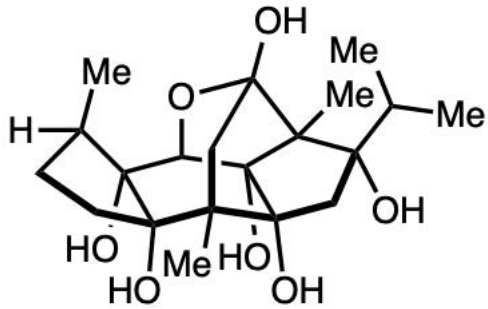

**(+)-perseanol (3)**

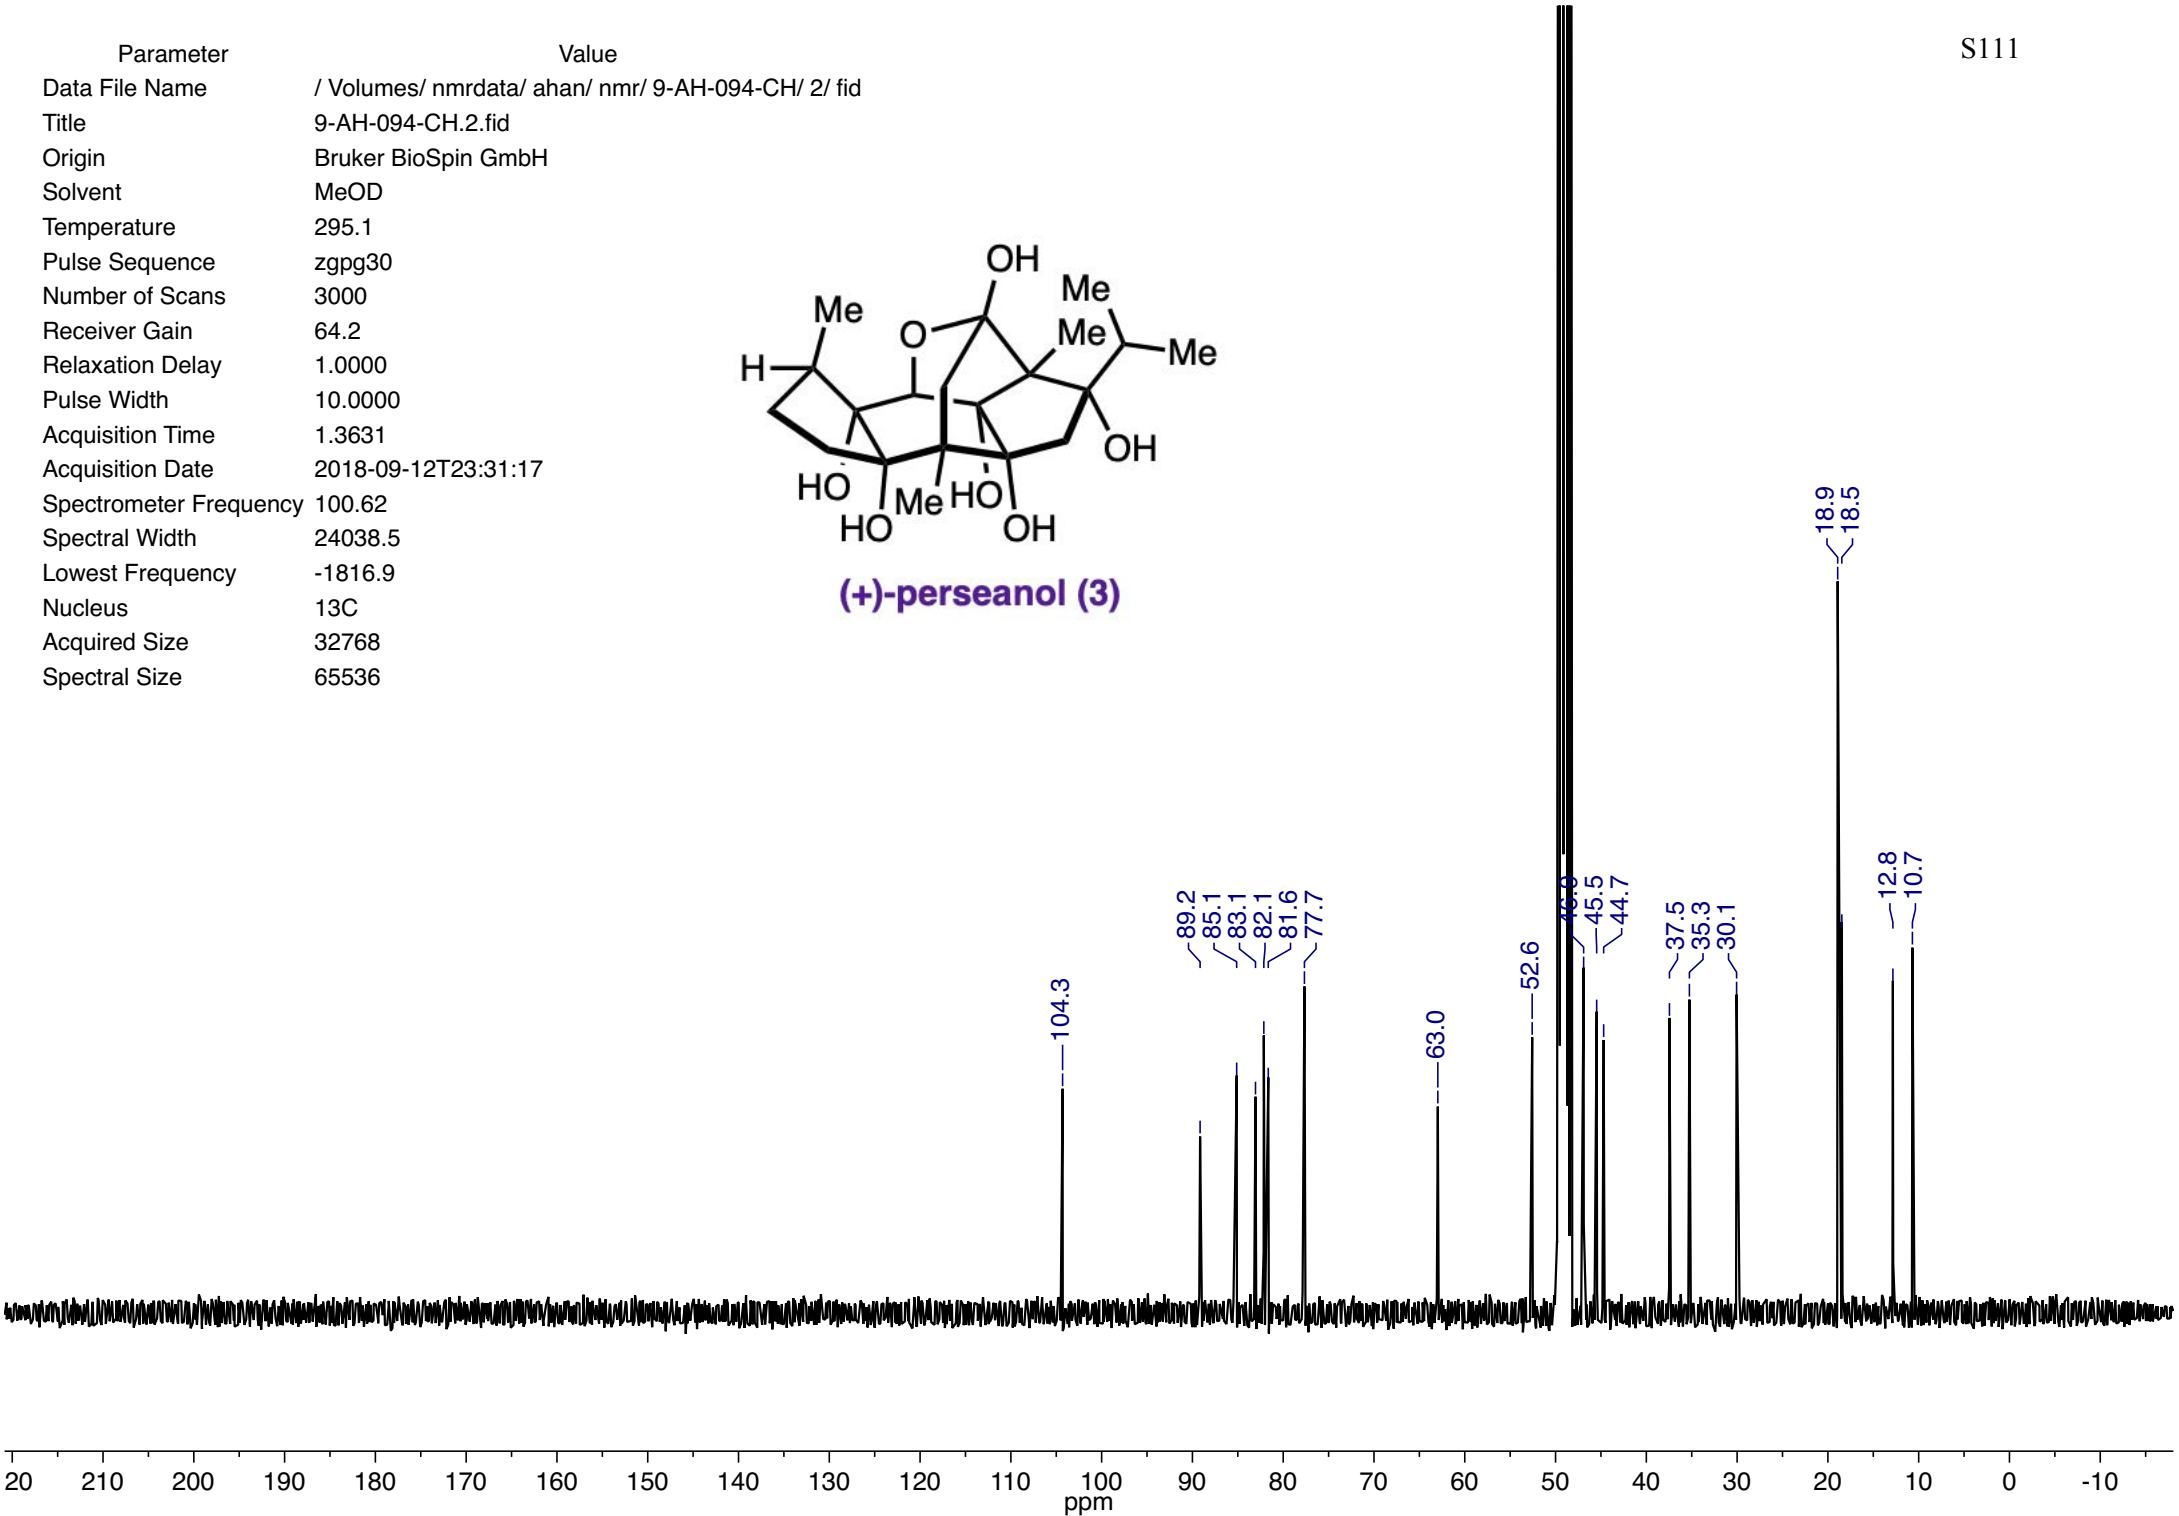

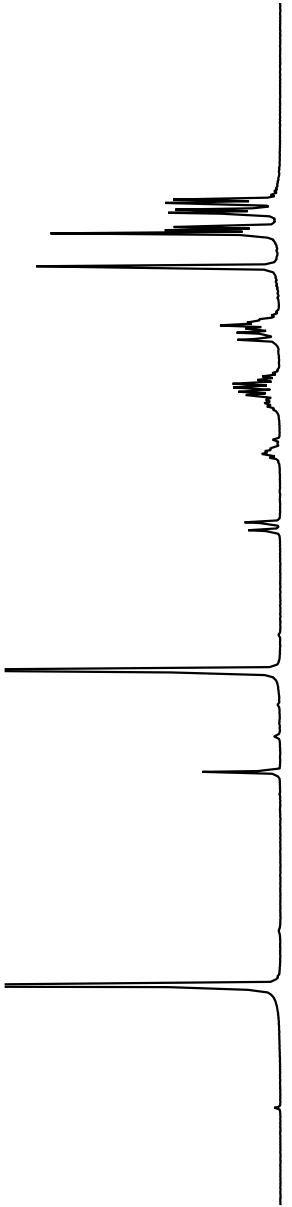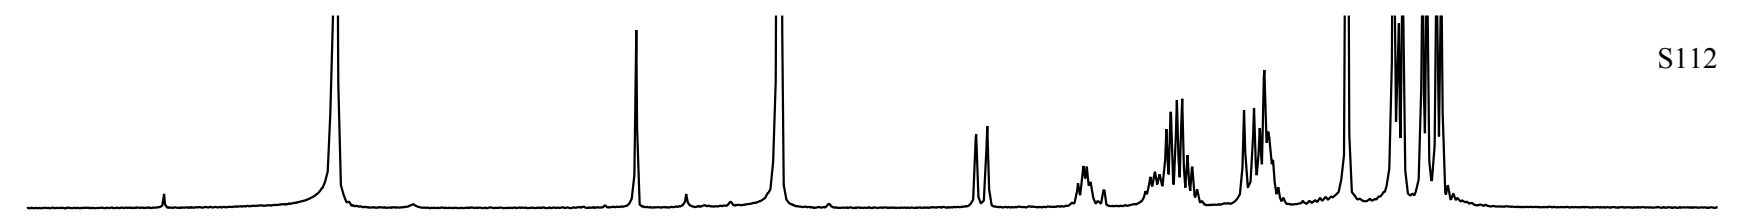

| Parameter              | Value                                              |
|------------------------|----------------------------------------------------|
| Data File Name         | / Volumes/ nmrdata/ ahan/ nmr/ 9-AH-094-CH/ 7/ ser |
| Title                  | 9-AH-094-CH.7.ser                                  |
| Origin                 | Bruker BioSpin GmbH                                |
| Solvent                | MeOD                                               |
| Temperature            | 295.2                                              |
| Pulse Sequence         | cosygpppqf                                         |
| Number of Scans        | 10                                                 |
| Receiver Gain          | 142.8                                              |
| Relaxation Delay       | 1.0000                                             |
| Pulse Width            | 11.7000                                            |
| Acquisition Time       | 0.1970                                             |
| Acquisition Date       | 2018-09-13T02:58:21                                |
| Spectrometer Frequency | (400.13, 400.13)                                   |
| Spectral Width         | (5197.5, 5197.5)                                   |
| Lowest Frequency       | (-198.0, -198.0)                                   |
| Nucleus                | (1H, 1H)                                           |
| Acquired Size          | (1024, 128)                                        |
| Spectral Size          | (1024, 1024)                                       |

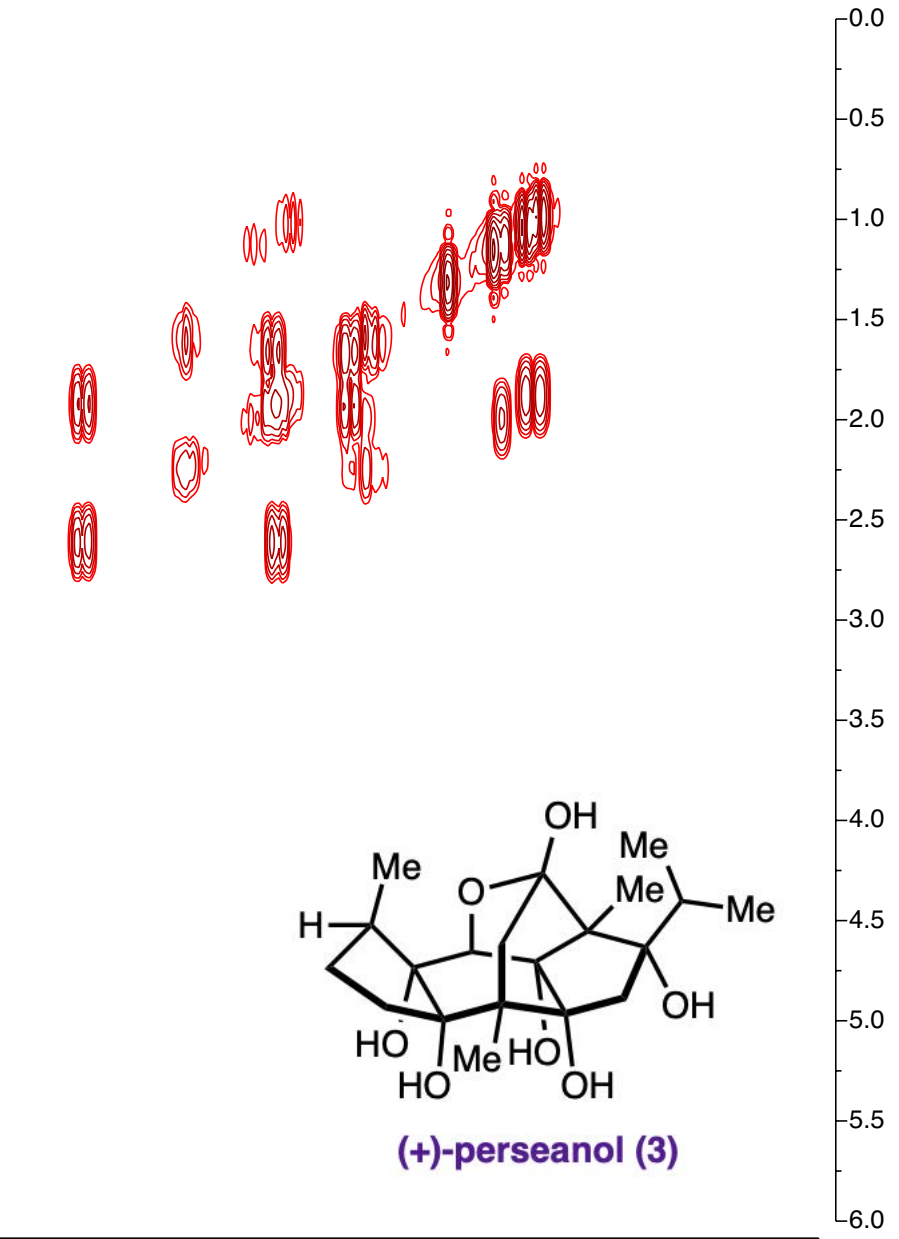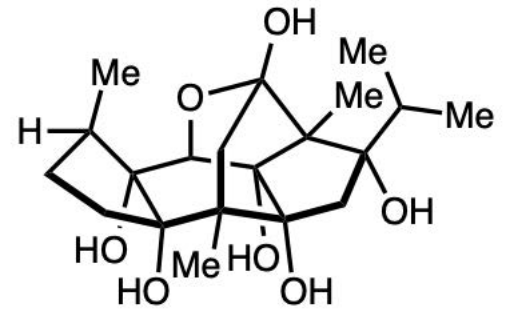

**(+)-perseanol (3)**

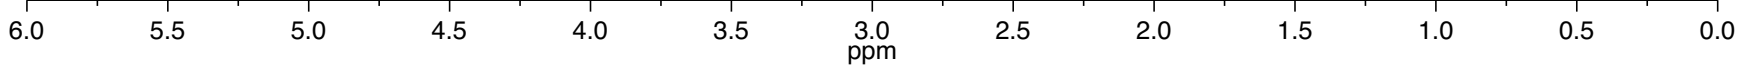

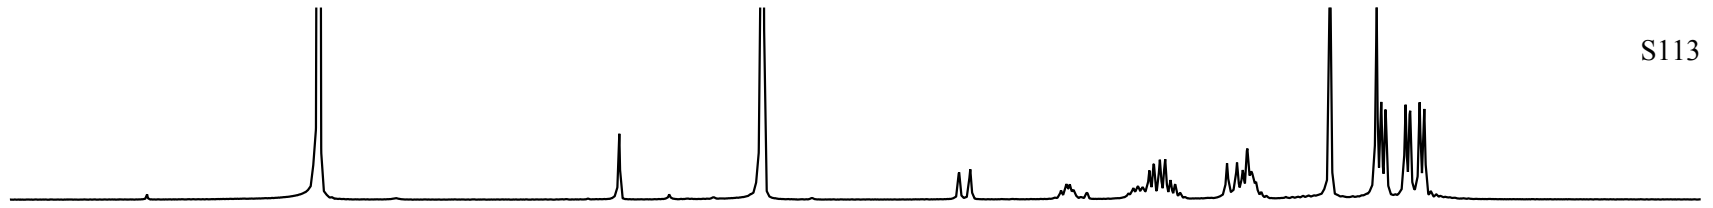

| Parameter              | Value                                              |
|------------------------|----------------------------------------------------|
| Data File Name         | / Volumes/ nmrdata/ ahan/ nmr/ 9-AH-094-CH/ 4/ ser |
| Title                  | 9-AH-094-CH.4.ser                                  |
| Origin                 | Bruker BioSpin GmbH                                |
| Solvent                | MeOD                                               |
| Temperature            | 295.2                                              |
| Pulse Sequence         | hsqcedetgpsisp2.4                                  |
| Number of Scans        | 8                                                  |
| Receiver Gain          | 197.4                                              |
| Relaxation Delay       | 1.0000                                             |
| Pulse Width            | 11.7000                                            |
| Acquisition Time       | 0.2135                                             |
| Acquisition Date       | 2018-09-12T23:34:23                                |
| Spectrometer Frequency | (400.13, 100.62)                                   |
| Spectral Width         | (4795.4, 16611.3)                                  |
| Lowest Frequency       | (-517.1, -1335.2)                                  |
| Nucleus                | (1H, 13C)                                          |
| Acquired Size          | (1024, 180)                                        |
| Spectral Size          | (1024, 1024)                                       |

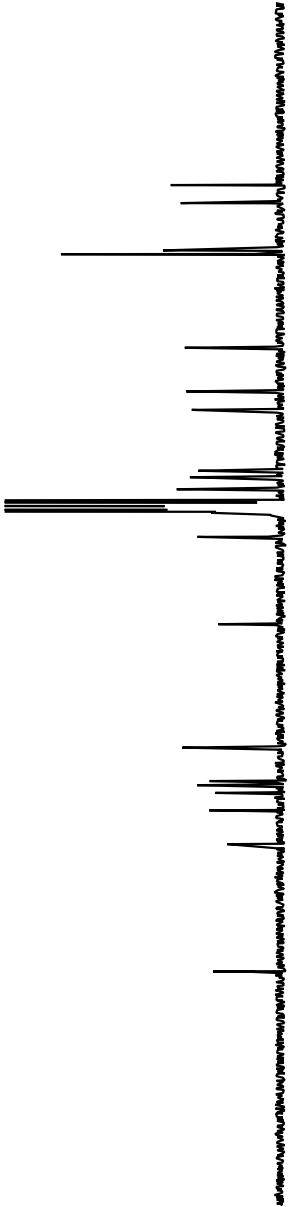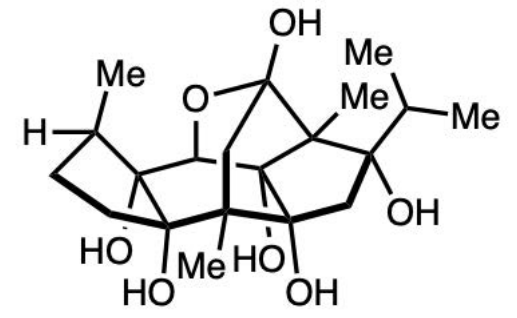

**(+)-perseanol (3)**

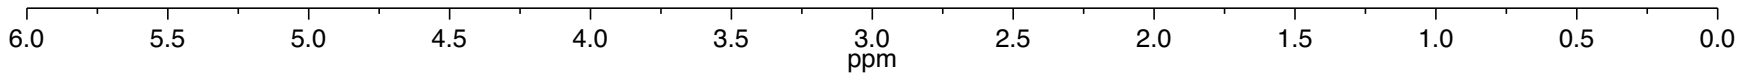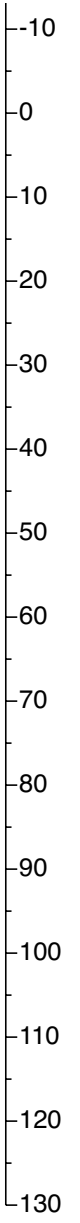

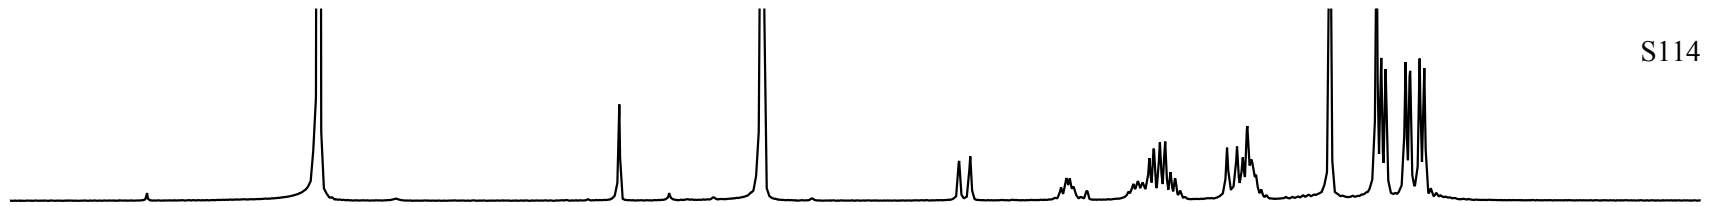

| Parameter              | Value                                              |
|------------------------|----------------------------------------------------|
| Data File Name         | / Volumes/ nmrdata/ ahan/ nmr/ 9-AH-094-CH/ 5/ ser |
| Title                  | 9-AH-094-CH.5.ser                                  |
| Origin                 | Bruker BioSpin GmbH                                |
| Solvent                | MeOD                                               |
| Temperature            | 295.2                                              |
| Pulse Sequence         | hmbcetgpl3nd                                       |
| Number of Scans        | 9                                                  |
| Receiver Gain          | 197.4                                              |
| Relaxation Delay       | 1.0000                                             |
| Pulse Width            | 11.7000                                            |
| Acquisition Time       | 0.4260                                             |
| Acquisition Date       | 2018-09-13T00:05:03                                |
| Spectrometer Frequency | (400.13, 100.62)                                   |
| Spectral Width         | (4807.7, 22321.4)                                  |
| Lowest Frequency       | (-163.1, -1188.8)                                  |
| Nucleus                | (1H, 13C)                                          |
| Acquired Size          | (2048, 256)                                        |
| Spectral Size          | (2048, 1024)                                       |

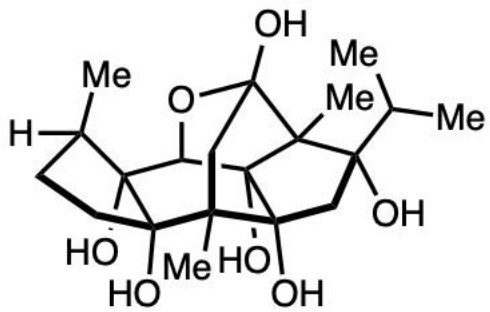

**(+)-perseanol (3)**

6.0 5.5 5.0 4.5 4.0 3.5 3.0 2.5 2.0 1.5 1.0 0.5 0.0  
ppm

-10  
0  
10  
20  
30  
40  
50  
60  
70  
80  
90  
100  
110  
120  
130

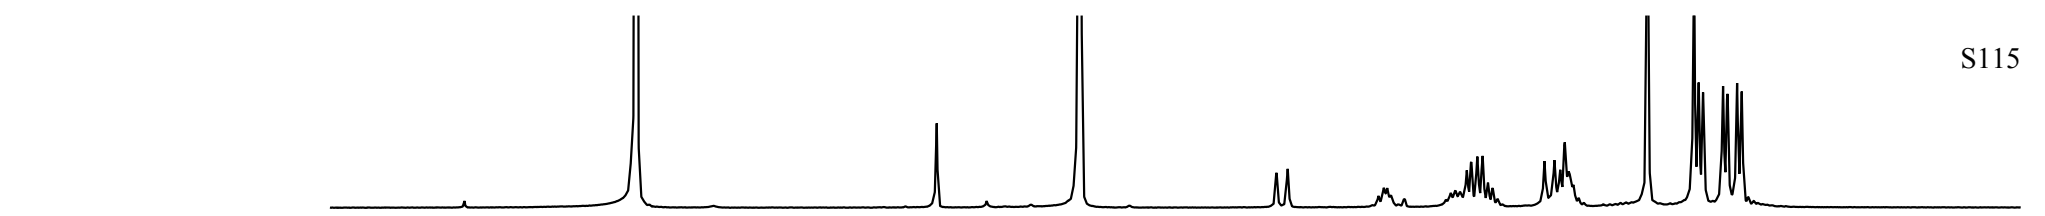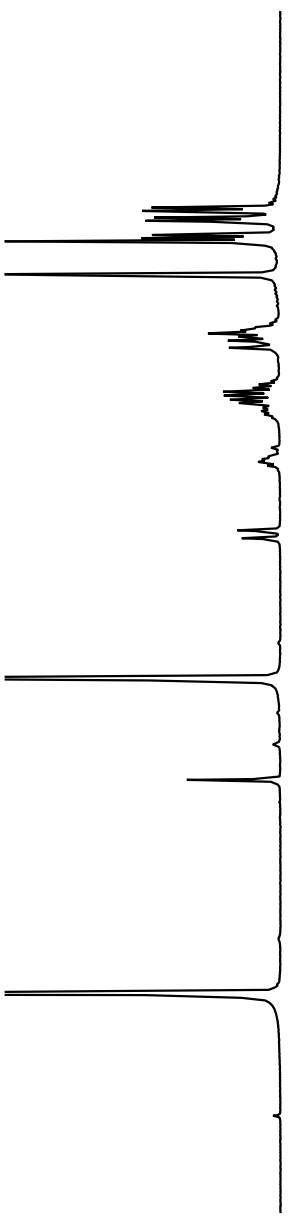

| Parameter              | Value                                              |
|------------------------|----------------------------------------------------|
| Data File Name         | / Volumes/ nmrdata/ ahan/ nmr/ 9-AH-094-CH/ 6/ ser |
| Title                  | 9-AH-094-CH.6.ser                                  |
| Origin                 | Bruker BioSpin GmbH                                |
| Solvent                | MeOD                                               |
| Temperature            | 295.2                                              |
| Pulse Sequence         | noesygppts                                         |
| Number of Scans        | 15                                                 |
| Receiver Gain          | 197.4                                              |
| Relaxation Delay       | 1.0000                                             |
| Pulse Width            | 11.7000                                            |
| Acquisition Time       | 0.2560                                             |
| Acquisition Date       | 2018-09-13T01:04:27                                |
| Spectrometer Frequency | (400.13, 400.13)                                   |
| Spectral Width         | (4000.0, 4000.0)                                   |
| Lowest Frequency       | (-158.1, -158.1)                                   |
| Nucleus                | (1H, 1H)                                           |
| Acquired Size          | (1024, 256)                                        |
| Spectral Size          | (1024, 1024)                                       |

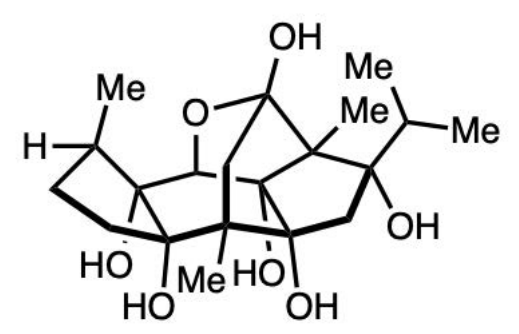

**(+)-perseanol (3)**

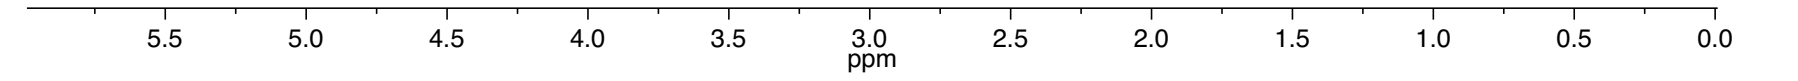

*natural perseanol*  
*<sup>1</sup>H NMR (400 MHz, CD<sub>3</sub>OD)*

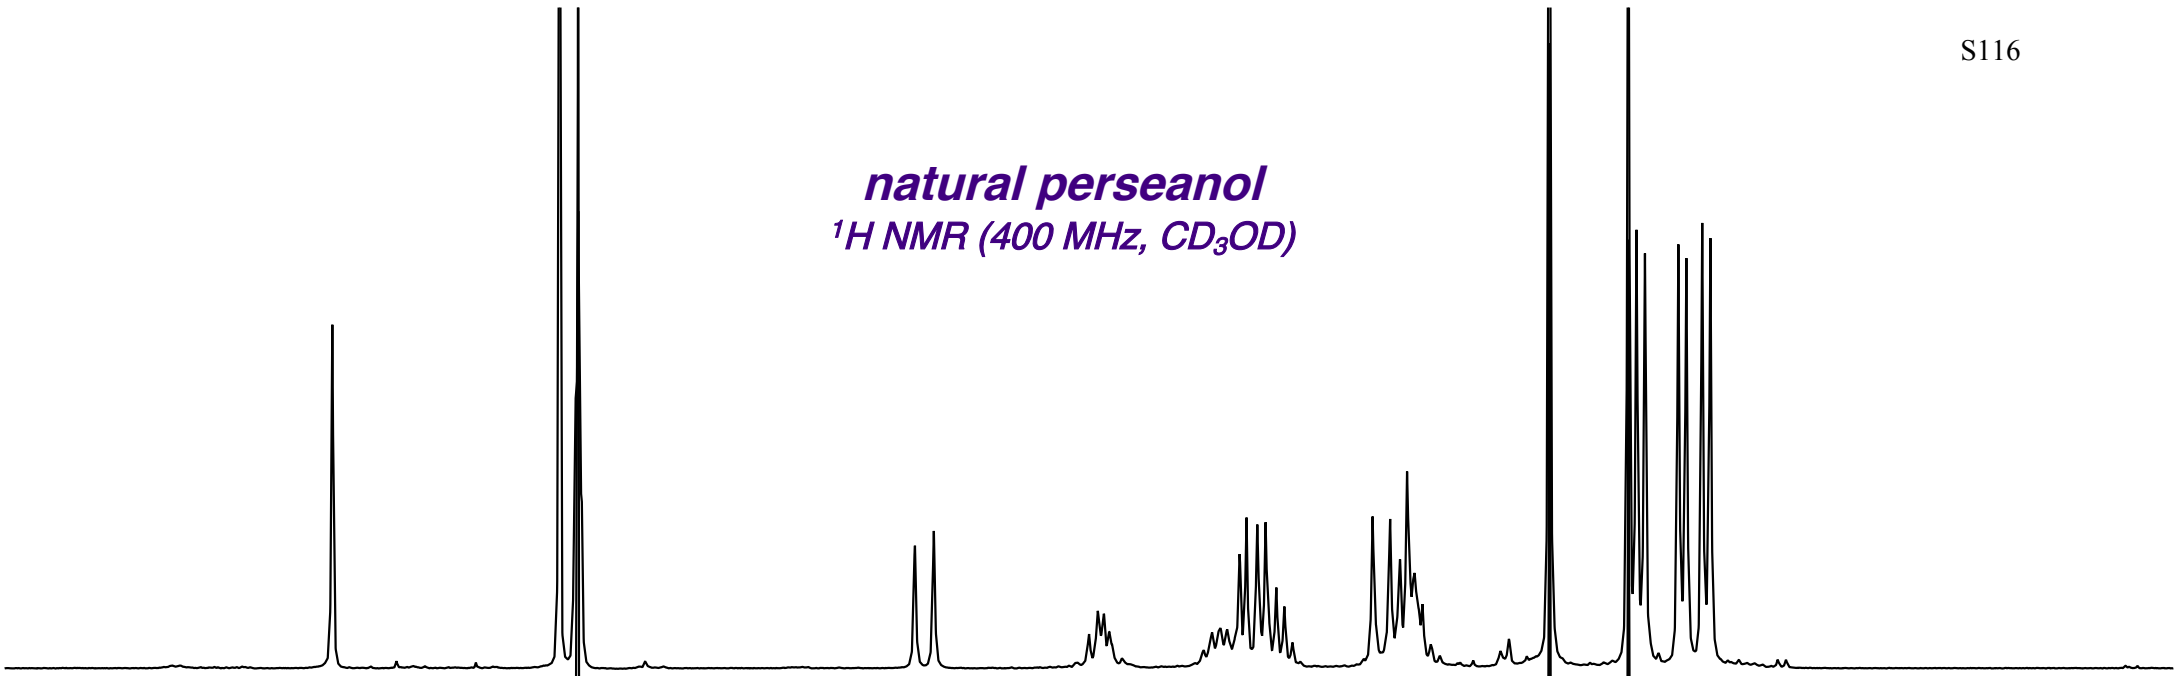

*synthetic perseanol*  
*<sup>1</sup>H NMR (400 MHz, CD<sub>3</sub>OD)*

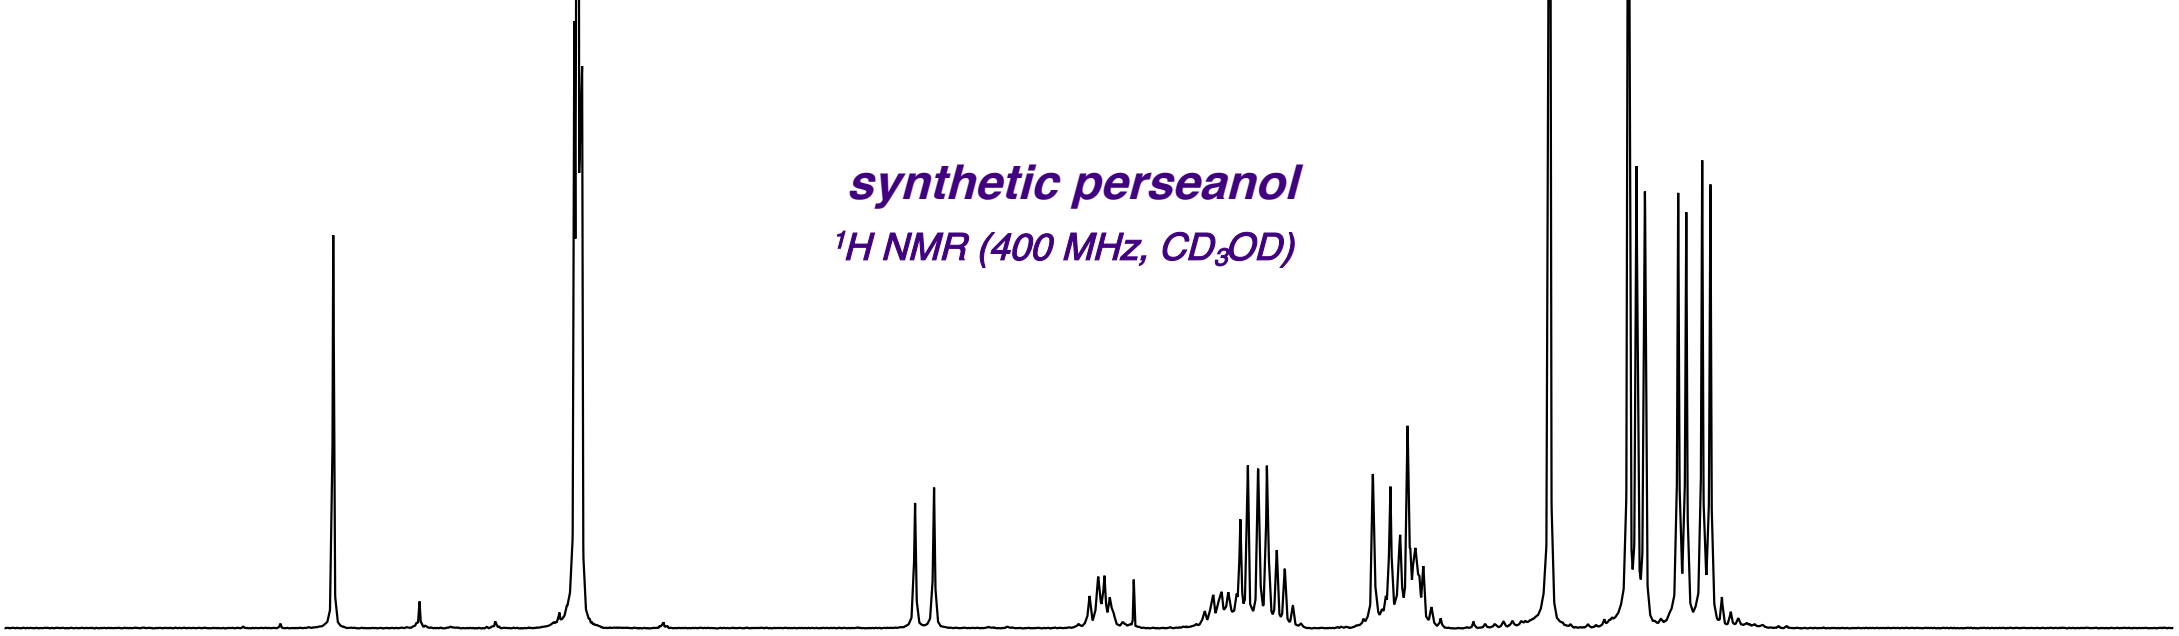

5 4.0 3.5 3.0 2.5 ppm 2.0 1.5 1.0 0.5 0.



*natural perseanol*  
 $^{13}\text{C}$  NMR (101 MHz,  $\text{CD}_3\text{OD}$ )

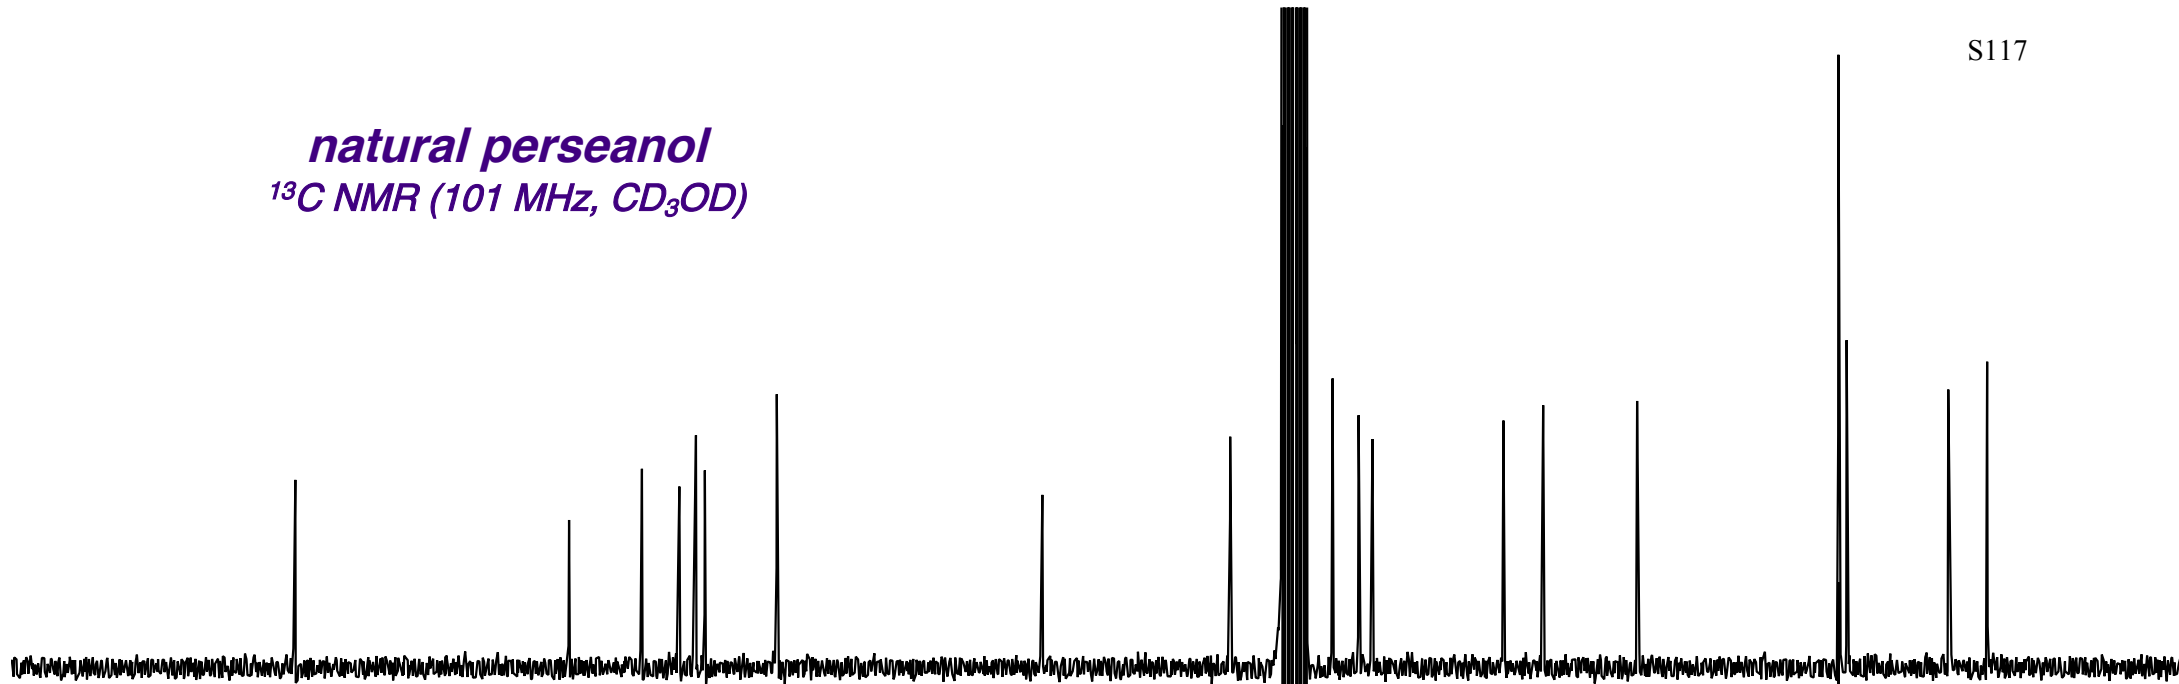

*synthetic perseanol*  
 $^{13}\text{C}$  NMR (101 MHz,  $\text{CD}_3\text{OD}$ )

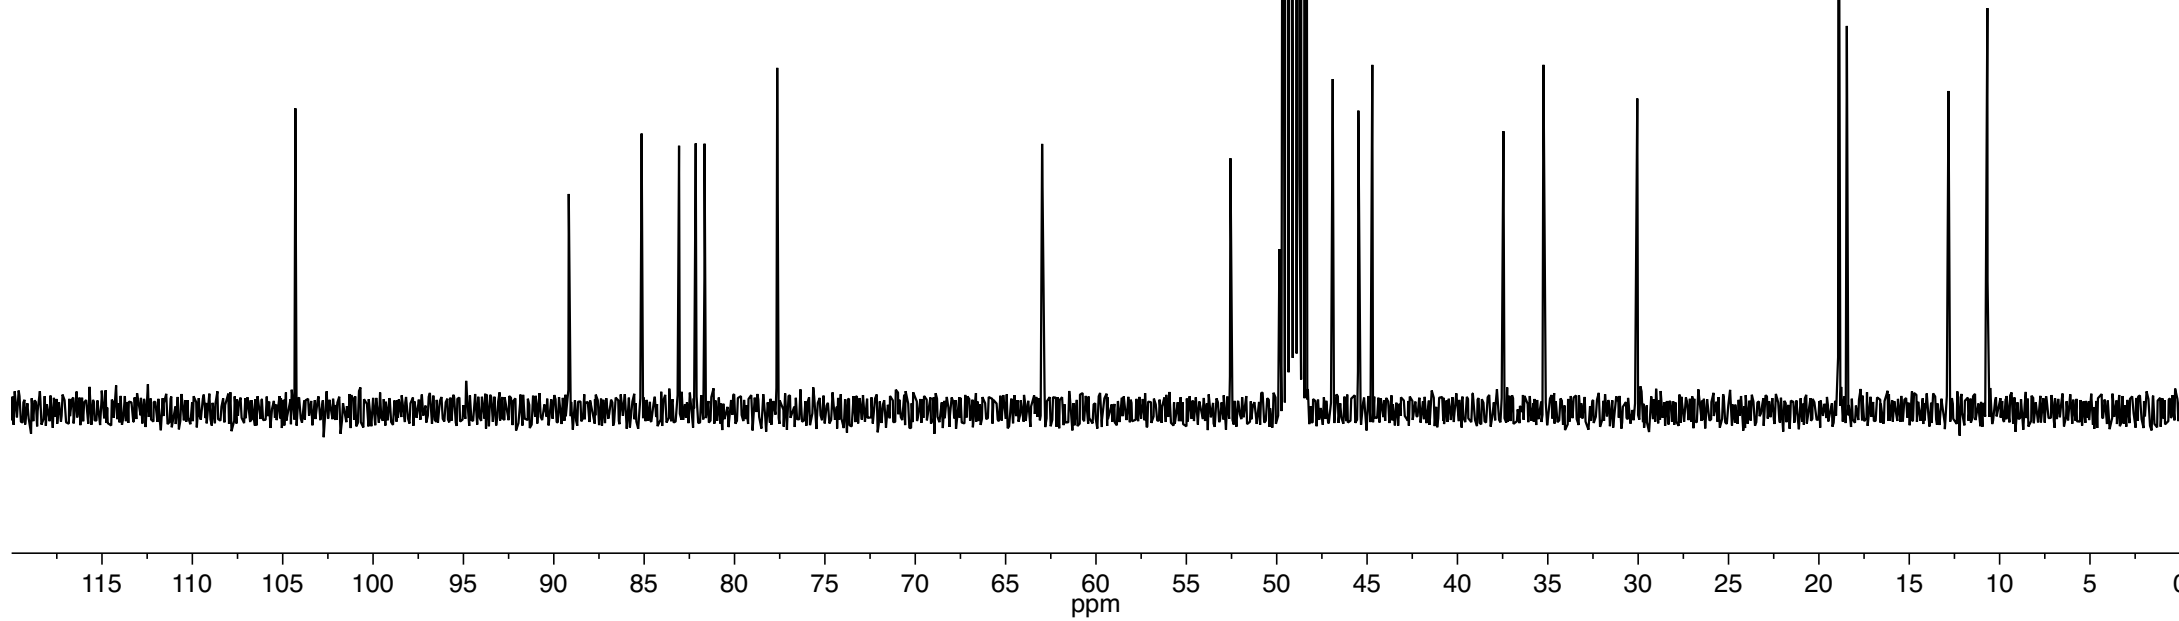

Supplement: NIHMS1534919-supplement-1.pdf [file NIHMS1534919-supplement-1.pdf]
